# Supplementary material for: A Bibliometric Analysis on Mental Health Research Over the Past Two Decades
Source: Research Square preprint supplement (doi:10.21203/rs.3.rs-6078850/v1), 2025-03-04
Supplement: Supplementary file 1 [file ba1fcaa805eefaf6746a2a39.xlsx]

## Sheet: downloadcombined
Authors	Cited References	Abstract	Author Affiliations	Keywords	DOI	Document Type	Keywords Plus	Journal Abbreviation	ISO Journal Abbreviation	Language	Publisher	Publication Year	Reprint Address	ISSN	Source Title	Times Cited	Article Title	Volume	Database	Author University	First Author University	Full Citation	Short Citation
JAYASANKAR P;MANJUNATHA N;RAO G;GURURAJ G;VARGHESE M;BENEGAL V	AFIFI M., 2007, SMJ SINGAPORE MEDICAL JOURNAL, V48, P385;ANTUNES A, 2018, EUR PSYCHIAT, V49, P56, DOI 10.1016/J.EURPSY.2017.12.004;CHANDRA PS, 2010, INT REV PSYCHIATR, V22, P513, DOI 10.3109/09540261.2010.516427;CHANDRAMOULI C., 2011, CENSUS INDIA 2011 PR, P409;CHATURVEDI S, 2019, URBAN MENTAL HEALTH, P226;CHISHOLM D, 2016, LANCET PSYCHIAT, V3, P415, DOI 10.1016/S2215-0366(16)30024-4;DE BERARDIS …	BACKGROUND: DESPITE THEIR HIGHER PREVALENCE, THE COMMON MENTAL DISORDERS (CMDS) ARE UNDER-RECOGNIZED AND UNDER-TREATED RESULTING IN HUGE DISABILITY. INDIA, HOME TO ONE-FIFTH OF THE GLOBAL POPULATION, COULD OFFER INSIGHTS FOR ORGANIZING BETTER SERVICES FOR CMDS. HOWEVER, THE PREVALENCE AND RESULTANT DISABILITY IN THE GENERAL POPULATION IS UNKNOWN, AND CONSEQUENTLY, GAPS IN MANAGEMENT OR PLAN FOR S…	NATL INST MENTAL HLTH & NEUROSCI, DEPT PSYCHIAT, BENGALURU 560029, KARNATAKA, INDIA.; NATL INST MENTAL HLTH & NEUROSCI, TELE MED CTR, DEPT PSYCHIAT, BENGALURU, KARNATAKA, INDIA.; NATL INST MENTAL HLTH & NEUROSCI, CTR PUBL HLTH, DEPT EPIDEMIOL, BENGALURU, KARNATAKA, INDIA.; WHO COLLABORAT CTR INJURY PREVENT & SAFETY PROMOT, CTR PUBL HLTH, DEPT EPIDEMIOL, NATL INST MENTAL HLTH & NEUROSCI, BENGALURU…	ANXIETY DISORDERS; COMMON MENTAL DISORDERS; DEPRESSIVE DISORDERS; INDIA; NATIONAL MENTAL HEALTH SURVEY; PREVALENCE	10.4103/indianjpsychiatry.indianjpsychiatry_865_21	ARTICLE	CARE PSYCHIATRY PROGRAM; PREVALENCE; SCHIZOPHRENIA	INDIAN J PSYCHIAT	INDIAN J. PSYCHIATRY	ENGLISH	WOLTERS KLUWER MEDKNOW PUBLICATIONS	2022	MANJUNATHA, N (CORRESPONDING AUTHOR), NATL INST MENTAL HLTH & NEUROSCI, DEPT PSYCHIAT, BENGALURU 560029, KARNATAKA, INDIA.	0019-5545	INDIAN JOURNAL OF PSYCHIATRY	24	EPIDEMIOLOGY OF COMMON MENTAL DISORDERS RESULTS FROM NATIONAL MENTAL HEALTH SURVEY OF INDIA 2016	64	ISI	NATIONAL INSTITUTE OF MENTAL HEALTH AND NEUROSCIENCES - INDIA; NATIONAL INSTITUTE OF MENTAL HEALTH AND NEUROSCIENCES - INDIA; NATIONAL INSTITUTE OF MENTAL HEALTH AND NEUROSCIENCES - INDIA; NATIONAL INSTITUTE OF MENTAL HEALTH AND NEUROSCIENCES - INDIA; NATIONAL INSTITUTE OF MENTAL HEALTH AND NEUROSCIENCES - INDIA	NATL INST MENTAL HLTH AND NEUROSCI	JAYASANKAR P, 2022, INDIAN J PSYCHIAT	JAYASANKAR P, 2022, INDIAN J PSYCHIAT
CUMMINGS J	ACEVEDO-GARCIA D., 2003, NEIGHBORHOODS AND HEALTH, P265;AMERICAN ACADEMY OF CHILD AND ADOLESCENT PSYCHIATRY, 2013, PRACT PAR CULT COMP;ANDERSEN RM., 2001, CHANGING S HLTH CARE, P3;ANESHENSEL CS, 1996, J HEALTH SOC BEHAV, V37, P293, DOI 10.2307/2137258;ANONYMOUS, 2013, REP C NAT SUBST AB M;ANONYMOUS, 2024, RACE AND SOCIAL PROBLEMS;ANONYMOUS, 2002, HEIRARCHICAL LINEAR;ANONYMOUS, 2007, STATA STATIST…	MOST ADOLESCENTS WITH DEPRESSIVE DISORDERS DO NOT RECEIVE ANY MENTAL HEALTH SERVICES, EVEN THOUGH EFFECTIVE TREATMENTS EXIST. ALTHOUGH RESEARCH HAS EXAMINED NUMEROUS INDIVIDUAL-LEVEL FACTORS ASSOCIATED WITH MENTAL HEALTH SERVICE USE AMONG DEPRESSED ADOLESCENTS, LESS IS KNOWN ABOUT THE ROLE OF CONTEXTUAL FACTORS. THIS STUDY EXAMINES THE RELATIONSHIP BETWEEN CONTEXTUAL-LEVEL SOCIOECONOMIC STATUS (S…	EMORY UNIV, ROLLINS SCH PUBL HLTH, DEPT HLTH POLICY & MANAGEMENT, ATLANTA, GA 30322 USA.;	COMMUNITY SOCIOECONOMIC STATUS; MENTAL HEALTH SERVICES; ADOLESCENTS; DEPRESSION	10.1007/s10964-013-0021-7	ARTICLE	SUPPLEMENT NCS-A; MULTILEVEL ANALYSIS; UNITED-STATES; CHILDREN; DISORDERS; SERVICES; CARE; MEDICATIONS; PREVALENCE; SAMPLE	J YOUTH ADOLESCENCE	J. YOUTH ADOLESC.	ENGLISH	SPRINGER/PLENUM PUBLISHERS	2014	CUMMINGS, JR (CORRESPONDING AUTHOR), EMORY UNIV, ROLLINS SCH PUBL HLTH, DEPT HLTH POLICY & MANAGEMENT, 1518 CLIFTON RD NE,SUITE 650, ATLANTA, GA 30322 USA.	0047-2891	JOURNAL OF YOUTH AND ADOLESCENCE	21	CONTEXTUAL SOCIOECONOMIC STATUS AND MENTAL HEALTH COUNSELING USE AMONG US ADOLESCENTS WITH DEPRESSION	43	ISI	EMORY UNIVERSITY; ROLLINS SCHOOL PUBLIC HEALTH	EMORY UNIV	CUMMINGS JR, 2014, J YOUTH ADOLESCENCE	CUMMINGS JR, 2014, J YOUTH ADOLESCENCE
PINTO-MEZA A;MONETA M;ALONSO J;ANGERMEYER M;BRUFFAERTS R;DE A J;DE G G;DE G R;FLORESCU S;MASFETY V;O'NEILL S;VASSILEV S;HARO J	ALMEIDA N, 2004, SOC SCI MED, V59, P1339, DOI 10.1016/J.SOCSCIMED.2003.11.037;ALONSO J, 2004, ACTA PSYCHIAT SCAND, V109, P8;ANONYMOUS, SAS SOFTW VERS 9 1;ANONYMOUS, GREEN PAP IMPR MENT;BLOOMFIELD K, 2006, ALCOHOL ALCOHOLISM, V41, PI26, DOI 10.1093/ALCALC/AGL073;BRADLEY RH, 2002, ANNU REV PSYCHOL, V53, P371, DOI 10.1146/ANNUREV.PSYCH.53.100901.135233;COHIDON C, 2009, AM J IND MED, V52, P141, DOI 1…	THE OBJECTIVE OF THE PRESENT STUDY WAS TO PROVIDE UPDATED DATA FROM NINE EUROPEAN COUNTRIES ABOUT THE IMPACT OF SOCIAL INEQUALITIES IN THE PREVALENCE OF COMMON MENTAL DISORDERS. CROSS-SECTIONAL HOUSEHOLD SURVEY OF A REPRESENTATIVE SAMPLE OF THE ADULT GENERAL POPULATION OF BELGIUM, BULGARIA, GERMANY, ITALY, THE NETHERLANDS, NORTHERN IRELAND, PORTUGAL, ROMANIA AND SPAIN. IN TOTAL, 34,395 INDIVIDUAL…	HOSP DEL MAR, IMIM, MED RES INST, HLTH SERV RES UNIT, BARCELONA 08003, SPAIN.; CIBER EPIDEMIOL & SALUD PUBL CIBERESP, PROGRAM EPIDEMIOL, BARCELONA, SPAIN.; POMPEU FABRA UNIV UPF, PROGRAM PUBL HLTH, BARCELONA, SPAIN.; CTR PUBL MENTAL HLTH, A-3482 GOSING AM WAGRAM, AUSTRIA.; KATHOLIEKE UNIV LEUVEN UPC KUL, UNIV PSYCHIAT CTR, B-3000 LOUVAIN, BELGIUM.; NOVA UNIV LISBON, FAC MED SCI, P-1169056 LISBON,…	SOCIAL INEQUALITIES; MENTAL HEALTH; EUROPE; RISK FACTORS; GENERAL POPULATION	10.1007/s00127-012-0536-3	ARTICLE	SOCIOECONOMIC-STATUS; INCOME INEQUALITY; DISORDERS; GENDER; ORGANIZATION; DEPRESSION; PREVALENCE; ETHNICITY; BRITAIN	SOC PSYCH PSYCH EPID	SOC. PSYCHIATRY PSYCHIATR. EPIDEMIOL.	ENGLISH	SPRINGER HEIDELBERG	2013	PINTO-MEZA, A (CORRESPONDING AUTHOR), PARC SANITARI ST JOAN DE DEU,C DR ANTONI PUJADAS, BARCELONA 08830, SPAIN.	0933-7954	SOCIAL PSYCHIATRY AND PSYCHIATRIC EPIDEMIOLOGY	55	SOCIAL INEQUALITIES IN MENTAL HEALTH RESULTS FROM THE EU CONTRIBUTION TO THE WORLD MENTAL HEALTH SURVEYS INITIATIVE	48	ISI	HOSPITAL DEL MAR RESEARCH INSTITUTE; HOSPITAL DEL MAR; CIBER - CENTRO DE INVESTIGACION BIOMEDICA EN RED; CIBERESP; POMPEU FABRA UNIVERSITY; KU LEUVEN; UNIVERSIDADE NOVA DE LISBOA; IRCCS FATEBENEFRATELLI; TRIMBOS INSTITUTE; ULSTER UNIVERSITY; NEW BULGARIAN UNIVERSITY; CIBER - CENTRO DE INVESTIGACION BIOMEDICA EN RED; CIBERSAM	A (CORRESPONDING AUTHOR)	PINTO-MEZA A, 2013, SOC PSYCH PSYCH EPID	PINTO-MEZA A, 2013, SOC PSYCH PSYCH EPID
ROELEN C;VAN R W;KOOPMANS P;BÂšLTMANN U;GROOTHOFF J;VAN D K J	ARAI M, 2005, LABOUR ECON, V12, P269, DOI 10.1016/J.LABECO.2003.11.009;HENSING G, 2004, SCAND J PUBLIC HEALT, V32, P152, DOI 10.1080/14034950410021871;HESSELIUS P., 2007, THE JOURNAL OF SOCIO-ECONOMICS, V36, P288, DOI DOI 10.1016/J.SOCEC.2005.11.037.1053-5357;KIVIMAKI M, 1997, J APPL PSYCHOL, V82, P858, DOI 10.1037/0021-9010.82.6.858;LEIGH JP, 1985, J ECON BUS, V37, P159, DOI 10.1016/0148-6195(85…	BACKGROUND SICKNESS ABSENCE (SA) IS AFFECTED BY SOCIETAL FACTORS. INCREASING SOCIOECONOMIC STRESS MAY CAUSE OR WORSEN MENTAL HEALTH DISORDERS, WHICH ARE AMONG THE MOST FREQUENT CAUSES OF SA. EMPLOYEES MAY ALSO BE MORE CAUTIOUS ABOUT BEING ABSENT, FOR EXAMPLE IN TIMES OF POOR ECONOMY. AIMS TO MONITOR THE INCIDENCE OF SA DUE TO MENTAL HEALTH DISORDERS IN THE NETHERLANDS FROM 2001 TO 2010. METHODS D…	UNIV GRONINGEN, UNIV MED CTR GRONINGEN, DEPT HLTH SCI, NL-9700 AD GRONINGEN, NETHERLANDS.; BUSINESS UNIV NYENRODE, CTR HUMAN RESOURCE ORG & MANAGEMENT EFFECTIVENESS, NL-3620 AC BREUKELEN, NETHERLANDS.;	ECONOMY; EPIDEMIOLOGY; MENTAL DISORDERS; MENTAL HEALTH; SICK LEAVE; SICKNESS ABSENCE	10.1093/occmed/kqs065	ARTICLE	ABSENTEEISM	OCCUP MED-OXFORD	OCCUP. MED.-OXF.	ENGLISH	OXFORD UNIV PRESS	2012	ROELEN, CAM (CORRESPONDING AUTHOR), 365 ARBONED,POB 158, NL-8000 AD ZWOLLE, NETHERLANDS.	0962-7480	OCCUPATIONAL MEDICINE-OXFORD	6	SICKNESS ABSENCE DUE TO MENTAL HEALTH DISORDERSA SOCIETAL PERSPECTIVE	62	ISI	UNIVERSITY OF GRONINGEN	CAM (CORRESPONDING AUTHOR)	ROELEN CAM, 2012, OCCUP MED-OXFORD	ROELEN CAM, 2012, OCCUP MED-OXFORD
AUERBACH R;ALONSO J;AXINN W;CUIJPERS P;EBERT D;GREEN J;HWANG I;KESSLER R;LIU H;MORTIER P;NOCK M;PINDER-AMAKER S;SAMPSON N;AGUILAR-GAXIOLA S;AL-HAMZAWI A;ANDRADE L;BENJET C;CALDAS-DE-ALMEIDA J;DEMYTTENAERE K;FLORESCU S;DE G G;GUREJE O;HARO J;KARAM E;KIEJNA A;KOVESS-MASFETY V;LEE S;MCGRATH J;O'NEILL S;PENNELL B;SCOTT K;TEN H M;TORRES Y;ZASLAVSKY A;ZARKOV Z;BRUFFAERTS R	ANONYMOUS, DAT COUNTR EC;ANONYMOUS, 2015, MENT HLTH ATL 2014;BLANCO C, 2008, ARCH GEN PSYCHIAT, V65, P1429, DOI 10.1001/ARCHPSYC.65.12.1429;CHO SB, 2015, FRONT PSYCHIATRY, V6, DOI 10.3389/FPSYT.2015.00152;COSTELLO EJ, 2005, J AM ACAD CHILD PSY, V44, P972, DOI 10.1097/01.CHI.0000172552.41596.6F;COSTELLO EJ, 2002, BIOL PSYCHIAT, V52, P529, DOI 10.1016/S0006-3223(02)01372-0;EISENBERG D, 2007, AM J O…	BACKGROUND ALTHOUGH MENTAL DISORDERS ARE SIGNIFICANT PREDICTORS OF EDUCATIONAL ATTAINMENT THROUGHOUT THE ENTIRE EDUCATIONAL CAREER, MOST RESEARCH ON MENTAL DISORDERS AMONG STUDENTS HAS FOCUSED ON THE PRIMARY AND SECONDARY SCHOOL YEARS. METHOD THE WORLD HEALTH ORGANIZATION WORLD MENTAL HEALTH SURVEYS WERE USED TO EXAMINE THE ASSOCIATIONS OF MENTAL DISORDERS WITH COLLEGE ENTRY AND ATTRITION BY COMP…	HARVARD MED SCH, DEPT PSYCHIAT, BOSTON, MA USA.; MCLEAN HOSP, CTR DEPRESS ANXIETY & STRESS RES, 115 MILL ST, BELMONT, MA 02178 USA.; INST HOSP MAR INVEST MED IMIM, BARCELONA, SPAIN.; CIBERESP CIBER EPIDEMIOL & SALUD PUBL, MADRID, SPAIN.; UNIV POMPEU FABRA, DEPT EXPT & HLTH SCI, BARCELONA, SPAIN.; UNIV MICHIGAN, INST SOCIAL RES, DEPT SOCIOL, CTR POPULAT STUDIES, ANN ARBOR, MI USA.; VRIJE UNIV AMST…	COLLEGE ATTRITION; COLLEGE DROPOUT; EDUCATION; EPIDEMIOLOGY; MENTAL ILLNESS	10.1017/S0033291716001665	ARTICLE	MIDDLE-INCOME COUNTRIES; PSYCHIATRIC-DISORDERS; EDUCATIONAL-ATTAINMENT; SOCIOECONOMIC-STATUS; UNIVERSITY-STUDENTS; RISK-FACTORS; DEPRESSION; ANXIETY; INTERVENTIONS; CONSEQUENCES	PSYCHOL MED	PSYCHOL. MED.	ENGLISH	CAMBRIDGE UNIV PRESS	2016	KESSLER, RC (CORRESPONDING AUTHOR), HARVARD MED SCH, DEPT HLTH CARE POLICY, 180 LONGWOOD AVE, BOSTON, MA 02115 USA.	0033-2917	PSYCHOLOGICAL MEDICINE	839	MENTAL DISORDERS AMONG COLLEGE STUDENTS IN THE WORLD HEALTH ORGANIZATION WORLD MENTAL HEALTH SURVEYS	46	ISI	HARVARD UNIVERSITY; HARVARD MEDICAL SCHOOL; HARVARD UNIVERSITY; MCLEAN HOSPITAL; HOSPITAL DEL MAR RESEARCH INSTITUTE; CIBER - CENTRO DE INVESTIGACION BIOMEDICA EN RED; CIBERESP; POMPEU FABRA UNIVERSITY; UNIVERSITY OF MICHIGAN SYSTEM; UNIVERSITY OF MICHIGAN; VRIJE UNIVERSITEIT AMSTERDAM; VRIJE UNIVERSITEIT AMSTERDAM; UNIVERSITY OF ERLANGEN NUREMBERG; BOSTON UNIVERSITY; HARVARD UNIVERSITY; HARVARD …	HARVARD MED SCH	AUERBACH RP, 2016, PSYCHOL MED	AUERBACH RP, 2016, PSYCHOL MED
AHMAD F;JHAJJ A;STEWART D;BURGHARDT M;BIERMAN A	ALBIZU-GARCIA CE, 2001, SOC SCI MED, V53, P865, DOI 10.1016/S0277-9536(00)00380-4;ARKSEY H, 2005, INT J SOC RES METHOD, V8, P19, DOI DOI 10.1080/1364557032000119616;BERGERON E, 2005, CAN J PSYCHIAT, V50, P629, DOI 10.1177/070674370505001009;COHEN JORDAN S, 2005, BMC MED EDUC, V5, P21, DOI 10.1186/1472-6920-5-21;DE CASTRO AB, 2010, PUBLIC HEALTH NURS, V27, P492, DOI 10.1111/J.1525-1446.2010.00891.…	BACKGROUND: A SINGLE-ITEM MEASURE OF SELF-RATED MENTAL HEALTH (SRMH) IS BEING USED INCREASINGLY IN HEALTH RESEARCH AND POPULATION HEALTH SURVEYS. THE ITEM ASKS RESPONDENTS TO RATE THEIR MENTAL HEALTH ON A FIVE-POINT SCALE FROM EXCELLENT TO POOR. THIS SCOPING STUDY PRESENTS THE FIRST KNOWN REVIEW OF THE SRMH LITERATURE. METHODS: ELECTRONIC DATABASES OF MEDLINE, CINAHL, PSYCINFO, EMBASE AND COCHRAN…	YORK UNIV, FAC HLTH, SCH HLTH POLICY & MANAGEMENT, N YORK, ON M3J 1P3, CANADA.; OPTIMUS, TORONTO, ON M5C 3G8, CANADA.; UNIV TORONTO, UNIV HLTH NETWORK, WOMENS HLTH PROGRAM, TORONTO, ON M5G 2C4, CANADA.; YORK UNIV, FAC HLTH, SCH HLTH POLICY & MANAGEMENT, CRIT DISABIL STUDIES, N YORK, ON M3J 1P3, CANADA.; UNIV TORONTO, LAWRENCE S BLOOMBERG FAC NURSING, DALLA LANA SCH PUBL HLTH, INST HLTH POLICY MAN…	SELF RATED MENTAL HEALTH; SINGLE ITEM; REVIEW; MEASUREMENT	10.1186/1472-6963-14-398	REVIEW	OLDER-ADULTS; SERVICE USE; ANXIETY DISORDERS; DEPRESSION; CARE; DETERMINANTS; ASSOCIATIONS; PREVALENCE; IMMIGRATION; RELIABILITY	BMC HEALTH SERV RES	BMC HEALTH SERV. RES.	ENGLISH	BMC	2014	AHMAD, F (CORRESPONDING AUTHOR), YORK UNIV, FAC HLTH, SCH HLTH POLICY & MANAGEMENT, 4700 KEELE ST,HNES 414, N YORK, ON M3J 1P3, CANADA.		BMC HEALTH SERVICES RESEARCH	332	SINGLE ITEM MEASURES OF SELFRATED MENTAL HEALTH A SCOPING REVIEW	14	ISI	YORK UNIVERSITY - CANADA; UNIVERSITY OF TORONTO; UNIVERSITY HEALTH NETWORK TORONTO; YORK UNIVERSITY - CANADA; UNIVERSITY OF TORONTO; UNIVERSITY OF TORONTO; UNIVERSITY OF TORONTO; SAINT MICHAELS HOSPITAL TORONTO; LI KA SHING KNOWLEDGE INSTITUTE	YORK UNIV	AHMAD F, 2014, BMC HEALTH SERV RES	AHMAD F, 2014, BMC HEALTH SERV RES
WALKER E;DRUSS B	ALDWORTH J, 2010, INT J METH PSYCH RES, V19, P61, DOI 10.1002/MPR.312;ANONYMOUS, 2013, NSDUH SERIES H;ANONYMOUS, 2012, NSDUH SER;ANONYMOUS, 2011, RES 2010 NAT SURV DR;ANONYMOUS, 2002, DIAGN STAT MAN MENT, V4TH;BARNETT K, 2012, LANCET, V380, P37, DOI 10.1016/S0140-6736(12)60240-2;COOK JA, 2009, PSYCHIAT SERV, V60, P246, DOI 10.1176/PS.2009.60.2.246;DIEDERICHS C, 2011, J GERONTOL A-BIOL, V66, P301,…	THE HEALTH OF INDIVIDUALS IN THE U.S.A. IS INCREASINGLY BEING DEFINED BY COMPLEXITY AND MULTIMORBIDITY. WE EXAMINED THE PATTERNS OF CO-OCCURRENCE OF MENTAL ILLNESS, SUBSTANCE ABUSE/DEPENDENCE, AND CHRONIC MEDICAL CONDITIONS AND THE CUMULATIVE BURDEN OF THESE CONDITIONS AND LIVING IN POVERTY ON SELF-RATED HEALTH. WE CONDUCTED A SECONDARY DATA ANALYSIS USING PUBLICALLY-AVAILABLE DATA FROM THE NATIO…	EMORY UNIV, ROLLINS SCH PUBL HLTH, DEPT BEHAV SCI & HLTH EDUC, ATLANTA, GA 30322 USA.; EMORY UNIV, ROLLINS SCH PUBL HLTH, DEPT HLTH POLICY & MANAGEMENT, ATLANTA, GA USA.;	CHRONIC DISEASE; COMORBIDITY; MENTAL DISORDERS; SOCIOECONOMIC STATUS; SUBSTANCE USE	10.1080/13548506.2016.1227855	ARTICLE	SELF-RATED HEALTH; CARE; MULTIMORBIDITY; MANAGEMENT	PSYCHOL HEALTH MED	PSYCHOL. HEALTH MED.	ENGLISH	ROUTLEDGE JOURNALS, TAYLOR & FRANCIS LTD	2017	WALKER, ER (CORRESPONDING AUTHOR), EMORY UNIV, ROLLINS SCH PUBL HLTH, DEPT BEHAV SCI & HLTH EDUC, ATLANTA, GA 30322 USA.	1354-8506	PSYCHOLOGY HEALTH & MEDICINE	75	CUMULATIVE BURDEN OF COMORBID MENTAL DISORDERS SUBSTANCE USE DISORDERS CHRONIC MEDICAL CONDITIONS AND POVERTY ON HEALTH AMONG ADULTS IN THE USA	22	ISI	EMORY UNIVERSITY; ROLLINS SCHOOL PUBLIC HEALTH; EMORY UNIVERSITY; ROLLINS SCHOOL PUBLIC HEALTH	EMORY UNIV	WALKER ER, 2017, PSYCHOL HEALTH MED	WALKER ER, 2017, PSYCHOL HEALTH MED
GOLBERSTEIN E;GONZALES G;MEARA E	AIZER A., 2008, W14354 NBER;ANONYMOUS, 2012, INCOME POVERTY HLTH;ANONYMOUS, 2009, PREVENTING MENTAL EM;BERTRAND M, 2004, Q J ECON, V119, P249, DOI 10.1162/003355304772839588;BOURDON KH, 2005, J AM ACAD CHILD PSY, V44, P557, DOI 10.1097/01.CHI.0000159157.57075.C8;BRADFORD WD, 2014, HEALTH ECON, V23, P1301, DOI 10.1002/HEC.2983;BUSCH SH, 2014, J HUM RESOUR, V49, P540;CAMPBELL JY, 2007, J MONETARY E…	RESEARCH LINKING ECONOMIC CONDITIONS AND HEALTH OFTEN DOES NOT CONSIDER CHILDREN'S MENTAL HEALTH PROBLEMS, WHICH ARE THE MOST COMMON AND CONSEQUENTIAL HEALTH ISSUES FOR CHILDREN AND ADOLESCENTS. WE EXAMINE THE EFFECTS OF UNEMPLOYMENT RATES AND HOUSING PRICES ON WELL-VALIDATED CHILD AND ADOLESCENT MENTAL HEALTH OUTCOMES AND USE OF SPECIAL EDUCATION SERVICES FOR EMOTIONAL PROBLEMS IN THE 2001-2013 …	UNIV MINNESOTA, SCH PUBL HLTH, DIV HLTH POLICY & MANAGEMENT, MINNEAPOLIS, MN USA.; VANDERBILT UNIV, SCH MED, DEPT HLTH POLICY, NASHVILLE, TN 37212 USA.; VANDERBILT UNIV, SCH MED, CTR MED HLTH & SOC, NASHVILLE, TN 37212 USA.; DARTMOUTH COLL, DARTMOUTH INST HLTH POLICY & CLIN PRACTICE, GEISEL SCH MED, HANOVER, NH 03755 USA.; NBER, HANOVER, NH USA.;	CHILDREN; ECONOMIC CONDITIONS; MENTAL HEALTH; UNEMPLOYMENT	10.1002/hec.3885	ARTICLE	HUMAN-CAPITAL ACCUMULATION; DSM-IV DISORDERS; DIFFICULTIES QUESTIONNAIRE; SOCIOECONOMIC-STATUS; MARKET FLUCTUATIONS; CHILDHOOD; RECESSIONS; PREVALENCE; STRENGTHS; IMPACT	HEALTH ECON	HEALTH ECON.	ENGLISH	WILEY	2019	GOLBERSTEIN, E (CORRESPONDING AUTHOR), UNIV MINNESOTA, MINNEAPOLIS, MN 55455 USA.	1057-9230	HEALTH ECONOMICS	102	HOW DO ECONOMIC DOWNTURNS AFFECT THE MENTAL HEALTH OF CHILDREN EVIDENCE FROM THE NATIONAL HEALTH INTERVIEW SURVEY	28	ISI	UNIVERSITY OF MINNESOTA SYSTEM; UNIVERSITY OF MINNESOTA TWIN CITIES; VANDERBILT UNIVERSITY; VANDERBILT UNIVERSITY; DARTMOUTH COLLEGE; NATIONAL BUREAU OF ECONOMIC RESEARCH	UNIV MINNESOTA	GOLBERSTEIN E, 2019, HEALTH ECON	GOLBERSTEIN E, 2019, HEALTH ECON
DRUSS B;ZHAO L;VON E S;MORRATO E;MARCUS S	ANONYMOUS, LIFE COURSE APPROACH;BARKER P R, 1992, ADV DATA, P1;BRUCE ML, 1991, ARCH GEN PSYCHIAT, V48, P470;BRUCE ML, 1994, AM J PSYCHIAT, V151, P716;BRUCE ML, 1989, AM J PUBLIC HEALTH, V79, P727, DOI 10.2105/AJPH.79.6.727;CHWASTIAK LA, 2010, PSYCHOSOM MED, V72, P817, DOI 10.1097/PSY.0B013E3181EB33E9;COLTON CRAIG W, 2006, PREV CHRONIC DIS, V3, PA42;COPELAND LA, 2006, MED CARE, V44, P110, DOI 10.1…	BACKGROUND: ALTHOUGH GROWING CONCERN HAS BEEN EXPRESSED ABOUT PREMATURE MEDICAL MORTALITY IN PERSONS WITH MENTAL ILLNESS, LIMITED DATA ARE AVAILABLE QUANTIFYING THE EXTENT AND CORRELATES OF THIS PROBLEM USING POPULATION-BASED, NATIONALLY REPRESENTATIVE SAMPLES. METHODS: THE STUDY USED DATA FROM THE 1989 NATIONAL HEALTH INTERVIEW SURVEY MENTAL HEALTH SUPPLEMENT, WITH MORTALITY DATA THROUGH 2006 LI…	EMORY UNIV, DEPT HLTH POLICY & MANAGEMENT, ROLLINS SCH PUBL HLTH, ATLANTA, GA 30322 USA.; UNIV COLORADO, DENVER SCH PUBL HLTH, DEPT HLTH SYST MANAGEMENT & POLICY, AURORA, CO USA.; UNIV PENN, SCH SOCIAL WORK, SCH SOCIAL POLICY & PRACTICE, PHILADELPHIA, PA 19104 USA.;	MORTALITY; MENTAL DISORDERS; HEALTH SERVICES RESEARCH	10.1097/MLR.0b013e31820bf86e	ARTICLE	EPIDEMIOLOGIC CATCHMENT-AREA; HEALTH-CARE; PSYCHIATRIC-DISORDERS; STOCKHOLM COUNTY; OLDER PATIENTS; UNITED-STATES; SCHIZOPHRENIA; VETERANS; DEATH; COMMUNITY	MED CARE	MED. CARE	ENGLISH	LIPPINCOTT WILLIAMS & WILKINS	2011	DRUSS, BG (CORRESPONDING AUTHOR), EMORY UNIV, DEPT HLTH POLICY & MANAGEMENT, ROLLINS SCH PUBL HLTH, 1518 CLIFTON RD NE,ROOM 606, ATLANTA, GA 30322 USA.	0025-7079	MEDICAL CARE	360	UNDERSTANDING EXCESS MORTALITY IN PERSONS WITH MENTAL ILLNESS I17IIYEAR FOLLOW UP OF A NATIONALLY REPRESENTATIVE US SURVEYI	49	ISI	EMORY UNIVERSITY; ROLLINS SCHOOL PUBLIC HEALTH; UNIVERSITY OF COLORADO SYSTEM; UNIVERSITY OF COLORADO ANSCHUTZ MEDICAL CAMPUS; UNIVERSITY OF PENNSYLVANIA	EMORY UNIV	DRUSS BG, 2011, MED CARE	DRUSS BG, 2011, MED CARE
EISENBERG D;GOLBERSTEIN E;GOLLUST S	ANDERSEN RM, 1995, J HEALTH SOC BEHAV, V36, P1, DOI 10.2307/2137284;ANGST J, 1996, BRIT J PSYCHIAT, V168, P31, DOI 10.1192/S0007125000298383;ANONYMOUS, COND ED;ANONYMOUS, 1999, MENT HLTH REP SURG G;ANONYMOUS, 2024, RACE AND SOCIAL PROBLEMS;DIEZ-QUEVEDO C, 2001, PSYCHOSOM MED, V63, P679, DOI 10.1097/00006842-200107000-00021;DRUSS BENJAMIN G, 2004, MANAG CARE, V13, P48;EISENBERG D, IN PRESS AM J OR…	BACKGROUND: UNIVERSITY STUDENTS REPRESENT AN IMPORTANT POPULATION IN WHICH TO STUDY ACCESS TO MENTAL HEALTH CARE. UNDERSTANDING THEIR UNMET NEEDS WILL ENHANCE EFFORTS TO PREVENT AND TREAT MENTAL DISORDERS DURING A PIVOTAL PERIOD IN LIFE. OBJECTIVE: TO QUANTIFY MENTAL HEALTH SERVICE USE AND ESTIMATE HOW VARIOUS FACTORS ARE ASSOCIATED WITH HELP-SEEKING AND ACCESS IN A UNIVERSITY STUDENT POPULATION.…	UNIV MICHIGAN, SCH PUBL HLTH, DEPT HLTH MANAGEMENT & POLICY, ANN ARBOR, MI 48109 USA.;	COLLEGE STUDENTS; MENTAL HEALTH; HELP-SEEKING; ACCESS; BARRIERS	10.1097/MLR.0b013e31803bb4c1	ARTICLE	PSYCHIATRIC-DISORDERS; SOCIAL-CONSEQUENCES; MEDICAL-STUDENTS; SERVICES; DEPRESSION; PREVALENCE; BARRIERS; VALIDITY; ADULTS; QUESTIONNAIRE	MED CARE	MED. CARE	ENGLISH	LIPPINCOTT WILLIAMS & WILKINS	2007	EISENBERG, D (CORRESPONDING AUTHOR), UNIV MICHIGAN, SCH PUBL HLTH, DEPT HLTH MANAGEMENT & POLICY, 109 S OBSERV RD, ANN ARBOR, MI 48109 USA.	0025-7079	MEDICAL CARE	631	HELPSEEKING AND ACCESS TO MENTAL HEALTH CARE IN A UNIVERSITY STUDENT POPULATION	45	ISI	UNIVERSITY OF MICHIGAN SYSTEM; UNIVERSITY OF MICHIGAN	UNIV MICHIGAN	EISENBERG D, 2007, MED CARE	EISENBERG D, 2007, MED CARE
GLOVER M;FRASER T;BULLEN C;WALLACE-BELL M;MCROBBIE H;HADWEN G	ADAMSON SJ, 2006, AUST NZ J PSYCHIAT, V40, P164, DOI 10.1111/J.1440-1614.2006.01764.X;AJWANI S., 2003, DECADES DISPARITY ET;ANONYMOUS, 2020, BON HLTH NZ KNOW YOU;ANONYMOUS, 2006, TE KKIR MENT HLTH AD;ANONYMOUS, ADDR TOB MENT HLTH S;ANONYMOUS, CLEARING AIR DEBATIN;ANONYMOUS, TOBACCO MENTAL HLTH;ANONYMOUS, SMOK HOSP;ANONYMOUS, SMOK MENT HLTH FACTS;ANONYMOUS, IMPL SMOK FREE ENV M;ANONYMOUS, MOTIVATI…	TOBACCO SMOKING IS COMMON AMONG PEOPLE WITH MENTAL ILLNESSES, AND THEY CARRY A HIGHER BURDEN OF SMOKING-RELATED ILLNESSES. DESPITE THIS, SMOKE-FREE POLICIES AND SYSTEMS FOR SUPPORTING CESSATION HAVE PROVED DIFFICULT TO INTRODUCE IN MENTAL HEALTH AND DRUG AND ALCOHOL SERVICES (MHDAS). THIS PAPER EXAMINES THE BARRIERS TO BECOMING SMOKE FREE WITHIN NEW ZEALAND SERVICES. KEY INFORMANTS, INCLUDING STA…	UNIV AUCKLAND, CTR TOBACCO CONTROL RES, SCH POPULAT HLTH, AUCKLAND 1072, NEW ZEALAND.; UNIV AUCKLAND, NATL INST HLTH INNOVAT, SCH POPULAT HLTH, AUCKLAND 1072, NEW ZEALAND.; AUCKLAND UNIV TECHNOL, SCH PUBL HLTH & PSYCHOSOCIAL STUDIES, AUCKLAND, NEW ZEALAND.; GLOBAL PUBL HLTH, GLENORCHY, NEW ZEALAND.; UNIV CANTERBURY, HLTH SCI CTR, CHRISTCHURCH 1, NEW ZEALAND.; QUEEN MARY UNIV LONDON, WOLFSON INST …	SMOKE FREE; SMOKING CESSATION; TOBACCO USE; MENTAL HEALTH AND DRUG AND ALCOHOL SERVICE	10.1111/inm.12035	ARTICLE	TOBACCO; DISORDERS; BANS	INT J MENT HEALTH NU	INT. J. MENT. HEALTH NURS.	ENGLISH	WILEY	2014	GLOVER, M (CORRESPONDING AUTHOR), UNIV AUCKLAND, CTR TOBACCO CONTROL RES, SCH POPULAT HLTH, BLDG 730,GATE 1,261 MORRIN RD, AUCKLAND 1072, NEW ZEALAND.	1445-8330	INTERNATIONAL JOURNAL OF MENTAL HEALTH NURSING	12	TRANSITION TO A SMOKEFREE CULTURE WITHIN MENTAL HEALTH AND DRUG AND ALCOHOL SERVICES A SURVEY OF KEY STAKEHOLDERS	23	ISI	UNIVERSITY OF AUCKLAND; UNIVERSITY OF AUCKLAND; AUCKLAND UNIVERSITY OF TECHNOLOGY; UNIVERSITY OF CANTERBURY; UNIVERSITY OF LONDON; QUEEN MARY UNIVERSITY LONDON	UNIV AUCKLAND	GLOVER M, 2014, INT J MENT HEALTH NU	GLOVER M, 2014, INT J MENT HEALTH NU
WRIGHT B;CARLSON E;BARLOW M;FLORES M;SPAIN D;L? C B	ALEGR?A M, 2018, CURR PSYCHIAT REP, V20, DOI 10.1007/S11920-018-0969-9;ANDERSON ES, 2016, WEST J EMERG MED, V17, P487, DOI 10.5811/WESTJEM.2016.5.30240;ANONYMOUS, 2022, SOCIAL DETERMINANTS;ANONYMOUS, 2014, ROAD RESILIENCE;AUGUSTINE JJ, 2019, AMERICAN COLLEGE OF EMERGENCY PHYSICIANS (ACEP) NOW, V38, P1;AYALON L, 2011, AGING MENT HEALTH, V15, P587, DOI 10.1080/13607863.2010.543664;BHUTTA N., 2020, …	RESEARCH HAS ESTABLISHED RELATIONSHIPS BETWEEN SOCIAL DETERMINANTS OF HEALTH (SDOH) AND MENTAL HEALTH, WITH MIXED FINDINGS ON WHICH ETHNORACIAL GROUPS ARE MOST VULNERABLE TO DELETERIOUS OUTCOMES. THE CURRENT STUDY EXAMINES ETHNORACIAL DIFFERENCES IN SDOH AND THEIR ASSOCIATIONS WITH ACUTE MENTAL HEALTH SYMPTOMS AMONG PATIENTS HOSPITALIZED AFTER EMERGENCY CARE. USING DATA COLLECTED IN A MULTI- SITE…	UNIV OREGON, DEPT PSYCHOL, EUGENE, OR USA.; RAND, DEPT BEHAV & POLICY SCI, SANTA MONICA, CA USA.; CAMBRIDGE HLTH ALLIANCE, CAMBRIDGE, MA USA.; VA PALO ALTO HLTH CARE SYST, NATL CTR POSTTRAUMAT STRESS DISORDER, DISSEMINAT & TRAINING DIV, MENLO PK, CA USA.; STANFORD UNIV, SCH MED, DEPT PSYCHIAT & BEHAV SCI, STANFORD, CA USA.; HARVARD MED SCH, DEPT PSYCHIAT, BOSTON, MA USA.; STANFORD UNIV, SCH MED, …	SOCIAL DETERMINANTS OF HEALTH; ETHNORACIAL IDENTITY; MENTAL HEALTH		ARTICLE	SOCIOECONOMIC-STATUS; DISORDER; DISCRIMINATION; RACE	J HEALTH CARE POOR U	J. HEALTH CARE POOR UNDERSERVED	ENGLISH	JOHNS HOPKINS UNIV PRESS	2024	WRIGHT, B (CORRESPONDING AUTHOR), 1227 UNIV OREGON,1451 ONYX ST, EUGENE, OR 97403 USA.	1049-2089	JOURNAL OF HEALTH CARE FOR THE POOR AND UNDERSERVED	0	ETHNORACIAL DIFFERENCES IN SOCIAL DETERMINANTS OF HEALTH AND ACUTE MENTAL HEALTH SYMPTOMS AMONG ADULTS HOSPITALIZED AFTER EMERGENCY CARE	35	ISI	UNIVERSITY OF OREGON; RAND CORPORATION; HARVARD UNIVERSITY; CAMBRIDGE HEALTH ALLIANCE; US DEPARTMENT OF VETERANS AFFAIRS; VETERANS HEALTH ADMINISTRATION (VHA); VA PALO ALTO HEALTH CARE SYSTEM; STANFORD UNIVERSITY; HARVARD UNIVERSITY; HARVARD MEDICAL SCHOOL; STANFORD UNIVERSITY	NOTDECLARED	WRIGHT B, 2024, J HEALTH CARE POOR U	WRIGHT B, 2024, J HEALTH CARE POOR U
KONG F;XU L;KONG M;LI S;ZHOU C;LI J;SUN L;QIN W	ANONYMOUS, 2017, WORLD POPULATION PRO, DOI DOI 10.1017/CBO9781107415324.004;ANONYMOUS, 2017, WORLD ECONOMIC OUTLOOK DATABASE;ANONYMOUS, 2017, WORLD POP PROSP 2017;BENTLER PM, 1990, PSYCHOL BULL, V107, P238, DOI 10.1037/0033-2909.107.2.238;BERKMAN CS, 1998, J AGING HEALTH, V10, P81, DOI 10.1177/089826439801000105;BRANE G, 1989, INT J GERIATR PSYCH, V4, P165, DOI 10.1002/GPS.930040308;CHEN FF, 2005…	THIS STUDY AIMS TO CLARIFY THE ASSOCIATION BETWEEN SOCIOECONOMIC STATUS (SES), MENTAL HEALTH, AND THE NEED FOR LONG-TERM SERVICES AND SUPPORT (NLTSS) OF THE CHINESE ELDERLY, AND FURTHER, TO PROVIDE EVIDENCE-BASED SUGGESTIONS FOR THE DEVELOPMENT OF THE LONG-TERM SERVICES AND SUPPORT (LTSS) SYSTEM IN CHINA. A CROSS-SECTIONAL SURVEY USING A MULTI-STAGE RANDOM SAMPLING METHOD WAS CONDUCTED IN SHANDON…	SHANDONG UNIV, SCH PUBL HLTH, KEY LAB HLTH ECON & POLICY RES, 44WENHUAXI RD, JINAN 250012, SHANDONG, PEOPLES R CHINA.; FUDAN UNIV, SCH PUBL HLTH, COLLABORAT INNOVAT CTR SOCIAL RISKS GOVERNANCE HL, SHANGHAI 200032, PEOPLES R CHINA.; BEIJING NORMAL UNIV, RES CTR ECON & RESOURCE MANAGEMENT, BEIJING 100875, PEOPLES R CHINA.;	SOCIOECONOMIC STATUS; MENTAL HEALTH; NEED FOR LONG-TERM SERVICES AND SUPPORT; CHINESE ELDERLY; STRUCTURAL EQUATION MODELING	10.3390/ijerph16040526	ARTICLE	OF-FIT INDEXES; OLDER-ADULTS; HOME-CARE; ASSOCIATION; DISORDERS; INCOME; DETERMINANTS; DEPRESSION; MORTALITY; QUALITY	INT J ENV RES PUB HE	INT. J. ENVIRON. RES. PUBLIC HEALTH	ENGLISH	MDPI	2019	XU, LZ (CORRESPONDING AUTHOR), SHANDONG UNIV, SCH PUBL HLTH, KEY LAB HLTH ECON & POLICY RES, 44WENHUAXI RD, JINAN 250012, SHANDONG, PEOPLES R CHINA.; XU, LZ (CORRESPONDING AUTHOR), FUDAN UNIV, SCH PUBL HLTH, COLLABORAT INNOVAT CTR SOCIAL RISKS GOVERNANCE HL, SHANGHAI 200032, PEOPLES R CHINA.		INTERNATIONAL JOURNAL OF ENVIRONMENTAL RESEARCH AND PUBLIC HEALTH	21	THE RELATIONSHIP BETWEEN SOCIOECONOMIC STATUS MENTAL HEALTH AND NEED FOR LONGTERM SERVICES AND SUPPORTS AMONG THE CHINESE ELDERLY IN SHANDONG PROVINCEA CROSSSECTIONAL STUDY	16	ISI	SHANDONG UNIVERSITY; FUDAN UNIVERSITY; BEIJING NORMAL UNIVERSITY	SHANDONG UNIV;FUDAN UNIV	KONG FL, 2019, INT J ENV RES PUB HE	KONG FL, 2019, INT J ENV RES PUB HE
SCOTT K;HWANG I;CHIU W;KESSLER R;SAMPSON N;ANGERMEYER M;BEAUTRAIS A;BORGES G;BRUFFAERTS R;DE G R;FLORESCU S;FUKAO A;HARO J;HU C;KOVESS V;LEVINSON D;POSADA-VILLA J;SCOCCO P;NOCK M	ALDENKAMP AP, 1999, EPILEPSIA, V40, P94;ANONYMOUS, 1994, VITAL HEALTH STAT 2, P1;ANONYMOUS, SUDAAN SOFTW STAT AN;ANONYMOUS, 1997, COGNITIVE PSYCHOLOGY AND THE EMOTIONAL DISORDERS;ANONYMOUS, INT HDB SUICIDE ATTE;ANONYMOUS, 2008, WHO WORLD MENTAL HLT;BARRY JJ, 2005, EPILEPSY BEHAV, V6, P520, DOI 10.1016/J.YEBEH.2005.03.017;BAUMEISTER H, 2010, J CLIN EPIDEMIOL, V63, P558, DOI 10.1016/J.JCLINEPI.2009…	OBJECTIVE: TO INVESTIGATE THE ASSOCIATION OF A RANGE OF TEMPORALLY PRIOR PHYSICAL CONDITIONS WITH THE SUBSEQUENT FIRST ONSET OF SUICIDAL IDEATION, PLANS, AND ATTEMPTS IN LARGE, GENERAL POPULATION, CROSS-NATIONAL SAMPLE. THE ASSOCIATIONS BETWEEN PHYSICAL CONDITIONS AND SUICIDAL BEHAVIOR REMAIN UNCLEAR DUE TO SPARSE DATA AND VARIED METHODOLOGY. METHODS: PREDICTIVE ASSOCIATIONS BETWEEN 13 TEMPORALLY…	UNIV OTAGO, DEPT PSYCHOL MED, SCH MED & HLTH SCI, WELLINGTON, NEW ZEALAND.; HARVARD UNIV, SCH MED, DEPT HLTH CARE POLICY, BOSTON, MA 02115 USA.; CTR PUBL MENTAL HLTH, GOSING AM WAGRAM, AUSTRIA.; UNIV OTAGO, DEPT PSYCHOL MED, CHRISTCHURCH, NEW ZEALAND.; NATL INST PSYCHIAT, DEPT EPIDEMIOL RES, MEXICO CITY, DF, MEXICO.; METROPOLITAN AUTONOMOUS UNIV, MEXICO CITY, DF, MEXICO.; UNIV HOSP GASTHUISBERG, …	SUICIDAL BEHAVIOR; PHYSICAL CONDITIONS; MENTAL DISORDERS	10.1097/PSY.0b013e3181e3333d	ARTICLE	DEPRESSION; ILLNESS; COMORBIDITY; IDEATION; PREVALENCE; DISORDERS; EPILEPSY; PEOPLE; ADULTS; RISK	PSYCHOSOM MED	PSYCHOSOM. MED.	ENGLISH	LIPPINCOTT WILLIAMS & WILKINS	2010	SCOTT, KM (CORRESPONDING AUTHOR), WELLINGTON SCH MED & HLTH SCI, DEPT PSYCHOL MED, MEIN ST, WELLINGTON, NEW ZEALAND.	0033-3174	PSYCHOSOMATIC MEDICINE	161	CHRONIC PHYSICAL CONDITIONS AND THEIR ASSOCIATION WITH FIRST ONSET OF SUICIDAL BEHAVIOR IN THE WORLD MENTAL HEALTH SURVEYS	72	ISI	UNIVERSITY OF OTAGO; HARVARD UNIVERSITY; HARVARD MEDICAL SCHOOL; UNIVERSITY OF OTAGO; INSTITUTO NACIONAL DE PSIQUIATRIA RAMON DE LA FUENTE MUNIZ; UNIVERSIDAD AUTONOMA METROPOLITANA - MEXICO; KU LEUVEN; UNIVERSITY HOSPITAL LEUVEN; TRIMBOS INSTITUTE; YAMAGATA UNIVERSITY; CIBER - CENTRO DE INVESTIGACION BIOMEDICA EN RED; CIBERSAM; SHENZHEN INSTITUTE OF MENTAL HEALTH AND SHENZHEN KANGNING HOSPITAL; U…	WELLINGTON SCH MED AND HLTH SCI	SCOTT KM, 2010, PSYCHOSOM MED	SCOTT KM, 2010, PSYCHOSOM MED
HOISINGTON A;STEARNS-YODER K;KOVACS E;POSTOLACHE T;BRENNER L	ADLER NE, 1994, AM PSYCHOL, V49, P15, DOI 10.1037/0003-066X.49.1.15;ALAVANJA MCR, 2004, ANNU REV PUBL HEALTH, V25, P155, DOI 10.1146/ANNUREV.PUBLHEALTH.25.101802.123020;ALLEN JL, 2017, NEUROTOXICOLOGY, V59, P140, DOI 10.1016/J.NEURO.2015.12.014;ANONYMOUS, 2012, REDUCING URBAN HEAT ISLANDS: COMPENDIUM OF STRATEGIES, P1;ANONYMOUS, 2021, NATIONAL EMISSIONS REPORTED TO THE UNFCCC AND TO THE EU GREENH…	PURPOSE OF REVIEWINHALATION OF AIRBORNE POLLUTANTS IN THE NATURAL AND BUILT ENVIRONMENT IS UBIQUITOUS; YET, EXPOSURES ARE DIFFERENT ACROSS A LIFESPAN AND UNIQUE TO INDIVIDUALS. HERE, WE REVIEWED THE CONNECTIONS BETWEEN MENTAL HEALTH OUTCOMES FROM AIRBORNE POLLUTANT EXPOSURES, THE BIOLOGICAL INFLAMMATORY MECHANISMS, AND PROVIDE FUTURE DIRECTIONS FOR RESEARCHERS AND POLICY MAKERS. THE CURRENT STATE…	ROCKY MT REG VET AFFAIRS MED CTR RMR VAMC, VET AFFAIRS ROCKY MT MENTAL ILLNESS RES EDUC & CLI, AURORA, CO 80045 USA.; MIL & VET MICROBIOME CONSORTIUM RES & EDUC MVM COR, AURORA, CO 80045 USA.; UNIV COLORADO, DEPT PHYS MED & REHABIL, ANSCHUTZ MED CAMPUS, AURORA, CO 80045 USA.; AIR FORCE INST TECHNOL, DEPT SYST ENGN & MANAGEMENT, DAYTON, OH 45433 USA.; UNIV COLORADO, DEPT SURG, DIV GI TRAUMA & ENDO…	AIRBORNE EXPOSURE; MENTAL HEALTH; PARTICULATE MATTER; BURN PIT; PESTICIDES; JET FUEL; AEROALLERGENS; POLLUTANTS	10.1007/s40572-024-00437-8	REVIEW	AMBIENT AIR-POLLUTION; POSTTRAUMATIC-STRESS-DISORDER; LOW-GRADE INFLAMMATION; OXIDATIVE STRESS; SOCIOECONOMIC-STATUS; JET FUEL; DEPRESSIVE SYMPTOMS; PARTICULATE MATTER; PESTICIDE EXPOSURE; MANGANESE EXPOSURE	CURR ENV HLTH REP	CURR. ENVIRON. HEALTH REP.	ENGLISH	SPRINGERNATURE	2024	HOISINGTON, AJ (CORRESPONDING AUTHOR), ROCKY MT REG VET AFFAIRS MED CTR RMR VAMC, VET AFFAIRS ROCKY MT MENTAL ILLNESS RES EDUC & CLI, AURORA, CO 80045 USA.; HOISINGTON, AJ (CORRESPONDING AUTHOR), MIL & VET MICROBIOME CONSORTIUM RES & EDUC MVM COR, AURORA, CO 80045 USA.; HOISINGTON, AJ (CORRESPONDING AUTHOR), UNIV COLORADO, DEPT PHYS MED & REHABIL, ANSCHUTZ MED CAMPUS, AURORA, CO 80045 USA.; HOISI…		CURRENT ENVIRONMENTAL HEALTH REPORTS	3	AIRBORNE EXPOSURE TO POLLUTANTS AND MENTAL HEALTH A REVIEW WITH IMPLICATIONS FOR UNITED STATES VETERANS	11	ISI	UNIVERSITY OF COLORADO SYSTEM; UNIVERSITY OF COLORADO ANSCHUTZ MEDICAL CAMPUS; AIR FORCE INSTITUTE OF TECHNOLOGY (AFIT); UNIVERSITY OF COLORADO SYSTEM; UNIVERSITY OF COLORADO ANSCHUTZ MEDICAL CAMPUS; UNIVERSITY OF COLORADO SYSTEM; UNIVERSITY OF COLORADO ANSCHUTZ MEDICAL CAMPUS; UNIVERSITY SYSTEM OF MARYLAND; UNIVERSITY OF MARYLAND BALTIMORE; UNIVERSITY OF COLORADO SYSTEM; UNIVERSITY OF COLORADO A…	ROCKY MT REG VET AFFAIRS MED CTR RMR VAMC;AJ (CORRESPONDING AUTHOR);UNIV COLORADO;AIR FORCE INST TECHNOL	HOISINGTON AJ, 2024, CURR ENV HLTH REP	HOISINGTON AJ, 2024, CURR ENV HLTH REP
GOLBERSTEIN E;EISENBERG D;GOLLUST S	ANONYMOUS, PUB DEP HLTH HUM SER;ANONYMOUS, MENT HLTH REP SURG G;CORRIGAN P, 2004, AM PSYCHOL, V59, P614, DOI 10.1037/0003-066X.59.7.614;EISENBERG D, 2007, MED CARE, V45, P594, DOI 10.1097/MLR.0B013E31803BB4C1;JORM AF, 2000, AUST NZ J PSYCHIAT, V34, P612, DOI 10.1080/J.1440-1614.2000.00743.X;KESSLER RC, 2005, ARCH GEN PSYCHIAT, V62, P593, DOI 10.1001/ARCHPSYC.62.6.593;KESSLER RC, 2001, HEALTH SERV…	OBJECTIVE: THERE IS LIMITED EMPIRICAL EVIDENCE ON THE EXTENT TO WHICH PERCEIVED PUBLIC STIGMA PREVENTS INDIVIDUALS FROM USING MENTAL HEALTH SERVICES, DESPITE SUBSTANTIAL RECENT POLICY INTEREST IN THIS ISSUE. THIS STUDY INVESTIGATED ASSOCIATIONS BETWEEN PERCEIVED PUBLIC STIGMA AND MENTAL HEALTH CARE SEEKING. METHODS: THIS STUDY USED CROSS- SECTIONAL SURVEY DATA FROM A REPRESENTATIVE SAMPLE OF UNDE…	UNIV MICHIGAN, SCH PUBL HLTH, DEPT HLTH MANAGEMENT & POLICY, ANN ARBOR, MI 48109 USA.;		10.1176/appi.ps.59.4.392	ARTICLE	COMORBIDITY SURVEY REPLICATION; HELP-SEEKING; PSYCHIATRIC-SYMPTOMS; COLLEGE-STUDENTS; SPECIAL SECTION; ILLNESS; DEPRESSION; DISORDERS; ATTITUDES; PREVALENCE	PSYCHIAT SERV	PSYCHIATR. SERV.	ENGLISH	AMER PSYCHIATRIC PUBLISHING, INC	2008	GOLBERSTEIN, E (CORRESPONDING AUTHOR), UNIV MICHIGAN, SCH PUBL HLTH, DEPT HLTH MANAGEMENT & POLICY, 109 S OBSERV, ANN ARBOR, MI 48109 USA.	1075-2730	PSYCHIATRIC SERVICES	181	PERCEIVED STIGMA AND MENTAL HEALTH CARE SEEKING	59	ISI	UNIVERSITY OF MICHIGAN SYSTEM; UNIVERSITY OF MICHIGAN	UNIV MICHIGAN	GOLBERSTEIN E, 2008, PSYCHIAT SERV	GOLBERSTEIN E, 2008, PSYCHIAT SERV
OLMOS-OCHOA T;NIV N;HELLEMANN G;COHEN A;OBERMAN R;GOLDBERG R;YOUNG A	ABOLHASSANI SHAHLA, 2012, IRAN J NURS MIDWIFERY RES, V17, P205;ALLISON DB, 2009, AM J PREV MED, V36, P341, DOI 10.1016/J.AMEPRE.2008.11.020;ARCHIE S, 2003, CAN J PSYCHIAT, V48, P628, DOI 10.1177/070674370304800910;BASSILIOS B, 2014, AUSTRALAS PSYCHIATRY, V22, P71, DOI 10.1177/1039856213510575;BENNETT GG, 2010, OBESITY, V18, P308, DOI 10.1038/OBY.2009.242;BONFIOLI E, 2012, BMC PSYCHIATRY, V12, DOI…	OBJECTIVE: THIS STUDY EXAMINES HARRIERS TO PARTICIPATION AND RETENTION IN 2 MODALITIES (WEB-BASED AND IN-PERSON) OF A WEIGHT-MANAGEMENT INTERVENTION TAILORED FOR INDIVIDUALS WITH SERIOUS MENTAL ILLNESS (SMI). METHOD: USING A MIXED-METHODS APPROACH, WE EXPLORED THE BARRIERS VETERANS WITH SMI FACE WHEN PARTICIPATING IN A WEB-BASED (WEBMOVE) OR IN-PERSON (MOVE-SMI) VERSION OF THE SAME SMI-ADAPTED MO…	VET AFFAIRS DESERT PACIFIC MENTAL ILLNESS RES EDU, LONG BEACH, CA USA.; UNIV CALIF LOS ANGELES, DEPT PSYCHIAT & BIOBEHAV SCI, LOS ANGELES, CA 90024 USA.; VA GREATER LOS ANGELES HEALTHCARE SYST, LOS ANGELES, CA USA.; VA CAPITOL HEALTHCARE NETWORK MENTAL ILLNESS RES, BALTIMORE, MD USA.; UNIV MARYLAND, SCH MED, DEPT PSYCHIAT, DIV PSYCHIAT SERV RES, BALTIMORE, MD 21201 USA.; VA GREATER LOS ANGELES HE…	MENTAL ILLNESS; OBESITY; QUALITATIVE METHODS; E-HEALTH; WEIGHT LOSS	10.1037/prj0000363	ARTICLE	LIFE-STYLE INTERVENTIONS; PHYSICAL-ACTIVITY; PERCEIVED BARRIERS; ADULTS; PEOPLE; SCHIZOPHRENIA; DISORDERS; VETERANS; OBESITY; INDIVIDUALS	PSYCHIATR REHABIL J	PSYCHIATR. REHABIL. J.	ENGLISH	EDUCATIONAL PUBLISHING FOUNDATION-AMERICAN PSYCHOLOGICAL ASSOC	2019	OLMOS-OCHOA, TT (CORRESPONDING AUTHOR), VA GREATER LOS ANGELES HEALTHCARE SYST, HSR&D CTR STUDY HEALTHCARE INNOVAT IMPLEMENTAT &, 16111 PLUMMER ST 152, NORTH HILLS, CA 91343 USA.	1095-158X	PSYCHIATRIC REHABILITATION JOURNAL	12	BARRIERS TO PARTICIPATION IN WEBBASED AND INPERSON WEIGHT MANAGEMENT INTERVENTIONS FOR SERIOUS MENTAL ILLNESS	42	ISI	UNIVERSITY OF CALIFORNIA SYSTEM; UNIVERSITY OF CALIFORNIA LOS ANGELES; US DEPARTMENT OF VETERANS AFFAIRS; VETERANS HEALTH ADMINISTRATION (VHA); VA GREATER LOS ANGELES HEALTHCARE SYSTEM; UNIVERSITY SYSTEM OF MARYLAND; UNIVERSITY OF MARYLAND BALTIMORE; US DEPARTMENT OF VETERANS AFFAIRS; VETERANS HEALTH ADMINISTRATION (VHA); VA GREATER LOS ANGELES HEALTHCARE SYSTEM	HSRANDD CTR STUDY HEALTHCARE INNOVAT IMPLEMENTAT AND	OLMOS-OCHOA TT, 2019, PSYCHIATR REHABIL J	OLMOS-OCHOA TT, 2019, PSYCHIATR REHABIL J
BAIK S;SHIN K;FITZSIMMONS-CRAFT E;EISENBERG D;WILFLEY D;TAYLOR C;NEWMAN M	AMERICAN PSYCHIATRIC ASSOCIATION, 2013, DIAGNOSTIC STAT MANU, DOI 10.1176/APPI.BOOKS.9780890425596, DOI 10.1176/APPI.BOOKS.9780890425596;ANGERMEYER M.C., 2006, QUALITY LIFE MENTAL, P21;ANONYMOUS, 2015, AM COLL HLTH ASSOCIA;ARNOLD LM, 2000, J AFFECT DISORDERS, V57, P235, DOI 10.1016/S0165-0327(99)00042-7;BAIANO M, 2014, BMC PSYCHIATRY, V14, DOI 10.1186/1471-244X-14-165;BARRERA TL, 2009, J ANXIETY …	BACKGROUND: PREVIOUS STUDIES SHOWED THAT COMORBIDITY AND DEMOGRAPHIC FACTORS ADDED TO BURDEN ON HEALTHRELATED QUALITY OF LIFE (HRQOL). ONLY ONE STUDY EXPLORED THE RELATIONSHIP BETWEEN HRQOL AND COMORBIDITY IN COLLEGE STUDENTS WITH MENTAL DISORDERS, LEAVING GENERALIZABILITY OF FINDINGS UNCERTAIN. LESS IS KNOWN ABOUT THE ASSOCIATION OF DEMOGRAPHICS ON HRQOL. THIS STUDY INVESTIGATED HRQOL BASED ON D…	PENN STATE UNIV, DEPT PSYCHOL, 378 MOORE BLDG, UNIVERSITY PK, PA 16802 USA.; LONG ISL UNIV, DEPT BEHAV SCI, POST CAMPUS, BROOKVILLE, NY USA.; WASHINGTON UNIV, DEPT PSYCHIAT, SCH MED, ST LOUIS, MO USA.; WASHINGTON UNIV ST LOUIS, DEPT PSYCHOL & BRAIN SCI, ST.; LOUIS, MO USA.; UNIV CALIF LOS ANGELES, DEPT HLTH POLICY & MANAGEMENT, LOS ANGELES, CA USA.; STANFORD UNIV, SCH MED, DEPT PSYCHIAT & BEHAV S…	QUALITY OF LIFE; COLLEGE STUDENTS; MENTAL DISORDER; COMORBIDITY; MENTAL HEALTH; PHYSICAL HEALTH	10.1016/j.jad.2024.08.098	ARTICLE	FORM HEALTH SURVEY; REPORT DIAGNOSTIC MEASURE; SELF-REPORT; UNIVERSITY-STUDENTS; SOCIAL PHOBIA; SURVEY SF-36; RELIABILITY; VALIDITY; QUESTIONNAIRE; IMPAIRMENT	J AFFECT DISORDERS	J. AFFECT. DISORD.	ENGLISH	ELSEVIER	2024	BAIK, SY (CORRESPONDING AUTHOR), PENN STATE UNIV, DEPT PSYCHOL, 378 MOORE BLDG, UNIVERSITY PK, PA 16802 USA.	0165-0327	JOURNAL OF AFFECTIVE DISORDERS	0	THE RELATIONSHIP OF RACE ETHNICITY GENDER IDENTITY SEX ASSIGNED AT BIRTH SEXUAL ORIENTATION PARENTAL EDUCATION FINANCIAL HARDSHIP AND COMORBID MENTAL DISORDERS WITH QUALITY OF LIFE IN COLLEGE STUDENTS WITH ANXIETY DEPRESSION OR EATING DISORDERS	366	ISI	PENNSYLVANIA COMMONWEALTH SYSTEM OF HIGHER EDUCATION (PCSHE); PENNSYLVANIA STATE UNIVERSITY; PENNSYLVANIA STATE UNIVERSITY -UNIVERSITY PARK; LONG ISLAND UNIVERSITY POST; WASHINGTON UNIVERSITY (WUSTL); WASHINGTON UNIVERSITY (WUSTL); UNIVERSITY OF CALIFORNIA SYSTEM; UNIVERSITY OF CALIFORNIA LOS ANGELES; STANFORD UNIVERSITY	PENN STATE UNIV	BAIK SY, 2024, J AFFECT DISORDERS	BAIK SY, 2024, J AFFECT DISORDERS
CUMMINGS J;ALLEN L;CLENNON J;JI X;DRUSS B	ANONYMOUS, 2013, STATA VERSION 13 1;ANONYMOUS, 2017, NY TIMES;BARRY CL, 2016, HEALTH AFFAIR, V35, P1009, DOI 10.1377/HLTHAFF.2015.1653;BERONIO K, 2014, J BEHAV HEALTH SER R, V41, P410, DOI 10.1007/S11414-014-9412-0;BISHOP TF, 2014, JAMA PSYCHIAT, V71, P176, DOI 10.1001/JAMAPSYCHIATRY.2013.2862;CUMMINGS JR, 2016, ADM POLICY MENT HLTH, V43, P717, DOI 10.1007/S10488-015-0685-2;CUMMINGS JR, 2015, JAM…	IMPORTANCE WITH THE FUTURE OF THE AFFORDABLE CARE ACT AND MEDICAID PROGRAM UNCLEAR, IT IS CRITICAL TO EXAMINE THE GEOGRAPHIC AVAILABILITY OF SPECIALTY MENTAL HEALTH TREATMENT RESOURCES THAT SERVE LOW-INCOME POPULATIONS ACROSS LOCAL COMMUNITIES. OBJECTIVES TO EXAMINE THE GEOGRAPHIC AVAILABILITY OF COMMUNITY-BASED SPECIALTY MENTAL HEALTH TREATMENT RESOURCES AND HOW THESE RESOURCES ARE DISTRIBUTED B…	EMORY UNIV, ROLLINS SCH PUBL HLTH, DEPT HLTH POLICY & MANAGEMENT, 1518 CLIFTON RD NE,ROOM 650, ATLANTA, GA 30322 USA.; EMORY UNIV, ROLLINS SCH PUBL HLTH, DEPT BIOSTAT, ATLANTA, GA 30322 USA.;		10.1001/jamapsychiatry.2017.0303	ARTICLE	UNITED-STATES; INSURANCE; PSYCHIATRISTS; DISORDER; SERVICES; PARITY; NEED	JAMA PSYCHIAT	JAMA PSYCHIATRY	ENGLISH	AMER MEDICAL ASSOC	2017	CUMMINGS, JR (CORRESPONDING AUTHOR), EMORY UNIV, ROLLINS SCH PUBL HLTH, DEPT HLTH POLICY & MANAGEMENT, 1518 CLIFTON RD NE,ROOM 650, ATLANTA, GA 30322 USA.	2168-622X	JAMA PSYCHIATRY	100	GEOGRAPHIC ACCESS TO SPECIALTY MENTAL HEALTH CARE ACROSS HIGH AND LOWINCOME US COMMUNITIES	74	ISI	EMORY UNIVERSITY; ROLLINS SCHOOL PUBLIC HEALTH; EMORY UNIVERSITY; ROLLINS SCHOOL PUBLIC HEALTH	EMORY UNIV	CUMMINGS JR, 2017, JAMA PSYCHIAT	CUMMINGS JR, 2017, JAMA PSYCHIAT
PIRKOLA S;SUND R;SAILAS E;WAHLBECK K	APPLEBY L, 1999, BRIT J PSYCHIAT, V175, P168, DOI 10.1192/BJP.175.2.168;APPLEBY L, 1992, BRIT J PSYCHIAT, V161, P749, DOI 10.1192/BJP.161.6.749;BEAUTRAIS AL, 1998, PSYCHOL MED, V28, P209, DOI 10.1017/S0033291797005990;BEECHAM J, 2000, ACTA PSYCHIAT SCAND, V102, P33, DOI 10.1111/J.0902-4441.2000.T01-1-ACP28DASH02.X;BERK M, 2006, PSYCHOL MED, V36, P181, DOI 10.1017/S0033291705006665;BLAKELY TA, 200…	BACKGROUND IN MANY COUNTRIES, PSYCHIATRIC SERVICES HAVE BEEN REFORMED BY REDUCING THE SIZE OF HOSPITALS AND DEVELOPING COMMUNITY MENTAL-HEALTH SERVICES. WE INVESTIGATED THIS REFORM BY ASSESSING THE RELATION BETWEEN SUICIDE RISK AND DIFFERENT WAYS OF ORGANISING RNENTAL-HEALTH SERVICES. METHODS WE DID A NATIONWIDE COMPREHENSIVE SURVEY OF FINNISH ADULT MENTAL-HEALTH SERVICE UNITS BETWEEN SEPT 1, 200…	UNIV HELSINKI, CENT HOSP, DEPT PSYCHIAT, FIN-00029 HELSINKI, FINLAND.; NATL RES & DEV CTR WELF & HLTH STAKES, MENTAL HLTH GRP, HELSINKI, FINLAND.; STAKES, HLTH SERV & POLICY RES, HELSINKI, FINLAND.; HELSINKI & UUSIMAA HOSP DIST, HELSINKI, FINLAND.; VAASA CENT HOSP, VAASA, FINLAND.;		10.1016/S0140-6736(08)61848-6	ARTICLE	UNITED-STATES; PSYCHOLOGICAL AUTOPSY; ALCOHOL-CONSUMPTION; MAPPING SCHEDULE; RISK; CARE; UNEMPLOYMENT; ASSOCIATION; PREVENTION; DISORDERS	LANCET	LANCET	ENGLISH	ELSEVIER SCIENCE INC	2009	PIRKOLA, S (CORRESPONDING AUTHOR), UNIV HELSINKI, CENT HOSP, DEPT PSYCHIAT, POB 590, FIN-00029 HELSINKI, FINLAND.	0140-6736	LANCET	128	COMMUNITY MENTALHEALTH SERVICES AND SUICIDE RATE IN FINLAND A NATIONWIDE SMALLAREA ANALYSIS	373	ISI	UNIVERSITY OF HELSINKI; HELSINKI UNIVERSITY CENTRAL HOSPITAL; FINLAND NATIONAL INSTITUTE FOR HEALTH AND WELFARE; FINLAND NATIONAL INSTITUTE FOR HEALTH AND WELFARE; VAASA CENTRAL HOSPITAL	UNIV HELSINKI	PIRKOLA S, 2009, LANCET	PIRKOLA S, 2009, LANCET
LAMBREGTS T;VAN V R	ANONYMOUS, ZORGAUTORITEIT NEDER;ANONYMOUS, W21632 NBER;ANONYMOUS, NETHERLANDS I SOCIAL;ANONYMOUS, EXPERT PANEL EFFECTI;ANONYMOUS, OXFORD HDB HLTH EC;ANONYMOUS, 2010, EUROOBSERVER;BIJL RV, 2003, HEALTH AFFAIR, V22, P122, DOI 10.1377/HLTHAFF.22.3.122;BROWN MB, 1974, J AM STAT ASSOC, V69, P364, DOI 10.2307/2285659;DE GRAAF R, 2012, SOC PSYCH PSYCH EPID, V47, P203, DOI 10.1007/S00127-010-0334-8;DRUMM…	EMPIRICAL EVIDENCE SUGGESTS THAT PEOPLE ARE FAIRLY SENSITIVE TO COST SHARING ARRANGEMENTS IN AMBULATORY MENTAL HEALTHCARE. HOWEVER, PURE COST SHARING EFFECTS ARE TYPICALLY HARD TO MEASURE DUE TO THE PRESENCE OF ADVERSE SELECTION EFFECTS. IN THIS PAPER, WE EXAMINE THE IMPACT OF COST SHARING ON MENTAL HEALTHCARE UTILIZATION IN THE CONTEXT OF MANDATORY HEALTH INSURANCE WHERE ADVERSE SELECTION IS ABS…	ERASMUS UNIV, INST HLTH POLICY & MANAGEMENT, BURGEMEESTER OUDLAAN 50, NL-3062 PA ROTTERDAM, NETHERLANDS.;	HEALTH INSURANCE; COST SHARING; COPAYMENTS; HEALTHCARE UTILIZATION; MENTAL HEALTHCARE; NATURAL EXPERIMENT	10.1007/s10198-017-0921-7	ARTICLE	DEMAND; SERVICES; PREVALENCE; DISORDERS	EUR J HEALTH ECON	EUR. J. HEALTH ECON.	ENGLISH	SPRINGER	2018	LAMBREGTS, TR (CORRESPONDING AUTHOR), ERASMUS UNIV, INST HLTH POLICY & MANAGEMENT, BURGEMEESTER OUDLAAN 50, NL-3062 PA ROTTERDAM, NETHERLANDS.	1618-7598	EUROPEAN JOURNAL OF HEALTH ECONOMICS	12	THE IMPACT OF COPAYMENTS ON MENTAL HEALTHCARE UTILIZATION A NATURAL EXPERIMENT	19	ISI	ERASMUS UNIVERSITY ROTTERDAM; ERASMUS UNIVERSITY ROTTERDAM - EXCL ERASMUS MC	ERASMUS UNIV	LAMBREGTS TR, 2018, EUR J HEALTH ECON	LAMBREGTS TR, 2018, EUR J HEALTH ECON
ZHANG Y;ZHAO J;YU Z;ZHANG D;WU S;ZHANG Y;CHEN X;WANG G;ZHANG J;JIANG F	ADEGBOYE D, 2021, JCPP ADV, V1, DOI 10.1111/JCV2.12005;ANME T., 2013, JOURNAL OF PUBLIC HEALTH FRONTIER;ANONYMOUS, 1995, BULL WORLD HEALTH ORGAN, V73, P135;ARMITAGE R, 2020, LANCET GLOB HEALTH, V8, PE644, DOI 10.1016/S2214-109X(20)30116-9;BECKER SP, 2020, J CHILD PSYCHOL PSYC, V61, P757, DOI 10.1111/JCPP.13278;BIDDLE SJH, 2019, PSYCHOL SPORT EXERC, V42, P146, DOI 10.1016/J.PSYCHSPORT.2018.08.011;…	FROM JANUARY 24, 2020, TO MARCH 24, 2020, DURING THE FIRST WAVE OF THE COVID-19 PANDEMIC, SHANGHAI IMPLEMENTED LOCKDOWN MEASURES TO STOP TRANSMISSION OF THE VIRUS. OVER 26 MILLION RESIDENTS, INCLUDING 0.8 MILLION CHILDREN AGED 3-6, WERE CONFINED AT HOME. THE PRESENT STUDY LEVERAGED A CITY-WIDE COHORT STUDY OF PRESCHOOL CHILDREN IN SHANGHAI-THE SHANGHAI CHILDREN'S HEALTH, EDUCATION AND LIFESTYLE E…	SHANGHAI JIAO TONG UNIV, NATL CHILDRENS MED CTR, SHANGHAI CHILDRENS MED CTR, SCH MED,CHILD HLTH ADVOCACY INST, SHANGHAI, PEOPLES R CHINA.; SHANGHAI JIAO TONG UNIV, SHANGHAI CHILDRENS MED CTR, DEPT DEV & BEHAV PEDIAT, NATL CHILDRENS MED CTR,SCH MED, SHANGHAI, PEOPLES R CHINA.; SHANGHAI JIAO TONG UNIV, CLIN RES CTR, SCH MED, SHANGHAI, PEOPLES R CHINA.; SHANGHAI JIAO TONG UNIV, XINHUA HOSP, SHANGHAI…	SHANGHAI; LOCKDOWN; PRESCHOOLERS; MENTAL HEALTH; HOME ENVIRONMENT; LIFESTYLE	10.1016/j.childyouth.2024.107654	ARTICLE	SLEEP HABITS QUESTIONNAIRE; CHILD; INEQUALITIES; DISORDERS	CHILD YOUTH SERV REV	CHILD. YOUTH SERV. REV.	ENGLISH	PERGAMON-ELSEVIER SCIENCE LTD	2024	JIANG, F (CORRESPONDING AUTHOR), SHANGHAI JIAO TONG UNIV, SHANGHAI CHILDRENS MED CTR, DEPT DEV & BEHAV PEDIAT, NATL CHILDRENS MED CTR,SCH MED, SHANGHAI, PEOPLES R CHINA.; ZHANG, J (CORRESPONDING AUTHOR), SHANGHAI JIAO TONG UNIV, XINHUA HOSP, SHANGHAI KEY LAB CHILDRENS ENVIRONM HLTH, MINIST EDUC,SCH MED, SHANGHAI, PEOPLES R CHINA.	0190-7409	CHILDREN AND YOUTH SERVICES REVIEW	0	CHANGES IN HOME ENVIRONMENT LIFESTYLES AND MENTAL HEALTH AMONG PRESCHOOLERS WHO EXPERIENCED LOCKDOWN DURING THE FIRST WAVE OF COVID19 IN SHANGHAI	161	ISI	SHANGHAI JIAO TONG UNIVERSITY; SHANGHAI JIAO TONG UNIVERSITY; SHANGHAI JIAO TONG UNIVERSITY; SHANGHAI JIAO TONG UNIVERSITY; SHANGHAI JIAO TONG UNIVERSITY; NEW YORK UNIVERSITY; YALE UNIVERSITY	SHANGHAI JIAO TONG UNIV;SHANGHAI JIAO TONG UNIV	ZHANG YT, 2024, CHILD YOUTH SERV REV	ZHANG YT, 2024, CHILD YOUTH SERV REV
DURBIN A;MOINEDDIN R;LIN E;STEELE L;GLAZIER R	ADAY L A, 1974, HEALTH SERV RES, V9, P208;ADLER NE, 2002, HEALTH AFFAIR, V21, P60, DOI 10.1377/HLTHAFF.21.2.60;AFIFI M., 2007, SMJ SINGAPORE MEDICAL JOURNAL, V48, P385;ALEGRIA M, 2000, ARCH GEN PSYCHIAT, V57, P383, DOI 10.1001/ARCHPSYC.57.4.383;ALI JS, 2004, CAN J PUBLIC HEALTH, V95, PI9, DOI 10.1007/BF03403659;ALIEVA A., 2010, EDUCATIONAL INEQUALITIES IN EUROPE: PERFORMANCE OF STUDENTS WITH MIGR…	OBJECTIVE: WHILE NEWCOMERS ARE OFTEN DISPROPORTIONATELY CONCENTRATED IN DISADVANTAGED AREAS, LITTLE ATTENTION IS GIVEN TO THE EFFECTS OF IMMIGRANTS' POSTIMMIGRATION CONTEXT ON THEIR MENTAL HEALTH AND CARE USE. INTERSECTIONALITY THEORY SUGGESTS THAT UNDERSTANDING THE FULL IMPACT OF DISADVANTAGE REQUIRES CONSIDERING THE EFFECTS OF INTERACTING FACTORS. THIS STUDY ASSESSED THE INTER-RELATIONSHIP BETW…	UNIV TORONTO, INST HLTH POLICY MANAGEMENT & EVALUAT, RES ASSOCIATE CANADIAN MENTAL HLTH ASSOC, TORONTO BRANCH, TORONTO, ON, CANADA.; UNIV TORONTO, DEPT FAMILY & COMMUNITY MED, TORONTO, ON M5S 1A1, CANADA.; INST CLIN EVALUAT SCI, TORONTO, ON, CANADA.; UNIV TORONTO, DEPT PSYCHIAT, TORONTO, ON, CANADA.; CTR ADDICT & MENTAL HLTH, PROV SYST SUPPORT PROGRAM, TORONTO, ON, CANADA.; ST MICHAELS HOSP, LI K…		10.1136/bmjopen-2014-006690	ARTICLE	UNITED-STATES; SOCIOECONOMIC-STATUS; PSYCHIATRIC ADMISSION; SOCIAL DEPRIVATION; GENDER-DIFFERENCES; DEPRESSION; DISORDERS; DETERMINANTS; RATES; RISK	BMJ OPEN	BMJ OPEN	ENGLISH	BMJ PUBLISHING GROUP	2015	DURBIN, A (CORRESPONDING AUTHOR), UNIV TORONTO, INST HLTH POLICY MANAGEMENT & EVALUAT, RES ASSOCIATE CANADIAN MENTAL HLTH ASSOC, TORONTO BRANCH, TORONTO, ON, CANADA.	2044-6055	BMJ OPEN	36	EXAMINING THE RELATIONSHIP BETWEEN NEIGHBOURHOOD DEPRIVATION AND MENTAL HEALTH SERVICE USE OF IMMIGRANTS IN ONTARIO CANADA A CROSSSECTIONAL STUDY	5	ISI	UNIVERSITY OF TORONTO; UNIVERSITY OF TORONTO; UNIVERSITY OF TORONTO; UNIVERSITY OF TORONTO; UNIVERSITY OF TORONTO; CENTRE FOR ADDICTION AND MENTAL HEALTH - CANADA; UNIVERSITY OF TORONTO; SAINT MICHAELS HOSPITAL TORONTO; LI KA SHING KNOWLEDGE INSTITUTE	UNIV TORONTO	DURBIN A, 2015, BMJ OPEN	DURBIN A, 2015, BMJ OPEN
HARRIS M;KAZDIN A;CHIU W;SAMPSON N;AGUILAR-GAXIOLA S;AL-HAMZAWI A;ALONSO J;ALTWAIJRI Y;ANDRADE L;CARDOSO G;CIA A;FLORESCU S;GUREJE O;HU C;KARAM E;KARAM G;MNEIMNEH Z;NAVARRO-MATEU F;OLADEJI B;O'NEILL S;SCOTT K;SLADE T;TORRES Y;VIGO D;WOJTYNIAK B;ZARKOV Z;ZIV Y;KESSLER R	ALANG SM, 2019, SOC MENT HEALTH, V9, P388, DOI 10.1177/2156869318802341;ANDREWS G, 2004, BRIT J PSYCHIAT, V184, P526, DOI 10.1192/BJP.184.6.526;ANKUTA GY, 1993, PROF PSYCHOL-RES PR, V24, P70, DOI 10.1037/0735-7028.24.1.70;ANONYMOUS, 2016, SAS STAT 14 3 SOFTW;BAI S, 2020, J NEUROL NEUROSUR PS, V91, P21, DOI 10.1136/JNNP-2019-320912;BARR PJ, 2016, BMJ OPEN, V6, DOI 10.1136/BMJOPEN-2015-009585;BARSK…	KEY POINTSQUESTIONWHAT PROPORTION OF PATIENTS WITH DEPRESSION PERCEIVE TREATMENT AS HELPFUL? FINDINGSTHIS STUDY OF 80332 RESPONDENTS SURVEYED IN 16 COUNTRIES FOUND THAT 68.2% OF ADULTS WITH A LIFETIME HISTORY OF DSM-IV MAJOR DEPRESSIVE DISORDER (N=2726) OBTAINED TREATMENT THAT THEY CONSIDERED HELPFUL; OTHER PATIENTS STOPPED SEEKING TREATMENT AFTER EARLY UNHELPFUL TREATMENT. MOST PATIENTS (93.9%) …	HARVARD MED SCH, DEPT HLTH CARE POLICY, 180 LONGWOOD AVE, BOSTON, MA 02115 USA.; UNIV QUEENSLAND, SCH PUBL HLTH, HERSTON, QLD, AUSTRALIA.; QUEENSLAND CTR MENTAL HLTH RES, PK CTR MENTAL HLTH, WACOL, QLD, AUSTRALIA.; YALE UNIV, DEPT PSYCHOL, NEW HAVEN, CT USA.; UC DAVIS HLTH SYST, CTR REDUCING HLTH DISPAR, SACRAMENTO, CA USA.; AL QADISIYA UNIV, COLL MED, DIWANIYA GOVERNORATE, IRAQ.; PARC SALUT MAR,…		10.1001/jamapsychiatry.2020.1107	ARTICLE	1ST ONSET; THERAPEUTIC ALLIANCE; TREATMENT SEEKING; TREATMENT CONTACT; DELAY; ASSESSMENTS; PREVALENCE; OUTCOMES; ANXIETY; CARE	JAMA PSYCHIAT	JAMA PSYCHIATRY	ENGLISH	AMER MEDICAL ASSOC	2020	KESSLER, RC (CORRESPONDING AUTHOR), HARVARD MED SCH, DEPT HLTH CARE POLICY, 180 LONGWOOD AVE, BOSTON, MA 02115 USA.	2168-622X	JAMA PSYCHIATRY	56	FINDINGS FROM WORLD MENTAL HEALTH SURVEYS OF THE PERCEIVED HELPFULNESS OF TREATMENT FOR PATIENTS WITH MAJOR DEPRESSIVE DISORDER	77	ISI	HARVARD UNIVERSITY; HARVARD MEDICAL SCHOOL; UNIVERSITY OF QUEENSLAND; QUEENSLAND CENTRE FOR MENTAL HEALTH RESEARCH; YALE UNIVERSITY; UNIVERSITY OF CALIFORNIA SYSTEM; UNIVERSITY OF CALIFORNIA DAVIS; UNIVERSITY OF AL-QADISIYAH; HOSPITAL DEL MAR RESEARCH INSTITUTE; HOSPITAL DEL MAR; POMPEU FABRA UNIVERSITY; CIBER - CENTRO DE INVESTIGACION BIOMEDICA EN RED; CIBERESP; KING FAISAL SPECIALIST HOSPITAL A…	HARVARD MED SCH	HARRIS MG, 2020, JAMA PSYCHIAT	HARRIS MG, 2020, JAMA PSYCHIAT
BEENACKERS M;DOIRON D;FORTIER I;NOORDZIJ J;REINHARD E;COURTIN E;BOBAK M;CHAIX B;COSTA G;DAPP U;ROUX A;HUISMAN M;GRUNDY E;KROKSTAD S;MARTIKAINEN P;RAINA P;AVENDANO M;VAN L F	ANGRIST JD, 2009, MOSTLY HARMLESS ECONOMETRICS: AN EMPIRICISTS COMPANION, P1;ANONYMOUS, 2017, MENT HLTH ATL;ANONYMOUS, 2022, EUR HLTH ALL DAT HFA;BORUGIAN MJ, 2010, CAN MED ASSOC J, V182, P1197, DOI 10.1503/CMAJ.091540;CHAIX B, 2012, INT J EPIDEMIOL, V41, P1283, DOI 10.1093/IJE/DYR107;DAPP U, 2012, BMC GERIATR, V12, DOI 10.1186/1471-2318-12-35;DOIRON D, 2017, INT J EPIDEMIOL, V46, P1372, DOI 10.1…	BACKGROUND: URBANIZATION AND AGEING HAVE IMPORTANT IMPLICATIONS FOR PUBLIC MENTAL HEALTH AND WELL-BEING. CITIES POSE MAJOR CHALLENGES FOR OLDER CITIZENS, BUT ALSO OFFER OPPORTUNITIES TO DEVELOP, TEST, AND IMPLEMENT POLICIES, SERVICES, INFRASTRUCTURE, AND INTERVENTIONS THAT PROMOTE MENTAL WELL-BEING. THE MINDMAP PROJECT AIMS TO IDENTIFY THE OPPORTUNITIES AND CHALLENGES POSED BY URBAN ENVIRONMENTAL…	UNIV MED CTR ROTTERDAM, DEPT PUBL HLTH, ERASMUS MC, POB 2040, NL-3000 CA ROTTERDAM, NETHERLANDS.; MCGILL UNIV, RES INST, HLTH CTR, MONTREAL, PQ, CANADA.; SWISS TROP & PUBL HLTH INST, BASEL, SWITZERLAND.; UNIV BASEL, BASEL, SWITZERLAND.; KINGS COLL LONDON, DEPT GLOBAL HLTH & SOCIAL MED, LONDON, ENGLAND.; UCL, DEPT EPIDEMIOL & PUBL HLTH, LONDON, ENGLAND.; PIERRE LOUIS INST EPIDEMIOL & PUBL HLTH, IN…	AGEING; MENTAL WELL-BEING; URBAN HEALTH; DATABASE; DATA INTEGRATION; COHORT STUDIES	10.1186/s12889-018-5031-7	ARTICLE	COHORT PROFILE; RISK-FACTORS; HARMONIZATION; DATASHIELD; MORTALITY	BMC PUBLIC HEALTH	BMC PUBLIC HEALTH	ENGLISH	BIOMED CENTRAL LTD	2018	BEENACKERS, MA (CORRESPONDING AUTHOR), UNIV MED CTR ROTTERDAM, DEPT PUBL HLTH, ERASMUS MC, POB 2040, NL-3000 CA ROTTERDAM, NETHERLANDS.	1471-2458	BMC PUBLIC HEALTH	21	MINDMAP ESTABLISHING AN INTEGRATED DATABASE INFRASTRUCTURE FOR RESEARCH IN AGEING MENTAL WELLBEING AND THE URBAN ENVIRONMENT	18	ISI	ERASMUS UNIVERSITY ROTTERDAM; ERASMUS MC; MCGILL UNIVERSITY; UNIVERSITY OF BASEL; SWISS TROPICAL AND PUBLIC HEALTH INSTITUTE; UNIVERSITY OF BASEL; UNIVERSITY OF LONDON; KING'S COLLEGE LONDON; UNIVERSITY OF LONDON; UNIVERSITY COLLEGE LONDON; INSTITUT NATIONAL DE LA SANTE ET DE LA RECHERCHE MEDICALE (INSERM); SORBONNE UNIVERSITE; INSTITUT NATIONAL DE LA SANTE ET DE LA RECHERCHE MEDICALE (INSERM); S…	UNIV MED CTR ROTTERDAM	BEENACKERS MA, 2018, BMC PUBLIC HEALTH	BEENACKERS MA, 2018, BMC PUBLIC HEALTH
KHODYAKOV D;WILLIAMS P;BROMLEY E;CHUNG B;WELLS K	AGENCY FOR HEALTHCARE RESEARCH AND QUALITY, 2013, NAT HEALTHC DISP REP;BAO YH, 2013, J BEHAV HEALTH SER R, V40, P121, DOI 10.1007/S11414-012-9306-Y;BROMLEY E, 2015, AM J PUBLIC HEALTH, V105, P900, DOI 10.2105/AJPH.2014.302403;CHUNG BW, 2014, ANN INTERN MED, V161, PS23, DOI 10.7326/M13-3011;CORBIE-SMITH G, 1999, AM J MED SCI, V317, P5, DOI 10.1097/00000441-199901000-00002;COUNTY OF LOS ANGELES, 20…	THE PROBLEM: DEPRESSION QUALITY IMPROVEMENT (QI) PROGRAMS BASED ON CHRONIC DISEASE MANAGEMENT MODELS HAVE BEEN SHOWN TO IMPROVE DEPRESSION OUTCOMES. NONETHELESS, ACCESS TO AND THE USE OF SUCH PROGRAMS IS LIMITED IN MINORITY, UNDER-RESOURCED COMMUNITIES. PURPOSE: WE REPORT ON THE OUTCOMES OF A DELPHI-BASED CONSENSUS EXERCISE CONDUCTED BY OUR PARTNERSHIP AT A COMMUNITY-WIDE CONFERENCE IN LOS ANGELE…	RAND CORP, SANTA MONICA, CA 90406 USA.; CHARLES DREW UNIV MED & SCI, LOS ANGELES, CA USA.; UNIV CALIF LOS ANGELES, LOS ANGELES, CA USA.; GREATER LOS ANGELES VA HEALTHCARE SYST, LOS ANGELES, CA USA.; CTY LOS ANGELES DEPT MENTAL HLTH, LOS ANGELES, CA USA.;	COMMUNITY ENGAGEMENT; DELPHI; DEPRESSION; LOS ANGELES; MENTAL HEALTH POLICY	10.1353/cpr.2017.0012	ARTICLE	COMPARATIVE EFFECTIVENESS TRIAL; COMORBIDITY SURVEY REPLICATION; COLLABORATIVE CARE; HEALTH; ENGAGEMENT; DISORDERS; METAANALYSIS; OUTCOMES; CLUSTER; MODEL	PROG COMM HLTH PARTN	PROG. COMMUNITY HEALTH PARTNERSH.	ENGLISH	JOHNS HOPKINS UNIV PRESS	2017	KHODYAKOV, D (CORRESPONDING AUTHOR), RAND CORP, SANTA MONICA, CA 90406 USA.	1557-0541	PROGRESS IN COMMUNITY HEALTH PARTNERSHIPS-RESEARCH EDUCATION AND ACTION	1	USING STAKEHOLDER INPUT TO INFORM AN INNOVATIVE RESEARCH AND POLICY INITIATIVE TO IMPROVE DEPRESSION IN SAFETY NET COMMUNITIES	11	ISI	RAND CORPORATION; CHARLES R. DREW UNIVERSITY OF MEDICINE AND SCIENCE; UNIVERSITY OF CALIFORNIA SYSTEM; UNIVERSITY OF CALIFORNIA LOS ANGELES; US DEPARTMENT OF VETERANS AFFAIRS; VETERANS HEALTH ADMINISTRATION (VHA); VA GREATER LOS ANGELES HEALTHCARE SYSTEM	D (CORRESPONDING AUTHOR)	KHODYAKOV D, 2017, PROG COMM HLTH PARTN	KHODYAKOV D, 2017, PROG COMM HLTH PARTN
MARRIE R;O'MAHONY J;MAXWELL C;LING V;YEH E;ARNOLD D;BAR-OR A;BANWELL B	AMANKWAH N, 2017, HEALTH PROMOT CHRON, V37, P37, DOI 10.24095/HPCDP.37.2.02;ARANGO-LASPRILLA J.C., 2010, INTERNATIONAL JOURNAL OF MS CARE, V12, P71, DOI 10.7224/1537-2073-12.2.71, DOI 10.7224/1537-2073-12.2.71;ARONSON KJ, 1997, NEUROLOGY, V48, P74, DOI 10.1212/WNL.48.1.74;BAILEY DB, 2007, MENT RETARD DEV D R, V13, P321, DOI 10.1002/MRDD.20172;BOMAN K, 2003, ACTA ONCOL, V42, P137, DOI 10.1080/0284…	OBJECTIVE WE COMPARED THE PREVALENCE OF PHYSICAL AND MENTAL CONDITIONS AND RATE OF HEALTH CARE UTILIZATION IN MOTHERS OF CHILDREN WITH MULTIPLE SCLEROSIS (MS) (MS-MOTHERS) WITH THAT OF MOTHERS OF CHILDREN WITHOUT MS (NON-MS-MOTHERS). METHODS USING POPULATION-BASED ADMINISTRATIVE DATA FROM ONTARIO, CANADA, WE IDENTIFIED MS-MOTHERS AND NON-MS-MOTHERS, MATCHED ON MATERNAL AGE AT CHILDBIRTH, REGION, …	UNIV MANITOBA, DEPT INTERNAL MED, MAX RADY COLL MED, RADY FAC HLTH SCI, WINNIPEG, MB, CANADA.; UNIV MANITOBA, DEPT COMMUNITY HLTH SCI, MAX RADY COLL MED, RADY FAC HLTH SCI, WINNIPEG, MB, CANADA.; UNIV TORONTO, INST HLTH POLICY MANAGEMENT & EVALUAT, HOSP SICK CHILDREN, TORONTO, ON, CANADA.; UNIV TORONTO, DIV NEUROL NEUROSCI & MENTAL HLTH, SICKKIDS RES INST, HOSP SICK CHILDREN, TORONTO, ON, CANADA.…			ARTICLE	MATERNAL DEPRESSION; ADMINISTRATIVE DATA; CHILDHOOD OBESITY; OFFSPRING ASTHMA; PHYSICAL HEALTH; DISTRESS; FAMILIES; EXPOSURE; ANXIETY; STRESS	NEUROLOGY	NEUROLOGY	ENGLISH	LIPPINCOTT WILLIAMS & WILKINS	2020	MARRIE, RA (CORRESPONDING AUTHOR), UNIV MANITOBA, DEPT INTERNAL MED, MAX RADY COLL MED, RADY FAC HLTH SCI, WINNIPEG, MB, CANADA.; MARRIE, RA (CORRESPONDING AUTHOR), UNIV MANITOBA, DEPT COMMUNITY HLTH SCI, MAX RADY COLL MED, RADY FAC HLTH SCI, WINNIPEG, MB, CANADA.	0028-3878	NEUROLOGY	10	INCREASED MENTAL HEALTH CARE USE BY MOTHERS OF CHILDREN WITH MULTIPLE SCLEROSIS	94	ISI	UNIVERSITY OF MANITOBA; UNIVERSITY OF MANITOBA; UNIVERSITY OF TORONTO; HOSPITAL FOR SICK CHILDREN (SICKKIDS); UNIVERSITY OF TORONTO; HOSPITAL FOR SICK CHILDREN (SICKKIDS); UNIVERSITY OF WATERLOO; UNIVERSITY OF WATERLOO; UNIVERSITY OF TORONTO; UNIVERSITY OF TORONTO; MCGILL UNIVERSITY; UNIVERSITY OF PENNSYLVANIA; UNIVERSITY OF PENNSYLVANIA; UNIVERSITY OF PENNSYLVANIA; PENNSYLVANIA MEDICINE; CHILDRE…	UNIV MANITOBA;UNIV MANITOBA	MARRIE RA, 2020, NEUROLOGY	MARRIE RA, 2020, NEUROLOGY
MELCHIOR M;FIGUEIREDO N;ROVERSI A;DUBANCHET A;BUI E;VADELL-MART?NEZ J;BARBUI C;PURGATO M;AYUSO-MATEOS J;MEDIAVILLA R;MCDAID D;PARK A;PETRI-ROMAO P;KALISCH R;NICAISE P;LORANT V;SIJBRANDIJ M;WITTEVEEN A;BRYANT R;FELEZ M;UNDERHILL J;POLLICE G;TORTELLI A	ACARTURK C, 2022, WORLD PSYCHIATRY, V21, P88, DOI 10.1002/WPS.20939;ANDRADE LF, 2020, PHARMACOECONOMICS, V38, P413, DOI 10.1007/S40273-019-00876-4;ANONYMOUS, 2007, PSYCHIATRY, V70, P283, DOI 10.1521/PSYC.2007.70.4.283;ASHBAUGH AR, 2016, PLOS ONE, V11, DOI 10.1371/JOURNAL.PONE.0161645;BEECHAM JK. M., 2001, MEAS MENTAL HEALTH NEEDS, V2;BOYD L, 2019, PLOS ONE, V14, DOI 10.1371/JOURNAL.PONE.0214715;B…	BACKGROUNDTHE COVID-19 PANDEMIC HAS HAD AN IMPACT ON POPULATION-WIDE MENTAL HEALTH AND WELL-BEING. ALTHOUGH PEOPLE EXPERIENCING SOCIOECONOMIC DISADVANTAGE MAY BE ESPECIALLY VULNERABLE, THEY EXPERIENCE BARRIERS IN ACCESSING MENTAL HEALTH CARE. TO OVERCOME THESE BARRIERS, THE WORLD HEALTH ORGANIZATION (WHO) DESIGNED TWO SCALABLE PSYCHOSOCIAL INTERVENTIONS, NAMELY THE WEB-BASED DOING WHAT MATTERS IN…	SORBONNE UNIV, INST PIERRE LOUIS EPIDEMIOL & SANTE PUBL, EQUIPE RECH EPIDEMIOL SOCIALE, INSERM,IPLESP, F-75012 PARIS, FRANCE.; CHU CAEN, F-14000 CAEN, FRANCE.; NORMANDIE UNIV, NEUROPRESAGE TEAM, UNICAEN, INSERM,U1237,PHIND PHYSIOPATHOL & IMAGING NEUROL D, F-14000 CAEN, FRANCE.; UNIV VERONA, WHO COLLABORATING CTR RES & TRAINING MENTAL HLTH &, DEPT NEUROSCI BIOMED & MOVEMENT SCI, VERONA, ITALY.; UN…	RANDOMIZED CONTROLLED TRIAL; PSYCHOLOGICAL DISTRESS; COVID-19; HOUSING INSTABILITY; MIGRANT; DOING WHAT MATTERS IN TIMES OF STRESS; PROBLEM MANAGEMENT PLUS; ECONOMIC EVALUATION; FRANCE	10.1186/s12889-023-17238-7	ARTICLE	PSYCHOLOGICAL DISTRESS; SELF-HELP; DEPRESSION; INTERVENTION; VALIDATION; DISORDERS; REFUGEES; ANXIETY	BMC PUBLIC HEALTH	BMC PUBLIC HEALTH	ENGLISH	BMC	2023	MELCHIOR, M (CORRESPONDING AUTHOR), SORBONNE UNIV, INST PIERRE LOUIS EPIDEMIOL & SANTE PUBL, EQUIPE RECH EPIDEMIOL SOCIALE, INSERM,IPLESP, F-75012 PARIS, FRANCE.		BMC PUBLIC HEALTH	3	ADDRESSING MENTAL HEALTH PROBLEMS AMONG PERSONS WITHOUT STABLE HOUSING IN THE CONTEXT OF THE COVID19 PANDEMIC STUDY PROTOCOL FOR A RANDOMISED TRIAL RESPOND FRANCE	23	ISI	SORBONNE UNIVERSITE; INSTITUT NATIONAL DE LA SANTE ET DE LA RECHERCHE MEDICALE (INSERM); UNIVERSITE DE CAEN NORMANDIE; CHU DE CAEN NORMANDIE; UNIVERSITE DE CAEN NORMANDIE; INSTITUT NATIONAL DE LA SANTE ET DE LA RECHERCHE MEDICALE (INSERM); UNIVERSITY OF VERONA; HOSPITAL DE LA PRINCESA; INSTITUTO DE SALUD CARLOS III; CIBER - CENTRO DE INVESTIGACION BIOMEDICA EN RED; CIBERSAM; UNIVERSITY OF LONDON;…	SORBONNE UNIV	MELCHIOR M, 2023, BMC PUBLIC HEALTH	MELCHIOR M, 2023, BMC PUBLIC HEALTH
TOULANY A;STUKEL T;KURDYAK P;FU L;GUTTMANN A	AMER ACAD PEDIAT, 2011, PEDIATRICS, V128, P182, DOI 10.1542/PEDS.2011-0969;ANNUNZIATO RA, 2007, PEDIATR TRANSPLANT, V11, P608, DOI 10.1111/J.1399-3046.2007.00689.X;BELLING R, 2014, J HEALTH SERV RES PO, V19, P169, DOI 10.1177/1355819614527439;BHAWRA J, 2016, BMJ OPEN, V6, DOI 10.1136/BMJOPEN-2016-011871;BLINDER MA, 2013, PEDIATR BLOOD CANCER, V60, P828, DOI 10.1002/PBC.24459;CLEVERLEY K, 2020, EU…	IMPORTANCE ADOLESCENTS WITH SEVERE MENTAL ILLNESS OFTEN AGE OUT OF PEDIATRIC CARE WITHOUT A CLEAR TRANSFER OF CARE TO ADULT SERVICES. THE EXTENT TO WHICH PRIMARY CARE PROVIDES STABILITY DURING THIS VULNERABLE TRANSITION PERIOD IS NOT KNOWN. OBJECTIVE TO ANALYZE THE ASSOCIATION BETWEEN PRIMARY CARE CONTINUITY DURING THE TRANSITION FROM PEDIATRIC TO ADULT CARE AND NEED FOR ACUTE MENTAL HEALTH SERVI…	HOSP SICK CHILDREN, DIV ADOLESCENT MED, 555 UNIV AVE,7440 BLACK WING, TORONTO, ON MSG 1X8, CANADA.; ICES, TORONTO, ON, CANADA.; UNIV TORONTO, DEPT PEDIAT, TORONTO, ON, CANADA.; UNIV TORONTO, INST HLTH POLICY MANAGEMENT & EVALUAT, TORONTO, ON, CANADA.; UNIV TORONTO, DEPT PSYCHIAT, FAC MED, TORONTO, ON, CANADA.; CTR ADDICT & MENTAL HLTH, INST MENTAL HLTH POLICY RES, TORONTO, ON, CANADA.; HOSP SICK …		10.1001/jamanetworkopen.2019.8415	ARTICLE	EATING-DISORDER PROGRAMS; YOUNG-PEOPLE; HEALTH-SERVICES; YOUTH; CHILD; DISEASE; INTERVIEW; PATTERNS; MODEL	JAMA NETW OPEN	JAMA NETW. OPEN	ENGLISH	AMER MEDICAL ASSOC	2019	TOULANY, A (CORRESPONDING AUTHOR), HOSP SICK CHILDREN, DIV ADOLESCENT MED, 555 UNIV AVE,7440 BLACK WING, TORONTO, ON MSG 1X8, CANADA.	2574-3805	JAMA NETWORK OPEN	39	ASSOCIATION OF PRIMARY CARE CONTINUITY WITH OUTCOMES FOLLOWING TRANSITION TO ADULT CARE FOR ADOLESCENTS WITH SEVERE MENTAL ILLNESS	2	ISI	UNIVERSITY OF TORONTO; HOSPITAL FOR SICK CHILDREN (SICKKIDS); UNIVERSITY OF TORONTO; UNIVERSITY OF TORONTO; UNIVERSITY OF TORONTO; UNIVERSITY OF TORONTO; UNIVERSITY OF TORONTO; CENTRE FOR ADDICTION AND MENTAL HEALTH -CANADA; UNIVERSITY OF TORONTO; HOSPITAL FOR SICK CHILDREN (SICKKIDS)	NOTDECLARED	TOULANY A, 2019, JAMA NETW OPEN	TOULANY A, 2019, JAMA NETW OPEN
RUDOLPH K;EATON W	ANTHONY JC, 1985, ARCH GEN PSYCHIAT, V42, P667;BADAWI MA, 1999, SOC PSYCH PSYCH EPID, V34, P91, DOI 10.1007/S001270050117;BERNDT ER, 2000, AM J PSYCHIAT, V157, P940, DOI 10.1176/APPI.AJP.157.6.940;CARTER MJ, 2014, THER RECREAT J, V48, P275;CHECKLEY W, 2010, EPIDEMIOLOGY, V21, P557, DOI 10.1097/EDE.0B013E3181E090ED;COTTER DA, 2002, RES AGING, V24, P600, DOI 10.1177/016402702237184;DOOLEY D, 1994, …	BACKGROUND INDIVIDUALS WITH A HISTORY OF MENTAL ILLNESS HAVE LOWER EARNINGS THAN INDIVIDUALS WITHOUT. A POSSIBLE REASON IS THAT THOSE WITH PRIOR ANXIETY OR DEPRESSION MAY BE MORE LIKELY TO EXIT THE LABOUR FORCE PRIOR TO RETIREMENT AGE, BUT EVIDENCE HAS BEEN MIXED AND LIMITED. OUR OBJECTIVE WAS TO COMPARE RISK OF EARLY LABOUR FORCE EXIT BETWEEN EMPLOYED ADULTS WITH A HISTORY OF DEPRESSION OR ANXIE…	UNIV CALIF BERKELEY, SCH PUBL HLTH, 590 UNIV HALL, BERKELEY, CA 94720 USA.; UNIV CALIF SAN FRANCISCO, CTR HLTH & COMMUNITY, SAN FRANCISCO, CA 94143 USA.; JOHNS HOPKINS BLOOMBERG SCH PUBL HLTH, DEPT EPIDEMIOL, BALTIMORE, MD USA.; JOHNS HOPKINS BLOOMBERG SCH PUBL HLTH, DEPT MENTAL HLTH, BALTIMORE, MD USA.;	MENTAL HEALTH; EPIDEMIOLOGY; EMPLOYMENT	10.1136/jech-2015-206202	ARTICLE	DIAGNOSTIC INTERVIEW SCHEDULE; MENTAL-DISORDERS; WORK PERFORMANCE; EMPLOYMENT; DISABILITY; IMPACT; UNEMPLOYMENT; COMORBIDITY; PREVALENCE; RETIREMENT	J EPIDEMIOL COMMUN H	J. EPIDEMIOL. COMMUNITY HEALTH	ENGLISH	BMJ PUBLISHING GROUP	2016	RUDOLPH, KE (CORRESPONDING AUTHOR), UNIV CALIF BERKELEY, SCH PUBL HLTH, 590 UNIV HALL, BERKELEY, CA 94720 USA.	0143-005X	JOURNAL OF EPIDEMIOLOGY AND COMMUNITY HEALTH	9	PREVIOUS ANXIETY AND DEPRESSION AS RISK FACTORS FOR EARLY LABOUR FORCE EXIT	70	ISI	UNIVERSITY OF CALIFORNIA SYSTEM; UNIVERSITY OF CALIFORNIA BERKELEY; UNIVERSITY OF CALIFORNIA SYSTEM; UNIVERSITY OF CALIFORNIA SAN FRANCISCO; JOHNS HOPKINS UNIVERSITY; JOHNS HOPKINS BLOOMBERG SCHOOL OF PUBLIC HEALTH; JOHNS HOPKINS UNIVERSITY; JOHNS HOPKINS BLOOMBERG SCHOOL OF PUBLIC HEALTH	UNIV CALIF BERKELEY	RUDOLPH KE, 2016, J EPIDEMIOL COMMUN H	RUDOLPH KE, 2016, J EPIDEMIOL COMMUN H
ZEBER J;COPELAND L;GRAZIER K	ANONYMOUS, 2000, COCHRANE DB SYST REV, DOI 10.1002/14651858.CD000270, DOI 10.1002/14651858.CD000270;ARMSTRONG MA, 1998, MED CARE, V36, P1599, DOI 10.1097/00005650-199811000-00009;BARTELS SJ, 1997, INT J PSYCHIAT MED, V27, P215, DOI 10.2190/VKBR-1AR6-9NBD-0N25;BAUER MS, 1997, J AFFECT DISORDERS, V44, P159, DOI 10.1016/S0165-0327(97)00046-3;BERREN MR, 1999, PSYCHIAT SERV, V50, P559, DOI 10.1176/PS.…	AS VETERANS AGE, CHRONIC PHYSICAL AND PSYCHIATRIC CONDITIONS INCREASINGLY CHALLENGE THE VETERANS HEALTH ADMINISTRATION. WE EXAMINE INFLUENCES OF AGE AND DIAGNOSIS ON HEALTH CARE UTILIZATION, WITHIN THE CONTEXT OF THE 1995 DEINSTITUTIONALIZATION POLICY OF THE VETERANS HEALTH ADMINISTRATION. VETERANS WERE HOSPITALIZED REPEATEDLY OVER 5 YEARS WITH DIAGNOSES OF SCHIZOPHRENIA, BIPOLAR DISORDER, DEPRES…	S TEXAS VET HLTH CARE SYST HSR&D, DEPT VET AFFAIRS, VET EVIDENCE BASED RES DISSEMINAT IMPLEMENTAT RES, SAN ANTONIO, TX 78229 USA.; UNIV MICHIGAN, SCH PUBL HLTH, DEPT HLTH POLICY & MANAGEMENT, ANN ARBOR, MI 48109 USA.;		10.7205/MILMED.171.7.619	ARTICLE; PROCEEDINGS PAPER	HEALTH-CARE UTILIZATION; QUALITY-OF-LIFE; OLDER-ADULTS; EMERGENCY-DEPARTMENT; MEDICAL-SERVICES; SOCIOECONOMIC-STATUS; BIPOLAR DISORDER; TREATMENT COSTS; DEPRESSION; SCHIZOPHRENIA	MIL MED	MILIT. MED.	ENGLISH	OXFORD UNIV PRESS	2006	ZEBER, JE (CORRESPONDING AUTHOR), S TEXAS VET HLTH CARE SYST HSR&D, DEPT VET AFFAIRS, VET EVIDENCE BASED RES DISSEMINAT IMPLEMENTAT RES, SAN ANTONIO, TX 78229 USA.	0026-4075	MILITARY MEDICINE	8	SERIOUS MENTAL ILLNESS AGING AND UTILIZATION PATTERNS AMONG VETERANS	171	ISI	US DEPARTMENT OF VETERANS AFFAIRS; VETERANS HEALTH ADMINISTRATION (VHA); AUDIE L. MURPHY MEMORIAL VETERANS HOSPITAL; UNIVERSITY OF MICHIGAN SYSTEM; UNIVERSITY OF MICHIGAN	JE (CORRESPONDING AUTHOR)	ZEBER JE, 2006, MIL MED	ZEBER JE, 2006, MIL MED
LIPPMAN S;LIBBY M;NAKPHONG M;ARONS A;BALANOFF M;MOCELLO A;ARNOLD E;SHADE S;QURASHI F;DOWNING A;MOORE A;DOW W;LIGHTFOOT M	ABLER L, 2017, AIDS BEHAV, V21, P2156, DOI 10.1007/S10461-016-1523-6;ADLER NE, 2010, ANN NY ACAD SCI, V1186, P5, DOI 10.1111/J.1749-6632.2009.05337.X;AKEE RKQ, 2010, AM ECON J-APPL ECON, V2, P86, DOI 10.1257/APP.2.1.86;ALEGRIA M, 2015, DISPARITIES IN CHILD AND ADOLESCENT MENTAL HEALTH AND MENTAL HEALTH SERVICES IN THE U.S;ANONYMOUS, 2018, NATIONAL SURVEY ON DRUG USE AND HEALTH (NSDUH): HISPANICS,…	BACKGROUND: ECONOMIC INEQUITY SYSTEMATICALLY AFFECTS BLACK EMERGING ADULTS (BEA), AGED 18-24, AND THEIR HEALTHY TRAJECTORY INTO ADULTHOOD. GUARANTEED INCOME (GI)-TEMPORARY, UNCONDITIONAL CASH PAYMENTS-IS GAINING TRACTION AS A POLICY SOLUTION TO ADDRESS THE INEQUITABLE DISTRIBUTION OF RESOURCES SEWN BY DECADES OF STRUCTURAL RACISM AND DISINVESTMENT. GI PROVIDES RECIPIENTS WITH SECURITY, TIME, AND …	UNIV CALIF SAN FRANCISCO, DEPT MED, DIV PREVENT SCI, SAN FRANCISCO, CA 94132 USA.; MYPATH, SAN FRANCISCO, CA USA.; UNIV CALIF SAN FRANCISCO, INST GLOBAL HLTH SCI, DEPT EPIDEMIOL & BIOSTAT, SAN FRANCISCO, CA USA.; UNIV CALIF BERKELEY, DEPT HLTH POLICY & MANAGEMENT, BERKELEY, CA USA.; PORTLAND STATE UNIV, OREGON HLTH & SCI UNIV, SCH PUBL HLTH, PORTLAND, OR USA.;	GUARANTEED INCOME; BLACK YOUNG ADULT; ECONOMIC EMPOWERMENT; CROSS-OVER TRIAL; CASH TRANSFER; SOCIOECONOMIC DISPARITIES IN HEALTH; SYSTEMIC RACISM	10.3389/fpubh.2023.1271194	ARTICLE	GENERALIZED ANXIETY DISORDER; MODELING PROPENSITY SCORES; CONDITIONAL CASH TRANSFER; MENTAL-HEALTH; RACIAL/ETHNIC DISPARITIES; CARE UTILIZATION; SOCIAL SUPPORT; PUBLIC-HEALTH; YOUNG-WOMEN; ADOLESCENTS	FRONT PUBLIC HEALTH	FRONT. PUBLIC HEALTH	ENGLISH	FRONTIERS MEDIA SA	2023	NAKPHONG, MK (CORRESPONDING AUTHOR), UNIV CALIF SAN FRANCISCO, DEPT MED, DIV PREVENT SCI, SAN FRANCISCO, CA 94132 USA.		FRONTIERS IN PUBLIC HEALTH	1	A GUARANTEED INCOME INTERVENTION TO IMPROVE THE HEALTH AND FINANCIAL WELLBEING OF LOWINCOME BLACK EMERGING ADULTS STUDY PROTOCOL FOR THE BLACK ECONOMIC EQUITY MOVEMENT RANDOMIZED CONTROLLED CROSSOVER TRIAL	11	ISI	UNIVERSITY OF CALIFORNIA SYSTEM; UNIVERSITY OF CALIFORNIA SAN FRANCISCO; UNIVERSITY OF CALIFORNIA SYSTEM; UNIVERSITY OF CALIFORNIA SAN FRANCISCO; UNIVERSITY OF CALIFORNIA SYSTEM; UNIVERSITY OF CALIFORNIA BERKELEY; PORTLAND STATE UNIVERSITY; OREGON HEALTH AND SCIENCE UNIVERSITY	UNIV CALIF SAN FRANCISCO	LIPPMAN SA, 2023, FRONT PUBLIC HEALTH	LIPPMAN SA, 2023, FRONT PUBLIC HEALTH
SUH H;KO Y;MOON S;KIM J;CHUNG S;HONG S;LEE H;HUANG C;JANG B	AMERICAN PSYCHIATRIC ASSOCIATION, 2000, DIAGNOSTIC STAT MANU, P900;AMERICAN PSYCHIATRIC ASSOCIATION (APA), 1980, DIAGNOSTIC AND STATISTICAL MANUAL OF MENTAL DISORDERS: DSM-5, V3TH, DOI 10.1176/APPI.BOOKS.9780890425596;ANONYMOUS, 2007, WHO INT STAND TERM T;ARMOUR M, 2019, J CLIN MED, V8, DOI 10.3390/JCM8081140;???, 2005, THE JOURNAL OF KOREAN ORIENTAL INTERNAL MEDICINE, ?????????, V26, P844;BASTIE…	INTRODUCTION:MENTAL HEALTH IS AN IMPORTANT GLOBAL HEALTH CONCERN. IN KOREA, MANY PEOPLE VISIT KOREAN MEDICINE CLINICS DUE TO STAGNATION SYNDROME AND HWABYUNG (CULTURAL IDIOMS OF DISTRESS). METHODS AND ANALYSIS:WE ESTABLISHED A RESEARCH COLLABORATION COMPRISING OF PROFESSIONALS FROM 8 KOREAN MEDICINE HOSPITALS AND PLANNED A PROSPECTIVE, MULTICENTER REGISTRY STUDY. DEMOGRAPHIC, SOCIOECONOMIC, AND C…	DIV HEALTHCARE RES, HLTH POLICY RES TEAM, NATL EVIDENCE BASED HEALTHCARE COLLABORATING AGCY, SEOUL, SOUTH KOREA.; KYUNG HEE UNIV, COLL KOREAN MED, DEPT PREVENT MED, SEOUL, SOUTH KOREA.; INST SAFETY & EFFICACY, EFFECTIVENESS EVALUAT KOREAN MED, SEOUL, SOUTH KOREA.; KYUNG HEE UNIV, GRAD SCH, DEPT GLOBAL PUBL HLTH & KOREAN MED MANAGEMENT, SEOUL, SOUTH KOREA.; KYUNG HEE UNIV, GRAD SCH, DEPT CLIN KORE…	COMPLEMENTARY THERAPIES; COST OF ILLNESS; KOREAN TRADITIONAL MEDICINE; MENTAL HEALTH; REGISTRIES	10.1097/MD.0000000000032151	ARTICLE	ALTERNATIVE MEDICINE; MENTAL-DISORDERS; CHINESE MEDICINE; COMPLEMENTARY; DEPRESSION; VALIDATION; STAGNATION; CULTURE; VERSION; STIGMA	MEDICINE	MEDICINE (BALTIMORE)	ENGLISH	LIPPINCOTT WILLIAMS & WILKINS	2022	JANG, BH (CORRESPONDING AUTHOR), KYUNG HEE UNIV, COLL KOREAN MED, DEPT PREVENT MED, SEOUL, SOUTH KOREA.; JANG, BH (CORRESPONDING AUTHOR), INST SAFETY & EFFICACY, EFFECTIVENESS EVALUAT KOREAN MED, SEOUL, SOUTH KOREA.; JANG, BH (CORRESPONDING AUTHOR), KYUNG HEE UNIV, GRAD SCH, DEPT GLOBAL PUBL HLTH & KOREAN MED MANAGEMENT, SEOUL, SOUTH KOREA.	0025-7974	MEDICINE	1	A MULTICENTER REGISTRY OF NEUROPSYCHIATRIC OUTPATIENTS IN KOREAN MEDICINE HOSPITALS KMENTAL PROTOCOL OF A PROSPECTIVE MULTICENTER REGISTRY STUDY	101	ISI	NATIONAL EVIDENCE-BASED HEALTHCARE COLLABORATING AGENCY (NECA); KYUNG HEE UNIVERSITY; KYUNG HEE UNIVERSITY; KYUNG HEE UNIVERSITY; KYUNG HEE UNIVERSITY	KYUNG HEE UNIV;INST SAFETY AND EFFICACY;KYUNG HEE UNIV	SUH HW, 2022, MEDICINE	SUH HW, 2022, MEDICINE
CARLISLE C;MAMDANI M;SCHACHAR R;TO T	ADAIR CE, 2007, PSYCHIAT SERV, V58, P1521, DOI 10.1176/APPI.PS.58.12.1521;ANGOLD A, 1998, AM J PUBLIC HEALTH, V88, P75, DOI 10.2105/AJPH.88.1.75;ANONYMOUS, REG NURS CAN TRENDS;ANONYMOUS, SUIC SUIC RAT SEX AG;ANONYMOUS, 2021, 1 NAT IN MET PUBL DI;ANONYMOUS, 2009, HEALTH INEQUALITIES AND SOCIAL DETERMINANTS OF ABORIGINAL PEOPLES' HEALTH;APA A.P. A., 2000, DIAGNOSTIC AND STATISTICAL MANUAL OF MENTAL…	OBJECTIVE: TIMELY AFTERCARE CAN BE VIEWED AS A PATIENT SAFETY IMPERATIVE. IN THE CONTEXT OF DECREASING INPATIENT LENGTH OF STAY (LOS) AND KNOWN CHILD PSYCHIATRY HUMAN RESOURCE CHALLENGES, WE INVESTIGATED TIME TO AFTERCARE FOR ADOLESCENTS FOLLOWING PSYCHIATRIC HOSPITALIZATION. METHOD: WE CONDUCTED A POPULATION-BASED COHORT STUDY OF ADOLESCENTS AGED 15 TO 19 YEARS WITH PSYCHIATRIC DISCHARGE BETWEEN…	CAMH, YOUTH ADDICT & CONCURRENT DISORDERS SERV, TORONTO, ON M6J 1H4, CANADA.; UNIV TORONTO, DEPT PSYCHIAT, TORONTO, ON, CANADA.; ST MICHAELS HOSP, LI KA SHING KNOWLEDGE INST, KEENAN RES CTR, TORONTO, ON M5B 1W8, CANADA.; APPL HLTH RES CTR, TORONTO, ON, CANADA.; UNIV TORONTO, INST HLTH POLICY MANAGEMENT & EVALUAT, LESLIE DAN FAC PHARM, TORONTO, ON, CANADA.; INST CLIN EVALUAT SCI, TORONTO, ON, CANA…	RURAL; URBAN; MENTAL HEALTH SERVICES; AFTERCARE; CONTINUITY OF CARE; HEALTH CARE DISPARITY; HEALTH POLICY; HEALTH CARE REFORM	10.1177/070674371205701104	ARTICLE	CHILDRENS MENTAL-HEALTH; ALCOHOL-USE DISORDERS; FOLLOW-UP; PRIMARY-CARE; SOCIOECONOMIC-STATUS; LONGITUDINAL COHORT; SERVICE USE; INPATIENT; OUTPATIENT; COMMUNITY	CAN J PSYCHIAT	CAN. J. PSYCHIAT.-REV. CAN. PSYCHIAT.	ENGLISH	CANADIAN PSYCHIATRIC ASSOC	2012	CARLISLE, CE (CORRESPONDING AUTHOR), CAMH, YOUTH ADDICT & CONCURRENT DISORDERS SERV, 80 WORKMAN WAY,ROOM 5332, TORONTO, ON M6J 1H4, CANADA.	0706-7437	CANADIAN JOURNAL OF PSYCHIATRY-REVUE CANADIENNE DE PSYCHIATRIE	15	PREDICTORS OF PSYCHIATRIC AFTERCARE AMONG FORMERLY HOSPITALIZED ADOLESCENTS	57	ISI	UNIVERSITY OF TORONTO; CENTRE FOR ADDICTION AND MENTAL HEALTH - CANADA; UNIVERSITY OF TORONTO; UNIVERSITY OF TORONTO; SAINT MICHAELS HOSPITAL TORONTO; LI KA SHING KNOWLEDGE INSTITUTE; UNIVERSITY OF TORONTO; UNIVERSITY OF TORONTO; UNIVERSITY OF TORONTO; HOSPITAL FOR SICK CHILDREN (SICKKIDS); UNIVERSITY OF TORONTO	CE (CORRESPONDING AUTHOR)	CARLISLE CE, 2012, CAN J PSYCHIAT	CARLISLE CE, 2012, CAN J PSYCHIAT
AKHTER S;MAHMOOD N;RUTHERFORD S	ADGER WN, 2021, J PEACE RES, V58, P50, DOI 10.1177/0022343320973717;AFSAR RITA., 2003, REGIONAL C MIGRATION, P22, DOI 10.1057/DEV.2009.89, DOI 10.1057/DEV.2009.89;AHSAN R M, 1997, INT J POPUL GEOGR, V3, P49, DOI 10.1002/(SICI)1099-1220(199703)3:1<49::AID-IJPG57>3.0.CO;2-J;AKHTER S, 2017, INT J WOMENS HEALTH, V9, P571, DOI 10.2147/IJWH.S137250;AMIN S, 1998, STUD FAMILY PLANN, V29, P185, DOI 10.230…	INTERNAL MIGRANTS ARE MORE DISADVANTAGED THAN NON-MIGRANTS IN TERMS OF THEIR HEALTH. HOWEVER, THE EXTENT OF THIS DIFFERENCE IS UNCLEAR. FOLLOWING THE PRISMA GUIDELINE, WE CONDUCTED A SYSTEMATIC REVIEW TO EXPLORE THE EXISTING EVIDENCE ON THE HEALTH OF INTERNAL MIGRANTS OF BANGLADESH. WE SEARCHED PUBMED, WEB OF SCIENCE AND GOOGLE SCHOLAR TO IDENTIFY PEER-REVIEWED LITERATURE ON HEALTH RELATED ISSUES…	BANGLADESH ICDDR B, INT CTR DIARRHOEAL DIS RES, HLTH SYST & POPULAT STUDIES DIV, DHAKA, BANGLADESH.; GRIFFITH UNIV, SCH MED & DENT, GOLD COAST, QLD, AUSTRALIA.;	BANGLADESH; HEALTH; INTERNAL MIGRANTS; SYSTEMATIC REVIEW	10.1002/hpm.3380	REVIEW	METHODOLOGICAL GUIDANCE; SEXUAL RISK; CLIMATE; MIGRATION; DHAKA; WOMEN; DISPLACEMENT; CHILDREN; WORKERS; CITY	INT J HEALTH PLAN M	INT. J. HEALTH PLAN. MANAG.	ENGLISH	WILEY	2022	MAHMOOD, N (CORRESPONDING AUTHOR), BANGLADESH ICDDR B, INT CTR DIARRHOEAL DIS RES, HLTH SYST & POPULAT STUDIES DIV, DHAKA, BANGLADESH.	0749-6753	INTERNATIONAL JOURNAL OF HEALTH PLANNING AND MANAGEMENT	3	A SYSTEMATIC REVIEW OF THE HEALTH OF INTERNAL MIGRANTS IN BANGLADESH	37	ISI	INTERNATIONAL CENTRE FOR DIARRHOEAL DISEASE RESEARCH (ICDDR); GRIFFITH UNIVERSITY; GRIFFITH UNIVERSITY - GOLD COAST CAMPUS	INT CTR DIARRHOEAL DIS RES	AKHTER S, 2022, INT J HEALTH PLAN M	AKHTER S, 2022, INT J HEALTH PLAN M
RESTAR A;GARRISON-DESANY H;BAKER K;ADAMSON T;HOWELL S;BARAL S;OPERARIO D;BECKHAM S	BARAL S., 2021, COMPETING HLTH RISKS, DOI 10.1101/2021. 01.07.21249419, DOI 10.1101/2021.01.07.21249419, 10.1101/2021.01.07.21249419;BEHZADIFAR M, 2020, INT J EQUITY HEALTH, V19, DOI 10.1186/S12939-020-01181-9;BROWN CS., 2020, INEQUALITY CORONAVIR;BUSH K, 1998, ARCH INTERN MED, V158, P1789, DOI 10.1001/ARCHINTE.158.16.1789;CAHILL S, 2020, AM J PUBLIC HEALTH, V110, P1360, DOI 10.2105/AJPH.2020.305…	BACKGROUND TESTING FOR COVID-19 AND LINKAGE TO SERVICES IS FUNDAMENTAL TO SUCCESSFUL CONTAINMENT AND CONTROL OF TRANSMISSION. YET, KNOWLEDGE ON COVID-19 TESTING AMONG TRANSGENDER AND NON-BINARY COMMUNITIES REMAINS LIMITED. METHODS BETWEEN OCTOBER 2020 AND NOVEMBER 2020, WE EXAMINED THE PREVALENCE AND ASSOCIATIONS OF COVID-19 TESTING IN AN ONLINE SAMPLE OF TRANSGENDER AND NON-BINARY PEOPLE (N=536)…	JOHNS HOPKINS UNIV, BLOOMBERG SCH PUBL HLTH, DEPT EPIDEMIOL, BALTIMORE, MD USA.; BROWN UNIV, SCH PUBL HLTH, DEPT BEHAV & SOCIAL SCI, PROVIDENCE, RI 02912 USA.; JOHNS HOPKINS UNIV, BLOOMBERG SCH PUBL HLTH, DEPT HLTH POLICY & MANAGEMENT, BALTIMORE, MD USA.; HORNET, SAN FRANCISCO, CA USA.; JOHNS HOPKINS UNIV, BLOOMBERG SCH PUBL HLTH, DEPT HLTH BEHAV & SOC, BALTIMORE, MD USA.;	COVID-19; CROSS-SECTIONAL SURVEY; PUBLIC HEALTH	10.1136/bmjgh-2021-006808	ARTICLE	HEALTH; CARE; ADULTS	BMJ GLOB HEALTH	BMJ GLOB. HEALTH	ENGLISH	BMJ PUBLISHING GROUP	2021	RESTAR, A (CORRESPONDING AUTHOR), JOHNS HOPKINS UNIV, BLOOMBERG SCH PUBL HLTH, DEPT EPIDEMIOL, BALTIMORE, MD USA.; RESTAR, A (CORRESPONDING AUTHOR), BROWN UNIV, SCH PUBL HLTH, DEPT BEHAV & SOCIAL SCI, PROVIDENCE, RI 02912 USA.	2059-7908	BMJ GLOBAL HEALTH	2	PREVALENCE AND ASSOCIATIONS OF COVID19 TESTING IN AN ONLINE SAMPLE OF TRANSGENDER AND NONBINARY INDIVIDUALS	6	ISI	JOHNS HOPKINS UNIVERSITY; JOHNS HOPKINS BLOOMBERG SCHOOL OF PUBLIC HEALTH; BROWN UNIVERSITY; JOHNS HOPKINS UNIVERSITY; JOHNS HOPKINS BLOOMBERG SCHOOL OF PUBLIC HEALTH; JOHNS HOPKINS UNIVERSITY; JOHNS HOPKINS BLOOMBERG SCHOOL OF PUBLIC HEALTH	JOHNS HOPKINS UNIV;BROWN UNIV	RESTAR A, 2021, BMJ GLOB HEALTH	RESTAR A, 2021, BMJ GLOB HEALTH
ROTBERG B;HORV?TH-PUH? E;VIGOD S;RAY J;SORENSEN H;COHEN E	ABOUK R, 2017, JAMA-J AM MED ASSOC, V318, P2111, DOI 10.1001/JAMA.2017.17627;BAADSGAARD M, 2011, SCAND J PUBLIC HEALT, V39, P103, DOI 10.1177/1403494811405098;BLIDDAL M, 2018, EUR J EPIDEMIOL, V33, P27, DOI 10.1007/S10654-018-0356-1;COHEN E, 2016, JAMA-J AM MED ASSOC, V316, P2515, DOI 10.1001/JAMA.2016.18425;COHEN S, 2007, JAMA-J AM MED ASSOC, V298, P1685, DOI 10.1001/JAMA.298.14.1685;COHN LN, 20…	BACKGROUND THE BIRTH OF A CHILD WITH A MAJOR CONGENITAL ANOMALY MAY CREATE CHRONIC CAREGIVING STRESS FOR MOTHERS, YET LITTLE IS KNOWN ABOUT THEIR PSYCHIATRIC OUTCOMES. AIMS TO EVALUATE THE ASSOCIATION OF THE BIRTH OF A CHILD WITH A MAJOR CONGENITAL ANOMALY WITH SUBSEQUENT MATERNAL PSYCHIATRIC RISK. METHODS THIS DANISH NATIONWIDE COHORT STUDY INCLUDED MOTHERS WHO GAVE BIRTH TO AN INFANT WITH A MAJ…	UNIV TORONTO, HOSP SICK CHILDREN, DEPT PSYCHIAT, TORONTO, ON, CANADA.; AARHUS UNIV HOSP, DEPT CLIN EPIDEMIOL, AARHUS, DENMARK.; UNIV TORONTO, INST HLTH POLICY MANAGEMENT & EVALUAT, TORONTO, ON, CANADA.; UNIV TORONTO, WOMENS COLL HOSP, DEPT PSYCHIAT, TORONTO, ON, CANADA.; UNIV TORONTO, ST MICHAELS HOSP, DEPT MED, TORONTO, ON, CANADA.; STANFORD UNIV, DEPT HLTH RES & POLICY, DIV EPIDEMIOL, STANFORD,…	MAJOR CONGENITAL ANOMALIES; MATERNAL HEALTH; PSYCHIATRIC DISORDERS	10.1111/acps.13181	ARTICLE	CONGENITAL HEART-DISEASE; MENTAL-HEALTH; PARENTS; MOTHERS; BIRTH; ASSOCIATION; MORTALITY; FAMILIES; STRESS; INFANT	ACTA PSYCHIAT SCAND	ACTA PSYCHIATR. SCAND.	ENGLISH	WILEY	2020	COHEN, E (CORRESPONDING AUTHOR), HOSP SICK CHILDREN, 555 UNIV AVE, TORONTO, ON M5G 1X8, CANADA.	0001-690X	ACTA PSYCHIATRICA SCANDINAVICA	7	INCREASED MATERNAL NEWONSET PSYCHIATRIC DISORDERS AFTER DELIVERING A CHILD WITH A MAJOR ANOMALY A COHORT STUDY	142	ISI	UNIVERSITY OF TORONTO; HOSPITAL FOR SICK CHILDREN (SICKKIDS); AARHUS UNIVERSITY; UNIVERSITY OF TORONTO; UNIVERSITY OF TORONTO; WOMENS COLLEGE HOSPITAL; UNIVERSITY OF TORONTO; SAINT MICHAELS HOSPITAL TORONTO; STANFORD UNIVERSITY; UNIVERSITY OF TORONTO; HOSPITAL FOR SICK CHILDREN (SICKKIDS)	NOTDECLARED	ROTBERG B, 2020, ACTA PSYCHIAT SCAND	ROTBERG B, 2020, ACTA PSYCHIAT SCAND
WOODALL A;ABUZOUR A;WILSON S;MAIR F;BUCHAN I;SHEARD S;ATKINSON P;JOYCE D;SYMON P;WALKER L	ALEXANDER RT, 2017, BRIT J GEN PRACT, V67, P372, DOI 10.3399/BJGP17X692081;ANONYMOUS, 2023, CONSULTANT CONNECT INTERNET;ARCHER J, 2012, COCHRANE DB SYST REV, DOI 10.1002/14651858.CD006525.PUB2;BRAUN V, 2021, QUAL RES PSYCHOL, V18, P328, DOI 10.1080/14780887.2020.1769238;COMER JS, 2011, AM J PSYCHIAT, V168, P1057, DOI 10.1176/APPI.AJP.2011.11010087;COON JT, 2014, J AM MED DIR ASSOC, V15, P706, DOI…	INTRODUCTION ANTIPSYCHOTIC MEDICATION IS INCREASINGLY PRESCRIBED TO PATIENTS WITH SERIOUS MENTAL ILLNESS. PATIENTS WITH SERIOUS MENTAL ILLNESS OFTEN HAVE CARDIOVASCULAR AND METABOLIC COMORBIDITIES, AND ANTIPSYCHOTICS INDEPENDENTLY INCREASE THE RISK OF CARDIOMETABOLIC DISEASE. DESPITE THIS, MANY PATIENTS PRESCRIBED ANTIPSYCHOTICS ARE DISCHARGED TO PRIMARY CARE WITHOUT PLANNED PSYCHIATRIC REVIEW. W…	UNIV LIVERPOOL, INST POPULAT HLTH, DEPT PRIMARY CARE & MENTAL HLTH, LIVERPOOL, ENGLAND.; BRONLLYS HOSP, POWYS TEACHING HLTH BOARD, BRONLLYS, POWYS, WALES.; UNIV LEEDS, SCH MED, UNIT AGEING & STROKE RES, LEEDS, WEST YORKSHIRE, ENGLAND.; UNIV LIVERPOOL, INST POPULAT HLTH, DEPT PUBL HLTH POLICY & SYST, LIVERPOOL, ENGLAND.; UNIV GLASGOW, SCH HLTH & WELLBEING, GEN PRACTICE & PRIMARY CARE, GLASGOW CITY…		10.1371/journal.pone.0294974	ARTICLE	ATYPICAL ANTIPSYCHOTICS; MENTAL-ILLNESS; PEOPLE; MORTALITY; DISORDER; SCHIZOPHRENIA; FACILITATORS; SATURATION; INTERVIEWS; GUIDELINES	PLOS ONE	PLOS ONE	ENGLISH	PUBLIC LIBRARY SCIENCE	2024	WALKER, LE (CORRESPONDING AUTHOR), UNIV LIVERPOOL, INST SYST MOL & INTEGRAT BIOL, DEPT PHARMACOL & THERAPEUT, LIVERPOOL, ENGLAND.	1932-6203	PLOS ONE	3	MANAGEMENT OF ANTIPSYCHOTICS IN PRIMARY CARE INSIGHTS FROM HEALTHCARE PROFESSIONALS AND POLICY MAKERS IN THE UNITED KINGDOM	19	ISI	UNIVERSITY OF LIVERPOOL; UNIVERSITY OF LEEDS; UNIVERSITY OF LIVERPOOL; UNIVERSITY OF GLASGOW; UNIVERSITY OF LIVERPOOL; UNIVERSITY OF LIVERPOOL	UNIV LIVERPOOL	WOODALL AA, 2024, PLOS ONE	WOODALL AA, 2024, PLOS ONE
LASSERRE A;IMTIAZ S;ROERECKE M;HEILIG M;PROBST C;REHM J	ABRAHAM HD, 1999, COMPR PSYCHIAT, V40, P44, DOI 10.1016/S0010-440X(99)90076-7;AMERICAN PSYCHIATRIC ASSOCIATION (APA), 1980, DIAGNOSTIC AND STATISTICAL MANUAL OF MENTAL DISORDERS: DSM-5, V3TH, DOI 10.1176/APPI.BOOKS.9780890425596;ANONYMOUS, 2021, STATA STATISTICAL SOFTWARE: RELEASE 17;ASSANANGKORNCHAI S, 2020, BMC PSYCHIATRY, V20, DOI 10.1186/S12888-020-02958-6;BELLIS MA, 2016, BMC PUBLIC HEALTH, …	BACKGROUND: DEPRESSIVE DISORDERS (DD) AND ALCOHOL USE DISORDERS (AUD) FREQUENTLY CO-OCCUR. THEY ARE KEY TO UNDERSTANDING THE CURRENT INCREASES IN "DEATHS OF DESPAIR" AMONG INDIVIDUALS WITH LOWER SOCIOECONOMIC STATUS (SES). THE AIM OF THIS STUDY WAS TO ASSESS THE PROSPECTIVE BIDIRECTIONAL ASSOCIATIONS BETWEEN AUD AND DD, AS WELL AS THE EFFECT OF SES ON THESE TWO CONDITIONS. METHODS: THE NATIONAL E…	CTR ADDICT & MENTAL HLTH CAMH, INST MENTAL HLTH POLICY RES, 33 URSULA FRANKLIN ST, TORONTO, ON M5S 2S1, CANADA.; LAUSANNE UNIV HOSP, DEPT PSYCHIAT, ADDICT MED, RUE BUGNON 23, CH-1011 LAUSANNE, SWITZERLAND.; UNIV TORONTO, DALLA LANA SCH PUBL HLTH, 155 COLL ST, TORONTO, ON M5T 1P8, CANADA.; CAMH, CAMPBELL FAMILY MENTAL HLTH RES INST, 33 URSULA FRANKLIN ST, TORONTO, ON M5S 2S1, CANADA.; LINKOPING UN…	EDUCATIONAL ATTAINMENT; ALCOHOL CONSUMPTION; DEPRESSIVE DISORDERS; SEVERITY OF MENTAL DISORDERS; INTERACTION; COHORT; GENERAL POPULATION	10.1016/j.jad.2021.12.132	ARTICLE	NATIONAL EPIDEMIOLOGIC SURVEY; SUBSTANCE USE DISORDERS; EDUCATIONAL-ATTAINMENT; SOCIAL-INEQUALITY; RISK-FACTORS; MORTALITY; ASSOCIATION; CONSUMPTION; DRINKING; ADULTS	J AFFECT DISORDERS	J. AFFECT. DISORD.	ENGLISH	ELSEVIER	2022	LASSERRE, AM (CORRESPONDING AUTHOR), LAUSANNE UNIV HOSP, DEPT PSYCHIAT, ADDICT MED, RUE BUGNON 23, CH-1011 LAUSANNE, SWITZERLAND.	0165-0327	JOURNAL OF AFFECTIVE DISORDERS	24	SOCIOECONOMIC STATUS ALCOHOL USE DISORDERS AND DEPRESSION A POPULATIONBASED STUDY	301	ISI	UNIVERSITY OF TORONTO; CENTRE FOR ADDICTION AND MENTAL HEALTH - CANADA; UNIVERSITY OF LAUSANNE; CENTRE HOSPITALIER UNIVERSITAIRE VAUDOIS (CHUV); UNIVERSITY OF TORONTO; UNIVERSITY OF TORONTO; CENTRE FOR ADDICTION AND MENTAL HEALTH - CANADA; LINKOPING UNIVERSITY; RUPRECHT KARLS UNIVERSITY HEIDELBERG; UNIVERSITY OF TORONTO; TECHNISCHE UNIVERSITAT DRESDEN; TECHNISCHE UNIVERSITAT DRESDEN; SECHENOV FIR…	LAUSANNE UNIV HOSP	LASSERRE AM, 2022, J AFFECT DISORDERS	LASSERRE AM, 2022, J AFFECT DISORDERS
VU H;LIN V;PHAM T;PHAM T;NGUYEN A;NGUYEN H;NGUYEN T;NGUYEN T;NGUYEN H;NGUYEN T;NGUYEN L;NGUYEN Q;NGUYEN H;TRAN T;TRAN B;LATKIN C;HO C;HO R	ALONSO J, 2004, ACTA PSYCHIAT SCAND, V109, P21;ANONYMOUS, 2001, COCHRANE DATABASE SYST REV;TRAN BX, 2012, HEALTH QUAL LIFE OUT, V10, DOI 10.1186/1477-7525-10-132;BANG KS, 2017, BIOMED RES INT, V2017, DOI 10.1155/2017/4830968;CHENG ST, 2010, AM J GERIAT PSYCHIAT, V18, P256, DOI 10.1097/JGP.0B013E3181BF9EDD;DAO-TRAN T.H., 2018, BMC RES NOTES, V11, P174, DOI 10.1186/S13104-018-3282-0, DOI 10.1186/S1…	(1) BACKGROUND: MAJOR CAUSES OF THE BURDEN OF DISEASE IN OLDER PERSONS INCLUDE MENTAL DISORDERS AND NEUROLOGICAL DISEASES, SUCH AS DEPRESSION. THIS STUDY AIMS TO EXPLORE THE PREVALENCE OF OLDER PEOPLE AT RISK FOR DEPRESSION AND IDENTIFY THE FACTORS ASSOCIATED WITH THIS RISK IN RURAL VIETNAM. (2) METHODS: A CROSS-SECTIONAL STUDY WAS CONDUCTED IN SOC SON, HANOI WITH 523 COMMUNITY DWELLING ELDERS AG…	HANOI MED UNIV, DEPT GERONTOL & GERIATR, HANOI 100000, VIETNAM.; NATL GERIATR HOSP, SCI RES DEPT, HANOI 100000, VIETNAM.; UNIV MINNESOTA, SCH PUBL HLTH, DEPT HLTH POLICY & MANAGEMENT, MINNEAPOLIS, MN 55455 USA.; HANOI MED UNIV, DEPT FAMILY MED, HANOI 100000, VIETNAM.; HANOI MED UNIV, DEPT NEUROL, HANOI 100000, VIETNAM.; DINH TIEN HOANG INST MED, HANOI 100000, VIETNAM.; NGUYEN TAT THANH UNIV, CTR …	RISK FOR DEPRESSION; OLDER ADULTS; RURAL; VIETNAM; MENTAL HEALTH SERVICES	10.3390/ijerph16152654	ARTICLE	QUALITY-OF-LIFE; HEALTH; PREVALENCE; SYMPTOMS; WOMEN; METAANALYSIS; HYPERTENSION; COUNTRIES; VIOLENCE; ADULTS	INT J ENV RES PUB HE	INT. J. ENVIRON. RES. PUBLIC HEALTH	ENGLISH	MDPI	2019	VU, HTT (CORRESPONDING AUTHOR), HANOI MED UNIV, DEPT GERONTOL & GERIATR, HANOI 100000, VIETNAM.; VU, HTT (CORRESPONDING AUTHOR), NATL GERIATR HOSP, SCI RES DEPT, HANOI 100000, VIETNAM.		INTERNATIONAL JOURNAL OF ENVIRONMENTAL RESEARCH AND PUBLIC HEALTH	16	DETERMINING RISK FOR DEPRESSION AMONG OLDER PEOPLE RESIDING IN VIETNAMESE RURAL SETTINGS	16	ISI	HANOI MEDICAL UNIVERSITY; UNIVERSITY OF MINNESOTA SYSTEM; UNIVERSITY OF MINNESOTA TWIN CITIES; HANOI MEDICAL UNIVERSITY; HANOI MEDICAL UNIVERSITY; NGUYEN TAT THANH UNIVERSITY (NTTU); UNIVERSITE CLAUDE BERNARD LYON 1; NGUYEN TAT THANH UNIVERSITY (NTTU); DUY TAN UNIVERSITY; HANOI MEDICAL UNIVERSITY; JOHNS HOPKINS UNIVERSITY; JOHNS HOPKINS BLOOMBERG SCHOOL OF PUBLIC HEALTH; NATIONAL UNIVERSITY OF SI…	HANOI MED UNIV;SCI RES DEPT	VU HTT, 2019, INT J ENV RES PUB HE	VU HTT, 2019, INT J ENV RES PUB HE
NICKLETT E;BURGARD S	ABE-KIM J, 2007, AM J PUBLIC HEALTH, V97, P91, DOI 10.2105/AJPH.2006.098541;ADLER NE, 2000, HEALTH PSYCHOL, V19, P586, DOI 10.1037/0278-6133.19.6.586;AKRESH IR, 2006, INT MIGR REV, V40, P854, DOI 10.1111/J.1747-7379.2006.00046.X;ALEGRIA M, 2004, INT J METH PSYCH RES, V13, P270, DOI 10.1002/MPR.181;ALEGRIA M, 2007, AM J PUBLIC HEALTH, V97, P68, DOI 10.2105/AJPH.2006.087205;ALVIDREZ J, 1999, COMMUN…	THE AUTHORS ANALYZED THE ASSOCIATION BETWEEN DOWNWARD SOCIAL MOBILITY IN SUBJECTIVE SOCIAL STATUS AMONG 3,056 IMMIGRANTS TO THE UNITED STATES AND THE ODDS OF A MAJOR DEPRESSIVE EPISODE. USING DATA FROM THE NATIONAL LATINO AND ASIAN AMERICAN STUDY (2002-2003), THE AUTHORS EXAMINED DOWNWARD MOBILITY BY COMPARING IMMIGRANTS' SUBJECTIVE SOCIAL STATUS IN THEIR COUNTRY OF ORIGIN WITH THEIR SUBJECTIVE S…	UNIV MICHIGAN, SCH PUBL HLTH, DEPT HLTH POLICY & MANAGEMENT, ANN ARBOR, MI 48109 USA.; UNIV MICHIGAN, COLL LITERATURE SCI & ARTS, DEPT SOCIOL, ANN ARBOR, MI 48109 USA.;	ASIAN AMERICANS; DEPRESSION; EMIGRATION AND IMMIGRATION; HISPANIC AMERICANS; MENTAL DISORDERS; MENTAL HEALTH; SOCIAL CLASS; SOCIAL MOBILITY	10.1093/aje/kwp192	ARTICLE; PROCEEDINGS PAPER	STRESSFUL LIFE EVENTS; MENTAL-HEALTH STATUS; SOCIOECONOMIC-STATUS; MEXICAN-AMERICANS; PSYCHIATRIC EPIDEMIOLOGY; CARIBBEAN IMMIGRANTS; ACCULTURATION; DISCRIMINATION; PREVALENCE; DISORDERS	AM J EPIDEMIOL	AM. J. EPIDEMIOL.	ENGLISH	OXFORD UNIV PRESS INC	2009	NICKLETT, EJ (CORRESPONDING AUTHOR), UNIV MICHIGAN, SCH PUBL HLTH, DEPT HLTH POLICY & MANAGEMENT, 109 S OBSERV ST, ANN ARBOR, MI 48109 USA.	0002-9262	AMERICAN JOURNAL OF EPIDEMIOLOGY	95	DOWNWARD SOCIAL MOBILITY AND MAJOR DEPRESSIVE EPISODES AMONG LATINO AND ASIANAMERICAN IMMIGRANTS TO THE UNITED STATES	170	ISI	UNIVERSITY OF MICHIGAN SYSTEM; UNIVERSITY OF MICHIGAN; UNIVERSITY OF MICHIGAN SYSTEM; UNIVERSITY OF MICHIGAN	UNIV MICHIGAN	NICKLETT EJ, 2009, AM J EPIDEMIOL	NICKLETT EJ, 2009, AM J EPIDEMIOL
BOSCARINO J;ADAMS R;FIGLEY C;GALEA S;FOA E	ACIERNO R, 2000, J TRAUMA STRESS, V13, P381, DOI 10.1023/A:1007772905696;ADAMS RE, 2006, SOC SCI MED, V62, P176, DOI 10.1016/J.SOCSCIMED.2005.05.008;ADAMS RE, 2005, J COMMUNITY PSYCHOL, V33, P175, DOI 10.1002/JCOP.20030;ADAMS RE, 2006, J NERV MENT DIS, V194, P485, DOI 10.1097/01.NMD.0000228503.95503.E9;ANONYMOUS, 2000, MMWR RECOMM REP, V49, P1;ANONYMOUS, 2009, SURVEY METHODOLOGY;ANONYMOUS, 2002, …	OBJECTIVES: TO HELP IMPROVE DISASTER PLANNING AND RESEARCH, WE STUDIED PSYCHOSOCIAL PREDICTORS OF TERRORISM FEAR AND PREPAREDNESS AMONG NEW YORK CITY RESIDENTS AFTER THE WORLD TRADE CENTER DISASTER (WTCD). METHOD: WE CONDUCTED A RANDOM CROSS-SECTIONAL SURVEY OF 1,681 ADULTS INTERVIEWED 2 YEARS AFTER THE WTCD. PARTICIPANTS WERE LIVING IN NEW YORK CITY AT THE TIME OF THE ATTACK AND EXPOSED TO ONGOI…	GEISINGER HLTH SYST, CTR HLTH RES, DANVILLE, PA 17822 USA.; MT SINAI SCH MED, DEPT GEN INTERNAL MED, NEW YORK, NY USA.; MT SINAI SCH MED, DEPT PEDIAT, NEW YORK, NY USA.; NEW YORK ACAD MED, DIV HLTH POLICY, NEW YORK, NY USA.; FLORIDA STATE UNIV, SCH SOCIAL WORK, TALLAHASSEE, FL 32306 USA.; UNIV MICHIGAN, DEPT EPIDEMIOL, ANN ARBOR, MI 48109 USA.; UNIV PENN, DEPT PSYCHIAT, PHILADELPHIA, PA 19104 USA…	BIOTERRORISM; COMMUNITY DISASTERS; MENTAL HEALTH; PREPAREDNESS; PUBLIC HEALTH; RISK COMMUNICATION; TERRORISM		ARTICLE; PROCEEDINGS PAPER	POSTTRAUMATIC-STRESS-DISORDER; MENTAL-HEALTH-SERVICE; TRADE-CENTER DISASTER; MEDICATION USE; SEPTEMBER-11; INTERVENTIONS; BIOTERRORISM; ALCOHOL; TRAUMA; PTSD	J PUBLIC HEALTH MAN	J. PUBLIC HEALTH MANAG. PRACT.	ENGLISH	LIPPINCOTT WILLIAMS & WILKINS	2006	BOSCARINO, JA (CORRESPONDING AUTHOR), GEISINGER HLTH SYST, CTR HLTH RES, 100 N ACAD AVE, DANVILLE, PA 17822 USA.	1078-4659	JOURNAL OF PUBLIC HEALTH MANAGEMENT AND PRACTICE	52	FEAR OF TERRORISM AND PREPAREDNESS IN NEW YORK CITY 2 YEARS AFTER THE ATTACKS IMPLICATIONS FOR DISASTER PLANNING AND RESEARCH	12	ISI	GEISINGER HEALTH SYSTEM; ICAHN SCHOOL OF MEDICINE AT MOUNT SINAI; ICAHN SCHOOL OF MEDICINE AT MOUNT SINAI; NEW YORK ACADEMY OF MEDICINE; STATE UNIVERSITY SYSTEM OF FLORIDA; FLORIDA STATE UNIVERSITY; UNIVERSITY OF MICHIGAN SYSTEM; UNIVERSITY OF MICHIGAN; UNIVERSITY OF PENNSYLVANIA	NOTDECLARED	BOSCARINO JA, 2006, J PUBLIC HEALTH MAN	BOSCARINO JA, 2006, J PUBLIC HEALTH MAN
CONNOLLY S;STOLZMANN K;HEYWORTH L;SULLIVAN J;SHIMADA S;WEAVER K;LINDSAY J;BAUER M;MILLER C	ACIERNO R, 2016, DEPRESS ANXIETY, V33, P415, DOI 10.1002/DA.22476;BARNETT ML, 2018, JAMA-J AM MED ASSOC, V320, P2147, DOI 10.1001/JAMA.2018.12354;CASTRO A, 2020, J AFFECT DISORDERS, V260, P514, DOI 10.1016/J.JAD.2019.09.023;CHINN S, 2000, STAT MED, V19, P3127, DOI 10.1002/1097-0258(20001130)19:22<3127::AID-SIM784>3.3.CO;2-D;CHOI S, 2019, JAMA PSYCHIAT, V76, P654, DOI 10.1001/JAMAPSYCHIATRY.2019.0…	THE CURRENT STUDY EXAMINED PATIENT AND PROVIDER DIFFERENCES IN USE OF PHONE, VIDEO, AND IN-PERSON MENTAL HEALTH (MH) SERVICES. PARTICIPANTS INCLUDED PATIENTS WHO COMPLETED >= 1 MH APPOINTMENT WITHIN THE DEPARTMENT OF VETERANS AFFAIRS (VA) FROM 10/1/17-7/10/20 AND PROVIDERS WHO COMPLETED >= 100 VA MH APPOINTMENTS FROM 10/1/17-7/10/20. ADJUSTED ODDS RATIOS (AORS) ARE REPORTED OF PATIENTS AND PROVID…	VA BOSTON HEALTHCARE SYST, CTR HEALTHCARE ORG & IMPLEMENTAT RES CHOIR, 150 SOUTH HUNTINGTON AVE, BOSTON, MA 02130 USA.; HARVARD MED SCH, DEPT PSYCHIAT, BOSTON, MA 02115 USA.; VET HLTH ADM OFF CONNECTED CARE TELEHLTH, WASHINGTON, DC USA.; UNIV CALIF SAN DIEGO, DEPT HLTH SCI, SAN DIEGO, CA 92103 USA.; BOSTON UNIV, SCH PUBL HLTH, DEPT HLTH LAW POLICY & MANAGEMENT, BOSTON, MA 02215 USA.; VA BEDFORD H…	TELEHEALTH; TELEMENTAL HEALTH; COVID-19; VETERANS; DIGITAL DIVIDE	10.1037/amp0000895	ARTICLE	OBSESSIVE-COMPULSIVE DISORDER; POSTTRAUMATIC-STRESS-DISORDER; COGNITIVE-BEHAVIORAL THERAPY; TELEMEDICINE; DEPRESSION; SMOKING; TRIAL; WOMEN; CARE	AM PSYCHOL	AM. PSYCHOL.	ENGLISH	AMER PSYCHOLOGICAL ASSOC	2022	CONNOLLY, SL (CORRESPONDING AUTHOR), VA BOSTON HEALTHCARE SYST, CTR HEALTHCARE ORG & IMPLEMENTAT RES CHOIR, 150 SOUTH HUNTINGTON AVE, BOSTON, MA 02130 USA.	0003-066X	AMERICAN PSYCHOLOGIST	34	PATIENT AND PROVIDER PREDICTORS OF TELEMENTAL HEALTH USE PRIOR TO AND DURING THE COVID19 PANDEMIC WITHIN THE DEPARTMENT OF VETERANS AFFAIRS	77	ISI	US DEPARTMENT OF VETERANS AFFAIRS; VETERANS HEALTH ADMINISTRATION (VHA); HARVARD UNIVERSITY; VA BOSTON HEALTHCARE SYSTEM; HARVARD UNIVERSITY; HARVARD MEDICAL SCHOOL; UNIVERSITY OF CALIFORNIA SYSTEM; UNIVERSITY OF CALIFORNIA SAN DIEGO; BOSTON UNIVERSITY; UNIVERSITY OF MASSACHUSETTS SYSTEM; UNIVERSITY OF MASSACHUSETTS AMHERST; US DEPARTMENT OF VETERANS AFFAIRS; VETERANS HEALTH ADMINISTRATION (VHA);…	CTR HEALTHCARE ORG AND IMPLEMENTAT RES CHOIR	CONNOLLY SL, 2022, AM PSYCHOL	CONNOLLY SL, 2022, AM PSYCHOL
KRAVITZ R;PATERNITI D;EPSTEIN R;ROCHLEN A;BELL R;CIPRI C;GARCIA E;FELDMAN M;DUBERSTEIN P	ANONYMOUS, 1959, PRESENTATION SELF EV;ANONYMOUS, 2002, ANN INTERN MED, V136, P760;ATLAS SJ, 2009, ANN INTERN MED, V150, P325, DOI 10.7326/0003-4819-150-5-200903030-00008;BARBUI C, 2006, EPIDEMIOL PSICHIAT S, V15, P276, DOI 10.1017/S1121189X00002165;BELL RA, 2009, PATIENT ED COUNS, V10;BRADFORD DW, 2008, PSYCHIAT SERV, V59, P847, DOI 10.1176/PS.2008.59.8.847;BRODY DS, 1997, J GEN INTERN MED, V12, …	OBJECTIVE: TO IDENTIFY ATTITUDINAL AND INTERPERSONAL BARRIERS TO DEPRESSION CARE-SEEKING AND DISCLOSURE IN PRIMARY CARE AND IN SO DOING, EVALUATE THE PRIMARY CARE PARADIGM FOR DEPRESSION CARE IN THE UNITED STATES. METHODS: FIFTEEN QUALITATIVE FOCUS GROUP INTERVIEWS IN THREE CITIES. STUDY PARTICIPANTS WERE ENGLISH-SPEAKING MEN AND WOMEN AGED 25-64 WITH FIRST-HAND KNOWLEDGE OF DEPRESSION. TRANSCRIP…	UNIV CALIF DAVIS, SCH MED, DEPT INTERNAL MED, DIV GEN MED, SACRAMENTO, CA 95817 USA.; UNIV CALIF DAVIS, SCH MED, CTR HEALTHCARE POLICY & RES, SACRAMENTO, CA 95817 USA.; UNIV CALIF DAVIS, DEPT SOCIOL, DAVIS, CA 95616 USA.; UNIV ROCHESTER, SCH MED & DENT, DEPT FAMILY MED, ROCHESTER, NY USA.; UNIV ROCHESTER, SCH MED & DENT, DEPT PSYCHIAT & ONCOL, ROCHESTER, NY USA.; UNIV ROCHESTER, MED CTR, ROCHESTE…	DEPRESSION; QUALITATIVE RESEARCH; FOCUS GROUPS; PHYSICIAN-PATIENT INTERACTION; ACCESS TO CARE; TRUST; PRIMARY CARE; DISPARITIES	10.1016/j.pec.2010.05.007	ARTICLE	RANDOMIZED CONTROLLED-TRIAL; MENTAL-HEALTH; SOCIOECONOMIC-STATUS; CULTURAL-DIFFERENCES; GENERAL-PRACTICE; MEDICAL-CARE; PATIENT; QUALITY; COMMUNICATION; MANAGEMENT	PATIENT EDUC COUNS	PATIENT EDUC. COUNS.	ENGLISH	ELSEVIER IRELAND LTD	2011	KRAVITZ, RL (CORRESPONDING AUTHOR), UNIV CALIF DAVIS, SCH MED, DEPT INTERNAL MED, DIV GEN MED, 4150 V ST,SUITE 2400 PSSB, SACRAMENTO, CA 95817 USA.	0738-3991	PATIENT EDUCATION AND COUNSELING	50	RELATIONAL BARRIERS TO DEPRESSION HELPSEEKING IN PRIMARY CARE	82	ISI	UNIVERSITY OF CALIFORNIA SYSTEM; UNIVERSITY OF CALIFORNIA DAVIS; UNIVERSITY OF CALIFORNIA SYSTEM; UNIVERSITY OF CALIFORNIA DAVIS; UNIVERSITY OF CALIFORNIA SYSTEM; UNIVERSITY OF CALIFORNIA DAVIS; UNIVERSITY OF ROCHESTER; UNIVERSITY OF ROCHESTER; UNIVERSITY OF ROCHESTER; UNIVERSITY OF TEXAS SYSTEM; UNIVERSITY OF TEXAS AUSTIN; UNIVERSITY OF CALIFORNIA SYSTEM; UNIVERSITY OF CALIFORNIA DAVIS; UNIVERSI…	UNIV CALIF DAVIS	KRAVITZ RL, 2011, PATIENT EDUC COUNS	KRAVITZ RL, 2011, PATIENT EDUC COUNS
TIDEY J	AHNALLEN CG, 2012, PSYCHIAT RES, V196, P9, DOI 10.1016/J.PSYCHRES.2011.09.011;ANONYMOUS, 2007, ENDING TOBACCO PROBL;AUDRAIN-MCGOVERN J, 2014, BIOL PSYCHIAT, V76, P689, DOI 10.1016/J.BIOPSYCH.2014.04.018;AUDRAIN-MCGOVERN J, 2012, NICOTINE TOB RES, V14, P1187, DOI 10.1093/NTR/NTS017;AUDRAIN-MCGOVERN J, 2011, ADDICTION, V106, P178, DOI 10.1111/J.1360-0443.2010.03113.X;BENOWITZ NL, 2013, TOB CONTROL,…	SERIOUS MENTAL ILLNESS (SMI) IS ASSOCIATED WITH DISPROPORTIONATELY HIGH RATES OF CIGARETTE SMOKING. THE IDENTIFICATION OF FACTORS THAT CONTRIBUTE TO PERSISTENT SMOKING IN PEOPLE WITH SMI MAY LEAD TO THE DEVELOPMENT AND ADOPTION OF TOBACCO CONTROL POLICIES AND TREATMENT APPROACHES THAT HELP THESE SMOKERS QUIT. THIS COMMENTARY EXAMINES FACTORS UNDERLYING SMOKING PERSISTENCE IN PEOPLE WITH SMI FROM …	BROWN UNIV, DEPT PSYCHIAT & HUMAN BEHAV, CTR ALCOHOL & ADDICT STUDIES, PROVIDENCE, RI 02912 USA.; 121 SOUTH MAIN ST,BOX G-S121-5, PROVIDENCE, RI 02912 USA.;	SCHIZOPHRENIA; DEPRESSION; COMORBIDITY; CIGARETTE SMOKING; TOBACCO DEPENDENCE; TOBACCO CONTROL; SOCIOECONOMIC STATUS; BEHAVIORAL ECONOMICS	10.1016/j.ypmed.2016.05.015	ARTICLE	CIGARETTE-SMOKING; ALTERNATIVE REINFORCERS; CONTINGENCY MANAGEMENT; TOBACCO SMOKING; USE DISORDERS; SUBSTANCE USE; REWARD VALUE; SCHIZOPHRENIA; SMOKERS; NICOTINE	PREV MED	PREV. MED.	ENGLISH	ACADEMIC PRESS INC ELSEVIER SCIENCE	2016	TIDEY, JW (CORRESPONDING AUTHOR), BROWN UNIV, DEPT PSYCHIAT & HUMAN BEHAV, CTR ALCOHOL & ADDICT STUDIES, PROVIDENCE, RI 02912 USA.; TIDEY, JW (CORRESPONDING AUTHOR), 121 SOUTH MAIN ST,BOX G-S121-5, PROVIDENCE, RI 02912 USA.	0091-7435	PREVENTIVE MEDICINE	8	A BEHAVIORAL ECONOMIC PERSPECTIVE ON SMOKING PERSISTENCE IN SERIOUS MENTAL ILLNESS	92	ISI	BROWN UNIVERSITY	BROWN UNIV;JW (CORRESPONDING AUTHOR)	TIDEY JW, 2016, PREV MED	TIDEY JW, 2016, PREV MED
PHANTHUNANE P;WHITEFORD H;VOS T;BERTRAM M	AKOBUNDU E, 2006, PHARMACOECONOMICS, V24, P869, DOI 10.2165/00019053-200624090-00005;ANDERSEN HS, 2004, ACTA PSYCHIAT SCAND, V110, P4, DOI 10.1111/J.1600-0447.2004.00436_1.X;ANDREWS G, 1985, ARCH GEN PSYCHIAT, V42, P537;ANONYMOUS, MACR IND;ANONYMOUS, IMP EC IND;ANONYMOUS, 2005, MENT HLTH ATL;ANONYMOUS, 2017, THE WORLD HEALTH REPORT 2017. LEISHMANIOSE. IN;ANONYMOUS, SURVEY SEVERITY QUAL;ANONYMOUS,…	BACKGROUND: EVIDENCE CONSISTENTLY INDICATES THAT SCHIZOPHRENIA IS A COSTLY DISEASE ALTHOUGH IT IS NOT A HIGH PREVALENCE DISORDER. THERE ARE A FEW STUDIES IN DEVELOPING COUNTRIES BUT NO STUDY IN THAILAND REPORTING THE COST OF SCHIZOPHRENIA FROM A SOCIETAL PERSPECTIVE. HEALTH POLICY MAKERS NEED TO BE AWARE OF THE COST OF HEALTH CARE FOR PEOPLE WITH SCHIZOPHRENIA AS WELL AS THE ECONOMIC BURDEN ON PA…	UNIV QUEENSLAND, SCH POPULAT HLTH, CTR BURDEN DIS COST EFFECTIVENESS, HERSTON, QLD 4006, AUSTRALIA.; MINIST PUBL HLTH, SETTING PRIOR USING INFORMAT COST EFFECTIVENESS S, NONTHABURI, THAILAND.; NARESUAN UNIV, FAC MANAGEMENT & INFORMAT SCI, PHITSANULOK, THAILAND.; PK CTR MENTAL HLTH, QUEENSLAND CTR MENTAL HLTH RES, SUMMER PK, QLD, AUSTRALIA.;			ARTICLE	HEALTH-ORGANIZATION HEALTH; MOBILE CRISIS SERVICES; COST-OF-ILLNESS; PSYCHIATRIC-DISORDERS; WORK; PEOPLE; IMPACT	J MENT HEALTH POLICY	J. MENT. HEALTH POLICY ECON.	ENGLISH	INT CTR MENTAL HEALTH POLICY & ECONOMICS-ICMPE	2012	PHANTHUNANE, P (CORRESPONDING AUTHOR), UNIV QUEENSLAND, SCH POPULAT HLTH, CTR BURDEN DIS COST EFFECTIVENESS, HERSTON, QLD 4006, AUSTRALIA.	1091-4358	JOURNAL OF MENTAL HEALTH POLICY AND ECONOMICS	23	ECONOMIC BURDEN OF SCHIZOPHRENIA EMPIRICAL ANALYSES FROM A SURVEY IN THAILAND	15	ISI	UNIVERSITY OF QUEENSLAND; MINISTRY OF PUBLIC HEALTH - THAILAND; NARESUAN UNIVERSITY; QUEENSLAND CENTRE FOR MENTAL HEALTH RESEARCH	UNIV QUEENSLAND	PHANTHUNANE P, 2012, J MENT HEALTH POLICY	PHANTHUNANE P, 2012, J MENT HEALTH POLICY
RUSCIO A;HALLION L;LIM C;AGUILAR-GAXIOLA S;AL-HAMZAWI A;ALONSO J;ANDRADE L;BORGES G;BROMET E;BUNTING B;DE A J;DEMYTTENAERE K;FLORESCU S;DE G G;GUREJE O;HARO J;HE Y;HINKOV H;HU C;DE J P;KARAM E;LEE S;LEPINE J;LEVINSON D;MNEIMNEH Z;NAVARRO-MATEU F;POSADA-VILLA J;SLADE T;STEIN D;TORRES Y;UDA H;WOJTYNIAK B;KESSLER R;CHATTERJI S;SCOTT K	AKISKAL HS, 1998, ACTA PSYCHIAT SCAND, V98, P66, DOI 10.1111/J.1600-0447.1998.TB05969.X;ANGEL R, 1987, CULT MED PSYCHIAT, V11, P465, DOI 10.1007/BF00048494;ANONYMOUS, 2002, STRUCTURE CLINICAL INTERVIEW FOR DSM-IV-TR AXIS I DISORDERS-NON-PATIENT EDITION (SCID-I/NP, 11/2002 REVISION);ANONYMOUS, 2013, PSYCHOL MED, DOI DOI 10.1017/S003329171200147X;ANONYMOUS, PROF SOFTW SURV DAT;ANONYMOUS, 2008, WHO …	IMPORTANCE GENERALIZED ANXIETY DISORDER (GAD) IS POORLY UNDERSTOOD COMPARED WITH OTHER ANXIETY DISORDERS, AND DEBATES PERSIST ABOUT THE SERIOUSNESS OF THIS DISORDER. FEW DATA EXIST ON GAD OUTSIDE A SMALL NUMBER OF AFFLUENT, INDUSTRIALIZED NATIONS. NO POPULATION-BASED DATA EXIST ON GAD AS IT IS CURRENTLY DEFINED IN DSM-5. OBJECTIVE TO PROVIDE THE FIRST EPIDEMIOLOGIC DATA ON DSM-5 GAD AND EXPLORE C…	UNIV PENN, DEPT PSYCHOL, STEPHEN A LEVIN BLDG,425 S UNIV AVE, PHILADELPHIA, PA 19104 USA.; UNIV PITTSBURGH, DEPT PSYCHOL, PITTSBURGH, PA 15260 USA.; UNIV OTAGO, DEPT PSYCHOL MED, DUNEDIN, OTAGO, NEW ZEALAND.; UNIV CALIF DAVIS, CTR REDUCING HLTH DISPAR, HLTH SYST, SACRAMENTO, CA 95817 USA.; AL QADISIYA UNIV, COLL MED, DIWANIA GOVERNORATE, IRAQ.; HOSP MAR MED RES INST, INST MUNICIPAL INVEST MED, BA…		10.1001/jamapsychiatry.2017.0056	ARTICLE	AGE-OF-ONSET; MAJOR DEPRESSION; MENTAL-DISORDERS; 12-MONTH PREVALENCE; LIFETIME PREVALENCE; IV DISORDERS; PRIMARY-CARE; COMORBIDITY; CULTURE; HEALTH	JAMA PSYCHIAT	JAMA PSYCHIATRY	ENGLISH	AMER MEDICAL ASSOC	2017	RUSCIO, AM (CORRESPONDING AUTHOR), UNIV PENN, DEPT PSYCHOL, STEPHEN A LEVIN BLDG,425 S UNIV AVE, PHILADELPHIA, PA 19104 USA.	2168-622X	JAMA PSYCHIATRY	262	CROSSSECTIONAL COMPARISON OF THE EPIDEMIOLOGY OF IDSMII5I GENERALIZED ANXIETY DISORDER ACROSS THE GLOBE	74	ISI	UNIVERSITY OF PENNSYLVANIA; PENNSYLVANIA COMMONWEALTH SYSTEM OF HIGHER EDUCATION (PCSHE); UNIVERSITY OF PITTSBURGH; UNIVERSITY OF OTAGO; UNIVERSITY OF CALIFORNIA SYSTEM; UNIVERSITY OF CALIFORNIA DAVIS; UNIVERSITY OF AL-QADISIYAH; HOSPITAL DEL MAR RESEARCH INSTITUTE; HOSPITAL DEL MAR; POMPEU FABRA UNIVERSITY; CIBER - CENTRO DE INVESTIGACION BIOMEDICA EN RED; CIBERESP; UNIVERSIDADE DE SAO PAULO; ST…	UNIV PENN	RUSCIO AM, 2017, JAMA PSYCHIAT	RUSCIO AM, 2017, JAMA PSYCHIAT
CARTER J;STRANG J;FRISSA S;HAYES R;HATCH S;HOTOPF M	AGRAWAL A, 2007, ADDICTION, V102, P94, DOI 10.1111/J.1360-0443.2006.01630.X;ANDERSON P, 2006, DRUG ALCOHOL REV, V25, P489, DOI 10.1080/09595230600944446;ANONYMOUS, 2009, RELATING LATENT CLAS;ANONYMOUS, 2007, STAT STAT SOFTW REL;BABOR T.F., 2001, PRIMARY CARE, V2ND;BACHMAN JG, 1999, HLTH RISKS DEV TRANS, P246;BARNEA Z, 1987, BRIT J ADDICT, V82, P891;CARLSON RG, 2005, DRUG ALCOHOL DEPEN, V79, P167,…	PURPOSE: THIS STUDY COMPARES POLYDRUG USE IN NATIONAL AND INNER CITY SAMPLES TO (1) EXAMINE PATTERNS OF USE UNDERLYING DIFFERENT PREVALENCE RATES AND (2) IDENTIFY HOW INNER CITY POLYDRUG USE NEEDS TARGETING IN WAYS NOT SUGGESTED BY NATIONAL RESEARCH. METHODS: LATENT CLASS ANALYSES ON INDICATORS OF ILLICIT DRUG USE IN THE LAST YEAR, HAZARDOUS ALCOHOL USE, AND CIGARETTE SMOKING WERE COMPARED BETWEE…	KINGS COLL LONDON, INST PSYCHIAT, DEPT PSYCHOL MED, WESTON EDUC CTR, LONDON SE5 9RJ, ENGLAND.; KINGS COLL LONDON, INST PSYCHIAT, ADDICT DEPT, LONDON SE5 9RJ, ENGLAND.; KINGS COLL LONDON, INST PSYCHIAT, HLTH SERV & POPULAT RES DEPT, LONDON SE5 9RJ, ENGLAND.;	ILLICIT DRUG USE; ALCOHOL ABUSE; CIGARETTE SMOKING; URBAN POPULATION; COMPARATIVE STUDY; ENGLAND; LONDON; PUBLIC HEALTH; SOCIOECONOMIC FACTORS	10.1016/j.annepidem.2013.07.012	ARTICLE	LATENT CLASS ANALYSIS; RECREATIONAL ECSTASY/MDMA USERS; DRUG-USE; SUBSTANCE USE; MENTAL-HEALTH; ALCOHOL; PREVALENCES	ANN EPIDEMIOL	ANN. EPIDEMIOL.	ENGLISH	ELSEVIER SCIENCE INC	2013	CARTER, JL (CORRESPONDING AUTHOR), KINGS COLL LONDON, INST PSYCHIAT, DEPT PSYCHOL MED, WESTON EDUC CTR, 10 CUTCOMBE RD, LONDON SE5 9RJ, ENGLAND.	1047-2797	ANNALS OF EPIDEMIOLOGY	26	COMPARISONS OF POLYDRUG USE AT NATIONAL AND INNER CITY LEVELS IN ENGLAND ASSOCIATIONS WITH DEMOGRAPHIC AND SOCIOECONOMIC FACTORS	23	ISI	UNIVERSITY OF LONDON; KING'S COLLEGE LONDON; UNIVERSITY OF LONDON; KING'S COLLEGE LONDON; UNIVERSITY OF LONDON; KING'S COLLEGE LONDON	KINGS COLL LONDON	CARTER JL, 2013, ANN EPIDEMIOL	CARTER JL, 2013, ANN EPIDEMIOL
THEIN K;HERBERHOLZ C;SANDAR W;YADANAR	ADDO R, 2018, PLOS ONE, V13, DOI 10.1371/JOURNAL.PONE.0199830;AE-NGIBISE KA, 2015, GLOBAL HEALTH ACTION, V8, DOI 10.3402/GHA.V8.26957;ANONYMOUS, 2003, INVESTING IN MENTAL HEALTH, DOI DOI 10.1093/HEAPRO/DAR059;ANONYMOUS, 2017, MENTAL HLTH ATLAS 20;ANONYMOUS, 2017, ENCY GEROPSYCHOLOGY;ANONYMOUS, 2016, FAC ADD AM SURG GEN;ARANDA MP, 1997, GERONTOLOGIST, V37, P342, DOI 10.1093/GERONT/37.3.342;ASSEMBL…	DRUG USE DISORDER (DUD) IS A SERIOUS HEALTH CONDITION THAT IMPOSES A HEAVY BURDEN ON THE PERSONS WHO HAVE A DRUG ADDICTION EXPERIENCE AND THEIR FAMILIES, ESPECIALLY IN COUNTRIES, SUCH AS MYANMAR, WHERE FEW FORMAL SUPPORT MECHANISMS ARE IN PLACE AND REPRESSIVE DRUG LAWS EXACERBATE THE SITUATION. YET, IN MYANMAR, LITTLE IS KNOWN ABOUT HOW INFORMAL CAREGIVERS ARE AFFECTED. THIS QUALITATIVE STUDY AIM…	NATL HLTH LAB, YANGON, MYANMAR.; CHULALONGKORN UNIV, FAC ECON, CTR EXCELLENCE HLTH ECON, BANGKOK, THAILAND.; UNIV PUBL HLTH, DEPT HLTH BEHAV & COMMUN, YANGON, MYANMAR.; UNIV PUBL HLTH, DEPT HLTH POLICY & MANAGEMENT, YANGON, MYANMAR.;		10.1371/journal.pone.0258183	ARTICLE	SUBSTANCE USE DISORDERS; CAREGIVER BURDEN; MENTAL-HEALTH; FAMILY CAREGIVERS; BIPOLAR DISORDER; STRESS; PEOPLE; SCHIZOPHRENIA; PERCEPTIONS; EXPERIENCES	PLOS ONE	PLOS ONE	ENGLISH	PUBLIC LIBRARY SCIENCE	2021	HERBERHOLZ, C (CORRESPONDING AUTHOR), CHULALONGKORN UNIV, FAC ECON, CTR EXCELLENCE HLTH ECON, BANGKOK, THAILAND.	1932-6203	PLOS ONE	4	CARING FOR PERSONS WITH DRUG USE DISORDERS IN THE YANGON REGION MYANMAR SOCIOECONOMIC AND PSYCHOLOGICAL BURDEN COPING STRATEGIES AND BARRIERS TO COPING	16	ISI	CHULALONGKORN UNIVERSITY	CHULALONGKORN UNIV	THEIN KZK, 2021, PLOS ONE	THEIN KZK, 2021, PLOS ONE
SPENCER A;OBLATH R;SHELDRICK R;NG L;SILVERSTEIN M;GARG A	AMERICAN PSYCHIATRIC ASSOCIATION, 2013, DIAGNOSTIC STAT MANU, DOI 10.1176/APPI.BOOKS.9780890425596, DOI 10.1176/APPI.BOOKS.9780890425596;APPLEGATE B, 1997, J AM ACAD CHILD PSY, V36, P1211, DOI 10.1097/00004583-199709000-00013;ASPAROUHOV T, 2009, STRUCT EQU MODELING, V16, P397, DOI 10.1080/10705510903008204;BARD DE, 2013, J DEV BEHAV PEDIATR, V34, P72, DOI 10.1097/DBP.0B013E31827A3A22;BIEDERMAN J,…	OBJECTIVE: ATTENTION-DEFICIT/HYPERACTIVITY DISORDER (ADHD) DISPROPORTIONATELY AFFECTS SOCIOECONOMICALLY DISADVANTAGED CHILDREN, BUT FOR UNCLEAR REASONS. WE EXAMINED THE ASSOCIATION BETWEEN SOCIAL DETERMINANTS OF HEALTH (SDH) AND ADHD SYMPTOMS IN A NATIONAL SAMPLE OF PRESCHOOL-AGE CHILDREN. METHODS: WE CONDUCTED EXPLORATORY FACTOR ANALYSIS (EFA) AND EXPLORATORY STRUCTURAL EQUATION MODELING (ESEM) …	BOSTON UNIV, SCH MED, BOSTON MED CTR, BOSTON, MA 02118 USA.; BOSTON UNIV, SCH PUBL HLTH, HLTH LAW POLICY & MANAGEMENT, BOSTON, MA USA.; UNIV CALIF LOS ANGELES, PSYCHOL, LOS ANGELES, CA 90024 USA.;	ADHD; PRESCHOOLERS; FAMILY; PARENTAL FUNCTIONING; SES	10.1177/1087054721996458	ARTICLE	ATTENTION-DEFICIT/HYPERACTIVITY-DISORDER; DEFICIT HYPERACTIVITY DISORDER; ADVERSE CHILDHOOD EXPERIENCES; PSYCHOMETRIC PROPERTIES; RATING-SCALE; RISK-FACTORS; METHYLPHENIDATE; COMORBIDITY; DIAGNOSIS; ADULTS	J ATTEN DISORD	J. ATTEN. DISORD.	ENGLISH	SAGE PUBLICATIONS INC	2022	SPENCER, AE (CORRESPONDING AUTHOR), BOSTON UNIV, SCH MED, BOSTON MED CTR, DEPT PSYCHIAT, DOCTORS OFF BLDG ROOM 909,720 HARRISON AVE, BOSTON, MA 02118 USA.	1087-0547	JOURNAL OF ATTENTION DISORDERS	4	SOCIAL DETERMINANTS OF HEALTH AND ADHD SYMPTOMS IN PRESCHOOLAGE CHILDREN	26	ISI	BOSTON UNIVERSITY; BOSTON MEDICAL CENTER; BOSTON UNIVERSITY; UNIVERSITY OF CALIFORNIA SYSTEM; UNIVERSITY OF CALIFORNIA LOS ANGELES	BOSTON UNIV	SPENCER AE, 2022, J ATTEN DISORD	SPENCER AE, 2022, J ATTEN DISORD
HSU M;JUNG O;KWAN L;JEGEDE O;MARTIN B;MALHOTRA A;SUZUKI J	ALEXANDER K, 2021, SUBST ABUSE TREAT PR, V16, DOI 10.1186/S13011-021-00395-6;ALTEKRUSE SF, 2020, PLOS ONE, V15, DOI 10.1371/JOURNAL.PONE.0227966;AMERICAN SOCIETY OF ADDICTION MEDICINE, 2015, NAT PRACT GUID US ME;ATWOOD EMILY C, 2016, HOSP PEDIATR, V6, P626;BAGLEY SM, 2023, J ADOLESCENT HEALTH, V72, P105, DOI 10.1016/J.JADOHEALTH.2022.08.026;BELLAMY C.D., 2021, SOCIAL WORK IN MENTAL HEALTH, V19, P…	BACKGROUND: ACHIEVING EQUITABLE ACCESS TO MEDICATIONS FOR OPIOID USE DISORDER (MOUD) SUCH AS BUPRENORPHINE IS A PRESSING ISSUE. EVIDENCE SUGGESTS DISPARITIES IN MOUD ACCESS BASED ON RACE AND SOCIOECONOMIC STATUS, FURTHER EXACERBATED BY THE COVID-19 PANDEMIC. HOWEVER, THE DRIVERS BEHIND THIS ACCESS GAP REMAIN POORLY UNDERSTOOD. THIS STUDY EXPLORES BARRIERS TO TREATMENT ACCESS AMONG INDIVIDUALS WIT…	GREATER LOS ANGELES VA MED CTR, DEPT PSYCHIAT, LOS ANGELES, CA USA.; EMORY UNIV, SCH MED, DEPT PSYCHIAT, ATLANTA, GA USA.; UNIV CALIF LOS ANGELES, FIELDING SCH PUBL HLTH, DEPT HLTH POLICY & MANAGEMENT, LOS ANGELES, CA USA.; COLUMBIA UNIV, VAGELOS COLL PHYS & SURG, NEW YORK, NY USA.; YALE SCH MED, DEPT PSYCHIAT, NEW HAVEN, CT USA.; BRIGHAM & WOMENS HOSP, DIV ADDICT PSYCHIAT, BOSTON, MA USA.; 11301…	MEDICATIONS FOR OPIOID USE DISORDER; BUPRENORPHINE; HEALTH EQUITY; TREATMENT ACCESS; OPIOID USE DISORDER	10.1016/j.josat.2023.209216	ARTICLE	CHOOSING BUPRENORPHINE; PATIENT PERSPECTIVES; METHADONE TREATMENT; ADDICTION; STIGMA; RACE	J SUBST USE ADDICT T	J. SUBST. USE ADDICT. TREAT.	ENGLISH	ELSEVIER SCIENCE INC	2024	HSU, MC (CORRESPONDING AUTHOR), 11301 WILSHIRE BLVD,BLDG 210A, LOS ANGELES, CA 90073 USA.	2949-8767	JOURNAL OF SUBSTANCE USE & ADDICTION TREATMENT	8	ACCESS CHALLENGES TO OPIOID USE DISORDER TREATMENT AMONG INDIVIDUALS EXPERIENCING HOMELESSNESS VOICES FROM THE STREETS	157	ISI	US DEPARTMENT OF VETERANS AFFAIRS; VETERANS HEALTH ADMINISTRATION (VHA); VA GREATER LOS ANGELES HEALTHCARE SYSTEM; EMORY UNIVERSITY; UNIVERSITY OF CALIFORNIA SYSTEM; UNIVERSITY OF CALIFORNIA LOS ANGELES; COLUMBIA UNIVERSITY; YALE UNIVERSITY; HARVARD UNIVERSITY; BRIGHAM AND WOMEN'S HOSPITAL	MC (CORRESPONDING AUTHOR)	HSU MC, 2024, J SUBST USE ADDICT T	HSU MC, 2024, J SUBST USE ADDICT T
DILER R;MERRANKO J;HAFEMAN D;GOLDSTEIN T;GOLDSTEIN B;HOWER H;GILL M;AXELSON D;RYAN N;STROBER M;KELLER M;YEN S;HUNT J;WEINSTOCK L;IYENGAR S;BIRMAHER B	AKEE RKQ, 2010, AM ECON J-APPL ECON, V2, P86, DOI 10.1257/APP.2.1.86;ANONYMOUS, 1994, AM PSYCHIATR ASSOC;AXELSON D, 2003, J CHILD ADOL PSYCHOP, V13, P463, DOI 10.1089/104454603322724850;AXELSON D, 2006, ARCH GEN PSYCHIAT, V63, P1139, DOI 10.1001/ARCHPSYC.63.10.1139;AXELSON DA, 2011, J AM ACAD CHILD PSY, V50, P1001, DOI 10.1016/J.JAAC.2011.07.005;BERGSTRALH E., 2007, COMPUTERIZED MATCHIN;BIRMAHER …	BACKGROUND: TO IDENTIFY PROSPECTIVELY ASCERTAINED INDIVIDUAL AND FAMILY FACTORS THAT ARE ASSOCIATED WITH IMPROVEMENT IN BIPOLAR DISORDER (BD) AMONG YOUTHS WHO INITIALLY PRESENTED WITH POOR COURSE. METHODS: 82 YOUTHS WITH BD WITH PERSISTENT POOR MOOD SYMPTOMATOLOGY ("PREDOMINANTLY ILL COURSE") WERE COMPARED TO 70 YOUTHS WITH BD WHO AT INTAKE HAD POOR COURSE, BUT SHOWED IMPROVEMENT DURING THE FOLLO…	UNIV PITTSBURGH, WESTERN PSYCHIAT HOSP, DEPT PSYCHIAT, SCH MED, 3811 OHARA ST, PITTSBURGH, PA 15213 USA.; UNIV TORONTO, FAC MED, SUNNYBROOK HLTH SCI CTR, DEPT PSYCHIAT, 2075 BAYVIEW AVE,FG 53, TORONTO, ON M4N 3M5, CANADA.; BROWN UNIV, WARREN ALPERT MED SCH, DEPT PSYCHIAT & HUMAN BEHAV, BOX G BH, PROVIDENCE, RI 02912 USA.; BROWN UNIV, SCH PUBL HLTH, DEPT HLTH SERV POLICY & PRACTICE, 121 SOUTH MAIN…	BIPOLAR DISORDER; LONGITUDINAL COURSE; DISEASE PROGNOSIS; PROSPECTIVE COHORT STUDY; SOCIOECONOMIC STATUS; PARENTAL PSYCHOPATHOLOGY	10.1016/j.jad.2022.01.058	ARTICLE	GLOBAL ASSESSMENT SCALE; STRESSFUL LIFE EVENTS; I DISORDER; PSYCHIATRIC-DISORDERS; HIGH-LEVEL; CHILDREN; ADOLESCENT; PREDICTORS; CHILDHOOD; HISTORY	J AFFECT DISORDERS	J. AFFECT. DISORD.	ENGLISH	ELSEVIER	2022	DILER, RS (CORRESPONDING AUTHOR), UNIV PITTSBURGH, UPMC WESTERN PSYCHIAT HOSP, PITTSBURGH, PA 15213 USA.	0165-0327	JOURNAL OF AFFECTIVE DISORDERS	4	HIGHER SOCIOECONOMIC STATUS AND LESS PARENTAL PSYCHOPATHOLOGY IMPROVE PROGNOSIS IN YOUTHS WITH BIPOLAR DISORDER	302	ISI	PENNSYLVANIA COMMONWEALTH SYSTEM OF HIGHER EDUCATION (PCSHE); UNIVERSITY OF PITTSBURGH; WESTERN PSYCHIATRIC INSTITUTE AND CLINIC OF UPMC; UNIVERSITY OF TORONTO; SUNNYBROOK HEALTH SCIENCE CENTER; SUNNYBROOK RESEARCH INSTITUTE; BROWN UNIVERSITY; BROWN UNIVERSITY; UNIVERSITY OF CALIFORNIA SYSTEM; UNIVERSITY OF CALIFORNIA SAN DIEGO; UNIVERSITY SYSTEM OF OHIO; OHIO STATE UNIVERSITY; NATIONWIDE CHILDRE…	UNIV PITTSBURGH	DILER RS, 2022, J AFFECT DISORDERS	DILER RS, 2022, J AFFECT DISORDERS
SAMBAMOORTHI U;BEAN-MAYBERRY B;FINDLEY P;YANO E;BANERJEA R	ANONYMOUS, EVIDENCE REPORT TECH;BANERJEA R, 2009, WOMEN HEALTH ISS, V19, P446, DOI 10.1016/J.WHI.2009.07.007;BEAN-MAYBERRY BA, 2006, WOMEN HEALTH ISS, V16, P22, DOI 10.1016/J.WHI.2005.12.002;BEAN-MAYBERRY B, 2007, J WOMENS HEALTH, V16, P1281, DOI 10.1089/JWH.2006.0284;BEAN-MAYBERRY BA, 2007, MIL MED, V172, P824, DOI 10.7205/MILMED.172.8.824;BEANMAYBERRY B, 2005, ACADEMYHEALTH ANN RE;BRITTLE C., 2…	OBJECTIVE: TO ANALYZE THE ASSOCIATION BETWEEN THE ORGANIZATIONAL FEATURES OF INTEGRATION OF PHYSICAL AND MENTAL HEALTHCARE IN WOMEN'S HEALTH CLINICS AND THE DIAGNOSIS OF DEPRESSION AMONG WOMEN VETERANS WITH OR AT RISK FOR CARDIOVASCULAR CONDITIONS (IE, DIABETES MELLITUS, HEART DISEASE, OR HYPERTENSION). STUDY DESIGN: RETROSPECTIVE AND OBSERVATIONAL SECONDARY DATA ANALYSES. METHODS: WE STUDIED 27,…	RUTGERS STATE UNIV, SCH SOCIAL WORK, NEW BRUNSWICK, NJ 08901 USA.; W VIRGINIA UNIV, DEPT PHARMACEUT SYST & POLICY, MORGANTOWN, WV 26506 USA.; DEPT VET AFFAIRS NEW JERSEY HLTH CARE SYST, HSR&D CTR HEALTHCARE KNOWLEDGE MANAGEMENT, E ORANGE, NJ USA.; MOREHOUSE SCH MED, DEPT COMMUNITY HLTH & PREVENT MED, ATLANTA, GA 30310 USA.; VA GREATER LOS ANGELES HEALTHCARE SYST, HSR&D CTR EXCELLENCE, SEPULVEDA, …			ARTICLE	MENTAL-HEALTH-CARE; CLINICS; DISORDERS; ILLNESS; MANAGEMENT; INNOVATION; QUALITY; GENDER	AM J MANAG CARE	AM. J. MANAG. CARE	ENGLISH	MANAGED CARE & HEALTHCARE COMMUNICATIONS LLC	2010	FINDLEY, PA (CORRESPONDING AUTHOR), RUTGERS STATE UNIV, SCH SOCIAL WORK, 536 GEORGE ST, NEW BRUNSWICK, NJ 08901 USA.	1088-0224	AMERICAN JOURNAL OF MANAGED CARE	12	ORGANIZATION OF CARE AND DIAGNOSED DEPRESSION AMONG WOMEN VETERANS	16	ISI	RUTGERS UNIVERSITY SYSTEM; RUTGERS UNIVERSITY NEW BRUNSWICK; WEST VIRGINIA UNIVERSITY; MOREHOUSE SCHOOL OF MEDICINE; US DEPARTMENT OF VETERANS AFFAIRS; VETERANS HEALTH ADMINISTRATION (VHA); VA GREATER LOS ANGELES HEALTHCARE SYSTEM; UNIVERSITY OF CALIFORNIA SYSTEM; UNIVERSITY OF CALIFORNIA LOS ANGELES; UNIVERSITY OF CALIFORNIA SYSTEM; UNIVERSITY OF CALIFORNIA LOS ANGELES	RUTGERS STATE UNIV	SAMBAMOORTHI U, 2010, AM J MANAG CARE	SAMBAMOORTHI U, 2010, AM J MANAG CARE
HALE D;SMITH G;BOWIE J;LAVEIST T;THORPE R	ANONYMOUS, 2015, INCOME POVERTY US 20;BARNES DM, 2013, SOC PSYCH PSYCH EPID, V48, P1941, DOI 10.1007/S00127-013-0718-7;HAYWARD MD, 2000, AM SOCIOL REV, V65, P910, DOI 10.2307/2657519;KIM D, 2008, EPIDEMIOL REV, V30, P101, DOI 10.1093/EPIREV/MXN009;LANDRINE H, 2009, ETHNIC DIS, V19, P179;LAVEIST TA, 2005, J URBAN HEALTH, V82, PIII26, DOI 10.1093/JURBAN/JTI061;LAVEIST T, 2008, J URBAN HEALTH, V85, …	AFRICAN AMERICAN MEN REPORT LOWER LEVELS OF DEPRESSIVE SYMPTOMS THAT THEIR WHITE PEERS IN NATIONAL DATA. HOWEVER, THE VALUE OF THESE STUDIES IS OFTEN UNDERMINED BY DATA THAT CONFOUND RACE, SOCIOECONOMIC STATUS, AND SEGREGATION. WE SOUGHT TO DETERMINE WHETHER RACE DIFFERENCES IN DEPRESSIVE SYMPTOMS WERE PRESENT AFTER MINIMIZING THE EFFECTS OF SOCIOECONOMIC STATUS AND SEGREGATION WITHIN A COHORT OF…	HOPKINS CTR HLTH DISPAR SOLUT, PROGRAM RES MENS HLTH, BALTIMORE, MD USA.; JOHNS HOPKINS BLOOMBERG SCH PUBL HLTH, DEPT ENVIRONM HLTH & ENGN, BALTIMORE, MD USA.; JOHNS HOPKINS BLOOMBERG SCH PUBL HLTH, DEPT HLTH BEHAV & SOC, BALTIMORE, MD USA.; JOHNS HOPKINS BLOOMBERG SCH PUBL HLTH, HOPKINS CTR HLTH DISPAR SOLUT, BALTIMORE, MD USA.; TULANE UNIV, DEPT HLTH POLICY & MANAGEMENT, SCH PUBL HLTH & TROP ME…	DEPRESSIVE SYMPTOMS; DISPARITIES; MEN; RACE; SES	10.1097/FCH.0000000000000230	ARTICLE	EXPLORING HEALTH DISPARITIES; SOCIOECONOMIC-STATUS	FAM COMMUNITY HEALTH	FAM. COMMUNITY HEALTH	ENGLISH	LIPPINCOTT WILLIAMS & WILKINS	2019	HALE, D (CORRESPONDING AUTHOR), JOHNS HOPKINS BLOOMBERG SCH PUBL HLTH, 624 N BROADWAY,STE 708, BALTIMORE, MD 21205 USA.	0160-6379	FAMILY & COMMUNITY HEALTH	4	DISENTANGLING RACE AND PLACE IN DEPRESSIVE SYMPTOMS IN MEN	42	ISI	JOHNS HOPKINS UNIVERSITY; JOHNS HOPKINS UNIVERSITY; JOHNS HOPKINS BLOOMBERG SCHOOL OF PUBLIC HEALTH; JOHNS HOPKINS UNIVERSITY; JOHNS HOPKINS BLOOMBERG SCHOOL OF PUBLIC HEALTH; JOHNS HOPKINS UNIVERSITY; JOHNS HOPKINS BLOOMBERG SCHOOL OF PUBLIC HEALTH; TULANE UNIVERSITY	JOHNS HOPKINS BLOOMBERG SCH PUBL HLTH	HALE D, 2019, FAM COMMUNITY HEALTH	HALE D, 2019, FAM COMMUNITY HEALTH
LEE K;KIM G;HAM B	FERN?NDEZ-NIÂ¥O JA, 2019, PLOS ONE, V14, DOI 10.1371/JOURNAL.PONE.0219540;ANONYMOUS, 2015, 2015 SEOUL AIR QUALI;ANONYMOUS, 2013, 2013 SEOUL AIR QUALI;ANONYMOUS, 2012, 2012 SEOUL AIR QUALI;ANONYMOUS, 2014, 2014 SEOUL AIR QUALI;BRAITHWAITE I, 2019, ENVIRON HEALTH PERSP, V127, DOI 10.1289/EHP4595;FOX J., 2018, AN R COMPANION TO APPLIED REGRESSION, DOI DOI 10.1002/ICD.2032;GU XL, 2019, BRIT J PSYCHIA…	THIS STUDY USES MACHINE LEARNING AND POPULATION-BASED DATA TO ANALYZE MAJOR DETERMINANTS OF ANTIDEPRESSANT MEDICATION INCLUDING THE CONCENTRATION OF PARTICULATE MATTER UNDER 2.5 MU M (PM2.5). RETROSPECTIVE COHORT DATA CAME FROM KOREA NATIONAL HEALTH INSURANCE SERVICE CLAIMS DATA FOR 43,251 PARTICIPANTS, WHO WERE AGED 15-79 YEARS, LIVED IN THE SAME DISTRICTS OF SEOUL AND HAD NO HISTORY OF ANTIDEPR…	KOREA UNIV, AI CTR, COLL MED, SEOUL, SOUTH KOREA.; KOREA UNIV, GRAD SCH POLICY STUDIES, SEOUL, SOUTH KOREA.; KOREA UNIV, DEPT MENTAL HLTH, COLL MED, SEOUL, SOUTH KOREA.;	ANTIDEPRESSANT; NEIGHBORHOOD CONDITION; SOCIOECONOMIC SATISFACTION; PARTICULATE MATTER	10.1016/j.jpsychires.2022.01.011	ARTICLE		J PSYCHIATR RES	J. PSYCHIATR. RES.	ENGLISH	PERGAMON-ELSEVIER SCIENCE LTD	2022	HAM, BJ (CORRESPONDING AUTHOR), KOREA UNIV, ANAM HOSP, DEPT MENTAL HLTH, 73 GORYEODAE RO, SEOUL 02841, SOUTH KOREA.	0022-3956	JOURNAL OF PSYCHIATRIC RESEARCH	2	ASSOCIATIONS OF ANTIDEPRESSANT MEDICATION WITH ITS VARIOUS PREDICTORS INCLUDING PARTICULATE MATTER MACHINE LEARNING ANALYSIS USING NATIONAL HEALTH INSURANCE DATA	147	ISI	KOREA UNIVERSITY; KOREA UNIVERSITY MEDICINE (KU MEDICINE); KOREA UNIVERSITY; KOREA UNIVERSITY; KOREA UNIVERSITY MEDICINE (KU MEDICINE)	KOREA UNIV	LEE KS, 2022, J PSYCHIATR RES	LEE KS, 2022, J PSYCHIATR RES
TURAN B;ROGERS A;RICE W;ATKINS G;COHEN M;WILSON T;ADIMORA A;MERENSTEIN D;ADEDIMEJI A;WENTZ E;OFOTOKUN I;METSCH L;TIEN P;JOHNSON M;TURAN J;WEISER S	BACON MC, 2005, CLIN DIAGN LAB IMMUN, V12, P1013, DOI 10.1128/CDLI.12.9.1013-1019.2005;BANTEYERGA H., 2004, YICHALALIKO EXPLORIN;BARKAN SE, 1998, EPIDEMIOLOGY, V9, P117, DOI 10.1097/00001648-199803000-00004;BATEY DS, 2016, AIDS PATIENT CARE ST, V30, P519, DOI 10.1089/APC.2016.0223;BEACH MC, 2006, J GEN INTERN MED, V21, P661, DOI 10.1111/J.1525-1497.2006.00399.X;BERGER BE, 2001, RES NURS HEALTH, V…	THERE IS INSUFFICIENT RESEARCH ON THE IMPACT OF PERCEIVED DISCRIMINATION IN HEALTHCARE SETTINGS ON ADHERENCE TO ANTIRETROVIRAL THERAPY (ART), PARTICULARLY AMONG WOMEN LIVING WITH HIV, AND EVEN LESS IS KNOWN ABOUT PSYCHOSOCIAL MECHANISMS THAT MAY MEDIATE THIS ASSOCIATION. CROSS-SECTIONAL ANALYSES WERE CONDUCTED IN A SAMPLE OF 1356 DIVERSE WOMEN LIVING WITH HIV ENROLLED IN THE WOMEN'S INTERAGENCY H…	UNIV ALABAMA BIRMINGHAM, DEPT PSYCHOL, 415 CAMPBELL HALL,1530 3RD AVE SOUTH, BIRMINGHAM, AL 35294 USA.; UNIV ALABAMA BIRMINGHAM, SCH PUBL HLTH, DEPT HLTH CARE ORG & POLICY, BIRMINGHAM, AL USA.; STROGER HOSP, DEPT MED, CHICAGO, IL USA.; SUNY DOWNSTATE MED CTR, DEPT COMMUNITY HLTH SCI, SCH PUBL HLTH, BROOKLYN, NY 11203 USA.; UNIV NORTH CAROLINA CHAPEL HILL, SCH MED, CHAPEL HILL, NC USA.; UNIV NORTH…	HIV; ADHERENCE; MENTAL HEALTH; STIGMA; DISCRIMINATION; DEPRESSION	10.1007/s10461-017-1957-5	ARTICLE	ANTIRETROVIRAL THERAPY ADHERENCE; SUBJECTIVE SOCIOECONOMIC-STATUS; SOCIAL SUPPORT; MENTAL-HEALTH; CLINICAL CARE; STIGMA; HIV/AIDS; PEOPLE; DEPRESSION; SAMPLE	AIDS BEHAV	AIDS BEHAV.	ENGLISH	SPRINGER/PLENUM PUBLISHERS	2017	TURAN, B (CORRESPONDING AUTHOR), UNIV ALABAMA BIRMINGHAM, DEPT PSYCHOL, 415 CAMPBELL HALL,1530 3RD AVE SOUTH, BIRMINGHAM, AL 35294 USA.	1090-7165	AIDS AND BEHAVIOR	71	ASSOCIATION BETWEEN PERCEIVED DISCRIMINATION IN HEALTHCARE SETTINGS AND HIV MEDICATION ADHERENCE MEDIATING PSYCHOSOCIAL MECHANISMS	21	ISI	UNIVERSITY OF ALABAMA SYSTEM; UNIVERSITY OF ALABAMA BIRMINGHAM; UNIVERSITY OF ALABAMA SYSTEM; UNIVERSITY OF ALABAMA BIRMINGHAM; JOHN H STROGER JUNIOR HOSPITAL COOK COUNTY; STATE UNIVERSITY OF NEW YORK (SUNY) SYSTEM; SUNY DOWNSTATE HEALTH SCIENCES UNIVERSITY; UNIVERSITY OF NORTH CAROLINA; UNIVERSITY OF NORTH CAROLINA CHAPEL HILL; UNIVERSITY OF NORTH CAROLINA SCHOOL OF MEDICINE; UNIVERSITY OF NORTH…	UNIV ALABAMA BIRMINGHAM	TURAN B, 2017, AIDS BEHAV	TURAN B, 2017, AIDS BEHAV
QI X;WANG J;LIU J;AMPORFRO D;WANG K;LIU H;SHAH S;WU Q;HAO Y	ALARCON D., ASSESSING CONVERGENT, P39;ALIZADEH A, 2020, BMC PSYCHIATRY, V20, DOI 10.1186/S12888-020-02889-2;AMERICAN PSYCHIATRIC ASSOCIATION, 1998, DIAGNOSTIC STAT MANU;AN YY, 2021, J AFFECT DISORDERS, V282, P836, DOI 10.1016/J.JAD.2020.12.060;ANONYMOUS, 2020, CARING HLTH CARE WOR, P10;ANONYMOUS, 2014, A TREATMENT IMPROVEMENT PROTOCOL: TRAUMA-INFORMED CARE IN BEHAVIORAL HEALTH SERVICES (HHS PUB. …	OBJECTIVES THIS STUDY AIMED TO EXAMINE THE PREVALENCE OF PERITRAUMATIC STRESS SYMPTOMS (PTSSS), PERCEIVED THREAT, SOCIAL SUPPORT AND FACTORS CONTRIBUTING TO CLINICALLY SIGNIFICANT PTSS AMONG FRONTLINE COVID-19 HEALTHCARE WORKERS (HCWS) IN CHINA. DESIGN AND SETTING AN ONLINE SURVEY THROUGH SELF-ADMINISTERED QUESTIONNAIRES WAS CONDUCTED FROM 18 FEBRUARY TO 4 MARCH 2020, DURING THE OUTBREAK OF COVID…	HARBIN MED UNIV, HLTH MANAGEMENT COLL, DEPT HLTH POLICY, HARBIN, HEILONGJIANG, PEOPLES R CHINA.; HARBIN MED UNIV, SCH PUBL HLTH, DEPT SOCIAL MED, HARBIN, HEILONGJIANG, PEOPLES R CHINA.;	COVID-19; HEALTH & SAFETY; PUBLIC HEALTH; DEPRESSION & MOOD DISORDERS	10.1136/bmjopen-2020-047753	ARTICLE	POSTTRAUMATIC-STRESS; MENTAL-HEALTH; SOCIAL SUPPORT; MEDICAL STAFF; DISORDER; SURVIVORS; BURNOUT; IMPACT; RESILIENCE; EPIDEMIC	BMJ OPEN	BMJ OPEN	ENGLISH	BMJ PUBLISHING GROUP	2022	WU, QH; HAO, YH (CORRESPONDING AUTHOR), HARBIN MED UNIV, HLTH MANAGEMENT COLL, DEPT HLTH POLICY, HARBIN, HEILONGJIANG, PEOPLES R CHINA.; WU, QH; HAO, YH (CORRESPONDING AUTHOR), HARBIN MED UNIV, SCH PUBL HLTH, DEPT SOCIAL MED, HARBIN, HEILONGJIANG, PEOPLES R CHINA.	2044-6055	BMJ OPEN	7	FACTORS ASSOCIATED WITH PERITRAUMATIC STRESS SYMPTOMS AMONG THE FRONTLINE HEALTHCARE WORKERS DURING THE OUTBREAK OF COVID19 IN CHINA	12	ISI	HARBIN MEDICAL UNIVERSITY; HARBIN MEDICAL UNIVERSITY	NOTREPORTED;HARBIN MED UNIV;NOTREPORTED;HARBIN MED UNIV	QI XY, 2022, BMJ OPEN	QI XY, 2022, BMJ OPEN
MUNTANER C;LI Y;XUE X;THOMPSON T;CHUNG H;O'CAMPO P	ANDERSSON F., 2003, WORKER ADVANCEMENT L;BERNSTEIN J, 1999, LOW WAGE LABOR MARKE;BROWN GW, 1997, PSYCHOL MED, V27, P21, DOI 10.1017/S0033291796004060;CARNEVALE A.P., 2001, LOW WAGE WORKERS IN THE NEW ECONOMY, P45;*CMMS, 2004, NURS HOM COMP;COOPER CL, 1998, NURSING STANDARD, V12, P11;DAWSON S, 2001, CHEATING DIGNITY DIR;DE JONGE J, 1999, HUM RELAT, V52, P95, DOI 10.1177/001872679905200106;DEJONGE …	LOW-WAGE WORKERS REPRESENT AN EVER-INCREASING PROPORTION OF THE US WORKFORCE. A WIDE SPECTRUM OF FIRMS DEMAND LOW-WAGE WORKERS, YET JUST 10 INDUSTRIES ACCOUNT FOR 70% OF ALL LOW-PAYING JOBS. THE BULK OF THESE JOBS ARE IN THE SERVICES AND RETAIL SALES INDUSTRIES. IN HEALTH SERVICES, 60% OF ALL WORKERS ARE LOW-PAID, WITH NURSING AIDES, ORDERLIES, PERSONAL ATTENDANTS, AND HOME CARE AIDES EARNING AN …	CTR ADDICT & MENTAL HLTH, SOCIAL EQU & HLTH SECT, TORONTO, ON, CANADA.; UNIV MARYLAND, COLLEGE PK, MD 20742 USA.; JOHNS HOPKINS UNIV, BLOOMBERG SCH PUBL HLTH, BALTIMORE, MD 21218 USA.; JOHNS HOPKINS UNIV, BLOOMBERG SCH PUBL HLTH, DEPT HLTH POLICY & MANAGEMENT, BALTIMORE, MD 21218 USA.;	DEPRESSION; SOCIOECONOMIC POSITION; WORK ORGANIZATION; CROSS-CLASSIFIED; NURSE ASSISTANTS; PRECARIOUS WORK; USA	10.1016/j.socscimed.2006.03.042	ARTICLE	PSYCHOSOCIAL WORK-ENVIRONMENT; UNITED-STATES; JOB DEMANDS; STRESS; HEALTH; MODEL; DISORDERS; STRAIN; SAFETY; SAMPLE	SOC SCI MED	SOC. SCI. MED.	ENGLISH	PERGAMON-ELSEVIER SCIENCE LTD	2006	MUNTANER, C (CORRESPONDING AUTHOR), CTR ADDICT & MENTAL HLTH, SOCIAL EQU & HLTH SECT, TORONTO, ON, CANADA.	0277-9536	SOCIAL SCIENCE & MEDICINE	30	COUNTY AND ORGANIZATIONAL PREDICTORS OF DEPRESSION SYMPTOMS AMONG LOWINCOME NURSING ASSISTANTS IN THE USA	63	ISI	UNIVERSITY OF TORONTO; CENTRE FOR ADDICTION AND MENTAL HEALTH - CANADA; UNIVERSITY SYSTEM OF MARYLAND; UNIVERSITY OF MARYLAND COLLEGE PARK; JOHNS HOPKINS UNIVERSITY; JOHNS HOPKINS BLOOMBERG SCHOOL OF PUBLIC HEALTH; JOHNS HOPKINS UNIVERSITY; JOHNS HOPKINS BLOOMBERG SCHOOL OF PUBLIC HEALTH	CTR ADDICT AND MENTAL HLTH	MUNTANER C, 2006, SOC SCI MED	MUNTANER C, 2006, SOC SCI MED
EVANS-LACKO S;ZEBER J;GONZALEZ J;OLVERA R	ARMENTEROS JL, 1995, PSYCHOPHARMACOL BULL, V31, P383;BAUER MS, 2006, PSYCHIAT SERV, V57, P927, DOI 10.1176/APPI.PS.57.7.927;BIRMAHER B, 2006, ARCH GEN PSYCHIAT, V63, P175, DOI 10.1001/ARCHPSYC.63.2.175;BLADER JC, 2007, BIOL PSYCHIAT, V62, P107, DOI 10.1016/J.BIOPSYCH.2006.11.006;BLOW FC, 2004, 5 VET AFF SER MENT I;CORRELL CU, 2007, J AM ACAD CHILD PSY, V46, P687, DOI 10.1097/CHI.0B013E318040B25F;…	OBJECTIVE: THIS STUDY EXAMINES THE NUMBER AND TYPE OF MEDICAL COMORBIDITIES AMONG YOUTH DIAGNOSED WITH BIPOLAR DISORDER. METHOD: THIS IS A RETROSPECTIVE DATA ANALYSIS USING THE 2000-2001 THOMSON MEDSTAT MARKETSCAN MEDICAL CLAIMS AND ADMINISTRATIVE FILES. THE POPULATION INCLUDED A NATIONAL SAMPLE OF YOUTH (AGES 6-18 YEARS) FROM PRIVATELY INSURED FAMILIES WITHIN THE UNITED STATES. NUMBER OF CHRONIC…	JOHNS HOPKINS BLOOMBERG SCH PUBL HLTH, DEPT HLTH POLICY & MANAGEMENT, BALTIMORE, MD USA.; UNIV TEXAS HLTH SCI CTR SAN ANTONIO, DEPT PSYCHIAT, SAN ANTONIO, TX 78229 USA.;		10.4088/JCP.08m04871	ARTICLE	DSM-III-R; NATIONAL TRENDS; PRIMARY-CARE; ADOLESCENTS; CHILDREN; PREVALENCE; SCHIZOPHRENIA; VETERANS; IV	J CLIN PSYCHIAT	J. CLIN. PSYCHIATRY	ENGLISH	PHYSICIANS POSTGRADUATE PRESS	2009	EVANS-LACKO, SE (CORRESPONDING AUTHOR), KINGS COLL LONDON, INST PSYCHIAT, HLTH SERV RES DEPT, DE CRESPIGNY PK, LONDON SE5 8AF, ENGLAND.	0160-6689	JOURNAL OF CLINICAL PSYCHIATRY	44	MEDICAL COMORBIDITY AMONG YOUTH DIAGNOSED WITH BIPOLAR DISORDER IN THE UNITED STATES	70	ISI	JOHNS HOPKINS UNIVERSITY; JOHNS HOPKINS BLOOMBERG SCHOOL OF PUBLIC HEALTH; UNIVERSITY OF TEXAS SYSTEM; UNIVERSITY OF TEXAS HEALTH SCIENCE CENTER AT SAN ANTONIO	KINGS COLL LONDON	EVANS-LACKO SE, 2009, J CLIN PSYCHIAT	EVANS-LACKO SE, 2009, J CLIN PSYCHIAT
MAUSNER-DORSCH H;EATON W	ANONYMOUS, 1987, DIAGNOSTIC STAT MANU, V4TH;ANTHONY, 1992, J EMPLOYEE ASSISTANC, V1, P148;BADAWI MA, 1999, SOC PSYCH PSYCH EPID, V34, P91, DOI 10.1007/S001270050117;BURVILL PW, 1995, EPIDEMIOL REV, V17, P21, DOI 10.1093/OXFORDJOURNALS.EPIREV.A036178;EATON WW, 1990, J OCCUP ENVIRON MED, V32, P1079, DOI 10.1097/00043764-199011000-00006;EATON WW, 1997, ARCH GEN PSYCHIAT, V54, P993;EATON WW, 1981, PU…	OBJECTIVES. THIS STUDY EXAMINED THE RELATION BETWEEN OCCUPATIONAL VARIABLES AND 3 FORMS OF DEPRESSION (MAJOR DEPRESSIVE EPISODE, DEPRESSIVE SYNDROME, AND DYSPHORIA). IT WAS HYPOTHESIZED THAT INDIVIDUALS WORKING IN OCCUPATIONS WITH HIGH PSYCHOLOGIC STRAIN (HIGH PSYCHOLOGIC DEMANDS AND LOW DECISION AUTHORITY) WOULD HAVE A HIGHER PREVALENCE OF DEPRESSION RELATIVE TO THOSE WORKING IN OCCUPATIONS WITH…	JOHNS HOPKINS UNIV, SCH PUBL HLTH, DEPT HLTH POLICY & MANAGEMENT, BALTIMORE, MD 21205 USA.; JOHNS HOPKINS UNIV, SCH PUBL HLTH, DEPT MENTAL HYG, BALTIMORE, MD USA.;		10.2105/AJPH.90.11.1765	ARTICLE	DIAGNOSTIC-INTERVIEW-SCHEDULE; OF-MENTAL-HEALTH; SOCIOECONOMIC-STATUS; MAJOR DEPRESSION; SEX-DIFFERENCES; FOLLOW-UP; JOB; OCCUPATIONS; PREVALENCE; DISORDERS	AM J PUBLIC HEALTH	AM. J. PUBLIC HEALTH	ENGLISH	AMER PUBLIC HEALTH ASSOC INC	2000	MAUSNER-DORSCH, H (CORRESPONDING AUTHOR), JOHNS HOPKINS UNIV, SCH PUBL HLTH, DEPT HLTH POLICY & MANAGEMENT, 624 N BROADWAY,7TH FL, BALTIMORE, MD 21205 USA.	0090-0036	AMERICAN JOURNAL OF PUBLIC HEALTH	229	PSYCHOSOCIAL WORK ENVIRONMENT AND DEPRESSION EPIDEMIOLOGIC ASSESSMENT OF THE DEMANDCONTROL MODEL	90	ISI	JOHNS HOPKINS UNIVERSITY; MARYLAND DEPARTMENT OF HEALTH AND MENTAL HYGIENE; JOHNS HOPKINS UNIVERSITY	JOHNS HOPKINS UNIV	MAUSNER-DORSCH H, 2000, AM J PUBLIC HEALTH	MAUSNER-DORSCH H, 2000, AM J PUBLIC HEALTH
GROVE L;BERKOWITZ S;CUDDEBACK G;PINK G;STEARNS S;DOMINO M	AUBRY T, 2020, LANCET PUBLIC HEALTH, V5, PE342, DOI 10.1016/S2468-2667(20)30055-4;BRISSON D, 2015, SOC WORK RES, V39, P119, DOI 10.1093/SWR/SVV009;COLLINS SE, 2013, AM J PUBLIC HEALTH, V103, PS269, DOI 10.2105/AJPH.2013.301312;COLLINS SE, 2012, AM J PUBLIC HEALTH, V102, P511, DOI 10.2105/AJPH.2011.300403;DESMOND M, 2012, AM J SOCIOL, V118, P88, DOI 10.1086/666082;GABRIELIAN S, 2017, PSYCHOL SERV,…	PEOPLE WITH DISABILITIES CAN FACE SUBSTANTIAL BARRIERS TO LIVING STABLY IN COMMUNITY SETTINGS. EVIDENCE SHOWS THAT PERMANENT SUPPORTIVE HOUSING (PSH), WHICH COMBINES SUBSIDIZED HOUSING WITH INDIVIDUALIZED SUPPORT SERVICES, CAN IMPROVE HOUSING STABILITY AMONG SUBPOPULATIONS OF PEOPLE WITH DISABILITIES, INCLUDING THOSE WITH BEHAVIORAL HEALTH CONDITIONS. PSH HAS ALSO BEEN SHOWN TO IMPROVE SOME HEALT…	UNIV NORTH CAROLINA CHAPEL HILL, GILLINGS SCH GLOBAL PUBL HLTH, DEPT HLTH POLICY & MANAGEMENT, CHAPEL HILL, NC USA.; UNIV NORTH CAROLINA CHAPEL HILL, SCH MED, DIV GEN MED & CLIN EPIDEMIOL, CHAPEL HILL, NC USA.; UNIV NORTH CAROLINA CHAPEL HILL, SCH SOCIAL WORK, CHAPEL HILL, NC USA.; UNC CH, CECIL G SHEPS CTR HLTH SERV RES, CHAPEL HILL, NC USA.; UNIV TEXAS AUSTIN, MED SCH, DEPT POPULAT HLTH, 1601 T…	HOUSING; DISABILITY; ADMINISTRATIVE DATA; SURVIVAL ANALYSIS	10.1089/pop.2021.0348	ARTICLE	CHRONICALLY HOMELESS INDIVIDUALS; 1ST; AREAS	POPUL HEALTH MANAG	POPUL. HEALTH MANAG.	ENGLISH	MARY ANN LIEBERT, INC	2022	GROVE, LR (CORRESPONDING AUTHOR), UNIV TEXAS AUSTIN, MED SCH, DEPT POPULAT HLTH, 1601 TRINITY ST BLDG STOP Z0500, AUSTIN, TX 78712 USA.	1942-7891	POPULATION HEALTH MANAGEMENT	2	PERMANENT SUPPORTIVE HOUSING TENURE AMONG A HETEROGENEOUS POPULATION OF ADULTS WITH DISABILITIES	25	ISI	UNIVERSITY OF NORTH CAROLINA SCHOOL OF MEDICINE; UNIVERSITY OF NORTH CAROLINA; UNIVERSITY OF NORTH CAROLINA CHAPEL HILL; UNIVERSITY OF NORTH CAROLINA SCHOOL OF MEDICINE; UNIVERSITY OF NORTH CAROLINA; UNIVERSITY OF NORTH CAROLINA CHAPEL HILL; UNIVERSITY OF NORTH CAROLINA; UNIVERSITY OF NORTH CAROLINA CHAPEL HILL; UNIVERSITY OF NORTH CAROLINA SCHOOL OF MEDICINE; UNIVERSITY OF NORTH CAROLINA; UNIVER…	UNIV TEXAS AUSTIN	GROVE LR, 2022, POPUL HEALTH MANAG	GROVE LR, 2022, POPUL HEALTH MANAG
ZHANG Y;GRINSPAN Z;KHULLAR D;UNRUH M;SHENKMAN E;COHEN A;KAUSHAL R	ALLEY DE, 2016, NEW ENGL J MED, V374, P8, DOI 10.1056/NEJMP1512532;ANONYMOUS, 2016, ADDRESSING SOCIAL DE;ANONYMOUS, NO TITLE CAPTURED;ANONYMOUS, NO TITLE CAPTURED;ANONYMOUS, 2018, CONDITION CATEGORIES;ASHANA DC, 2019, JAMA NETW OPEN, V2, DOI 10.1001/JAMANETWORKOPEN.2019.14471;BLUMENTHAL D, 2016, NEW ENGL J MED, V375, P909, DOI 10.1056/NEJMP1608511;BODENHEIMER T., 2013, STRATEGIES TO REDUCE COSTS …	BACKGROUND: IMPROVING CARE FOR HIGH-COST PATIENTS REQUIRES A BETTER UNDERSTANDING OF THEIR CHARACTERISTICS AND THE ABILITY TO EFFECTIVELY TARGET INTERVENTIONS. WE DEVELOPED AN ACTIONABLE TAXONOMY WITH CLINICALLY MEANINGFUL PATIENT CATEGORIES FOR HIGH-COST MEDICARE PATIENTS-THOSE IN THE TOP 10% OF TOTAL COSTS. METHODS: A CROSS-SECTIONAL STUDY OF A MEDICARE FEE-FOR-SERVICE (FFS) PATIENT COHORT IN T…	WEILL CORNELL MED COLL, DEPT HEALTHCARE POLICY & RES, NEW YORK, NY USA.; NEW YORK PRESBYTERIAN HOSP, NEW YORK, NY USA.; WEILL CORNELL MED COLL, DEPT PEDIAT, NEW YORK, NY USA.; WEILL CORNELL MED COLL, DEPT MED, NEW YORK, NY USA.; UNIV FLORIDA, DEPT HLTH OUTCOMES & BIOMED INFORMAT, GAINESVILLE, FL USA.;	CASE MANAGEMENT; HEALTH CARE DELIVERY; IMPLEMENTATION RESEARCH; QUALITY IMPROVEMENT; UTILIZATION	10.1016/j.hjdsi.2019.100406	ARTICLE	NEIGHBORHOOD SOCIOECONOMIC DISADVANTAGE; AREA DEPRIVATION; HIGH-NEED; HEALTH; CARE; MORTALITY; RISK	HEALTHCARE-J DEL SCI	HEALTHCARE	ENGLISH	ELSEVIER	2020	ZHANG, YK (CORRESPONDING AUTHOR), 402 E 67TH ST, NEW YORK, NY 10065 USA.	2213-0764	HEALTHCARE-THE JOURNAL OF DELIVERY SCIENCE AND INNOVATION	14	DEVELOPING AN ACTIONABLE PATIENT TAXONOMY TO UNDERSTAND AND CHARACTERIZE HIGHCOST MEDICARE PATIENTS	8	ISI	CORNELL UNIVERSITY; WEILL CORNELL MEDICINE; NEWYORK-PRESBYTERIAN HOSPITAL; CORNELL UNIVERSITY; WEILL CORNELL MEDICINE; CORNELL UNIVERSITY; WEILL CORNELL MEDICINE; STATE UNIVERSITY SYSTEM OF FLORIDA; UNIVERSITY OF FLORIDA	YK (CORRESPONDING AUTHOR)	ZHANG YK, 2020, HEALTHCARE-J DEL SCI	ZHANG YK, 2020, HEALTHCARE-J DEL SCI
BERGEN H;HAWTON K;WATERS K;NESS J;COOPER J;STEEG S;KAPUR N	BERGEN H, 2012, PSYCHOL MED, V42, P727, DOI 10.1017/S0033291711001747;BERGEN H, 2012, J AFFECT DISORDERS, V136, P526, DOI 10.1016/J.JAD.2011.10.036;BERGEN H, 2010, BRIT J PSYCHIAT, V197, P493, DOI 10.1192/BJP.BP.110.077651;BREAKWELL C, 2009, HLTH STAT Q, V33, P6;CARTER G, 2005, AUST NZ J PSYCHIAT, V39, P101, DOI 10.1111/J.1440-1614.2005.01515.X;DEPARTMENT OF HEALTH, MULT STUD SELF HARM;GUNNELL D,…	BACKGROUND PEOPLE WHO SELF-HARM HAVE AN INCREASED RISK OF PREMATURE DEATH. THE AIM OF THIS STUDY WAS TO INVESTIGATE CAUSE-SPECIFIC PREMATURE DEATH IN INDIVIDUALS WHO SELF-HARM, INCLUDING ASSOCIATIONS WITH SOCIOECONOMIC DEPRIVATION. METHODS WE UNDERTOOK A COHORT STUDY OF PATIENTS OF ALL AGES PRESENTING TO EMERGENCY DEPARTMENTS IN OXFORD, MANCHESTER, AND DERBY, UK, AFTER SELF-POISONING OR SELF-INJU…	UNIV OXFORD, WARNEFORD HOSP, DEPT PSYCHIAT, CTR SUICIDE RES, OXFORD OX3 7JX, ENGLAND.; DERBYSHIRE HEALTHCARE NHS FDN TRUST, MENTAL HLTH LIAISON TEAM, ROYAL DERBY HOSP, DERBY, ENGLAND.; UNIV MANCHESTER, CTR SUICIDE PREVENT, MANCHESTER, LANCS, ENGLAND.;		10.1016/S0140-6736(12)61141-6	ARTICLE	FOLLOW-UP; SUICIDE; MORTALITY; ENGLAND; TRENDS	LANCET	LANCET	ENGLISH	ELSEVIER SCIENCE INC	2012	HAWTON, K (CORRESPONDING AUTHOR), UNIV OXFORD, WARNEFORD HOSP, DEPT PSYCHIAT, CTR SUICIDE RES, OXFORD OX3 7JX, ENGLAND.	0140-6736	LANCET	207	PREMATURE DEATH AFTER SELFHARM A MULTICENTRE COHORT STUDY	380	ISI	UNIVERSITY OF OXFORD; UNIVERSITY OF NOTTINGHAM; UNIVERSITY OF MANCHESTER	UNIV OXFORD	BERGEN H, 2012, LANCET	BERGEN H, 2012, LANCET
WANG L;HONG P;JIANG W;REHMAN Y;HONG B;COUBAN R;WANG C;HAYES C;JUURLINK D;BUSSE J	ADEWUMI AD, 2018, CNS DRUGS, V32, P101, DOI 10.1007/S40263-018-0499-3;AGNOLI A, 2021, JAMA-J AM MED ASSOC, V326, P411, DOI 10.1001/JAMA.2021.11013;ANONYMOUS, 2019, PAIN RELIEF MEDICATION CONTAINING OPIOIDS, 2018;ANONYMOUS, 2020, CHRONIC PAIN IN AUSTRALIA;BAUMBLATT JAG, 2014, JAMA INTERN MED, V174, P796, DOI 10.1001/JAMAINTERNMED.2013.12711;BEDSON J, 2019, EUR J PAIN, V23, P908, DOI 10.1002/EJP.13…	BACKGROUND:HIGHER DOSES OF OPIOIDS, MENTAL HEALTH COMORBIDITIES, CO-PRESCRIPTION OF SEDATIVES, LOWER SOCIOECONOMIC STATUS AND A HISTORY OF OPIOID OVERDOSE HAVE BEEN REPORTED AS RISK FACTORS FOR OPIOID OVERDOSE; HOWEVER, THE MAGNITUDE OF THESE ASSOCIATIONS AND THEIR CREDIBILITY ARE UNCLEAR. WE SOUGHT TO IDENTIFY PREDICTORS OF FATAL AND NONFATAL OVERDOSE FROM PRESCRIPTION OPIOIDS.METHODS:WE SYSTEMA…	MCMASTER UNIV, DEPT ANESTHESIA, HAMILTON, ON, CANADA.; MCMASTER UNIV, MICHAEL G DEGROOTE INST PAIN RES & CARE, HAMILTON, ON, CANADA.; MCMASTER UNIV, DEPT HLTH RES METHODS EVIDENCE & IMPACT, HAMILTON, ON, CANADA.; UNIV TORONTO, DEPT ANESTHESIOL & PIN MED, TORONTO, ON, CANADA.; MCMASTER UNIV, FAC HLTH SCI, HAMILTON, ON, CANADA.; UNIV TORONTO, DEPT SURG, DIV PLAST SURG, TORONTO, ON, CANADA.; GUANGDO…		10.1503/cmaj.230459	REVIEW	INDUCED RESPIRATORY DEPRESSION; DRUG OVERDOSE; UNITED-STATES; RISK-FACTORS; PREVALENCE; MORTALITY; VETERANS; IMPACT; ASSOCIATION; GUIDELINE	CAN MED ASSOC J	CAN. MED. ASSOC. J.	ENGLISH	CMA-CANADIAN MEDICAL ASSOC	2023	WANG, L (CORRESPONDING AUTHOR), MCMASTER UNIV, DEPT ANESTHESIA, HAMILTON, ON, CANADA.; WANG, L (CORRESPONDING AUTHOR), MCMASTER UNIV, MICHAEL G DEGROOTE INST PAIN RES & CARE, HAMILTON, ON, CANADA.; WANG, L (CORRESPONDING AUTHOR), MCMASTER UNIV, DEPT HLTH RES METHODS EVIDENCE & IMPACT, HAMILTON, ON, CANADA.	0820-3946	CANADIAN MEDICAL ASSOCIATION JOURNAL	4	PREDICTORS OF FATAL AND NONFATAL OVERDOSE AFTER PRESCRIPTION OF OPIOIDS FOR CHRONIC PAIN A SYSTEMATIC REVIEW AND METAANALYSIS OF OBSERVATIONAL STUDIES	195	ISI	MCMASTER UNIVERSITY; MCMASTER UNIVERSITY; MCMASTER UNIVERSITY; UNIVERSITY OF TORONTO; MCMASTER UNIVERSITY; UNIVERSITY OF TORONTO; GUANGDONG ACADEMY OF SCIENCES; INSTITUTE OF INFORMATION, GUANGDONG ACADEMY OF SCIENCES; UNIVERSITY OF ARKANSAS SYSTEM; UNIVERSITY OF ARKANSAS MEDICAL SCIENCES; US DEPARTMENT OF VETERANS AFFAIRS; VETERANS HEALTH ADMINISTRATION (VHA); CENTRAL ARKANSAS VETERANS HEALTHCARE…	MCMASTER UNIV;MCMASTER UNIV;MCMASTER UNIV	WANG L, 2023, CAN MED ASSOC J	WANG L, 2023, CAN MED ASSOC J
SONG H;PARK J	ANONYMOUS, 2017, PHYSICAL ACTIVITY;ANTHONY JC, 1982, PSYCHOL MED, V12, P397, DOI 10.1017/S0033291700046730;BADEMLI K, 2019, PERSPECT PSYCHIATR C, V55, P401, DOI 10.1111/PPC.12324;BERK DR, 2006, J GERONTOL A-BIOL, V61, P97, DOI 10.1093/GERONA/61.1.97;CHOI H, 2019, ANAL REPORT KLOSA;CHOI M, 2019, HANGUK NONYONHAK, V39, P549, DOI 10.31888/JKGS.2019.39.3.549, DOI 10.31888/JKGS.2019.39.3.549;COUDERT J…	PURPOSE: THE RAPIDLY INCREASING OLDER ADULTS' POPULATION OF SOUTH KOREA HAS INCREASED THE SOCIOECONOMIC BURDEN ON SOCIETY DUE TO COGNITIVE DECLINE. IN THIS STUDY, WE EXAMINED THE ASSOCIATION BETWEEN CHANGES IN PHYSICAL ACTIVITY IN THE OLDER ADULTS AND THEIR COGNITIVE FUNCTION, A PRIMARY CRITERION FOR THE DIAGNOSIS OF DEMENTIA, USING PANEL DATA FROM THE 2012-2018 KOREAN LONGITUDINAL STUDY PATIENTS…	SANGJI UNIV, COLL HLTH SCI, DEPT HLTH POLICY & MANAGEMENT, WONJU, GANGWON DO, SOUTH KOREA.; DAEGU CATHOLIC UNIV, COLL NURSING, INST NURSING SCI, DAEGU, SOUTH KOREA.;	AGING; COGNITION DISORDERS; OLDER ADULTS; PHYSICAL ACTIVITY	10.2147/JMDH.S326612	ARTICLE	MINI-MENTAL STATE	J MULTIDISCIP HEALTH	J. MULTIDISCIP. HEALTHC.	ENGLISH	DOVE MEDICAL PRESS LTD	2022	PARK, JH (CORRESPONDING AUTHOR), DAEGU CATHOLIC UNIV, COLL NURSING, INST NURSING SCI, DAEGU, SOUTH KOREA.	1178-2390	JOURNAL OF MULTIDISCIPLINARY HEALTHCARE	8	EFFECTS OF CHANGES IN PHYSICAL ACTIVITY WITH COGNITIVE DECLINE IN KOREAN HOMEDWELLING OLDER ADULTS	15	ISI	SANGJI UNIVERSITY; CATHOLIC UNIVERSITY OF DAEGU	DAEGU CATHOLIC UNIV	SONG H, 2022, J MULTIDISCIP HEALTH	SONG H, 2022, J MULTIDISCIP HEALTH
MORGAN P;HU E	AMERICAN PSYCHIATRIC ASSOCIATION, 2022, DIAGNOSTIC AND STATISTICAL MANUAL OF MENTAL DISORSDERS, V5TH;BAUERMEISTER JJ, 2007, J CHILD PSYCHOL PSYC, V48, P831, DOI 10.1111/J.1469-7610.2007.01750.X;BAWEJA R, 2021, WORLD J PSYCHIATR, V11, P1206, DOI 10.5498/WJP.V11.I12.1206;BAX AC, 2019, J DEV BEHAV PEDIATR, V40, P81, DOI 10.1097/DBP.0000000000000626;BECK DM, 2011, J COGN DEV, V12, P169, DOI 10.1080/1…	WE EXAMINED WHETHER SOME GROUPS OF U.S. ELEMENTARY SCHOOLCHILDREN ARE LESS LIKELY TO BE DIAGNOSED AND TREATED FOR ADHD IN ANALYSES OF A POPULATION-BASED COHORT (N = 10,920). WE PREDICTED ADHD DIAGNOSIS USING MEASURES OF RACE AND ETHNICITY, AGE, SOCIOECONOMIC STATUS, BIRTHWEIGHT, INDIVIDUALLY ASSESSED ACADEMIC, BEHAVIORAL, AND EXECUTIVE FUNCTIONING, FAMILY LANGUAGE USE, MENTAL HEALTH, HEALTH INSUR…	PENN STATE UNIV, DEPT EDUC POLICY STUDIES, UNIVERSITY PK, PA USA.; PENN STATE UNIV, POPULAT RES INST, UNIVERSITY PK, PA USA.; SUNY ALBANY, SCH PUBL HLTH, DEPT HLTH POLICY MANAGEMENT & BEHAV, SUITE 170,ONE UNIV PL, RENSSELAER, NY 12144 USA.;	ATTENTION-DEFICIT/HYPERACTIVITY DISORDER; ELEMENTARY SCHOOL; LONGITUDINAL; RACIAL AND ETHNIC DISPARITIES; RACIAL/ETHNIC MINORITIES; LANGUAGE MINORITIES; ECLS-K: 2011	10.1016/j.psychres.2023.115393	ARTICLE	DEFICIT HYPERACTIVITY DISORDER; HEALTH-CARE UTILIZATION; RACIAL/ETHNIC DISPARITIES; ETHNIC DISPARITIES; EXECUTIVE FUNCTION; CHILDREN; PARENT; PREVALENCE; KINDERGARTEN; ADOLESCENTS	PSYCHIAT RES	PSYCHIATRY RES.	ENGLISH	ELSEVIER IRELAND LTD	2023	MORGAN, PL (CORRESPONDING AUTHOR), SUNY ALBANY, SCH PUBL HLTH, DEPT HLTH POLICY MANAGEMENT & BEHAV, SUITE 170,ONE UNIV PL, RENSSELAER, NY 12144 USA.	0165-1781	PSYCHIATRY RESEARCH	4	SOCIODEMOGRAPHIC DISPARITIES IN ADHD DIAGNOSIS AND TREATMENT AMONG US ELEMENTARY SCHOOLCHILDREN	327	ISI	PENNSYLVANIA COMMONWEALTH SYSTEM OF HIGHER EDUCATION (PCSHE); PENNSYLVANIA STATE UNIVERSITY; PENNSYLVANIA STATE UNIVERSITY -UNIVERSITY PARK; PENNSYLVANIA COMMONWEALTH SYSTEM OF HIGHER EDUCATION (PCSHE); PENNSYLVANIA STATE UNIVERSITY; PENNSYLVANIA STATE UNIVERSITY -UNIVERSITY PARK; STATE UNIVERSITY OF NEW YORK (SUNY) SYSTEM; UNIVERSITY AT ALBANY, SUNY	ONE UNIV PL	MORGAN PL, 2023, PSYCHIAT RES	MORGAN PL, 2023, PSYCHIAT RES
HASTEDT I;EISENHOWER A;SHELDRICK R;CARTER A	AMERICAN PSYCHIATRIC ASSOCIATION, 2013, DIAGNOSTIC STAT MANU, DOI 10.1176/APPI.BOOKS.9780890425596, DOI 10.1176/APPI.BOOKS.9780890425596;ANONYMOUS, 1995, MULLEN SCALES OF EARLY LEARNING;BANKSTON CL, 1997, SOC SCI QUART, V78, P508;BIALYSTOK E, 2010, BILING-LANG COGN, V13, P525, DOI 10.1017/S1366728909990423;BIALYSTOK E, 2009, COGNITION, V112, P494, DOI 10.1016/J.COGNITION.2009.06.014;BIALYSTOK E, …	PARENTS OF CHILDREN DIAGNOSED WITH AUTISM SPECTRUM DISORDERS (ASD) EXPRESS CONCERN ABOUT RAISING THEIR CHILDREN BILINGUALLY, AND OFTEN HEAR ADVICE FROM PROFESSIONALS AGAINST THE USE OF BILINGUALISM. THE CURRENT STUDY EXAMINED THE RELATION BETWEEN BILINGUALISM AND THE LANGUAGE AND SOCIAL COMMUNICATION SKILLS OF TODDLERS DIAGNOSED WITH ASD (N = 353) IN THE US, WHILE CONTROLLING FOR SOCIOECONOMIC RI…	UNIV MASSACHUSETTS, DEPT PSYCHOL, 100 MORRISSEY BLVD, BOSTON, MA 02125 USA.; BOSTON UNIV, SCH PUBL HLTH, DEPT HLTH LAW POLICY & MANAGEMENT, 715 ALBANY ST, BOSTON, MA 02118 USA.;	AUTISM SPECTRUM DISORDER; BILINGUALISM; LANGUAGE; SOCIAL COMMUNICATION	10.1007/s10803-022-05504-3	ARTICLE	YOUNG-CHILDREN; RESPONSIVENESS-SCALE; SOCIOECONOMIC-STATUS; SPECTRUM DISORDERS; ETHNIC-IDENTITY; MISSING DATA; VALIDITY; FAMILY; PERSPECTIVES; ADOLESCENTS	J AUTISM DEV DISORD	J. AUTISM DEV. DISORD.	ENGLISH	SPRINGER/PLENUM PUBLISHERS	2023	HASTEDT, I (CORRESPONDING AUTHOR), UNIV MASSACHUSETTS, DEPT PSYCHOL, 100 MORRISSEY BLVD, BOSTON, MA 02125 USA.	0162-3257	JOURNAL OF AUTISM AND DEVELOPMENTAL DISORDERS	3	BILINGUAL AND MONOLINGUAL AUTISTIC TODDLERS LANGUAGE AND SOCIAL COMMUNICATION SKILLS	53	ISI	UNIVERSITY OF MASSACHUSETTS SYSTEM; UNIVERSITY OF MASSACHUSETTS BOSTON; BOSTON UNIVERSITY	UNIV MASSACHUSETTS	HASTEDT I, 2023, J AUTISM DEV DISORD	HASTEDT I, 2023, J AUTISM DEV DISORD
ABRAMS L;MEHTA N	ALEXAPOULOS GS, 2005, LANCET, V365, P1961, DOI 10.1016/S0140-6736(05)66665-2;ANGEL J., 2016, HANDBOOK OF AGING AND THE SOCIAL SCIENCES, V8TH, P531;ANONYMOUS, 2017, STATA STATISTICAL SOFTWARE;ASSARI S, 2016, FRONT PUBLIC HEALTH, V4, DOI 10.3389/FPUBH.2016.00040;BARNES DM, 2017, SOC PSYCH PSYCH EPID, V52, P913, DOI 10.1007/S00127-017-1394-9;BEZRUCHKA S, 2012, ANNU REV PUBL HEALTH, V33, P157, DOI 10…	DESPITE CONCERNS ABOUT RECENT TRENDS IN THE HEALTH AND FUNCTIONING OF OLDER AMERICANS, LITTLE IS KNOWN ABOUT DYNAMICS OF DEPRESSION AMONG RECENT COHORTS OF U.S. OLDER ADULTS AND HOW THESE DYNAMICS DIFFER ACROSS SOCIODEMOGRAPHIC GROUPS. THIS STUDY EXAMINED SOCIODEMOGRAPHIC DIFFERENCES IN MID- AND LATE-LIFE DEPRESSIVE SYMPTOMS OVER AGE, AS WELL AS CHANGES OVER TIME. USING NATIONALLY REPRESENTATIVE …	UNIV MICHIGAN, DEPT HLTH MANAGEMENT & POLICY, SCH PUBL HLTH, 1415 WASHINGTON HTS, ANN ARBOR, MI 48109 USA.;		10.1016/j.ssmph.2019.100399	ARTICLE	SCALE CES-D; LIFE EXPECTANCY; PSYCHOLOGICAL DISTRESS; SOCIOECONOMIC-STATUS; MENTAL-DISORDERS; SELF-CARE; HEALTH; TRAJECTORIES; DISABILITY; TRENDS	SSM-POPUL HLTH	SSM-POPUL. HEALTH	ENGLISH	ELSEVIER SCI LTD	2019	ABRAMS, LR (CORRESPONDING AUTHOR), UNIV MICHIGAN, DEPT HLTH MANAGEMENT & POLICY, SCH PUBL HLTH, 1415 WASHINGTON HTS, ANN ARBOR, MI 48109 USA.	2352-8273	SSM-POPULATION HEALTH	68	CHANGES IN DEPRESSIVE SYMPTOMS OVER AGE AMONG OLDER AMERICANS DIFFERENCES BY GENDER RACEETHNICITY EDUCATION AND BIRTH COHORT	7	ISI	UNIVERSITY OF MICHIGAN SYSTEM; UNIVERSITY OF MICHIGAN	UNIV MICHIGAN	ABRAMS LR, 2019, SSM-POPUL HLTH	ABRAMS LR, 2019, SSM-POPUL HLTH
BRODER-FINGERT S;WALLS M;AUGUSTYN M;BEIDAS R;MANDELL D;WILTSEY-STIRMAN S;SILVERSTEIN M;FEINBERG E	ANONYMOUS, 2014, AHRQ PUBLICATION;ANONYMOUS, EVALUATING STRESS BO;ANONYMOUS, 2003, UNEQUAL TREATMENT: CONFRONTING RACIAL AND ETHNIC DISPARITIES IN HEALTH CARE, DOI DOI 10.17226/12875;AUSTIN B, 2000, EPILEPSY BEHAV, V1, PS15, DOI 10.1006/EBEH.2000.0105;BENEVIDES TW, 2016, PEDIATRICS, V137, PS176, DOI 10.1542/PEDS.2015-2851P;BLACK HL, 2010, J ASTHMA, V47, P913, DOI 10.3109/02770903.2010.506681;BROD…	BACKGROUND: SIGNIFICANT RACIAL, ETHNIC, AND SOCIOECONOMIC DISPARITIES EXIST IN ACCESS TO EVIDENCE-BASED TREATMENT SERVICES FOR CHILDREN WITH AUTISM SPECTRUM DISORDER (ASD). PATIENT NAVIGATION (PN) IS A THEORY-BASED CARE MANAGEMENT STRATEGY DESIGNED TO REDUCE DISPARITIES IN ACCESS TO CARE. THE PURPOSE OF THIS STUDY IS TO TEST THE EFFECTIVENESS OF PN A STRATEGY TO REDUCE DISPARITIES IN ACCESS TO EV…	BOSTON UNIV, SCH MED, DEPT PEDIAT, BOSTON, MA 02114 USA.; BOSTON UNIV, SCH MED, DIV DEV & BEHAV PEDIAT, BOSTON, MA 02114 USA.; UNIV PENN, PERELMAN SCH MED, CTR MENTAL HLTH POLICY & SERV RES, PHILADELPHIA, PA 19104 USA.; NATL CTR PTSD, DISSEMINAT & TRAINING DIV, MENLO PK, CA 94025 USA.; BOSTON UNIV, SCH PUBL HLTH, DEPT COMMUNITY HLTH SCI, BOSTON, MA 02114 USA.; BOSTON UNIV, SCH MED, DIV GEN PEDIAT…	AUTISM SPECTRUM DISORDER; NAVIGATION; DISPARITIES	10.1186/s12888-018-1661-7	ARTICLE	EARLY INTERVENTION; DIAGNOSIS; CARE; DISPARITIES; BARRIERS; OUTCOMES; IDENTIFICATION; SATISFACTION; PROGRAMS; ELEMENTS	BMC PSYCHIATRY	BMC PSYCHIATRY	ENGLISH	BMC	2018	BRODER-FINGERT, S (CORRESPONDING AUTHOR), BOSTON UNIV, SCH MED, DEPT PEDIAT, BOSTON, MA 02114 USA.; BRODER-FINGERT, S (CORRESPONDING AUTHOR), BOSTON UNIV, SCH MED, DIV GEN PEDIAT, 850 HARRISON AVE,ROOM 310A, BOSTON, MA 02118 USA.		BMC PSYCHIATRY	19	A HYBRID TYPE I RANDOMIZED EFFECTIVENESSIMPLEMENTATION TRIAL OF PATIENT NAVIGATION TO IMPROVE ACCESS TO SERVICES FOR CHILDREN WITH AUTISM SPECTRUM DISORDER	18	ISI	BOSTON UNIVERSITY; BOSTON UNIVERSITY; UNIVERSITY OF PENNSYLVANIA; BOSTON UNIVERSITY; BOSTON UNIVERSITY	BOSTON UNIV;BOSTON UNIV	BRODER-FINGERT S, 2018, BMC PSYCHIATRY	BRODER-FINGERT S, 2018, BMC PSYCHIATRY
ANTONIOU T;MCCORMACK D;KITCHEN S;PAJER K;GARDNER W;LUNSKY Y;PENNER M;TADROUS M;MAMDANI M;JUURLINK D;GOMES T	ANONYMOUS, J HOPK ACG SYST;ANONYMOUS, 2017, FOCUS ON GEOGRAPHY SERIES, 2016 CENSUS.;APPLEBY J, VARIATIONS HLTH CARE;ARORA N, 2016, CAN J PSYCHIAT, V61, P758, DOI 10.1177/0706743716649190;BARBARESI WJ, 2020, J DEV BEHAV PEDIATR, V41, PS35, DOI 10.1097/DBP.0000000000000770;BARCZYK ZA, 2020, J CHILD ADOL PSYCHOP, V30, P87, DOI 10.1089/CAP.2019.0032;BUSHNELL GA, 2021, J AM ACAD CHILD PSY, V60, P877, …	BACKGROUND POPULATION-BASED RESEARCH EXAMINING GEOGRAPHIC VARIABILITY IN PSYCHOTROPIC MEDICATION DISPENSING TO CHILDREN AND YOUTH AND THE SOCIODEMOGRAPHIC CORRELATES OF SUCH VARIATION IS LACKING. VARIATION IN PSYCHOTROPIC USE COULD REFLECT DISPARITIES IN ACCESS TO NON-PHARMACOLOGIC INTERVENTIONS AND IDENTIFY POTENTIALLY CONCERNING USE PATTERNS.METHODS WE CONDUCTED A POPULATION-BASED STUDY OF ALL …	ST MICHAELS HOSP, LI KA SHING KNOWLEDGE INST, TORONTO, ON, CANADA.; ICES, TORONTO, ON, CANADA.; UNIV TORONTO, DEPT FAMILY & COMMUNITY MED, TORONTO, ON, CANADA.; ST MICHAELS HOSP, DEPT FAMILY & COMMUNITY MED, TORONTO, ON, CANADA.; CHILDRENS HOSP EASTERN ONTARIO RES INST, OTTAWA, ON, CANADA.; UNIV OTTAWA, DEPT PSYCHIAT, OTTAWA, ON, CANADA.; UNIV OTTAWA, SCH EPIDEMIOL & PUBL HLTH, OTTAWA, ON, CANADA…	CHILD; ADOLESCENT; PSYCHOTROPIC DRUGS; PRESCRIPTIONS; STATISTICS & NUMERICAL DATA; GEOGRAPHIC VARIATION; SMALL-AREA ANALYSIS; SOCIOECONOMIC FACTORS	10.1186/s12889-022-14677-6	ARTICLE	CLINICAL-PRACTICE GUIDELINE; MEDICATION USE; ANTIDEPRESSANT PRESCRIPTIONS; NATIONAL SAMPLE; YOUNG-PEOPLE; ADOLESCENTS; PATTERNS; TRENDS; PREVALENCE; DISORDER	BMC PUBLIC HEALTH	BMC PUBLIC HEALTH	ENGLISH	BMC	2023	ANTONIOU, T (CORRESPONDING AUTHOR), ST MICHAELS HOSP, LI KA SHING KNOWLEDGE INST, TORONTO, ON, CANADA.; ANTONIOU, T (CORRESPONDING AUTHOR), ICES, TORONTO, ON, CANADA.; ANTONIOU, T (CORRESPONDING AUTHOR), UNIV TORONTO, DEPT FAMILY & COMMUNITY MED, TORONTO, ON, CANADA.; ANTONIOU, T (CORRESPONDING AUTHOR), ST MICHAELS HOSP, DEPT FAMILY & COMMUNITY MED, TORONTO, ON, CANADA.		BMC PUBLIC HEALTH	3	GEOGRAPHIC VARIATION AND SOCIODEMOGRAPHIC CORRELATES OF PRESCRIPTION PSYCHOTROPIC DRUG USE AMONG CHILDREN AND YOUTH IN ONTARIO CANADA A POPULATIONBASED STUDY	23	ISI	UNIVERSITY OF TORONTO; SAINT MICHAELS HOSPITAL TORONTO; LI KA SHING KNOWLEDGE INSTITUTE; UNIVERSITY OF TORONTO; UNIVERSITY OF TORONTO; UNIVERSITY OF TORONTO; SAINT MICHAELS HOSPITAL TORONTO; UNIVERSITY OF OTTAWA; CHILDREN'S HOSPITAL OF EASTERN ONTARIO; UNIVERSITY OF OTTAWA; UNIVERSITY OF OTTAWA; UNIVERSITY OF TORONTO; CENTRE FOR ADDICTION AND MENTAL HEALTH - CANADA; UNIVERSITY OF TORONTO; UNIVERS…	LI KA SHING KNOWLEDGE INST;T (CORRESPONDING AUTHOR);UNIV TORONTO;ST MICHAELS HOSP	ANTONIOU T, 2023, BMC PUBLIC HEALTH	ANTONIOU T, 2023, BMC PUBLIC HEALTH
WOOTTON O;KING A;MOY K;STEIN D;SUSSER E	ALIBER M, 2003, WORLD DEV, V31, P473, DOI 10.1016/S0305-750X(02)00219-X;ANIC A, 2020, SAJP-S AFR J PSYCHI, V26, DOI 10.4102/SAJPSYCHIATRY.V26I0.1526;ANONYMOUS, 2004, PERSONALITY ASSESSMENT;ANONYMOUS, 2023, S AFR UN RAT 1991 20;CAMPBELL MM, 2017, PLOS ONE, V12, DOI 10.1371/JOURNAL.PONE.0188466;CARD D., 1999, HDB LABOR EC, V3, P1801, DOI 10.1016/S1573-4463(99)03011-4;CHARLSON FJ, 2018, SCHIZOPHRENI…	LITTLE IS KNOWN ABOUT THE ECONOMIC IMPACT OF DISABILITY GRANTS FOR PEOPLE LIVING WITH SCHIZOPHRENIA IN LOW- AND MIDDLE- INCOME COUNTRIES. IN THIS BRIEF REPORT, WE SHOW THAT RECEIPT OF DISABILITY BENEFITS IS SIGNIFICANTLY ASSOCIATED (BETA = 0.105, P < 0.0001) WITH INCREASED HOUSEHOLD AND PERSONAL WEALTH IN LARGE SAMPLE OF PEOPLE LIVING WITH SCHIZOPHRENIA IN SOUTH AFRICA (N = 1154). THIS STUDY PROV…	UNIV CAPE TOWN, DEPT PSYCHIAT & NEUROSCI INST, CAPE TOWN, SOUTH AFRICA.; CITY UNIV NEW YORK, GRAD SCH PUBL HLTH & HLTH POLICY, NEW YORK, NY USA.; NYU, DEPT GLOBAL PUBL HLTH, NEW YORK, NY USA.; SAMRC UNIT RISK & RESILIENCE MENTAL DISORDERS, CAPE TOWN, SOUTH AFRICA.; COLUMBIA UNIV, MAILMAN SCH PUBL HLTH, DEPT EPIDEMIOL, NEW YORK, NY USA.; NEW YORK STATE PSYCHIAT INST & HOSP, NEW YORK, NY USA.;	SCHIZOPHRENIA; SOUTH AFRICA; SOCIAL SECURITY DISABILITY; SOCIOECONOMIC STATUS (SES)	10.1007/s00127-023-02577-y	ARTICLE	MENTAL-ILLNESS; EMPLOYMENT; PEOPLE; OUTCOMES; POVERTY; HEALTH	SOC PSYCH PSYCH EPID	SOC. PSYCHIATRY PSYCHIATR. EPIDEMIOL.	ENGLISH	SPRINGER HEIDELBERG	2024	WOOTTON, O (CORRESPONDING AUTHOR), UNIV CAPE TOWN, DEPT PSYCHIAT & NEUROSCI INST, CAPE TOWN, SOUTH AFRICA.	0933-7954	SOCIAL PSYCHIATRY AND PSYCHIATRIC EPIDEMIOLOGY	0	DISABILITY BENEFITS PROTECT AGAINST LOST INCOME FOR SOUTH AFRICANS LIVING WITH SCHIZOPHRENIA	59	ISI	UNIVERSITY OF CAPE TOWN; CITY UNIVERSITY OF NEW YORK (CUNY) SYSTEM; NEW YORK UNIVERSITY; COLUMBIA UNIVERSITY; NEW YORK STATE PSYCHIATRY INSTITUTE	UNIV CAPE TOWN	WOOTTON O, 2024, SOC PSYCH PSYCH EPID	WOOTTON O, 2024, SOC PSYCH PSYCH EPID
DUNCAN D;HICKSON D;GOEDEL W;CALLANDER D;BROOKS B;CHEN Y;HANSON H;EAVOU R;KHANNA A;CHAIX B;REGAN S;WHEELER D;MAYER K;SAFREN S;MELVIN S;DRAPER C;MAGEE-JACKSON V;BREWER R;SCHNEIDER J	ADEYEMI OM, 2013, CLIN INFECT DIS, V56, P1512, DOI 10.1093/CID/CIT063;ALTMAN M., 2004, NUMERICAL ISSUES STA;ANNA, 2017, P C RETR OPP INF SEA;ANONYMOUS, 2016, HIV SURVEILLANCE REPORT, V28;ANONYMOUS, 2008, ENCYCLOPEDIA OF SURVEY RESEARCH METHODS;ANSELIN L, 1998, STAT TEXTB MONOG, V155, P237;ANSELIN L., 2013, SPATIAL ECONOMETRICS;BARAL S, 2013, BMC PUBLIC HEALTH, V13, DOI 10.1186/1471-2458-13-482;BA…	BACKGROUND: IN MANY PARTS OF THE WORLD, STARK RACIAL DISPARITIES IN HUMAN IMMUNODEFICIENCY VIRUS (HIV) PREVALENCE, INCIDENCE, PREVENTION, AND CARE OUTCOMES PERSIST AMONG GAY, BISEXUAL, AND OTHER MEN WHO HAVE SEX WITH MEN (MSM), WITH BLACK MSM SIGNIFICANTLY IMPACTED IN THE UNITED STATES (U.S.). INDIVIDUAL-LEVEL CHARACTERISTICS, INCLUDING SEXUAL BEHAVIORS AND SOCIOECONOMIC STATUS, DO NOT FULLY ACCO…	NYU, SCH MED, DEPT POPULAT HLTH, SPATIAL EPIDEMIOL LAB, NEW YORK, NY 10016 USA.; MY BROS KEEPER INC, CTR RES EVALUAT & ENVIRONM & POLICY CHANGE, JACKSON, MS 39202 USA.; PEOPLE LIVING INC, US HELPING US, WASHINGTON, DC 20010 USA.; UNIV CHICAGO, CHICAGO CTR HIV ELIMINAT, CHICAGO, IL 60637 USA.; UNIV CHICAGO, DEPT MED, 5841 S MARYLAND AVE, CHICAGO, IL 60637 USA.; UNIV CHICAGO, SURVEY LAB, CHICAGO, I…	HIV PREVENTION; HIV CARE; GEOGRAPHY; NEIGHBORHOODS; NETWORKS; GAY MEN'S HEALTH; MEN WHO HAVE SEX WITH MEN (MSM); MINORITY; BLACK; AFRICAN AMERICAN	10.3390/ijerph16111922	ARTICLE	POPULATION-BASED SAMPLE; NEW-YORK-CITY; YOUNG MEN; PREEXPOSURE PROPHYLAXIS; RISK BEHAVIOR; RACIAL DISPARITIES; VIRAL SUPPRESSION; WHITE MEN; INFECTION; HEALTH	INT J ENV RES PUB HE	INT. J. ENVIRON. RES. PUBLIC HEALTH	ENGLISH	MDPI	2019	DUNCAN, DT (CORRESPONDING AUTHOR), NYU, SCH MED, DEPT POPULAT HLTH, SPATIAL EPIDEMIOL LAB, NEW YORK, NY 10016 USA.		INTERNATIONAL JOURNAL OF ENVIRONMENTAL RESEARCH AND PUBLIC HEALTH	46	THE SOCIAL CONTEXT OF HIV PREVENTION AND CARE AMONG BLACK MEN WHO HAVE SEX WITH MEN IN THREE US CITIES THE NEIGHBORHOODS AND NETWORKS N2 COHORT STUDY	16	ISI	NEW YORK UNIVERSITY; UNIVERSITY OF CHICAGO; UNIVERSITY OF CHICAGO; UNIVERSITY OF CHICAGO; SORBONNE UNIVERSITE; INSTITUT NATIONAL DE LA SANTE ET DE LA RECHERCHE MEDICALE (INSERM); IONA COLLEGE; FENWAY HEALTH; HARVARD UNIVERSITY; BETH ISRAEL DEACONESS MEDICAL CENTER; HARVARD MEDICAL SCHOOL; UNIVERSITY OF MIAMI; UNIVERSITY OF CHICAGO	SCH MED	DUNCAN DT, 2019, INT J ENV RES PUB HE	DUNCAN DT, 2019, INT J ENV RES PUB HE
RICE W;LOGIE C;NAPOLES T;WALCOTT M;BATCHELDER A;KEMPF M;WINGOOD G;KONKLE-PARKER D;TURAN B;WILSON T;JOHNSON M;WEISER S;TURAN J	ANONYMOUS, 1999, KILLING THE BLACK BODY: RACE, REPRODUCTION AND THE MEANING OF LIBERTY;ANONYMOUS, 2016, WEB APPL MAN AN PRES;AUERBACH JD, 2011, GLOB PUBLIC HEALTH, V6, PS293, DOI 10.1080/17441692.2011.594451;BACON MC, 2005, CLIN DIAGN LAB IMMUN, V12, P1013, DOI 10.1128/CDLI.12.9.1013-1019.2005;BARKAN SE, 1998, EPIDEMIOLOGY, V9, P117, DOI 10.1097/00001648-199803000-00004;BATEY DS, 2016, AIDS PATIE…	ATTITUDES AND BEHAVIOR THAT DEVALUE INDIVIDUALS BASED UPON THEIR HIV STATUS (HIV-RELATED STIGMA) ARE BARRIERS TO HIV PREVENTION, TREATMENT, AND WELLBEING AMONG WOMEN LIVING WITH HIV. OTHER COEXISTING FORMS OF STIGMA (E.G., RACISM, SEXISM) MAY WORSEN THE EFFECTS OF HIV-RELATED STIGMA, AND MAY CONTRIBUTE TO PERSISTENT RACIAL AND GENDERED DISPARITIES IN HIV PREVENTION AND TREATMENT. FEW STUDIES EXAM…	UNIV ALABAMA BIRMINGHAM, DEPT PSYCHOL, 1300 UNIV BLVD, BIRMINGHAM, AL 35294 USA.; UNIV TORONTO, FACTOR INWENTASH FAC SOCIAL WORK, 246 BLOOR ST, TORONTO, ON, CANADA.; UNIV CALIF SAN FRANCISCO, DEPT MED, DIV HIV ID & GLOBAL MED, SAN FRANCISCO, CA USA.; SAGE COLL, SCH HLTH SCI, ALBANY, NY USA.; MASSACHUSETTS GEN HOSP, BOSTON, MA 02114 USA.; HARVARD MED SCH, BOSTON, MA USA.; UNIV ALABAMA BIRMINGHAM, …	STIGMA; DISCRIMINATION; INTERSECTIONALITY; HIV; WOMEN; UNITED STATES; QUALITATIVE RESEARCH; HEALTH DISPARITIES	10.1016/j.socscimed.2018.05.001	ARTICLE	ACTIVE ANTIRETROVIRAL THERAPY; POSITIVE AFRICAN; DATA SATURATION; SUBSTANCE USE; BLACK-WOMEN; SAMPLE-SIZE; HEALTH; HIV/AIDS; GENDER; DISCRIMINATION	SOC SCI MED	SOC. SCI. MED.	ENGLISH	PERGAMON-ELSEVIER SCIENCE LTD	2018	RICE, WS (CORRESPONDING AUTHOR), UNIV ALABAMA BIRMINGHAM, DEPT PSYCHOL, 1300 UNIV BLVD, BIRMINGHAM, AL 35294 USA.	0277-9536	SOCIAL SCIENCE & MEDICINE	118	PERCEPTIONS OF INTERSECTIONAL STIGMA AMONG DIVERSE WOMEN LIVING WITH HIV IN THE UNITED STATES	208	ISI	UNIVERSITY OF ALABAMA SYSTEM; UNIVERSITY OF ALABAMA BIRMINGHAM; UNIVERSITY OF TORONTO; UNIVERSITY OF CALIFORNIA SYSTEM; UNIVERSITY OF CALIFORNIA SAN FRANCISCO; RUSSELL SAGE COLLEGE; HARVARD UNIVERSITY; MASSACHUSETTS GENERAL HOSPITAL; HARVARD UNIVERSITY; HARVARD MEDICAL SCHOOL; UNIVERSITY OF ALABAMA SYSTEM; UNIVERSITY OF ALABAMA BIRMINGHAM; COLUMBIA UNIVERSITY; UNIVERSITY OF MISSISSIPPI MEDICAL CE…	UNIV ALABAMA BIRMINGHAM	RICE WS, 2018, SOC SCI MED	RICE WS, 2018, SOC SCI MED
EKANAYAKE S;AHMAD F;MCKENZIE K	AHMAD F, 2004, WOMEN HEALTH, V40, P113, DOI 10.1300/J013V40N04_07;AHMAD F, 2009, SOC SCI MED, V69, P613, DOI 10.1016/J.SOCSCIMED.2009.06.011;ANONYMOUS, NVIVO QUAL DAT AN SO;BEISER M, 2003, INT MIGR, V41, P233, DOI 10.1111/J.0020-7985.2003.00268.X;BHANA K, 1986, J CROSS CULT PSYCHOL, V17, P493, DOI 10.1177/0022002186017004007;BHUGRA D, 2004, BRIT J PSYCHIAT, V184, P10, DOI 10.1192/BJP.184.1.10;BHU…	OBJECTIVE: TO EXPLORE HOW SOUTH ASIAN ORIGIN WOMEN IN TORONTO, CANADA, UNDERSTAND AND EXPLAIN THE CAUSES OF THEIR DEPRESSION. DESIGN: CROSS-SECTIONAL IN-DEPTH QUALITATIVE INTERVIEWS. SETTING: OUTPATIENT SERVICE IN TORONTO, ONTARIO. PARTICIPANTS: TEN WOMEN WITH SYMPTOMS OF DEPRESSION AGED BETWEEN 22 AND 65 YEARS OF AGE. SEVEN WERE FROM INDIA, TWO FROM SRI LANKA AND ONE FROM PAKISTAN. FOUR WERE MUS…	CAMH, HLTH SYST & HLTH EQU RES GRP, SOCIAL AETIOL MENTAL ILLNESS SAMI TRAINING PROGRA, TORONTO, ON, CANADA.; YORK UNIV, FAC HLTH, SCH HLTH POLICY & MANAGEMENT, TORONTO, ON M3J 2R7, CANADA.; UNIV TORONTO, DEPT PSYCHIAT, TORONTO, ON, CANADA.;		10.1136/bmjopen-2011-000641	ARTICLE	COMMON MENTAL-DISORDERS; PRIMARY-CARE PATIENTS; EXPLANATORY MODELS; PSYCHOLOGICAL DISTRESS; CONCEPTUAL MODELS; ILLNESS; IMMIGRANTS; SERVICES; BEHAVIOR; SEEKING	BMJ OPEN	BMJ OPEN	ENGLISH	BMJ PUBLISHING GROUP	2012	MCKENZIE, K (CORRESPONDING AUTHOR), CAMH, HLTH SYST & HLTH EQU RES GRP, SOCIAL AETIOL MENTAL ILLNESS SAMI TRAINING PROGRA, TORONTO, ON, CANADA.	2044-6055	BMJ OPEN	28	QUALITATIVE CROSSSECTIONAL STUDY OF THE PERCEIVED CAUSES OF DEPRESSION IN SOUTH ASIAN ORIGIN WOMEN IN TORONTO	2	ISI	UNIVERSITY OF TORONTO; CENTRE FOR ADDICTION AND MENTAL HEALTH - CANADA; YORK UNIVERSITY - CANADA; UNIVERSITY OF TORONTO	K (CORRESPONDING AUTHOR)	EKANAYAKE S, 2012, BMJ OPEN	EKANAYAKE S, 2012, BMJ OPEN
ELLERBE L;MANFREDI L;GUPTA S;PHELPS T;BOWE T;RUBINSKY A;BURDEN J;HARRIS A	ANONYMOUS, 2010, VHA HDB 1330 01 HLTH;ANONYMOUS, 2008, VHA HDB;HARRIS AHS, 2015, J SUBST ABUSE TREAT, V53, P16, DOI 10.1016/J.JSAT.2015.01.002;HARRIS AHS, 2011, BMC HEALTH SERV RES, V11, DOI 10.1186/1472-6963-11-73;MILES M., 2014, QUALITATIVE DATA ANALYSIS: A METHODS SOURCEBOOK;REIF S, 2014, PSYCHIAT SERV, V65, P301, DOI 10.1176/APPI.PS.201300242;TRAFTON JA, 2013, MED CARE, V51, PS29, DOI 10.1097…	BACKGROUND: IN THE U.S. DEPARTMENT OF VETERANS AFFAIRS (VA), RESIDENTIAL TREATMENT PROGRAMS ARE AN IMPORTANT PART OF THE CONTINUUM OF CARE FOR PATIENTS WITH A SUBSTANCE USE DISORDER (SUD). HOWEVER, A LIMITED NUMBER OF PROGRAM-SPECIFIC MEASURES TO IDENTIFY QUALITY GAPS IN SUD RESIDENTIAL PROGRAMS EXIST. THIS STUDY AIMED TO: (1) DEVELOP METRICS FOR TWO PRE-ADMISSION PROCESSES: WAIT TIME AND ENGAGEM…	DEPT VET AFFAIRS VA PALO ALTO HLTH CARE SYST, CTR INNOVAT IMPLEMENTAT, 795 WILLOW RD MPD 152, MENLO PK, CA 94025 USA.; UNIV CALIF SAN FRANCISCO, DEPT MED, SAN FRANCISCO, CA USA.; SAN FRANCISCO VA MED CTR, SAN FRANCISCO, CA USA.; SALEM VA MED CTR, SALEM, VA USA.;	SUBSTANCE USE DISORDERS; RESIDENTIAL TREATMENT; STANDARDS OF CARE; QUALITY MEASUREMENT; QUALITY IMPROVEMENT	10.1186/s13722-017-0075-z	ARTICLE	QUALITY MEASURES	ADDICT SCI CLIN PRAC	ADDICT. SCI. CLIN. PRACT.	ENGLISH	BMC	2017	MANFREDI, L (CORRESPONDING AUTHOR), DEPT VET AFFAIRS VA PALO ALTO HLTH CARE SYST, CTR INNOVAT IMPLEMENTAT, 795 WILLOW RD MPD 152, MENLO PK, CA 94025 USA.	1940-0640	ADDICTION SCIENCE & CLINICAL PRACTICE	4	VA RESIDENTIAL SUBSTANCE USE DISORDER TREATMENT PROGRAM PROVIDERS PERCEPTIONS OF FACILITATORS AND BARRIERS TO PERFORMANCE ON PREADMISSION PROCESSES	12	ISI	US DEPARTMENT OF VETERANS AFFAIRS; VETERANS HEALTH ADMINISTRATION (VHA); VA PALO ALTO HEALTH CARE SYSTEM; UNIVERSITY OF CALIFORNIA SYSTEM; UNIVERSITY OF CALIFORNIA SAN FRANCISCO; US DEPARTMENT OF VETERANS AFFAIRS; VETERANS HEALTH ADMINISTRATION (VHA); SAN FRANCISCO VA MEDICAL CENTER; US DEPARTMENT OF VETERANS AFFAIRS; VETERANS HEALTH ADMINISTRATION (VHA); SALEM VETERANS AFFAIRS MEDICAL CENTER	CTR INNOVAT IMPLEMENTAT	ELLERBE LS, 2017, ADDICT SCI CLIN PRAC	ELLERBE LS, 2017, ADDICT SCI CLIN PRAC
DO D;ROUX A;HAJAT A;AUCHINCLOSS A;MERKIN S;RANJIT N;SHEA S;SEEMAN T	ADAM EK, 2006, P NATL ACAD SCI USA, V103, P17058, DOI 10.1073/PNAS.0605053103;ADAM EK, 2009, PSYCHONEUROENDOCRINO, V34, P1423, DOI 10.1016/J.PSYNEUEN.2009.06.011;ANESHENSEL CS, 1996, J HEALTH SOC BEHAV, V37, P293, DOI 10.2307/2137258;ANONYMOUS, HLTH PSYCHOL REV;BJÂ™RNTORP P, 2000, NUTRITION, V16, P924, DOI 10.1016/S0899-9007(00)00422-6;BOARDMAN JD, 2001, J HEALTH SOC BEHAV, V42, P151, DOI 10.2307…	ALTHOUGH STRESS IS OFTEN HYPOTHESIZED TO CONTRIBUTE TO THE EFFECTS OF NEIGHBORHOODS ON HEALTH, VERY FEW STUDIES HAVE INVESTIGATED ASSOCIATIONS OF NEIGHBORHOOD CHARACTERISTICS WITH STRESS BIOMARKERS. THIS STUDY HELPS ADDRESS THE GAP IN THE LITERATURE BY EXAMINING WHETHER NEIGHBORHOOD CHARACTERISTICS ARE ASSOCIATED WITH CORTISOL PROFILES. ANALYSES WERE BASED ON DATA FROM THE MULTI-ETHNIC STUDY OF A…	UNIV S CAROLINA, DEPT HLTH SERV POLICY & MANAGEMENT, ARNOLD SCH PUBL HLTH, COLUMBIA, SC 29208 USA.; UNIV MICHIGAN, SCH PUBL HLTH, CTR SOCIAL EPIDEMIOL & POPULAT HLTH, ANN ARBOR, MI 48109 USA.; DREXEL UNIV, SCH PUBL HLTH, DEPT EPIDEMIOL & BIOSTAT, PHILADELPHIA, PA USA.; UNIV CALIF LOS ANGELES, UCLA SCH MED, DIV GERIATR, LOS ANGELES, CA 90024 USA.; UNIV TEXAS AUSTIN, DIV HLTH PROMOT & BEHAV SCI, SC…	NEIGHBORHOOD CONTEXT; CORTISOL; BIOMARKER; HIERARCHICAL LINEAR MODELING	10.1016/j.healthplace.2010.12.019	ARTICLE	SOCIOECONOMIC-STATUS; SALIVARY CORTISOL; AFRICAN-AMERICAN; MENTAL-HEALTH; STRESS; DISADVANTAGE; RESPONSES; DISORDER; CONTEXT; ASSOCIATIONS	HEALTH PLACE	HEALTH PLACE	ENGLISH	ELSEVIER SCI LTD	2011	DO, DP (CORRESPONDING AUTHOR), UNIV S CAROLINA, DEPT HLTH SERV POLICY & MANAGEMENT, ARNOLD SCH PUBL HLTH, 800 SUMTER ST,HESC ROOM 116E, COLUMBIA, SC 29208 USA.	1353-8292	HEALTH & PLACE	70	CIRCADIAN RHYTHM OF CORTISOL AND NEIGHBORHOOD CHARACTERISTICS IN A POPULATIONBASED SAMPLE THE MULTIETHNIC STUDY OF ATHEROSCLEROSIS	17	ISI	UNIVERSITY OF SOUTH CAROLINA SYSTEM; UNIVERSITY OF SOUTH CAROLINA COLUMBIA; UNIVERSITY OF MICHIGAN SYSTEM; UNIVERSITY OF MICHIGAN; DREXEL UNIVERSITY; UNIVERSITY OF CALIFORNIA SYSTEM; UNIVERSITY OF CALIFORNIA LOS ANGELES; UNIVERSITY OF CALIFORNIA LOS ANGELES MEDICAL CENTER; DAVID GEFFEN SCHOOL OF MEDICINE AT UCLA; UNIVERSITY OF TEXAS SYSTEM; UNIVERSITY OF TEXAS AUSTIN; COLUMBIA UNIVERSITY; COLUMBI…	UNIV S CAROLINA	DO DP, 2011, HEALTH PLACE	DO DP, 2011, HEALTH PLACE
MEYER C;ARMENIAN H;EATON W;FORD D	*AM HEART ASS, 1988, GUID MEAS BLOOD PRES, PA209;ANTHONY JC, 1995, EPIDEMIOL REV, V17, P1;ARMENIAN HK, 1998, AM J EPIDEMIOL, V148, P269;BADAWI MA, 1999, SOC PSYCH PSYCH EPID, V34, P91, DOI 10.1007/S001270050117;BURT VL, 1995, HYPERTENSION, V26, P60, DOI 10.1161/01.HYP.26.1.60;EATON WW, 1997, ARCH GEN PSYCHIAT, V54, P993;EATON WW, 1984, ARCH GEN PSYCHIAT, V41, P942;FORD DE, 1998, ARCH INTERN MED, …	BACKGROUND: THIS STUDY EVALUATES THE ROLE OF DEPRESSION AS A SPECIFIC RISK FACTOR FOR HYPERTENSION. METHODS: THIS STUDY ANALYZED THE PROSPECTIVE DATA IN THE BALTIMORE EPIDEMIOLOGIC CATCHMENT AREA (ECA) FOLLOW-UP STUDY (N = 1920), A LONGITUDINAL POPULATION-BASED STUDY OF MENTAL ILLNESS IN EAST BALTIMORE. INCIDENT CASES OF HYPERTENSION AS ASSESSED BY SELF-REPORT (N = 148) IN 1993 WERE COMPARED TO T…	JOHNS HOPKINS MED INST, WELCH CTR PREVENT EPIDEMIOL & CLIN RES, DEPT MED, BALTIMORE, MD 21205 USA.; JOHNS HOPKINS SCH HYG & PUBL HLTH, DEPT EPIDEMIOL, BALTIMORE, MD USA.; ADVANCEPCS, HUNT VALLEY, MD USA.; JOHNS HOPKINS SCH HYG & PUBL HLTH, DEPT MENTAL HYG, BALTIMORE, MD 21205 USA.; JOHNS HOPKINS SCH HYG & PUBL HLTH, DEPT HLTH POLICY & MANAGEMENT, BALTIMORE, MD 21205 USA.;	DEPRESSION; HIGH BLOOD PRESSURE; RISK FACTORS	10.1016/j.jad.2004.06.004	ARTICLE	DIAGNOSTIC INTERVIEW SCHEDULE; BLOOD-PRESSURE; POPULATION; HEALTH; RISK; DISEASE; PSYCHOPATHOLOGY; PREDICTOR; HISTORY; MEN	J AFFECT DISORDERS	J. AFFECT. DISORD.	ENGLISH	ELSEVIER	2004	JOHNS HOPKINS MED INST, WELCH CTR PREVENT EPIDEMIOL & CLIN RES, DEPT MED, 2024 E MONUMENT ST,SUITE 2-600, BALTIMORE, MD 21205 USA.	0165-0327	JOURNAL OF AFFECTIVE DISORDERS	91	INCIDENT HYPERTENSION ASSOCIATED WITH DEPRESSION IN THE BALTIMORE EPIDEMIOLOGIC CATCHMENT AREA FOLLOWUP STUDY	83	ISI	JOHNS HOPKINS UNIVERSITY; JOHNS HOPKINS MEDICINE; JOHNS HOPKINS UNIVERSITY; JOHNS HOPKINS UNIVERSITY; MARYLAND DEPARTMENT OF HEALTH AND MENTAL HYGIENE; JOHNS HOPKINS UNIVERSITY	JOHNS HOPKINS MED INST	MEYER CM, 2004, J AFFECT DISORDERS	MEYER CM, 2004, J AFFECT DISORDERS
COMPTON M;GORDON T;GOULDING S;ESTERBERG M;CARTER T;LEINER A;WEISS P;DRUSS B;WALKER E;KASLOW N	ADDINGTON D, 1990, SCHIZOPHR RES, V3, P247, DOI 10.1016/0920-9964(90)90005-R;ADDINGTON J, 2004, PSYCHOL MED, V34, P277, DOI 10.1017/S0033291703001156;BARNES TRE, 2000, BRIT J PSYCHIAT, V177, P207, DOI 10.1192/BJP.177.3.207;BARNES TRE, 2006, BRIT J PSYCHIAT, V188, P237, DOI 10.1192/BJP.BP.104.007237;BIRCHWOOD M, 1994, ACTA PSYCHIAT SCAND, V89, P62, DOI 10.1111/J.1600-0447.1994.TB01487.X;BIRCHWOOD …	OBJECTIVE: DURATION OF UNTREATED PSYCHOSIS (DUP) HAS BEEN ASSOCIATED WITH POOR EARLY COURSE OUTCOMES OF NONAFFECTIVE PSYCHOTIC DISORDERS; HOWEVER, LESS IS KNOWN ABOUT PREDICTORS OF DUP. THIS STUDY EXAMINED PATIENT-LEVEL PREDICTORS OF DUP AND CLINICAL CORRELATES OF BOTH DUP AND DURATION OF UNTREATED ILLNESS (DUI), BOTH OF WHICH HAVE BEEN IMPLICATED AS PROGNOSTIC INDICATORS. METHOD: PARTICIPANTS IN…	EMORY UNIV, SCH MED, DEPT PSYCHIAT & BEHAV SCI, ATLANTA, GA 30303 USA.; EMORY UNIV, GRAD SCH ARTS & SCI, DEPT PSYCHOL, ATLANTA, GA 30303 USA.; EMORY UNIV, DEPT BIOSTAT, ATLANTA, GA 30303 USA.; EMORY UNIV, DEPT HLTH POLICY & MANAGEMENT, ROLLINS SCH PUBL HLTH, ATLANTA, GA 30303 USA.;		10.4088/JCP.09m05704yel	ARTICLE	PREMORBID ADJUSTMENT; NONAFFECTIVE PSYCHOSIS; HEALTH-SERVICES; HELP-SEEKING; DSM-IV; SCHIZOPHRENIA; SCALE; ONSET; DETERMINANTS; SYMPTOMS	J CLIN PSYCHIAT	J. CLIN. PSYCHIATRY	ENGLISH	PHYSICIANS POSTGRADUATE PRESS	2011	COMPTON, MT (CORRESPONDING AUTHOR), EMORY UNIV, SCH MED, DEPT PSYCHIAT & BEHAV SCI, 49 JESSE HILL JR DR,SE,ROOM 333, ATLANTA, GA 30303 USA.	0160-6689	JOURNAL OF CLINICAL PSYCHIATRY	46	PATIENTLEVEL PREDICTORS AND CLINICAL CORRELATES OF DURATION OF UNTREATED PSYCHOSIS AMONG HOSPITALIZED FIRSTEPISODE PATIENTS	72	ISI	EMORY UNIVERSITY; EMORY UNIVERSITY; EMORY UNIVERSITY; EMORY UNIVERSITY; ROLLINS SCHOOL PUBLIC HEALTH	EMORY UNIV	COMPTON MT, 2011, J CLIN PSYCHIAT	COMPTON MT, 2011, J CLIN PSYCHIAT
KIM J;LEE J;THORNHILL T;DENNETT J;LU H;HOWELL B;GRAU L;FIELLIN D;HEIMER R;GONSALVES G	ALIBRAHIM A, 2022, BMC HEALTH SERV RES, V22, DOI 10.1186/S12913-022-07886-7;ALTEKRUSE SF, 2020, PLOS ONE, V15, DOI 10.1371/JOURNAL.PONE.0227966;AMIRI S, 2021, DRUG ALCOHOL DEPEN, V224, DOI 10.1016/J.DRUGALCDEP.2021.108727;ATSDR, 2022, CDC SVI DOCUMENTATION 2020 INTERNET;BARRY DT, 2009, AM J ADDICTION, V18, P117, DOI 10.1080/10550490902772470;BEARDSLEY K, 2003, J SUBST ABUSE TREAT, V25, P279, DOI …	IMPORTANCETRANSPORTATION BARRIERS HAVE LONG BEEN ASSOCIATED WITH POORER HEALTH OUTCOMES; THIS BURDEN IS ESPECIALLY ACUTE FOR INDIVIDUALS WITH OPIOID USE DISORDER (OUD), A CHRONIC DISEASE OFTEN ASSOCIATED WITH LOW SOCIOECONOMIC STATUS. CONVENTIONAL TRAVEL TIME ANALYSES MAY NOT FULLY ACCOUNT FOR EXPERIENTIAL COMPONENTS OF TRAVEL, THEREBY UNDERSTATING THE TRUE TRAVEL BURDEN AND OVERSTATING TREATMENT…	YALE SCH PUBL HLTH, PUBL HLTH MODELING UNIT, 350 GEORGE ST,3RD FLOOR, NEW HAVEN, CT 06511 USA.; VIRGINIA TECH, COLL NAT RESOURCES & ENVIRONM, DEPT GEOG, BLACKSBURG, VA USA.; UNIV WESTERN ONTARIO, FAC SOCIAL SCI, DEPT GEOG & ENVIRONM, LONDON, ON, CANADA.; YALE SCH PUBL HLTH, DEPT EPIDEMIOL MICROBIAL DIS, NEW HAVEN, CT USA.; YALE SCH PUBL HLTH, PUBL HLTH MODELING UNIT, NEW HAVEN, CT USA.; YALE SCH …		10.1001/jamanetworkopen.2024.0209	ARTICLE	METHADONE; BARRIERS; PAIN; EMPLOYMENT; HEALTH; CARE	JAMA NETW OPEN	JAMA NETW. OPEN	ENGLISH	AMER MEDICAL ASSOC	2024	GONSALVES, G (CORRESPONDING AUTHOR), YALE SCH PUBL HLTH, PUBL HLTH MODELING UNIT, 350 GEORGE ST,3RD FLOOR, NEW HAVEN, CT 06511 USA.	2574-3805	JAMA NETWORK OPEN	3	ACCESSIBILITY OF OPIOID TREATMENT PROGRAMS BASED ON CONVENTIONAL VS PERCEIVED TRAVEL TIME MEASURES	7	ISI	YALE UNIVERSITY; VIRGINIA POLYTECHNIC INSTITUTE AND STATE UNIVERSITY; WESTERN UNIVERSITY (UNIVERSITY OF WESTERN ONTARIO); YALE UNIVERSITY; YALE UNIVERSITY; YALE UNIVERSITY; YALE UNIVERSITY; YALE UNIVERSITY; YALE UNIVERSITY	YALE SCH PUBL HLTH	KIM J, 2024, JAMA NETW OPEN	KIM J, 2024, JAMA NETW OPEN
ADAMS R;AKOBIRSHOEV I;BRENNER L;KATON J;MITRA M	ADAMS RS, 2019, J NEUROTRAUM, DOI 10.1089/NEU.2019.6451;ADANE AA, 2021, ARCH WOMEN MENT HLTH, V24, P543, DOI 10.1007/S00737-020-01099-9;ADMON LK, 2017, OBSTET GYNECOL, V130, P1319, DOI 10.1097/AOG.0000000000002357;AGENCY FOR HEALTHCARE RESEARCH AND QUALITY, INTR HCUP NAT INP SA;AKOBIRSHOEV I, 2017, DISABIL HEALTH J, V10, P406, DOI 10.1016/J.DHJO.2017.02.010;ALHUSEN JL, 2015, J WOMENS HEALTH, V24,…	OBJECTIVE:THERE HAVE BEEN NO SYSTEMATIC STUDIES OF PREGNANCY OUTCOMES AMONG WOMEN WITH TRAUMATIC BRAIN INJURY (TBI), POTENTIALLY LIMITING INFORMED CLINICAL CARE FOR WOMEN WITH SUCH INJURIES. THE PURPOSE OF THIS EXPLORATORY STUDY WAS TO EVALUATE PREGNANCY AND FETAL/NEONATAL OUTCOMES AMONG WOMEN WITH A TBI DIAGNOSIS RECORDED DURING THEIR DELIVERY HOSPITALIZATION COMPARED WITH WOMEN WITHOUT TBI. SET…	BRANDEIS UNIV, INST BEHAV HLTH, WALTHAM, MA USA.; BRANDEIS UNIV, LURIE INST DISABIL POLICY, HELLER SCH SOCIAL POLICY & MANAGEMENT, WALTHAM, MA USA.; VHA ROCKY MT MENTAL ILLNESS RES EDUC & CLIN CTR, AURORA, CO USA.; UNIV COLORADO, ANSCHUTZ MED CAMPUS, AURORA, CO USA.; US DEPT VET AFFAIRS PUGET SOUND HLTH CARE SYST, CTR INNOVAT VET CTR & VALUE DRIVEN CARE, HLTH SERV RES & DEV, SEATTLE, WA USA.; UNI…	DELIVERY; FETAL; NEONATAL; OUTCOMES; PREGNANCY; TRAUMATIC BRAIN INJURY	10.1097/HTR.0000000000000807	ARTICLE	INTIMATE PARTNER VIOLENCE; BIRTH OUTCOMES; SOCIOECONOMIC-STATUS; UNITED-STATES; US WOMEN; HEALTH; EPIDEMIOLOGY; DELIVERY	J HEAD TRAUMA REHAB	J. HEAD TRAUMA REHABIL.	ENGLISH	LIPPINCOTT WILLIAMS & WILKINS	2023	ADAMS, RS (CORRESPONDING AUTHOR), BOSTON UNIV, SCH PUBL HLTH, DEPT HLTH LAW POLICY & MANAGEMENT, 715 ALBANY ST, BOSTON, MA 02118 USA.	0885-9701	JOURNAL OF HEAD TRAUMA REHABILITATION	0	PREGNANCY FETAL AND NEONATAL OUTCOMES AMONG WOMEN WITH TRAUMATIC BRAIN INJURY	38	ISI	BRANDEIS UNIVERSITY; BRANDEIS UNIVERSITY; UNIVERSITY OF COLORADO SYSTEM; UNIVERSITY OF COLORADO ANSCHUTZ MEDICAL CAMPUS; UNIVERSITY OF WASHINGTON; UNIVERSITY OF WASHINGTON SEATTLE; BOSTON UNIVERSITY	BOSTON UNIV	ADAMS RS, 2023, J HEAD TRAUMA REHAB	ADAMS RS, 2023, J HEAD TRAUMA REHAB
LI Z;XIE E;CRAWFORD F;WARREN J;MCCONNELL K;COPPLE J;JOHNSON T;GONSALVES G	ABRAHAM AJ, 2018, HEALTH SERV RES, V53, P389, DOI 10.1111/1475-6773.12686;ALEXANDER MJ, 2018, EPIDEMIOLOGY, V29, P707, DOI 10.1097/EDE.0000000000000858, 10.1097/EDE.0000000000000858;???????????? ????? ?????????? ALEXANDROVA M., 2017, ???????? ???????? ???????, PROBLEMY DAL'NEGO VOSTOKA, P27;ANONYMOUS, GAME CHANGING USE DA;ANONYMOUS, COMPUTATIONAL MATH O;ANONYMOUS, CINCINNATI AREA GEOG;ANONYMOUS, …	BACKGROUND OPIOID MISUSE AND DEATHS ARE INCREASING IN THE UNITED STATES. IN 2017, OHIO HAD THE SECOND HIGHEST OVERDOSE RATES IN THE US, WITH THE CITY OF CINCINNATI EXPERIENCING A 50% RISE IN OPIOID OVERDOSES SINCE 2015. UNDERSTANDING THE TEMPORAL AND GEOGRAPHIC VARIATION IN OVERDOSE EMERGENCIES MAY HELP GUIDE PUBLIC POLICY RESPONSES TO THE OPIOID EPIDEMIC. METHODS AND FINDINGS WE USED A PUBLICLY …	YALE SCH PUBL HLTH, DEPT BIOSTAT, NEW HAVEN, CT USA.; YALE COLL, NEW HAVEN, CT USA.; YALE UNIV, DEPT ECOL & EVOLUTIONARY BIOL, NEW HAVEN, CT USA.; YALE UNIV, DEPT STAT & DATA SCI, NEW HAVEN, CT USA.; YALE SCH MANAGEMENT, NEW HAVEN, CT USA.; YALE SCH FORESTRY & ENVIRONM STUDIES, NEW HAVEN, CT USA.; YALE SCH PUBL HLTH, DEPT EPIDEMIOL MICROBIAL DIS, NEW HAVEN, CT 06510 USA.; YALE LAW SCH, NEW HAVEN,…		10.1371/journal.pmed.1002956	ARTICLE	OPIOID USE DISORDER; EPIDEMIC; DEPLOYMENT; NALOXONE; DEATHS	PLOS MED	PLOS MED.	ENGLISH	PUBLIC LIBRARY SCIENCE	2019	GONSALVES, GS (CORRESPONDING AUTHOR), YALE SCH PUBL HLTH, DEPT EPIDEMIOL MICROBIAL DIS, NEW HAVEN, CT 06510 USA.; GONSALVES, GS (CORRESPONDING AUTHOR), YALE LAW SCH, NEW HAVEN, CT 06511 USA.	1549-1277	PLOS MEDICINE	18	SUSPECTED HEROINRELATED OVERDOSES INCIDENTS IN CINCINNATI OHIO A SPATIOTEMPORAL ANALYSIS	16	ISI	YALE UNIVERSITY; YALE UNIVERSITY; YALE UNIVERSITY; YALE UNIVERSITY; YALE UNIVERSITY; YALE UNIVERSITY; YALE UNIVERSITY; YALE UNIVERSITY	YALE SCH PUBL HLTH;YALE LAW SCH	LI ZR, 2019, PLOS MED	LI ZR, 2019, PLOS MED
KU B;COMPTON M;WALKER E;DRUSS B	ALLARDYCE J, 2005, BRIT J PSYCHIAT, V187, P401, DOI 10.1192/BJP.187.5.401;ALLARDYCE J, 2006, SCHIZOPHRENIA BULL, V32, P592, DOI 10.1093/SCHBUL/SBL008;ANONYMOUS, 2018, EARLY INTERV PSYCHIA, DOI 10.1111/EIP.12314, DOI 10.1111/EIP.12314;BOGGESS LN, 2010, J QUANT CRIMINOL, V26, P351, DOI 10.1007/S10940-010-9093-7;BOSQUI TJ, 2014, SOC PSYCH PSYCH EPID, V49, P519, DOI 10.1007/S00127-013-0773-0;BOYDELL …	OBJECTIVE: ACCUMULATING EVIDENCE IMPLICATES SOCIAL CONTEXT IN THE ETIOLOGY OF PSYCHOSIS. ONE IMPORTANT LINE OF EPIDEMIOLOGIC RESEARCH POINTING TO A POTENTIALLY CAUSAL ROLE OF SOCIAL CONTEXT PERTAINS TO WHAT IS TERMED SOCIAL FRAGMENTATION. THE AUTHORS CONDUCTED A SYSTEMATIC REVIEW OF THE RELATIONSHIP BETWEEN AREA-LEVEL SOCIAL FRAGMENTATION AND PSYCHOSIS. DATA SOURCES: THREE DATABASES (MEDLINE, PSY…	EMORY UNIV, DEPT PSYCHIAT & BEHAV SCI, SCH MED, 12 EXECUT PK DR NE 300, ATLANTA, GA 30329 USA.; NEW YORK STATE PSYCHIAT INST & HOSP, NEW YORK, NY 10032 USA.; COLUMBIA UNIV, DEPT PSYCHIAT, VAGELOS COLL PHYS & SURG, NEW YORK, NY USA.; EMORY UNIV, DEPT PSYCHOL, ATLANTA, GA 30329 USA.; EMORY UNIV, ROLLINS SCH PUBL HLTH, DEPT HLTH POLICY & MANAGEMENT, ATLANTA, GA 30329 USA.;		10.4088/JCP.21r13941	REVIEW	1ST EPISODE PSYCHOSIS; RESIDENTIAL INSTABILITY; ETHNIC-MINORITIES; MENTAL-DISORDERS; RURAL IRELAND; NEIGHBORHOOD; ENVIRONMENT; MULTILEVEL; URBANICITY; ONSET	J CLIN PSYCHIAT	J. CLIN. PSYCHIATRY	ENGLISH	PHYSICIANS POSTGRADUATE PRESS	2022	KU, BS (CORRESPONDING AUTHOR), EMORY UNIV, DEPT PSYCHIAT & BEHAV SCI, SCH MED, 12 EXECUT PK DR NE 300, ATLANTA, GA 30329 USA.	0160-6689	JOURNAL OF CLINICAL PSYCHIATRY	30	SOCIAL FRAGMENTATION AND SCHIZOPHRENIA A SYSTEMATIC REVIEW	83	ISI	EMORY UNIVERSITY; NEW YORK STATE PSYCHIATRY INSTITUTE; COLUMBIA UNIVERSITY; EMORY UNIVERSITY; EMORY UNIVERSITY; ROLLINS SCHOOL PUBLIC HEALTH	EMORY UNIV	KU BS, 2022, J CLIN PSYCHIAT	KU BS, 2022, J CLIN PSYCHIAT
IBRAGIMOV U;MANSFIELD R;YARBROUGH C;CUMMINGS J;LIVINGSTON M;HAARDÂ™RFER R;BEANE S;FADANELLI M;HALEY D;COOPER H	ADOLPHSEN S, 2017, NATL REV;ANONYMOUS, 2022, PROVISIONAL DRUG OVE;ALTEKRUSE SF, 2020, PLOS ONE, V15, DOI 10.1371/JOURNAL.PONE.0227966;AMIRI S, 2018, J SUBST ABUSE TREAT, V93, P26, DOI 10.1016/J.JSAT.2018.07.006;ANONYMOUS, 2021, HEALTH INSURANCE COVERAGE IN THE UNITED STATES: 2020 (P60-274);AUSTIN AE, 2021, AM J EPIDEMIOL, V190, P1760, DOI 10.1093/AJE/KWAB130;AVERETT SL, 2019, HEALTH ECON, V28, P1…	BACKGROUND: OPIOID-RELATED OVERDOSES ARE A MAJOR CAUSE OF MORTALITY IN THE US. MEDICAID EXPANSION IS POSITED TO REDUCE OPIOID OVERDOSE-RELATED MORTALITY (OORM), AND MAY HAVE A PARTICULARLY STRONG EFFECT AMONG PEOPLE OF LOWER SOCIOECONOMIC STATUS. THIS STUDY ASSESSED THE ASSOCIATION BETWEEN STATE MEDICAID EXPANSION AND COUNTY LEVEL OORM RATES AMONG INDIVIDUALS WITH LOW EDUCATIONAL ATTAINMENT. METH…	EMORY UNIV, ROLLINS SCH PUBL HLTH, BEHAV SOCIAL & HLTH EDUC SCI DEPT, ATLANTA, GA 30322 USA.; EMORY UNIV, ROLLINS SCH PUBL HLTH, HLTH POLICY & MANAGEMENT DEPT, ATLANTA, GA 30322 USA.; BOSTON UNIV, SCH PUBL HLTH, DEPT COMMUNITY HLTH SCI, BOSTON, MA 02215 USA.;	MEDICAID EXPANSION; OPIOID EPIDEMIC; OPIOID OVERDOSE-RELATED MORTALITY RATES; DIFFERENCE-IN-DIFFERENCE MODELING	10.1016/j.drugalcdep.2022.109381	ARTICLE	AFFORDABLE CARE ACT; SUBSTANCE USE; MENTAL-HEALTH; USE DISORDER; COVERAGE; ACCESS; ADULTS; IMPACT	DRUG ALCOHOL DEPEN	DRUG ALCOHOL DEPEND.	ENGLISH	ELSEVIER IRELAND LTD	2022	IBRAGIMOV, U (CORRESPONDING AUTHOR), 1518 CLIFTON RD NE, ATLANTA, GA 30322 USA.	0376-8716	DRUG AND ALCOHOL DEPENDENCE	2	MEDICAID EXPANSION AND OPIOID OVERDOSE MORTALITY AMONG SOCIOECONOMICALLY DISADVANTAGED POPULATIONS IN THE US A DIFFERENCE IN DIFFERENCES ANALYSIS	233	ISI	EMORY UNIVERSITY; ROLLINS SCHOOL PUBLIC HEALTH; EMORY UNIVERSITY; ROLLINS SCHOOL PUBLIC HEALTH; BOSTON UNIVERSITY	U (CORRESPONDING AUTHOR)	IBRAGIMOV U, 2022, DRUG ALCOHOL DEPEN	IBRAGIMOV U, 2022, DRUG ALCOHOL DEPEN
HESDORFFER D;BEGLEY C	AHRQ, 2011, COMP EFFECTIVENESS R, V40, P1;ANONYMOUS, ACC HEALTHC AM;BAUTISTA RED, 2011, EPILEPSY BEHAV, V22, P495, DOI 10.1016/J.YEBEH.2011.07.032;BEGHI E, 2008, CNS DRUGS, V22, P861, DOI 10.2165/00023210-200822100-00006;BEGLEY CE, 2000, EPILEPSIA, V41, P342, DOI 10.1111/J.1528-1157.2000.TB00166.X;BEGLEY C, 2011, EPILEPSIA, V52, P957, DOI 10.1111/J.1528-1167.2010.02968.X;BISGAIER J, 2011, NEW ENG…	PURPOSE OF REVIEW THE INSTITUTE OF MEDICINE'S REPORT, EPILEPSY ACROSS THE SPECTRUM: PROMOTING HEALTH AND UNDERSTANDING CONTAINS TWO RECOMMENDATIONS FOR INCREASED EPILEPSY SURVEILLANCE AND ONE RECOMMENDATION ON PREVENTION IN EPILEPSY. EVIDENCE SUPPORTING THESE RECOMMENDATIONS AND THE INFORMATION THAT CAN BE GAINED FROM THEM IS REVIEWED. RECENT FINDINGS EXISTING EPILEPSY SURVEILLANCE DATA ARE INADE…	COLUMBIA UNIV, GERTRUDE H SERGIEVSKY CTR, DEPT EPIDEMIOL, NEW YORK, NY 10032 USA.; UNIV TEXAS HLTH SCI CTR HOUSTON, SCH PUBL HLTH, CTR HLTH SERV RES, DEPT MANAGEMENT & POLICY SCI, HOUSTON, TX USA.;	IOM REPORT; PREVENTION; SURVEILLANCE	10.1097/WCO.0b013e32835ef2c7	REVIEW	SUDDEN UNEXPECTED DEATH; UNITED-STATES; UNPROVOKED SEIZURES; SPECIALTY CARE; DISPARITIES; MORTALITY; COST; PREVALENCE; ACCESS; ADULTS	CURR OPIN NEUROL	CURR. OPIN. NEUROL.	ENGLISH	LIPPINCOTT WILLIAMS & WILKINS	2013	HESDORFFER, DC (CORRESPONDING AUTHOR), COLUMBIA UNIV, GERTRUDE H SERGIEVSKY CTR, 630 WEST 168TH ST, NEW YORK, NY 10032 USA.	1350-7540	CURRENT OPINION IN NEUROLOGY	26	SURVEILLANCE OF EPILEPSY AND PREVENTION OF EPILEPSY AND ITS SEQUELAE LESSONS FROM THE INSTITUTE OF MEDICINE REPORT	26	ISI	COLUMBIA UNIVERSITY; UNIVERSITY OF TEXAS SYSTEM; UNIVERSITY OF TEXAS HEALTH SCIENCE CENTER HOUSTON; UNIVERSITY OF TEXAS SCHOOL PUBLIC HEALTH	COLUMBIA UNIV	HESDORFFER DC, 2013, CURR OPIN NEUROL	HESDORFFER DC, 2013, CURR OPIN NEUROL
BIENVENU O;COLANTUONI E;MENDEZ-TELLEZ P;SHANHOLTZ C;DENNISON-HIMMELFARB C;PRONOVOST P;NEEDHAM D	ARNBERG FK, 2012, J TRAUMA STRESS, V25, P721, DOI 10.1002/JTS.21758;ASUKAI N, 2002, J NERV MENT DIS, V190, P175, DOI 10.1097/00005053-200203000-00006;BERNARD GR, 1994, AM J RESP CRIT CARE, V149, P818, DOI 10.1164/AJRCCM.149.3.7509706;BIENVENU OJ, 2013, PSYCHOL MED, V43, P2657, DOI 10.1017/S0033291713000214;BIENVENU OJ, 2013, CHEST, V144, P24, DOI 10.1378/CHEST.12-0908;BIENVENU OJ, 2012, AM J RESP…	OBJECTIVE: TO EVALUATE THE COOCCURRENCE, AND PREDICTORS OF REMISSION, OF GENERAL ANXIETY, DEPRESSION, AND POSTTRAUMATIC STRESS DISORDER SYMPTOMS DURING 2-YEAR FOLLOW-UP IN SURVIVORS OF ACUTE LUNG INJURY TREATED IN AN ICU. DESIGN: PROSPECTIVE COHORT STUDY, WITH FOLLOW-UP AT 3, 6, 12, AND 24 MONTHS POST-ACUTE LUNG INJURY. SETTING: THIRTEEN MEDICAL AND SURGICAL ICUS IN FOUR HOSPITALS. PATIENTS: SURV…	JOHNS HOPKINS UNIV, SCH MED, DEPT PSYCHIAT & BEHAV SCI, BALTIMORE, MD 21205 USA.; JOHNS HOPKINS UNIV, SCH MED, OUTCOMES AFTER CRIT ILLNESS & SURG OACIS GRP, BALTIMORE, MD 21205 USA.; JOHNS HOPKINS UNIV, BLOOMBERG SCH PUBL HLTH, DEPT MENTAL HLTH, BALTIMORE, MD 21205 USA.; JOHNS HOPKINS UNIV, BLOOMBERG SCH PUBL HLTH, DEPT BIOSTAT, BALTIMORE, MD 21205 USA.; JOHNS HOPKINS UNIV, SCH MED, DEPT ANESTHES…	ACUTE LUNG INJURY; ANXIETY; ASSESSMENTS; DEPRESSION; EPIDEMIOLOGY; PATIENT OUTCOMES; POSTTRAUMATIC STRESS DISORDER	10.1097/CCM.0000000000000752	ARTICLE	RESPIRATORY-DISTRESS-SYNDROME; CARE-UNIT SURVIVORS; DSM-IV DISORDERS; QUALITY-OF-LIFE; HOSPITAL ANXIETY; SOCIOECONOMIC-STATUS; PHYSICAL FUNCTION; CRITICAL ILLNESS; CRITICALLY-ILL; SOCIAL SUPPORT	CRIT CARE MED	CRIT. CARE MED.	ENGLISH	LIPPINCOTT WILLIAMS & WILKINS	2015	BIENVENU, OJ (CORRESPONDING AUTHOR), JOHNS HOPKINS UNIV, SCH MED, DEPT PSYCHIAT & BEHAV SCI, BALTIMORE, MD 21205 USA.	0090-3493	CRITICAL CARE MEDICINE	87	COOCCURRENCE OF AND REMISSION FROM GENERAL ANXIETY DEPRESSION AND POSTTRAUMATIC STRESS DISORDER SYMPTOMS AFTER ACUTE LUNG INJURY A 2YEAR LONGITUDINAL STUDY	43	ISI	JOHNS HOPKINS UNIVERSITY; JOHNS HOPKINS UNIVERSITY; JOHNS HOPKINS UNIVERSITY; JOHNS HOPKINS BLOOMBERG SCHOOL OF PUBLIC HEALTH; JOHNS HOPKINS UNIVERSITY; JOHNS HOPKINS BLOOMBERG SCHOOL OF PUBLIC HEALTH; JOHNS HOPKINS UNIVERSITY; UNIVERSITY SYSTEM OF MARYLAND; UNIVERSITY OF MARYLAND BALTIMORE; JOHNS HOPKINS UNIVERSITY; JOHNS HOPKINS UNIVERSITY; JOHNS HOPKINS BLOOMBERG SCHOOL OF PUBLIC HEALTH; JOHNS…	JOHNS HOPKINS UNIV	BIENVENU OJ, 2015, CRIT CARE MED	BIENVENU OJ, 2015, CRIT CARE MED
SCHOOTMAN M;ANDRESEN E;WOLINSKY F;MALMSTROM T;MILLER J;MILLER D	ANDRESEN EM, 2006, J AGING HEALTH, V18, P28, DOI 10.1177/0898264305281001;ANONYMOUS, 1965, SURVEY SAMPLING;BLAZER DG, 2003, J GERONTOL A-BIOL, V58, P249;CEPEDA MS, 2003, AM J EPIDEMIOL, V158, P280, DOI 10.1093/AJE/KWG115;CHAIX B, 2006, J EPIDEMIOL COMMUN H, V60, P427, DOI 10.1136/JECH.2005.040360;CHANDOLA T, 2001, HEALTH PLACE, V7, P105, DOI 10.1016/S1353-8292(01)00002-8;DALGARD OS, 1997, BRIT J …	AIM: TO INVESTIGATE THE ASSOCIATION BETWEEN ATTRIBUTES OF SUBJECT LOCATION AND INCIDENCE OF CLINICALLY RELEVANT LEVELS OF DEPRESSIVE SYMPTOMS (CRLDS), AND TO INVESTIGATE WHETHER AN ASSOCIATION REMAINED AFTER ADJUSTING FOR INDIVIDUAL-LEVEL FACTORS USING DATA FROM THE POPULATION-BASED AFRICAN AMERICAN HEALTH STUDY. METHODS: AN 11-ITEM DEPRESSION SCALE (CENTER FOR EPIDEMIOLOGIC STUDIES DEPRESSION SC…	WASHINGTON UNIV, DIV HLTH BEHAV RES, SCH MED, DEPT MED & PEDIAT, ST LOUIS, MO 63108 USA.; UNIV FLORIDA, DEPT EPIDEMIOL & BIOSTAT, COLL PUBL HLTH & HLTH PROFESS, GAINESVILLE, FL USA.; UNIV IOWA, COLL PUBL HLTH, DEPT HLTH POLICY & MANAGEMENT, IOWA CITY, IA USA.; ST LOUIS UNIV, SCH MED, DEPT PSYCHIAT, ST LOUIS, MO 63103 USA.; WASHINGTON UNIV, DIV BIOSTAT, SCH MED, ST LOUIS, MO 63108 USA.; INDIANA UN…		10.1136/jech.2006.050088	ARTICLE	SOCIOECONOMIC CONTEXT; LOGISTIC-REGRESSION; BUILT ENVIRONMENT; MENTAL-DISORDERS; SOCIAL SUPPORT; HEALTH; RISK; EVENTS; NUMBER; ADULTS	J EPIDEMIOL COMMUN H	J. EPIDEMIOL. COMMUNITY HEALTH	ENGLISH	BMJ PUBLISHING GROUP	2007	SCHOOTMAN, M (CORRESPONDING AUTHOR), WASHINGTON UNIV, DIV HLTH BEHAV RES, SCH MED, DEPT MED & PEDIAT, 4444 FOREST PK BLVD,BOX 8504, ST LOUIS, MO 63108 USA.	0143-005X	JOURNAL OF EPIDEMIOLOGY AND COMMUNITY HEALTH	25	NEIGHBOURHOOD ENVIRONMENT AND THE INCIDENCE OF DEPRESSIVE SYMPTOMS AMONG MIDDLEAGED AFRICAN AMERICANS	61	ISI	WASHINGTON UNIVERSITY (WUSTL); STATE UNIVERSITY SYSTEM OF FLORIDA; UNIVERSITY OF FLORIDA; UNIVERSITY OF IOWA; SAINT LOUIS UNIVERSITY; WASHINGTON UNIVERSITY (WUSTL); INDIANA UNIVERSITY SYSTEM; INDIANA UNIVERSITY INDIANAPOLIS; REGENSTRIEF INSTITUTE INC	WASHINGTON UNIV	SCHOOTMAN M, 2007, J EPIDEMIOL COMMUN H	SCHOOTMAN M, 2007, J EPIDEMIOL COMMUN H
ABBAFATI C;ABBAS K;ABBASI M;ABBASIFARD M;ABBASI-KANGEVARI M;ABBASTABAR H;ABD-ALLAH F;ABDELALIM A;ABDOLLAHI M;ABDOLLAHPOUR I;ABEDI A;ABEDI P;ABEGAZ K;ABOLHASSANI H;ABOSETUGN A;ABOYANS V;ABRAMS E;ABREU L;ABRIGO M;ABU H A;ABUALHASAN A;ABU-GHARBIEH E;ABU-RADDAD L;ABUSHOUK A;ACEBEDO A;ACKERMAN I;ADABI M;ADAIR T;ADAMU A;ADEBAYO O;ADEDEJI I;ADEKANMBI V;ADELSON J;ADEOYE A;ADETOKUNBOH O;ADHAM D;ADVANI S;A…	ABDEL-RAZEK W, 2019, WORLDS LARGEST HEPAT;AFSHIN A, 2019, LANCET, V393, P1958, DOI 10.1016/S0140-6736(19)30041-8;ANONYMOUS, 2006, PROGR GLOB ACC HIV A;ANONYMOUS, 2018, POL DECL 3 HIGH LEV;ANONYMOUS, 2018, INT CLASS DIS ICD;ANONYMOUS, 2018, KEY FACTS;ANONYMOUS, 2016, ACTION PLAN FOR THE PREVENTION AND CONTROL OF NON-COMMUNICABLE DISEASES IN THE WHO EUROPEAN REGION: POPULATION-LEVEL INTERVENTIONS P…	BACKGROUND IN AN ERA OF SHIFTING GLOBAL AGENDAS AND EXPANDED EMPHASIS ON NON-COMMUNICABLE DISEASES AND INJURIES ALONG WITH COMMUNICABLE DISEASES, SOUND EVIDENCE ON TRENDS BY CAUSE AT THE NATIONAL LEVEL IS ESSENTIAL. THE GLOBAL BURDEN OF DISEASES, INJURIES, AND RISK FACTORS STUDY (GBD) PROVIDES A SYSTEMATIC SCIENTIFIC ASSESSMENT OF PUBLISHED, PUBLICLY AVAILABLE, AND CONTRIBUTED DATA ON INCIDENCE, …	UNIV WASHINGTON, INST HLTH METR & EVALUAT, SEATTLE, WA 98195 USA.; UNIV ROMA LA SAPIENZA, DEPT JURID & ECON STUDIES, ROME, ITALY.; LONDON SCH HYG & TROP MED, CTR GLOBAL MENTAL HLTH CGMH, LONDON, ENGLAND.; LONDON SCH HYG & TROP MED, DEPT GLOBAL HLTH & DEV, LONDON, ENGLAND.; LONDON SCH HYG & TROP MED, DEPT HLTH SERV RES & POLICY, LONDON, ENGLAND.; LONDON SCH HYG & TROP MED, DEPT INFECT DIS EPIDEMIO…
KALARIA R;MAESTRE G;MAHINRAD S;ACOSTA D;AKINYEMI R;ALLADI S;ALLEGRI R;ARSHAD F;BABALOLA D;BAIYEWU O;BAK T;BELLAJ T;BRODIE-MENDS D;CARRILLO M;CELESTIN K;DAMASCENO A;DE S R;DE S R;DJIBUTI M;DREYER A;ELLAJOSYULA R;FAROMBI T;FRIEDLAND R;GARZA N;GBESSEMEHLAN A;GEORGIOU E;GOVIA I;GRINBERG L;GUERCHET M;GUGSSA S;GUMIKIRIZA-ONORIA J;HOGERVORST E;HORNBERGER M;IBANEZ A;IHARA M;ISSAC T;JÂ™NSSON L;KARANJA W;L…	AARSLAND D, 2010, BRAIN PATHOL, V20, P633, DOI 10.1111/J.1750-3639.2009.00369.X;ABUOM TO, 2011, APHASIOLOGY, V25, P559, DOI 10.1080/02687038.2010.538417;ABUTALEBI J, 2014, NEUROBIOL AGING, V35, P2126, DOI 10.1016/J.NEUROBIOLAGING.2014.03.010;ABUTALEBI J, 2012, CEREB CORTEX, V22, P2076, DOI 10.1093/CERCOR/BHR287;ACOSTA-BAENA N, 2011, LANCET NEUROL, V10, P213, DOI 10.1016/S1474-4422(10)70323-9;ACOS…	TWO OF EVERY THREE PERSONS LIVING WITH DEMENTIA RESIDE IN LOW- AND MIDDLE-INCOME COUNTRIES (LMICS). THE PROJECTED INCREASE IN GLOBAL DEMENTIA RATES IS EXPECTED TO AFFECT LMICS DISPROPORTIONATELY. HOWEVER, THE MAJORITY OF GLOBAL DEMENTIA CARE COSTS OCCUR IN HIGH-INCOME COUNTRIES (HICS), WITH DEMENTIA RESEARCH PREDOMINANTLY FOCUSING ON HICS. THIS IMBALANCE NECESSITATES LMIC-FOCUSED RESEARCH TO ENSU…	NEWCASTLE UNIV, TRANSLAT & CLIN RES INST, NEWCASTLE UPON TYNE, ENGLAND.; UNIV TEXAS RIO GRANDE VALLEY, DEPT NEUROSCI, ONE W UNIV BLVD, BROWNSVILLE, TX USA.; UNIV TEXAS RIO GRANDE VALLEY, DEPT HUMAN GENET, ONE W UNIV BLVD, BROWNSVILLE, TX USA.; ALZHEIMERS ASSOC, DIV MED & SCI RELAT, 225 NMICHIGAN AVE, CHICAGO, IL 60601 USA.; UNIV NACL PEDRO HENRIQUEZ URENA UNPHU, SANTO DOMINGO, DOMINICAN REP.; UNI…	ALZHEIMER'S DISEASE; DEMENTIA; DIVERSITY; HIGH-INCOME COUNTRIES; LOW -AND MIDDLE-INCOME COUNTRIES; RISK FACTORS; VASCULAR DEMENTIA	10.1002/alz.13836	REVIEW	VASCULAR COGNITIVE IMPAIRMENT; DOMINANT ALZHEIMERS-DISEASE; BILINGUAL ADVANTAGE; RISK-FACTORS; 2 LANGUAGES; STROKE; PREVALENCE; APHASIA; SPEECH; ADULTS	ALZHEIMERS DEMENT	ALZHEIMERS. DEMENT.	ENGLISH	WILEY	2024	ISMAIL, O (CORRESPONDING AUTHOR), ALZHEIMERS ASSOC, DIV MED & SCI RELAT, 225 NMICHIGAN AVE, CHICAGO, IL 60601 USA.	1552-5260	ALZHEIMERS & DEMENTIA	5	THE 2022 SYMPOSIUM ON DEMENTIA AND BRAIN AGING IN LOW AND MIDDLEINCOME COUNTRIES HIGHLIGHTS ON RESEARCH DIAGNOSIS CARE AND IMPACT	20	ISI	NEWCASTLE UNIVERSITY - UK; UNIVERSITY OF TEXAS SYSTEM; UNIVERSITY OF TEXAS RIO GRANDE VALLEY; UNIVERSITY OF TEXAS SYSTEM; UNIVERSITY OF TEXAS RIO GRANDE VALLEY; ALZHEIMER'S ASSOCIATION; UNIVERSITY OF IBADAN; NATIONAL INSTITUTE OF MENTAL HEALTH AND NEUROSCIENCES - INDIA; UNIVERSIDAD DE LA COSTA; UNIVERSITY OF IBADAN; UNIVERSITY OF IBADAN; UNIVERSITY OF EDINBURGH; UNIVERSITE DE TUNIS; UNIVERSITE DE…	DIV MED AND SCI RELAT	KALARIA R, 2024, ALZHEIMERS DEMENT	KALARIA R, 2024, ALZHEIMERS DEMENT
SURJANINGRUM E;RIYANTO E;YUSOF J;MUJAHADAH H	none	PURPOSE: THIS STUDY AIMS TO INVESTIGATE THE FEASIBILITY OF HEALTH CADRES IN INDONESIA TO TAKE PERINATAL DEPRESSION SCREENING IN THE COMMUNITY USING EDINBURGH POSTNATAL DEPRESSION SCALE (EPDS) AND WHOOLEY. DESIGN/METHODOLOGY/APPROACH: THE FIELD STUDY INVOLVED 11 HEALTH CADRES (COMMUNITY VOLUNTEERS WHO ASSIST IN MATERNAL AND CHILD HEALTH) WHO WERE TRAINED TO ADMINISTRATE EPDS AND WHOOLEY TOWARDS 36…	DEPARTMENT OF PSYCHOLOGY, FACULTY OF PSYCHOLOGY, UNIVERSITAS AIRLANGGA, SURABAYA, INDONESIA; FACULTY OF HUMANITIES, UNIVERSITAS AIRLANGGA, SURABAYA, INDONESIA; SCHOOL OF HUMAN RESOURCE DEVELOPMENT AND PSYCHOLOGY, FACULTY OF SOCIAL SCIENCES AND HUMANITIES, UNIVERSITI TEKNOLOGI MALAYSIA, KUALA LUMPUR, MALAYSIA	EPDS AND WHOOLEY; HEALTH CADRES; INDONESIA; PERINATAL DEPRESSION	10.1108/JPMH-03-2024-0035	ARTICLE		J PUBLIC MENT HEALTH	J. PUBLIC MENT. HEALTH	ENGLISH	EMERALD PUBLISHING	2024	E.R. SURJANINGRUM; DEPARTMENT OF PSYCHOLOGY, FACULTY OF PSYCHOLOGY, UNIVERSITAS AIRLANGGA, SURABAYA, INDONESIA; EMAIL: ENDANG.SURJANINGRUM@PSIKOLOGI.UNAIR.AC.ID	17465729	JOURNAL OF PUBLIC MENTAL HEALTH	0	PERINATAL DEPRESSION SCREENING BY HEALTH CADRES IN INDONESIA EPDS OR WHOOLEY	23	ISI	UNIVERSITAS AIRLANGGA;UNIVERSITAS AIRLANGGA;UNIVERSITI TEKNOLOGI MALAYSIA	NOTREPORTED;UNIVERSITAS AIRLANGGA;NOTREPORTED	SURJANINGRUM ER, 2024, J PUBLIC MENT HEALTH	SURJANINGRUM ER, 2024, J PUBLIC MENT HEALTH
LIU J;WU J;WANG J;CHEN S;YIN X;GONG Y	none	BACKGROUND: DEPRESSION IS ONE OF THE MOST COMMON TYPES OF MENTAL DISORDERS. GUIDED BY THE THEORY OF SOCIAL DETERMINANTS OF HEALTH (SDH), THE STUDY AIMED TO ASSESS THE PREVALENCE OF DEPRESSIVE SYMPTOMS AND TO IDENTIFY FACTORS RELATED TO DEPRESSIVE SYMPTOMS IN THE GENERAL POPULATION OF CHINA. METHODS: A CROSS-SECTIONAL, ONLINE SURVEY WAS CONDUCTED AMONG 101,392 RESIDENTS FROM 31 PROVINCES OF MAINLA…	DEPARTMENT OF SOCIAL MEDICINE AND HEALTH MANAGEMENT, SCHOOL OF PUBLIC HEALTH, TONGJI MEDICAL COLLEGE, HUAZHONG UNIVERSITY OF SCIENCE AND TECHNOLOGY, HUBEI, WUHAN, CHINA; DEPARTMENT OF PUBLIC HEALTH, SHIHEZI UNIVERSITY SCHOOL OF MEDICINE, XINJIANG, SHIHEZI, 832000, CHINA	DEPRESSIVE SYMPTOMS; PREVALENCE; SOCIAL DETERMINANTS OF HEALTH	10.1016/j.jad.2023.10.134	ARTICLE	CHINA; CROSS-SECTIONAL STUDIES; DEPRESSION; HUMANS; PREVALENCE; SOCIAL DETERMINANTS OF HEALTH; SOCIAL FACTORS; ADULT; AIR QUALITY STANDARD; ARTICLE; CAUSALITY; CHINA; CHINESE; COMMUNITY SUPPORT; CONCEPTUAL FRAMEWORK; CONFIDENTIALITY; CROSS-SECTIONAL STUDY; DEPRESSION; ECONOMIC STATUS; FEMALE; HEALTH CARE FACILITY; HUMAN; LIFESTYLE; MAJOR CLINICAL STUDY; MALE; MENTAL HEALTH; MULTILEVEL ANALYSIS; P…	J AFFECTIVE DISORD	J. AFFECTIVE DISORD.	ENGLISH	ELSEVIER B.V.	2024	Y. GONG; SCHOOL OF PUBLIC HEALTH, TONGJI MEDICAL COLLEGE, HUAZHONG UNIVERSITY OF SCIENCE AND TECHNOLOGY, WUHAN, 430030, CHINA; EMAIL: GONGYANHONG@HUST.EDU.CN	1650327	JOURNAL OF AFFECTIVE DISORDERS	2	PREVALENCE AND ASSOCIATED FACTORS FOR DEPRESSIVE SYMPTOMS AMONG THE GENERAL POPULATION FROM 31 PROVINCES IN CHINA THE UTILITY OF SOCIAL DETERMINANTS OF HEALTH THEORY	347	ISI	HUAZHONG UNIVERSITY OF SCIENCE AND TECHNOLOGY;SHIHEZI UNIVERSITY SCHOOL OF MEDICINE	NOTREPORTED;HUAZHONG UNIVERSITY OF SCIENCE AND TECHNOLOGY;NOTREPORTED	LIU J, 2024, J AFFECTIVE DISORD	LIU J, 2024, J AFFECTIVE DISORD
OIKONOMOU V;GKINTONI E;HALKIOPOULOS C;KARADEMAS E	none	BACKGROUND: CARING FOR INDIVIDUALS WITH MENTAL DISORDERS POSES SIGNIFICANT CHALLENGES FOR CAREGIVERS, OFTEN LEADING TO COMPROMISED QUALITY OF LIFE AND MENTAL HEALTH ISSUES SUCH AS STRESS, ANXIETY, AND DEPRESSION. THIS STUDY AIMS TO ASSESS THE EXTENT OF THESE CHALLENGES AMONG CAREGIVERS IN GREECE, IDENTIFYING WHICH DEMOGRAPHIC FACTORS INFLUENCE THEIR WELL-BEING. METHOD: A TOTAL OF 157 CAREGIVERS W…	SCHOOL OF SOCIAL SCIENCES, HELLENIC OPEN UNIVERSITY, PATRAS, 26335, GREECE; DEPARTMENT OF PSYCHIATRY, UNIVERSITY GENERAL HOSPITAL OF PATRAS, PATRAS, 26504, GREECE; DEPARTMENT OF MANAGEMENT SCIENCE AND TECHNOLOGY, UNIVERSITY OF PATRAS, PATRAS, 26334, GREECE; DEPARTMENT OF PSYCHOLOGY, UNIVERSITY OF CRETE, RETHYMNON, 74100, GREECE	ANXIETY; CAREGIVERS; CLINICAL SYMPTOMS; DEPRESSION; MENTAL DISORDERS; QUALITY OF LIFE; SOCIAL SUPPORT; STRESS	10.3390/healthcare12020269	ARTICLE		HEALTHCARE (BASEL)	HEALTHCARE (BASEL)	ENGLISH	MULTIDISCIPLINARY DIGITAL PUBLISHING INSTITUTE (MDPI)	2024	E. GKINTONI; DEPARTMENT OF PSYCHIATRY, UNIVERSITY GENERAL HOSPITAL OF PATRAS, PATRAS, 26504, GREECE; EMAIL: EVIGINTONI@UPATRAS.GR	22279032	HEALTHCARE (SWITZERLAND)	4	QUALITY OF LIFE AND INCIDENCE OF CLINICAL SIGNS AND SYMPTOMS AMONG CAREGIVERS OF PERSONS WITH MENTAL DISORDERS A CROSSSECTIONAL STUDY	12	ISI	HELLENIC OPEN UNIVERSITY;UNIVERSITY GENERAL HOSPITAL OF PATRAS;UNIVERSITY OF PATRAS;UNIVERSITY OF CRETE	NOTREPORTED;UNIVERSITY GENERAL HOSPITAL OF PATRAS;NOTREPORTED	OIKONOMOU V, 2024, HEALTHCARE (BASEL)	OIKONOMOU V, 2024, HEALTHCARE (BASEL)
WARDLE H;DEGENHARDT L;MARIONNEAU V;REITH G;LIVINGSTONE C;SPARROW M;TRAN L;BIGGAR B;BUNN C;FARRELL M;KESAITE V;POZNYAK V;QUAN J;REHM J;RINTOUL A;SHARMA M;SHIFFMAN J;SISTE K;UKHOVA D;VOLBERG R;SALIFU Y J;SAXENA S	none		SCHOOL OF SOCIAL AND POLITICAL SCIENCES, UNIVERSITY OF GLASGOW, GLASGOW, UNITED KINGDOM; NATIONAL DRUG AND ALCOHOL RESEARCH CENTRE, UNIVERSITY OF NEW SOUTH WALES, SYDNEY, NSW, AUSTRALIA; CENTRE FOR RESEARCH ON ADDICTION, CONTROL AND GOVERNANCE, UNIVERSITY OF HELSINKI, HELSINKI, FINLAND; SCHOOL OF PUBLIC HEALTH AND PREVENTIVE MEDICINE, MONASH UNIVERSITY, MELBOURNE, VIC, AUSTRALIA; HARVARD KENNEDY …		10.1016/S2468-2667(24)00167-1	REVIEW		LANCET PUBLIC HEALTH	LANCET PUBLIC HEALTH	ENGLISH	ELSEVIER LTD	2024	H. WARDLE; SCHOOL OF SOCIAL AND POLITICAL SCIENCES, UNIVERSITY OF GLASGOW, GLASGOW, G12 8RT, UNITED KINGDOM; EMAIL: HEATHER.WARDLE@GLASGOW.AC.UK	24682667	THE LANCET PUBLIC HEALTH	1	THE LANCET PUBLIC HEALTH COMMISSION ON GAMBLING	9	ISI	UNIVERSITY OF GLASGOW;UNIVERSITY OF NEW SOUTH WALES;UNIVERSITY OF HELSINKI;MONASH UNIVERSITY;HARVARD UNIVERSITY;HARVARD UNIVERSITY;MALAWI EPIDEMIOLOGY AND INTERVENTION RESEARCH UNIT;UNIVERSITY OF CAMBRIDGE;THE UNIVERSITY OF HONG KONG;INSTITUTE FOR MENTAL HEALTH POLICY RESEARCH;CAMPBELL FAMILY MENTAL HEALTH RESEARCH INSTITUTE;UNIVERSITY OF TORONTO;UNIVERSITY OF TORONTO;UNIVERSITY MEDICAL CENTER HA…	NOTREPORTED;UNIVERSITY OF GLASGOW;NOTREPORTED	WARDLE H, 2024, LANCET PUBLIC HEALTH	WARDLE H, 2024, LANCET PUBLIC HEALTH
STECHER C;CLOONAN S;DOMINO M	none	THE GLOBAL PREVALENCE OF DEPRESSION HAS RISEN OVER THE PAST THREE DECADES ACROSS ALL SOCIOECONOMIC GROUPS AND GEOGRAPHIC REGIONS, WITH A PARTICULARLY RAPID INCREASE IN PREVALENCE AMONG ADOLESCENTS (AGED 12?17 YEARS) IN THE UNITED STATES. DEPRESSION IMPOSES LARGE HEALTH, ECONOMIC, AND SOCIETAL COSTS, INCLUDING REDUCED LIFE SPAN AND QUALITY OF LIFE, MEDICAL COSTS, AND REDUCED EDUCATIONAL ATTAINMENT…	COLLEGE OF HEALTH SOLUTIONS, ARIZONA STATE UNIVERSITY, PHOENIX, AZ, UNITED STATES; THE CENTER FOR HEALTH INFORMATION AND RESEARCH, ARIZONA STATE UNIVERSITY, PHOENIX, AZ, UNITED STATES; DEPARTMENT OF PSYCHOLOGY, UNIVERSITY OF GEORGIA, ATHENS, GA, UNITED STATES	DEPRESSION; DEPRESSION TREATMENT; ECONOMIC CONSEQUENCES OF DEPRESSION; MENTAL HEALTH SERVICES; POPULATION HEALTH; PUBLIC HEALTH POLICY	10.1146/annurev-publhealth-061022-040533	REVIEW	ADOLESCENT; CHILD; COST OF ILLNESS; COST-BENEFIT ANALYSIS; DEPRESSION; HEALTH SERVICES ACCESSIBILITY; HUMANS; QUALITY OF LIFE; SOCIAL STIGMA; SOCIOECONOMIC FACTORS; UNITED STATES; ACCESS TO TREATMENT; ADOLESCENT; AGED; COST EFFECTIVENESS ANALYSIS; DEPRESSION; DISEASE MANAGEMENT; ECONOMIC INEQUALITY; HEALTH CARE POLICY; HEALTHY LIFESTYLE; HUMAN; MENTAL HEALTH; MENTAL HEALTH SERVICE; PHARMACOECONOM…	ANNU REV PUBLIC HEALTH	ANNU. REV. PUBLIC HEALTH	ENGLISH	ANNUAL REVIEWS INC.	2024		1637525	ANNUAL REVIEW OF PUBLIC HEALTH	6	THE ECONOMICS OF TREATMENT FOR DEPRESSION	45	ISI	ARIZONA STATE UNIVERSITY;ARIZONA STATE UNIVERSITY;UNIVERSITY OF GEORGIA	ARIZONA STATE UNIVERSITY;ARIZONA STATE UNIVERSITY;UNIVERSITY OF GEORGIA	STECHER C, 2024, ANNU REV PUBLIC HEALTH	STECHER C, 2024, ANNU REV PUBLIC HEALTH
QIN W;XU L;JING Y;HAN W;HU F	none	BACKGROUND: RELATIVE DEPRIVATION HAS BEEN CONFIRMED AS ONE OF THE PATHWAYS UNDERLYING THE LINK BETWEEN INCOME INEQUALITY AND HEALTH. HOWEVER, THE MECHANISM BETWEEN RELATIVE DEPRIVATION AND HEALTH WAS STILL UNCLEAR. THIS STUDY AIMED TO TEST THE MEDIATING ROLE OF DEPRESSION AND THE MODERATING ROLE OF SOCIAL SUPPORT IN THE ASSOCIATION BETWEEN RELATIVE DEPRIVATION AND QUALITY OF LIFE. METHODS: DATA W…	CENTER FOR HEALTH MANAGEMENT AND POLICY RESEARCH, SCHOOL OF PUBLIC HEALTH, CHEELOO COLLEGE OF MEDICINE, SHANDONG UNIVERSITY, JINAN, CHINA; NATIONAL HEALTH COMMISSION (NHC) KEY LAB OF HEALTH ECONOMICS AND POLICY RESEARCH (SHANDONG UNIVERSITY), JINAN, CHINA		10.1016/j.jad.2022.06.019	ARTICLE	ADULT; CHINA; CROSS-SECTIONAL STUDIES; DEPRESSION; HUMANS; QUALITY OF LIFE; SOCIAL SUPPORT; SURVEYS AND QUESTIONNAIRES; ADULT; ARTICLE; CHINA; CROSS-SECTIONAL STUDY; DATA ANALYSIS SOFTWARE; DEPRESSION; FEMALE; HUMAN; INTERVIEW; MAJOR CLINICAL STUDY; MALE; MEDIATION ANALYSIS; MIDDLE AGED; QUALITY OF LIFE; QUESTIONNAIRE; SELF REPORT; SOCIAL SUPPORT; SOCIAL SUPPORT ASSESSMENT; DEPRESSION; PSYCHOLOGY…	J AFFECTIVE DISORD	J. AFFECTIVE DISORD.	ENGLISH	ELSEVIER B.V.	2022	L. XU; CENTER FOR HEALTH MANAGEMENT AND POLICY RESEARCH, SCHOOL OF PUBLIC HEALTH, CHEELOO COLLEGE OF MEDICINE, SHANDONG UNIVERSITY, JINAN, WENHUAXI ROAD44#, 250012, CHINA; EMAIL: LZXU@SDU.EDU.CN	1650327	JOURNAL OF AFFECTIVE DISORDERS	13	RELATIVE DEPRIVATION DEPRESSION AND QUALITY OF LIFE AMONG ADULTS IN SHANDONG PROVINCE CHINA A CONDITIONAL PROCESS ANALYSIS BASED ON SOCIAL SUPPORT	312	ISI	SHANDONG UNIVERSITY;NATIONAL HEALTH COMMISSION (NHC) KEY LAB OF HEALTH ECONOMICS AND POLICY RESEARCH (SHANDONG UNIVERSITY)	NOTREPORTED;SHANDONG UNIVERSITY;NOTREPORTED	QIN W, 2022, J AFFECTIVE DISORD	QIN W, 2022, J AFFECTIVE DISORD
GONZALEZ J;FLORES I;TREMBLAY M;BARNETT M	none	LAY HEALTH WORKERS ENGAGING LATINO FATHERS: A QUALITATIVE STUDY. BEHAVIORAL PARENT TRAINING PROGRAMS (BPTS) ARE EVIDENCE-BASED INTERVENTIONS THAT HAVE BEEN SHOWN TO BE EFFECTIVE WHEN IMPLEMENTED IN VARIOUS CONTEXTS AND WITH DIFFERENT RACIAL/ETHNIC MINORITY FAMILIES. DESPITE EVIDENCE SHOWING THEIR EFFECTIVENESS WITHIN THE LATINX COMMUNITY, DISPARITIES IN ACCESS TO BPTS STILL PERSIST. IN ADDITION, …	DEPARTMENT OF COUNSELING, CLINICAL, & SCHOOL PSYCHOLOGY, UNIVERSITY OF CALIFORNIA, SANTA BARBARA, UNITED STATES	BEHAVIORAL PARENT TRAINING; FATHER ENGAGEMENT; LAY HEALTH WORKERS; MENTAL HEALTH DISPARITIES	10.1016/j.childyouth.2022.106601	ARTICLE	ARTICLE; CHILD; CHILD PARENT RELATION; CULTURAL VALUE; FATHER; FEMALE; HISPANIC; HUMAN; HUMAN EXPERIMENT; JUVENILE; LAY HEALTH WORKER; MACHISMO; MALE; MENTAL HEALTH; QUALITATIVE RESEARCH; SEX ROLE; TRAINING; WORKFORCE	CHILD YOUTH SERV REV	CHILD. YOUTH SERV. REV.	ENGLISH	ELSEVIER LTD	2022	J.C. GONZALEZ; DEPARTMENT OF COUNSELING, CLINICAL, & SCHOOL PSYCHOLOGY, UNIVERSITY OF CALIFORNIA, SANTA BARBARA, SANTA BARBARA, 18 OCEAN RD., 93106, UNITED STATES; EMAIL: JCGONZALEZ@UCSB.EDU	1907409	CHILDREN AND YOUTH SERVICES REVIEW	1	LAY HEALTH WORKERS ENGAGING LATINO FATHERS A QUALITATIVE STUDY	141	ISI	UNIVERSITY OF CALIFORNIA	NOTREPORTED;UNIVERSITY OF CALIFORNIA;NOTREPORTED	GONZALEZ JC, 2022, CHILD YOUTH SERV REV	GONZALEZ JC, 2022, CHILD YOUTH SERV REV
MAGWOOD O;SAAD A;RANGER D;VOLPINI K;RUKIKAMIRERA F;HARIDAS R;SAYFI S;ALEXANDER J;TAN Y;POTTIE K	none	BACKGROUND: AMONG YOUTH, SYMPTOMS OF DEPRESSION, ANXIETY, AND ALCOHOL USE ARE ASSOCIATED WITH CONSIDERABLE ILLNESS AND DISABILITY. YOUTH FACE MANY PERSONAL AND HEALTH SYSTEM BARRIERS IN ACCESSING MENTAL HEALTH CARE. MOBILE APPLICATIONS (APPS) OFFER YOUTH POTENTIALLY ACCESSIBLE, SCALABLE, AND ANONYMOUS THERAPY AND OTHER SUPPORT. RECENT SYSTEMATIC REVIEWS ON APPS TO REDUCE MENTAL HEALTH SYMPTOMS AM…	BRUY?RE RESEARCH INSTITUTE, OTTAWA, ON, CANADA; INTERDISCIPLINARY SCHOOL OF HEALTH SCIENCES, FACULTY OF HEALTH SCIENCES, UNIVERSITY OF OTTAWA, OTTAWA, ON, CANADA; SCHOOL OF EPIDEMIOLOGY AND PUBLIC HEALTH, UNIVERSITY OF OTTAWA, OTTAWA, ON, CANADA; DEPARTMENT OF FAMILY MEDICINE, UNIVERSITY OF OTTAWA, OTTAWA, ON, CANADA; FACULTY OF MEDICINE, UNIVERSITY OF BRITISH COLUMBIA, VANCOUVER, BC, CANADA; SCH…		10.1002/cl2.1398	REVIEW		CAMPBELL SYST REV	CAMPBELL SYST. REV.	ENGLISH	JOHN WILEY AND SONS INC	2024	O. MAGWOOD; BRUYERE RESEARCH INSTITUTE, OTTAWA, 85 PRIMROSE AVE, CANADA; EMAIL: OMAGWOOD@BRUYERE.ORG	18911803	CAMPBELL SYSTEMATIC REVIEWS	0	MOBILE APPS TO REDUCE DEPRESSIVE SYMPTOMS AND ALCOHOL USE IN YOUTH A SYSTEMATIC REVIEW AND METAANALYSIS A SYSTEMATIC REVIEW	20	ISI	BRUY?RE RESEARCH INSTITUTE;UNIVERSITY OF OTTAWA;UNIVERSITY OF OTTAWA;UNIVERSITY OF OTTAWA;UNIVERSITY OF BRITISH COLUMBIA;UNIVERSITY OF BRITISH COLUMBIA;UNIVERSITY OF OTTAWA;MCMASTER UNIVERSITY;QUEEN'S UNIVERSITY;WESTERN UNIVERSITY;DALHOUSIE UNIVERSITY	NOTREPORTED;BRUYERE RESEARCH INSTITUTE;NOTREPORTED	MAGWOOD O, 2024, CAMPBELL SYST REV	MAGWOOD O, 2024, CAMPBELL SYST REV
HEUMANN E;PALACIO S A;STOCK C;HEINRICHS K	none	OBJECTIVES: HIGHER EDUCATION STUDENTS IN GERMANY ARE VULNERABLE TO DEPRESSIVE SYMPTOMS. DESPITE AMPLE EVIDENCE, NO COMPREHENSIVE REVIEW HAS RECENTLY BEEN CONDUCTED. THUS, OUR SYSTEMATIC REVIEW AND META-ANALYSIS AIMS AT DESCRIBING THE EXTENT TO WHICH STUDENTS ARE AFFECTED BY DEPRESSIVE SYMPTOMS. METHODS: WE SEARCHED THREE DATABASES FOR ARTICLES REPORTING THE PREVALENCE RATES OF DEPRESSIVENESS AMON…	INSTITUTE OF HEALTH AND NURSING SCIENCE, CHARITÂ?UNIVERSITÂŽTSMEDIZIN BERLIN, FREIE UNIVERSITÂŽT BERLIN AND HUMBOLDT-UNIVERSITÂŽT ZU BERLIN, BERLIN, GERMANY; UNIT FOR HEALTH PROMOTION RESEARCH, UNIVERSITY OF SOUTHERN DENMARK, ESBJERG, DENMARK	DEPRESSION SYMPTOMS; HIGHER EDUCATION STUDENTS; MENTAL HEALTH; META-ANALYSIS; PREVALENCE	10.3389/phrs.2024.1606983	REVIEW	CORONAVIRUS DISEASE 2019; DATA EXTRACTION; DEPRESSION; FEMALE; GENDER; GERMANY; HUMAN; MALE; PANDEMIC; PREFERRED REPORTING ITEMS FOR SYSTEMATIC REVIEWS AND META-ANALYSES; PREVALENCE; PUBLICATION BIAS; QUALITY CONTROL; REVIEW; SEX DIFFERENCE; STUDENT; SYSTEMATIC REVIEW; TERTIARY EDUCATION	PUBLIC HEALTH REV	PUBLIC HEALTH REV.	ENGLISH	FRONTIERS MEDIA SA	2024	E. HEUMANN; INSTITUTE OF HEALTH AND NURSING SCIENCE, CHARITÂ?UNIVERSITÂŽTSMEDIZIN BERLIN, FREIE UNIVERSITÂŽT BERLIN AND HUMBOLDT-UNIVERSITÂŽT ZU BERLIN, BERLIN, GERMANY; EMAIL: EILEEN.HEUMANN@CHARITE.DE	3010422	PUBLIC HEALTH REVIEWS	2	DEPRESSIVE SYMPTOMS AMONG HIGHER EDUCATION STUDENTS IN GERMANYA SYSTEMATIC REVIEW AND METAANALYSIS	45	ISI	CHARITÂ?UNIVERSITÂŽTSMEDIZIN BERLIN;UNIVERSITY OF SOUTHERN DENMARK	NOTREPORTED;CHARITÂ?UNIVERSITÂŽTSMEDIZIN BERLIN;NOTREPORTED	HEUMANN E, 2024, PUBLIC HEALTH REV	HEUMANN E, 2024, PUBLIC HEALTH REV
WAUMANS R;MUNTINGH A;VELDWIJK J;W. H A;VAN B A;BATELAAN N	none	BACKGROUND: DEPRESSION IN ADOLESCENTS AND YOUNG ADULTS IS COMMON AND CAUSES CONSIDERABLE DISEASE BURDEN WHILE HAMPERING THEIR DEVELOPMENT, LEADING TO ADVERSE CONSEQUENCES IN LATER LIFE. ALTHOUGH TREATMENT IS AVAILABLE, YOUNG PEOPLE ARE A VULNERABLE GROUP REGARDING UPTAKE AND COMPLETION OF TREATMENT. TO IMPROVE THIS, INSIGHT INTO YOUTH?S PREFERENCES FOR TREATMENT IS ESSENTIAL. OBJECTIVE: THE AIM O…	AMSTERDAM PUBLIC HEALTH INSTITUTE AND GGZ INGEEST SPECIALIZED MENTAL HEALTH CARE, DEPARTMENT OF PSYCHIATRY, AMSTERDAM UMC, LOCATION VRIJE UNIVERSITEIT, AMSTERDAM, NETHERLANDS; ERASMUS SCHOOL OF HEALTH POLICY AND MANAGEMENT, ERASMUS CHOICE MODELLING CENTRE, ERASMUS UNIVERSITY ROTTERDAM, ROTTERDAM, NETHERLANDS		10.1007/s40258-023-00857-x	ARTICLE	ADOLESCENT; CHOICE BEHAVIOR; DEPRESSION; HUMANS; NETHERLANDS; PATIENT PREFERENCE; PSYCHOTHERAPY; TREATMENT OUTCOME; YOUNG ADULT; ANTIDEPRESSANT AGENT; ANXIOLYTIC AGENT; HYPNOTIC AGENT; PSYCHOTROPIC AGENT; ADOLESCENT; ADULT; ARTICLE; CLINICAL EFFECTIVENESS; CONTROLLED STUDY; DEPRESSION; FEMALE; FREQUENCY; HUMAN; MAJOR CLINICAL STUDY; MALE; MENTAL HEALTH CARE; THERAPEUTIC ALLIANCE; DECISION MAKING;…	APPL HEALTH ECON HEALTH POLICY	APPL. HEALTH ECON. HEALTH POLICY	ENGLISH	ADIS	2024	R.C. WAUMANS; AMSTERDAM PUBLIC HEALTH INSTITUTE AND GGZ INGEEST SPECIALIZED MENTAL HEALTH CARE, DEPARTMENT OF PSYCHIATRY, AMSTERDAM UMC, LOCATION VRIJE UNIVERSITEIT, AMSTERDAM, NETHERLANDS; EMAIL: RUTH.WAUMANS@DEVIERSPRONG.NL	11755652	APPLIED HEALTH ECONOMICS AND HEALTH POLICY	2	TREATMENT PREFERENCES OF ADOLESCENTS AND YOUNG ADULTS WITH DEPRESSIVE SYMPTOMS A DISCRETE CHOICE EXPERIMENT	22	ISI	LOCATION VRIJE UNIVERSITEIT;ERASMUS UNIVERSITY ROTTERDAM	NOTREPORTED;LOCATION VRIJE UNIVERSITEIT;NOTREPORTED	WAUMANS RC, 2024, APPL HEALTH ECON HEALTH POLICY	WAUMANS RC, 2024, APPL HEALTH ECON HEALTH POLICY
FIKRESELAM H;MEKDES S;HANA B	none	BACKGROUND: ACCESS TO AFFORDABLE, QUALITY-ASSURED ESSENTIAL MEDICINES IS CRUCIAL TO REDUCE THE BURDEN OF DISEASE. HOWEVER, ONE THIRD OF THE WORLD?S POPULATION LACKS REGULAR ACCESS TO ESSENTIAL MEDICINES. THE PURPOSE OF THIS STUDY WAS TO ASSESS THE AVAILABILITY, PRICE, AND AFFORDABILITY OF MEDICINES FOR MENTAL DISORDERS IN ADDIS ABABA, ETHIOPIA. METHODS: A CROSS-SECTIONAL STUDY WAS DONE IN SELECTE…	DEPARTMENT OF PHARMACOLOGY AND CLINICAL PHARMACY, SCHOOL OF PHARMACY, COLLEGE OF HEALTH SCIENCE, ADDIS ABABA UNIVERSITY, ADDIS ABABA, ETHIOPIA; DEPARTMENT OF PHARMACY, UNIVERSAL MEDICAL AND BUSINESS COLLEGE, ADDIS ABABA, ETHIOPIA	ACCESS TO MEDICINE; ETHIOPIA; LOW INCOME COUNTRY; MENTAL DISORDER	10.2147/RMHP.S409929	ARTICLE	AMITRIPTYLINE; CARBAMAZEPINE; CHLORPROMAZINE; CLOMIPRAMINE; CLOZAPINE; DIAZEPAM; FLUOXETINE; HALOPERIDOL; IMIPRAMINE; LAMOTRIGINE; LITHIUM CARBONATE; OLANZAPINE; PSYCHOTROPIC AGENT; RISPERIDONE; SERTRALINE; THIORIDAZINE; TRIFLUOPERAZINE; VALPROIC ACID; ARTICLE; CROSS-SECTIONAL STUDY; DATA ANALYSIS; DRUG BIOAVAILABILITY; DRUG COST; ETHIOPIA; HEALTH CARE POLICY; HUMAN; INCOME; LOW INCOME COUNTRY; M…	RISK MANAGE HEALTHC POLICY	RISK MANAGE. HEALTHC. POLICY	ENGLISH	DOVE MEDICAL PRESS LTD	2023	H. FIKRESELAM; DEPARTMENT OF PHARMACOLOGY AND CLINICAL PHARMACY, SCHOOL OF PHARMACY, COLLEGE OF HEALTH SCIENCE, ADDIS ABABA UNIVERSITY, ADDIS ABABA, ETHIOPIA; EMAIL: HABTEFIKRESELAM2007@GMAIL.COM	11791594	RISK MANAGEMENT AND HEALTHCARE POLICY	1	AVAILABILITY PRICE AND AFFORDABILITY OF PSYCHOTROPIC MEDICINES IN ADDIS ABABA ETHIOPI	16	ISI	ADDIS ABABA UNIVERSITY;UNIVERSAL MEDICAL AND BUSINESS COLLEGE	H. FIKRESELAM;ADDIS ABABA UNIVERSITY;NOTDECLARED	FIKRESELAM H, 2023, RISK MANAGE HEALTHC POLICY	FIKRESELAM H, 2023, RISK MANAGE HEALTHC POLICY
DAGISTAN E	none	INTRODUCTION: THE COVID-19 PANDEMIC HAS BEEN CHALLENGING THE HEALTH CARE SYSTEMS AND PUBLIC WELLBEING UNPRECEDENTEDLY. THE UNITED KINGDOM AND TURKIYE WERE THE COUNTRIES WORST HIT BY THE PANDEMIC IN THE WORLD HEALTH ORGANIZATION EUROPEAN REGION. PURPOSE: THIS REVIEW INVESTIGATED THE MENTAL HEALTH POLICIES IN THESE COUNTRIES WHICH DRAW A CONTRASTING PATTERN OF MENTAL HEALTH CARE, SOCIODEMOGRAPHIC B…	PUBLIC HEALTH AND POLICY WORKING GROUP, AMSTERDAM, NETHERLANDS; FRENCH SCHOOL OF PUBLIC HEALTH (ECOLE DES HAUTES ETUDES EN SANTÂ PUBLIQUE), PARIS, FRANCE	COVID-19; MENTAL HEALTH; MENTAL HEALTH CARE; MENTAL HEALTH POLICY; PUBLIC HEALTH	10.56508/mhgcj.v5i2.141	ARTICLE		MENT HEALTH	MENT. HEALTH.	ENGLISH	SCIENDO	2022	E. DAGISTAN; FRENCH SCHOOL OF PUBLIC HEALTH (ECOLE DES HAUTES ETUDES EN SANTÂ PUBLIQUE), PARIS, FRANCE; EMAIL: EDAGISTAN@GMAIL.COM	26122138	MENTAL HEALTH: GLOBAL CHALLENGES	0	MENTAL HEALTH POLICY REACTIONS DURING THE FIRST YEAR OF THE COVID19 PANDEMIC IN TWO WORSTHIT WHO EUROPEAN COUNTRIES A NARRATIVE REVIEW AND LESSONS FOR THE AFTERMATH OF MENTAL HEALTH CARE	5	ISI	PUBLIC HEALTH AND POLICY WORKING GROUP;FRENCH SCHOOL OF PUBLIC HEALTH (ECOLE DES HAUTES ETUDES EN SANTÂ PUBLIQUE)	NOTREPORTED;FRENCH SCHOOL OF PUBLIC HEALTH (ECOLE DES HAUTES ETUDES EN SANTÂ PUBLIQUE);NOTREPORTED	DAGISTAN E, 2022, MENT HEALTH	DAGISTAN E, 2022, MENT HEALTH
QIU D;LI Y;XIAO S;ZHOU L;LIU L;LIU H;GAO F;WU Q;AN Y;TANG Z	none	BACKGROUND: ALTHOUGH NATIONAL POLICIES IN CHINA ARE COMPREHENSIVE AND INSTRUCTIVE, A WIDE DISPARITY EXISTS BETWEEN DIFFERENT CITIES.Ã¿THE CURRENT STATUS OF PUBLIC MENTAL HEALTH SERVICES BY REGION IN CHINA REMAINS UNCLEAR. THIS STUDY AIMED TO INVESTIGATE POLICIES RELATED TO PUBLIC MENTAL HEALTH SERVICES, THE CONTACT COVERAGE OF PUBLIC MENTAL HEALTH SERVICES AND OUTCOMES OF SERVICE USERS. METHODS: …	DEPARTMENT OF SOCIAL MEDICINE AND HEALTH MANAGEMENT, XIANGYA SCHOOL OF PUBLIC HEALTH, CENTRAL SOUTH UNIVERSITY, 110 XIANGYA ROAD, HUNAN, CHANGSHA, 410078, CHINA; MENTAL HEALTH INSTITUTE, SECOND XIANGYA HOSPITAL, CENTRAL SOUTH UNIVERSITY, HUNAN, CHANGSHA, CHINA; THE AFFILIATED BRAIN HOSPITAL OF GUANGZHOU MEDICAL UNIVERSITY, GUANGDONG, GUANGZHOU, CHINA; WUHAN MENTAL HEALTH CENTER, HUBEI, WUHAN, CHI…	CHINA; CONTACT COVERAGE; MENTAL HEALTH SERVICE; SEVERE MENTAL ILLNESS	10.1186/s41256-024-00363-0	ARTICLE	ADULT; CHINA; CROSS-SECTIONAL STUDIES; FEMALE; HEALTH POLICY; HUMANS; MALE; MENTAL DISORDERS; MENTAL HEALTH SERVICES; MIDDLE AGED; ADULT; CHINA; CROSS-SECTIONAL STUDY; EPIDEMIOLOGY; FEMALE; HEALTH CARE POLICY; HUMAN; MALE; MENTAL DISEASE; MENTAL HEALTH SERVICE; MIDDLE AGED; THERAPY	GLOB HEALTH RES POLICY	GLOB. HEALTH. RES. POLICY	ENGLISH	BIOMED CENTRAL LTD	2024	S. XIAO; DEPARTMENT OF SOCIAL MEDICINE AND HEALTH MANAGEMENT, XIANGYA SCHOOL OF PUBLIC HEALTH, CENTRAL SOUTH UNIVERSITY, CHANGSHA, 110 XIANGYA ROAD, HUNAN, 410078, CHINA; EMAIL: XIAOSY@CSU.EDU.CN	23970642	GLOBAL HEALTH RESEARCH AND POLICY	0	PUBLIC MENTAL HEALTH SERVICES IN SOUTHERN CHINA AND RELATED HEALTH OUTCOMES AMONG INDIVIDUALS LIVING WITH SEVERE MENTAL ILLNESS	9	ISI	CENTRAL SOUTH UNIVERSITY;CENTRAL SOUTH UNIVERSITY;THE AFFILIATED BRAIN HOSPITAL OF GUANGZHOU MEDICAL UNIVERSITY;WUHAN MENTAL HEALTH CENTER;SHENZHEN KANGNING HOSPITAL;SHENZHEN MENTAL HEALTH CENTER;THE NINTH HOSPITAL OF CHANGSHA	NOTREPORTED;CENTRAL SOUTH UNIVERSITY;NOTREPORTED	QIU D, 2024, GLOB HEALTH RES POLICY	QIU D, 2024, GLOB HEALTH RES POLICY
MAALOUF F;ALROJOLAH L;AKOURY-DIRANI L;BARAKAT M;BRENT D;ELBEJJANI M;SHAMSEDDEEN W;GHANDOUR L	none	INTRODUCTION: PSYCHIATRIC DISORDERS ARE AMONG THE LEADING CAUSES OF DISABILITY IN CHILDREN AND ADOLESCENTS GLOBALLY. IN LEBANON, A COUNTRY THAT HAS ENDURED A PROLONGED HISTORY OF CONFLICT AND ECONOMIC AND POLITICAL UNCERTAINTY, MENTAL HEALTH SURVEYS IN CHILDREN AND ADOLESCENTS HAVE BEEN LIMITED TO SPECIFIC DISORDERS OR SPECIFIC SETTINGS OR CITIES. PALS (PSYCHOPATHOLOGY IN CHILDREN AND ADOLESCENTS…	DEPARTMENT OF PSYCHIATRY, FACULTY OF MEDICINE, AMERICAN UNIVERSITY OF BEIRUT, RIAD EL-SOLH, P.O. BOX 11-0236, BEIRUT, 1107 2020, LEBANON; DEPARTMENT OF PSYCHIATRY, UNIVERSITY OF PITTSBURGH SCHOOL OF MEDICINE, PITTSBURGH, PA, UNITED STATES; CLINICAL RESEARCH INSTITUTE AND DEPARTMENT OF INTERNAL MEDICINE, AMERICAN UNIVERSITY OF BEIRUT, BEIRUT, LEBANON; DEPARTMENT OF EPIDEMIOLOGY AND POPULATION HEAL…	ADOLESCENTS; CHILDREN; EPIDEMIOLOGY; PREVALENCE; PSYCHIATRIC DISORDERS	10.1007/s00127-021-02208-4	ARTICLE	ADOLESCENT; ANXIETY DISORDERS; CHILD; CHILD; PRESCHOOL; HUMANS; LEBANON; MENTAL DISORDERS; PSYCHOPATHOLOGY; SURVEYS AND QUESTIONNAIRES; ADOLESCENT; ANXIETY DISORDER; CHILD; HUMAN; LEBANON; MENTAL DISEASE; PRESCHOOL CHILD; PSYCHOLOGY; QUESTIONNAIRE	SOC PSYCHIATRY PSYCHIATR EPIDEMIOL	SOC. PSYCHIATRY PSYCHIATR. EPIDEMIOL.	ENGLISH	SPRINGER SCIENCE AND BUSINESS MEDIA DEUTSCHLAND GMBH	2022	F.T. MAALOUF; DEPARTMENT OF PSYCHIATRY, FACULTY OF MEDICINE, AMERICAN UNIVERSITY OF BEIRUT, BEIRUT, RIAD EL-SOLH, P.O. BOX 11-0236, 1107 2020, LEBANON; EMAIL: FM38@AUB.EDU.LB; L.A. GHANDOUR; DEPARTMENT OF EPIDEMIOLOGY AND POPULATION HEALTH, FACULTY OF HEALTH SCIENCES, AMERICAN UNIVERSITY OF BEIRUT, BEIRUT, RIAD EL-SOLH, P.O. BOX 11-0236, 1107 2020, LEBANON; EMAIL: LG01@AUB.EDU.LB	9337954	SOCIAL PSYCHIATRY AND PSYCHIATRIC EPIDEMIOLOGY	14	PSYCHOPATHOLOGY IN CHILDREN AND ADOLESCENTS IN LEBANON STUDY PALS A NATIONAL HOUSEHOLD SURVEY	57	ISI	AMERICAN UNIVERSITY OF BEIRUT;UNIVERSITY OF PITTSBURGH SCHOOL OF MEDICINE;AMERICAN UNIVERSITY OF BEIRUT;AMERICAN UNIVERSITY OF BEIRUT	NOTREPORTED;AMERICAN UNIVERSITY OF BEIRUT;NOTREPORTED;NOTREPORTED;AMERICAN UNIVERSITY OF BEIRUT;NOTREPORTED	MAALOUF FT, 2022, SOC PSYCHIATRY PSYCHIATR EPIDEMIOL	MAALOUF FT, 2022, SOC PSYCHIATRY PSYCHIATR EPIDEMIOL
BARNETT P;STEARE T;DEDAT Z;PILLING S;MCCRONE P;KNAPP M;COOKE E;LAMIREL D;DAWSON S;GOLDBLATT P;HATCH S;HENDERSON C;JENKINS R;K T;MACHIN K;SIMPSON A;SHAH P;STEVENS M;WEBBER M;JOHNSON S;LLOYD-EVANS B	none	BACKGROUND: POOR SOCIAL CIRCUMSTANCES CAN INDUCE, EXACERBATE AND PROLONG SYMPTOMS OF MENTAL HEALTH CONDITIONS, WHILE HAVING A MENTAL HEALTH CONDITION CAN ALSO LEAD TO WORSE SOCIAL OUTCOMES. MANY PEOPLE WITH MENTAL HEALTH CONDITIONS PRIORITISE IMPROVEMENT IN SOCIAL AND FUNCTIONAL OUTCOMES OVER REDUCTION IN CLINICAL SYMPTOMS. INTERVENTIONS THAT IMPROVE SOCIAL CIRCUMSTANCES IN THIS POPULATION SHOULD…	CENTRE FOR OUTCOMES RESEARCH AND EFFECTIVENESS, RESEARCH DEPARTMENT OF CLINICAL, EDUCATIONAL AND HEALTH PSYCHOLOGY, UNIVERSITY COLLEGE LONDON, 1-19 TORRINGTON PLACE, LONDON, WC1E 7HB, UNITED KINGDOM; DEPARTMENT OF PSYCHIATRY, MENTAL HEALTH POLICY RESEARCH UNIT, UNIVERSITY COLLEGE LONDON, LONDON, UNITED KINGDOM; NATIONAL COLLABORATING CENTRE FOR MENTAL HEALTH, ROYAL COLLEGE OF PSYCHIATRISTS, LONDO…	INTERVENTION; MENTAL HEALTH CONDITIONS; REVIEW; SOCIAL CIRCUMSTANCES	10.1186/s12888-022-03864-9	ARTICLE	HOMELESS PERSONS; HUMANS; MENTAL DISORDERS; MENTAL HEALTH; MENTAL HEALTH SERVICES; SOCIAL ISOLATION; ARTICLE; BASIC NEEDS; CARE BEHAVIOR; CITIZENSHIP; COCHRANE LIBRARY; COST EFFECTIVENESS ANALYSIS; ECONOMIC EVALUATION; EDUCATION; EMBASE; EMPLOYMENT; HOMELESSNESS; HOUSING; HUMAN; HUMAN EXPERIMENT; MEDLINE; MENTAL HEALTH; MENTAL HEALTH SERVICE; MONEY; PSYCINFO; RANDOMIZED CONTROLLED TRIAL (TOPIC); …	BMC PSYCHIATRY	BMC PSYCHIATRY	ENGLISH	BIOMED CENTRAL LTD	2022	P. BARNETT; CENTRE FOR OUTCOMES RESEARCH AND EFFECTIVENESS, RESEARCH DEPARTMENT OF CLINICAL, EDUCATIONAL AND HEALTH PSYCHOLOGY, UNIVERSITY COLLEGE LONDON, LONDON, 1-19 TORRINGTON PLACE, WC1E 7HB, UNITED KINGDOM; EMAIL: PHOEBE.BARNETT@UCL.AC.UK	1471244X	BMC PSYCHIATRY	14	INTERVENTIONS TO IMPROVE SOCIAL CIRCUMSTANCES OF PEOPLE WITH MENTAL HEALTH CONDITIONS A RAPID EVIDENCE SYNTHESIS	22	ISI	UNIVERSITY COLLEGE LONDON;UNIVERSITY COLLEGE LONDON;NATIONAL COLLABORATING CENTRE FOR MENTAL HEALTH;CAMDEN AND ISLINGTON NHS FOUNDATION TRUST;UNIVERSITY OF GREENWICH;LONDON SCHOOL OF ECONOMICS AND POLITICAL SCIENCE;CAMDEN AND ISLINGTON NHS FOUNDATION TRUST AND MH POLICY RESEARCH UNIT;UNIVERSITY OF BRISTOL;UNIVERSITY COLLEGE LONDON;KINGS COLLEGE LONDON;KINGS COLLEGE LONDON;KINGS COLLEGE LONDON;SOU…	NOTREPORTED;UNIVERSITY COLLEGE LONDON;NOTREPORTED	BARNETT P, 2022, BMC PSYCHIATRY	BARNETT P, 2022, BMC PSYCHIATRY
JIMENEZ D;PARK M;ROSEN D;JOO J;GARZA D;WEINSTEIN E;CONNER K;SILVA C;OKEREKE O	none	MENTAL HEALTHCARE DISPARITIES ARE ROUTINELY DOCUMENTED, YET THEY REMAIN WIDER THAN IN MOST OTHER AREAS OF HEALTHCARE SERVICES AND COMMON MENTAL DISORDERS (DEPRESSION AND ANXIETY) CONTINUE TO BE ONE OF THE HIGHEST HEALTH BURDENS FOR OLDER PEOPLE OF COLOR. TO ADDRESS DISPARITIES IN MENTAL HEALTH SERVICES FOR OLDER PEOPLE OF COLOR, THE NARRATIVE MUST MOVE BEYOND SIMPLY DOCUMENTING THESE INEQUITIES A…	DEPARTMENT OF PSYCHIATRY AND BEHAVIORAL SCIENCES (DEJ, DMG), UNIVERSITY OF MIAMI MILLER SCHOOL OF MEDICINE, MIAMI, FL; DEPARTMENT OF FAMILY HEALTH CARE NURSING (MP), UNIVERSITY OF CALIFORNIA SAN FRANCISCO SCHOOL OF NURSING, SAN FRANCISCO, CA; SCHOOL OF SOCIAL WORK (DR), UNIVERSITY OF PITTSBURGH, PITTSBURGH, PA, UNITED STATES; DEPARTMENT OF PSYCHIATRY (JHJ, OO), HARVARD MEDICAL SCHOOL, BOSTON, MA;…	DISPARITIES; HEALTH BELIEFS; LATE LIFE MENTAL HEALTH; OLDER PEOPLE OF COLOR; PREVENTION; STIGMA	10.1016/j.jagp.2022.07.001	REVIEW	AGED; HEALTH SERVICES ACCESSIBILITY; HEALTHCARE DISPARITIES; HUMANS; MENTAL HEALTH; MENTAL HEALTH SERVICES; SKIN PIGMENTATION; AFRICAN AMERICAN; ASIAN AMERICAN; BLACK PERSON; COMORBIDITY; CULTURAL ANTHROPOLOGY; DIAGNOSTIC TEST; DISCRIMINATION AGAINST SEXUAL AND GENDER MINORITIES; HEALTH BELIEF; HEALTH CARE ACCESS; HEALTH CARE DISPARITY; HEALTH CARE UTILIZATION; HEALTH EQUITY; HEALTH SERVICE; HISP…	AM J GERIATR PSYCHIATRY	AM. J. GERIATR. PSYCHIATRY	ENGLISH	ELSEVIER B.V.	2022	D.E. JIMENEZ; DEPARTMENT OF PSYCHIATRY AND BEHAVIORAL SCIENCES (DEJ, DMG), UNIVERSITY OF MIAMI MILLER SCHOOL OF MEDICINE, MIAMI, 1120 NW 14TH ST, SUITE 1436, 33136; EMAIL: DEJ18@MIAMI.EDU	10647481	AMERICAN JOURNAL OF GERIATRIC PSYCHIATRY	18	CENTERING CULTURE IN MENTAL HEALTH DIFFERENCES IN DIAGNOSIS TREATMENT AND ACCESS TO CARE AMONG OLDER PEOPLE OF COLOR	30	ISI	UNIVERSITY OF MIAMI MILLER SCHOOL OF MEDICINE;UNIVERSITY OF CALIFORNIA SAN FRANCISCO SCHOOL OF NURSING;UNIVERSITY OF PITTSBURGH;HARVARD MEDICAL SCHOOL;UNIVERSITY OF MIAMI;COLLEGE OF BEHAVIORAL AND COMMUNITY SCIENCES UNIVERSITY OF SOUTH FLORIDA;UNIVERSITY OF ROCHESTER MEDICAL CENTER	NOTREPORTED;UNIVERSITY OF MIAMI MILLER SCHOOL OF MEDICINE;NOTREPORTED	JIMENEZ DE, 2022, AM J GERIATR PSYCHIATRY	JIMENEZ DE, 2022, AM J GERIATR PSYCHIATRY
WAYKAR V;ESIWE C;ASGHAR Z;GUSSY M	none	SELF-HARM IS A PUBLIC HEALTH PROBLEM AND IS ASSOCIATED WITH HIGHER SUICIDAL INTENT AND GREATER SUICIDAL RISK IN OLDER ADULTS. THIS RETROSPECTIVE CROSS-SECTIONAL STUDY EXAMINES PSYCHOSOCIAL CHARACTERISTICS, SERVICE PROVISION AND OUTCOMES IN PATIENTS ATTENDING A MENTAL HEALTH LIAISON SERVICE (MHLS) WITH SELF-HARM ATTEMPT IN LINCOLNSHIRE. THE AUTHORS ALSO INVESTIGATE DEMOGRAPHIC, PSYCHIATRIC AND CLI…	LINCOLNSHIRE PARTNERSHIP NHS FOUNDATION TRUST, LINCOLN, UNITED KINGDOM; DATA SCIENCE AND EPIDEMIOLOGY, UNIVERSITY OF LINCOLN, LINCOLN, UNITED KINGDOM; RURAL HEALTH AND SOCIAL CARE, LINCOLN INTERNATIONAL INSTITUTE FOR RURAL HEALTH, UNIVERSITY OF LINCOLN, LINCOLN, UNITED KINGDOM		10.1002/pnp.12001	ARTICLE	ADULT; AGED; ARTICLE; AUTOMUTILATION; CONTROLLED STUDY; CROSS-SECTIONAL STUDY; DEPRESSION; EMERGENCY WARD; FEMALE; HEALTH CARE; HEALTH CARE FACILITY; HOSPITAL MORTALITY; HOSPITALIZATION; HUMAN; MAJOR CLINICAL STUDY; MALE; MENTAL DISEASE; MENTAL HEALTH; MENTAL HEALTH CARE; MENTAL HEALTH SERVICE; MORTALITY; POLYPHARMACY; PUBLIC HEALTH; PUBLIC HEALTH PROBLEM; RETROSPECTIVE STUDY; RISK ASSESSMENT; RI…	PROG NEUROL PSYCHIATRY	PROG. NEUROL. PSYCHIATRY	ENGLISH	JOHN WILEY AND SONS LTD	2024	V. WAYKAR; LINCOLNSHIRE PARTNERSHIP NHS FOUNDATION TRUST, LINCOLN, UNITED KINGDOM; EMAIL: VIJAYENDRA.WAYKAR@NHS.NET	13677543	PROGRESS IN NEUROLOGY AND PSYCHIATRY	0	OLDER ADULT SELFHARM A DESCRIPTIVE STUDY	28	ISI	LINCOLNSHIRE PARTNERSHIP NHS FOUNDATION TRUST;UNIVERSITY OF LINCOLN;UNIVERSITY OF LINCOLN	NOTREPORTED;LINCOLNSHIRE PARTNERSHIP NHS FOUNDATION TRUST;NOTREPORTED	WAYKAR V, 2024, PROG NEUROL PSYCHIATRY	WAYKAR V, 2024, PROG NEUROL PSYCHIATRY
HOOLEY C;SALVO D;BROWN D;BROOKMAN-FRAZEE L;LAU A;BROWNSON R;FOWLER P;INNES-GOMBERG D;PROCTOR E	none	PURPOSE: IN THE U.S., THE PERCENTAGE OF YOUTH IN NEED OF EVIDENCE-BASED MENTAL HEALTH PRACTICES (EBPS) WHO RECEIVE THEM (I.E., COVERAGE RATE) IS LOW. WE KNOW LITTLE ABOUT WHAT INFLUENCES COVERAGE RATES. IN 2010, THE LOS ANGELES COUNTY DEPARTMENT OF MENTAL HEALTH (LACDMH) LAUNCHED A REIMBURSEMENT-DRIVEN IMPLEMENTATION OF MULTIPLE EBPS IN YOUTH MENTAL HEALTH CARE. THIS STUDY EXAMINES TWO QUESTIONS:…	BRIGHAM YOUNG UNIVERSITY, PROVO, 84602, UT, UNITED STATES; BROWN SCHOOL, WASHINGTON UNIVERSITY IN ST. LOUIS, 1 BROOKINGS DRIVE, ST. LOUIS, 63130, MO, UNITED STATES; DEPARTMENT OF PSYCHIATRY, UNIVERSITY OF CALIFORNIA SAN DIEGO, 9500 GILMAN DRIVE #0812, LA JOLLA, 92093, CA, UNITED STATES; UCLA DEPARTMENT OF PSYCHOLOGY, 502 PORTOLA PLAZA, LOS ANGELES, 90095, CA, UNITED STATES; PREVENTION RESEARCH CE…	CHILDREN AND YOUTH; EVIDENCE-BASED PRACTICE; IMPLEMENTATION SCIENCE; MENTAL HEALTH; MENTAL HEALTH SERVICES; SCALE-UP	10.1007/s10488-022-01220-3	ARTICLE	ADOLESCENT; ADULT; AMBULATORY CARE FACILITIES; CHILD; EARLY INTERVENTION; EDUCATIONAL; HEALTH SERVICES NEEDS AND DEMAND; HUMANS; MENTAL HEALTH; MENTAL HEALTH SERVICES; ADULT; ARTICLE; CALIFORNIA; CHILD; CONTROLLED STUDY; EARLY INTERVENTION; ETHNIC GROUP; FEMALE; FOREIGNER; GEOGRAPHIC INFORMATION SYSTEM; HOUSEHOLD; HUMAN; HUMAN EXPERIMENT; IMPLEMENTATION SCIENCE; JUVENILE; LANGUAGE; MAJOR CLINICAL…	ADM POLICY MENT HEALTH MENT HEALTH SERV RES	ADM. POLICY MENT. HEALTH MENT. HEALTH SERV. RES.	ENGLISH	SPRINGER	2023	C. HOOLEY; BRIGHAM YOUNG UNIVERSITY, PROVO, 84602, UNITED STATES; EMAIL: COLE_HOOLEY@BYU.EDU	0894587X	ADMINISTRATION AND POLICY IN MENTAL HEALTH AND MENTAL HEALTH SERVICES RESEARCH	2	SCALINGUP CHILD AND YOUTH MENTAL HEALTH SERVICES ASSESSING COVERAGE OF A COUNTYWIDE PREVENTION AND EARLY INTERVENTION INITIATIVE DURING ONE FISCAL YEAR	50	ISI	BRIGHAM YOUNG UNIVERSITY;WASHINGTON UNIVERSITY IN ST. LOUIS;UNIVERSITY OF CALIFORNIA SAN DIEGO;WASHINGTON UNIVERSITY IN ST. LOUIS;LOS ANGELES COUNTY DEPARTMENT OF MENTAL HEALTH;THE UNIVERSITY OF TEXAS AT AUSTIN	NOTREPORTED;BRIGHAM YOUNG UNIVERSITY;NOTREPORTED	HOOLEY C, 2023, ADM POLICY MENT HEALTH MENT HEALTH SERV RES	HOOLEY C, 2023, ADM POLICY MENT HEALTH MENT HEALTH SERV RES
LANGHAM J;GUROL-URGANCI I;MULLER P;WEBSTER K;TASSIE E;HESLIN M;BYFORD S;KHALIL A;HARRIS T;SHARP H;PASUPATHY D;VAN D M J;HOWARD L;O'MAHEN H	none	BACKGROUND: PREGNANT WOMEN WITH PRE-EXISTING MENTAL ILLNESSES HAVE INCREASED RISKS OF ADVERSE OBSTETRIC AND NEONATAL OUTCOMES COMPARED WITH PREGNANT WOMEN WITHOUT PRE-EXISTING MENTAL ILLNESSES. WE AIMED TO ESTIMATE THESE DIFFERENCES IN RISKS ACCORDING TO THE HIGHEST LEVEL OF PRE-PREGNANCY SPECIALIST MENTAL HEALTH CARE, DEFINED AS PSYCHIATRIC HOSPITAL ADMISSION, CRISIS RESOLUTION TEAM (CRT) CONTAC…	DEPARTMENT OF HEALTH SERVICES RESEARCH & POLICY, LONDON SCHOOL OF HYGIENE & TROPICAL MEDICINE, LONDON, UNITED KINGDOM; ROYAL COLLEGE OF OBSTETRICIANS AND GYNAECOLOGISTS, LONDON, UNITED KINGDOM; KING'S HEALTH ECONOMICS, INSTITUTE OF PSYCHIATRY, PSYCHOLOGY & NEUROSCIENCE, KING'S COLLEGE LONDON, LONDON, UNITED KINGDOM; SECTION OF WOMEN'S MENTAL HEALTH, INSTITUTE OF PSYCHIATRY, PSYCHOLOGY & NEUROSCIE…		10.1016/S2215-0366(23)00200-6	ARTICLE	ADULT; COHORT STUDIES; FEMALE; HUMANS; INFANT; INFANT; NEWBORN; MENTAL HEALTH; PERINATAL DEATH; PREGNANCY; PREGNANCY OUTCOME; PREGNANT WOMEN; PREMATURE BIRTH; ROUTINELY COLLECTED HEALTH DATA; STATE MEDICINE; ADULT; ADVERSE OUTCOME; ARTICLE; ATTRIBUTABLE RISK; BIRTH WEIGHT; BLACK PERSON; CAUCASIAN; COHORT ANALYSIS; COMMUNITY CARE; CONTROLLED STUDY; ENGLAND; ETHNIC BACKGROUND; FEMALE; FETUS OUTCOME…	LANCET PSYCHIATRY	LANCET PSYCHIATRY	ENGLISH	ELSEVIER LTD	2023	J. VAN DER MEULEN; DEPARTMENT OF HEALTH SERVICES RESEARCH & POLICY, LONDON SCHOOL OF HYGIENE & TROPICAL MEDICINE, LONDON, WC1H 9SH, UNITED KINGDOM; EMAIL: JAN.VANDERMEULEN@LSHTM.AC.UK	22150366	THE LANCET PSYCHIATRY	10	OBSTETRIC AND NEONATAL OUTCOMES IN PREGNANT WOMEN WITH AND WITHOUT A HISTORY OF SPECIALIST MENTAL HEALTH CARE A NATIONAL POPULATIONBASED COHORT STUDY USING LINKED ROUTINELY COLLECTED DATA IN ENGLAND	10	ISI	LONDON SCHOOL OF HYGIENE AND TROPICAL MEDICINE;ROYAL COLLEGE OF OBSTETRICIANS AND GYNAECOLOGISTS;KING'S COLLEGE LONDON;KING'S COLLEGE LONDON;ST GEORGE'S UNIVERSITY HOSPITALS;ST GEORGE'S UNIVERSITY OF LONDON;DE MONTFORT UNIVERSITY;UNIVERSITY OF LIVERPOOL;KING'S COLLEGE LONDON;UNIVERSITY OF SYDNEY;UNIVERSITY OF EXETER	NOTREPORTED;LONDON SCHOOL OF HYGIENE AND TROPICAL MEDICINE;NOTREPORTED	LANGHAM J, 2023, LANCET PSYCHIATRY	LANGHAM J, 2023, LANCET PSYCHIATRY
ORTEGA A	none	THIS STUDY USES A DIFFERENCE-IN-DIFFERENCES DESIGN WITHIN AN EVENT-STUDY FRAMEWORK TO EXAMINE HOW STATE DECISIONS TO EXPAND MEDICAID FOLLOWING THE PASSAGE OF THE AFFORDABLE CARE ACT (ACA) AFFECTED MENTAL HEALTH TREATMENT. THE FINDINGS SUGGEST THAT EXPANSION STATES EXPERIENCED INCREASED ADMISSIONS TO MENTAL HEALTH TREATMENT FACILITIES AND MEDICAID-REIMBURSED PRESCRIPTIONS FOR MEDICATIONS USED TO T…	O?NEILL SCHOOL OF PUBLIC AND ENVIRONMENTAL AFFAIRS, INDIANA UNIVERSITY, BLOOMINGTON, IN, UNITED STATES	AFFORDABLE CARE ACT; ANXIETY; DEPRESSION; MEDICAID; MENTAL HEALTH TREATMENT; PUBLIC INSURANCE; SUICIDE	10.1002/hec.4633	ARTICLE	HEALTH SERVICES ACCESSIBILITY; HUMANS; INSURANCE COVERAGE; INSURANCE; HEALTH; MEDICAID; MENTAL HEALTH; PATIENT PROTECTION AND AFFORDABLE CARE ACT; SUICIDE; UNITED STATES; ADOLESCENT; ADULT; AMERICAN; ARTICLE; CHILD; CONDUCT DISORDER; DEPRESSION; FEMALE; HEALTH CARE ACCESS; HEALTH CARE POLICY; HEALTH INSURANCE; HOSPITAL ADMISSION; HUMAN; INFANT; LOWEST INCOME GROUP; MAJOR CLINICAL STUDY; MALE; MEN…	HEALTH ECON	HEALTH ECON.	ENGLISH	JOHN WILEY AND SONS LTD	2023	A. ORTEGA; O?NEILL SCHOOL OF PUBLIC AND ENVIRONMENTAL AFFAIRS, INDIANA UNIVERSITY, BLOOMINGTON, UNITED STATES; EMAIL: ALORTE@IU.EDU	10579230	HEALTH ECONOMICS (UNITED KINGDOM)	17	MEDICAID EXPANSION AND MENTAL HEALTH TREATMENT EVIDENCE FROM THE AFFORDABLE CARE ACT	32	ISI	INDIANA UNIVERSITY	NOTREPORTED;INDIANA UNIVERSITY;NOTREPORTED	ORTEGA A, 2023, HEALTH ECON	ORTEGA A, 2023, HEALTH ECON
SHISANA O;STEIN D;ZUNGU N;WOLVAARDT G	none	BACKGROUND: THE PUBLICATION OF SOUTH AFRICA'S NATIONAL MENTAL HEALTH POLICY FRAMEWORK AND STRATEGIC PLAN 2023?2030 AND THE PROPOSED NATIONAL HEALTH INSURANCE (NHI) MAKE IT TIMELY TO REVIEW THAT STATE OF MENTAL HEALTH SERVICES IN THE COUNTRY, AND TO EMPHASIZE THE IMPORTANCE OF PRIORITISING MENTAL HEALTH AS A PIVOTAL COMPONENT OF HOLISTIC HEALTHCARE. METHOD: WE SEARCHED THE PUBLISHED LITERATURE ON …	DEPARTMENT OF PSYCHIATRY AND MENTAL HEALTH, UNIVERSITY OF CAPE TOWN, CAPE TOWN, SOUTH AFRICA; SAMRC UNIT ON RISK & RESILIENCE IN MENTAL DISORDERS, NEUROSCIENCE INSTITUTE, UNIVERSITY OF CAPE TOWN, CAPE TOWN, SOUTH AFRICA; PUBLIC HEALTH, SOCIETIES AND BELONGING DIVISION, HUMAN SCIENCES RESEARCH COUNCIL, PRETORIA, SOUTH AFRICA; SCHOOL OF NURSING AND PUBLIC HEALTH, UNIVERSITY OF KWAZULU NATAL, DURBAN…	MENTAL DISORDERS; MENTAL HEALTH FINANCING; MENTAL HEALTH PERSONNEL; MENTAL HEALTH POLICY	10.1016/j.comppsych.2024.152458	ARTICLE	COVID-19; HEALTH STATUS; HUMANS; MENTAL HEALTH; MENTAL HEALTH SERVICES; PANDEMICS; SOUTH AFRICA; ANXIETY DISORDER; ARTICLE; CORONAVIRUS DISEASE 2019; DEPRESSION; FINANCIAL MANAGEMENT; FUNDING; GREY LITERATURE; HEALTH CARE AVAILABILITY; HEALTH CARE FACILITY; HEALTH CARE PLANNING; HEALTH CARE POLICY; HEALTH ECONOMICS; HUMAN; MEDICAL LITERATURE; MEDLINE; MENTAL DISEASE; MENTAL HEALTH CARE; MENTAL HE…	COMPR PSYCHIATRY	COMPR. PSYCHIATRY	ENGLISH	W.B. SAUNDERS	2024	O. SHISANA; DEPARTMENT OF PSYCHIATRY AND MENTAL HEALTH, UNIVERSITY OF CAPE TOWN, CAPE TOWN, SOUTH AFRICA; EMAIL: OSHISANA@EVIDENCEBSOL.COM	0010440X	COMPREHENSIVE PSYCHIATRY	8	THE RATIONALE FOR SOUTH AFRICA TO PRIORITISE MENTAL HEALTH CARE AS A CRITICAL ASPECT OF OVERALL HEALTH CARE	130	ISI	UNIVERSITY OF CAPE TOWN;UNIVERSITY OF CAPE TOWN;HUMAN SCIENCES RESEARCH COUNCIL;UNIVERSITY OF KWAZULU NATAL;FOUNDATION FOR PROFESSIONAL DEVELOPMENT	NOTREPORTED;UNIVERSITY OF CAPE TOWN;NOTREPORTED	SHISANA O, 2024, COMPR PSYCHIATRY	SHISANA O, 2024, COMPR PSYCHIATRY
JACKSON K;KANER E;HANRATTY B;GILVARRY E;YARDLEY L;O'DONNELL A	none	BACKGROUND AND AIMS: HEAVY ALCOHOL USE AND DEPRESSION COMMONLY CO-OCCUR. HOWEVER, HEALTH AND SOCIAL CARE SERVICES RARELY PROVIDE COORDINATED SUPPORT FOR THESE CONDITIONS. USING RELATIONAL AUTONOMY, WHICH RECOGNIZES HOW SOCIAL AND ECONOMIC CONTEXTS AND RELATIONAL SUPPORT ALTER PEOPLE'S CAPACITY FOR AGENCY, THIS STUDY AIMED TO (1) EXPLORE HOW PEOPLE EXPERIENCE FORMAL CARE PROVISION FOR CO-OCCURRING…	POPULATION HEALTH SCIENCES INSTITUTE, NEWCASTLE UNIVERSITY, NEWCASTLE UPON TYNE, UNITED KINGDOM; SCHOOL OF PSYCHOLOGICAL SCIENCE, UNIVERSITY OF BRISTOL, BRISTOL, UNITED KINGDOM; SCHOOL OF PSYCHOLOGY, UNIVERSITY OF SOUTHAMPTON, SOUTHAMPTON, UNITED KINGDOM	ALCOHOL; CO-OCCURRING DISORDERS; HEALTH INEQUALITIES; MENTAL HEALTH; QUALITATIVE RESEARCH; SOCIAL CONTEXT	10.1111/add.16350	ARTICLE	ALCOHOLISM; DEPRESSION; FEMALE; HUMANS; MALE; QUALITATIVE RESEARCH; RELATIONAL AUTONOMY; SOCIAL SUPPORT; ALCOHOLISM; DEPRESSION; FEMALE; HUMAN; MALE; QUALITATIVE RESEARCH; RELATIONAL AUTONOMY; SOCIAL SUPPORT	ADDICTION	ADDICTION	ENGLISH	JOHN WILEY AND SONS INC	2024	A. O'DONNELL; POPULATION HEALTH SCIENCES INSTITUTE, NEWCASTLE UNIVERSITY, NEWCASTLE UPON TYNE, UNITED KINGDOM; EMAIL: AMY.DONNELL@NEWCASTLE.AC.UK	9652140	ADDICTION	0	UNDERSTANDING PEOPLES EXPERIENCES OF THE FORMAL HEALTH AND SOCIAL CARE SYSTEM FOR COOCCURRING HEAVY ALCOHOL USE AND DEPRESSION THROUGH THE LENS OF RELATIONAL AUTONOMY A QUALITATIVE STUDY	119	ISI	NEWCASTLE UNIVERSITY;UNIVERSITY OF BRISTOL;UNIVERSITY OF SOUTHAMPTON	NOTREPORTED;NEWCASTLE UNIVERSITY;NOTREPORTED	JACKSON K, 2024, ADDICTION	JACKSON K, 2024, ADDICTION
ZECHMEISTER-KOSS I;STROHMAIER C;HÂ™LZLE L;BAUER A;GOODYEAR M;CHRISTIANSEN H;PAUL J	none	OBJECTIVES: THE NATURE OF ADVERSE EFFECTS OF PARENTAL MENTAL HEALTH PROBLEMS AND OF THE INTERVENTIONS TO ADDRESS THEM MAY REQUIRE SPECIFIC DESIGNS OF ECONOMIC EVALUATION STUDIES. NEVERTHELESS, METHODOLOGICAL GUIDANCE IS LACKING. WE AIM TO UNDERSTAND THE BROAD SPECTRUM OF ADVERSE EFFECTS FROM PARENTAL MENTAL HEALTH PROBLEMS IN CHILDREN AND THE ECONOMIC CONSEQUENCES ON AN INDIVIDUAL AND SOCIETAL LE…	AUSTRIAN INSTITUTE FOR HEALTH TECHNOLOGY ASSESSMENT GMBH, VIENNA, AUSTRIA; VILLAGE RESEARCH GROUP, MEDICAL UNIVERSITY INNSBRUCK, INNSBRUCK, AUSTRIA; LONDON SCHOOL OF ECONOMICS, CARE POLICY AND EVALUATION CENTRE (CPEC), LONDON, UNITED KINGDOM; MONASH UNIVERSITY AUSTRALIA, SCHOOL OF RURAL HEALTH, MELBOURNE, VIC, AUSTRALIA; PHILIPPS-UNIVERSITY MARBURG, FACHBEREICH PSYCHOLOGIE, MARBURG, GERMANY	CHILD OUTCOME MEASURES; ECONOMIC EVALUATION; PARENTAL MENTAL ILLNESS	10.1016/j.jval.2022.11.016	ARTICLE	ADULT; CHILD; COST-BENEFIT ANALYSIS; HUMANS; MENTAL DISORDERS; MENTAL HEALTH; PARENTS; QUALITY OF LIFE; ADVERSE EVENT; ARTICLE; CRIMINAL JUSTICE; ECONOMIC EVALUATION; FAMILY THERAPY; HEALTH CARE COST; HEALTH EDUCATION; HEALTH PROGRAM; HUMAN; MENTAL DISEASE; MENTAL HEALTH; PARENT; PHYSICAL PERFORMANCE; PUBLIC SECTOR; SOCIAL CARE; SOCIAL ENVIRONMENT; SOCIAL INTERACTION; SOCIOECONOMICS; ADULT; CHILD…	VALUE HEALTH	VALUE HEALTH	ENGLISH	ELSEVIER LTD	2023	I. ZECHMEISTER-KOSS; AUSTRIAN INSTITUTE FOR HEALTH TECHNOLOGY ASSESSMENT, GARNISONGASSE 7/20, VIENNA, 1090, AUSTRIA; EMAIL: INGRID.ZECHMEISTER@AIHTA.AT	10983015	VALUE IN HEALTH	3	ECONOMIC EVALUATION OF FAMILYFOCUSED PROGRAMS WHEN PARENTS HAVE A MENTAL HEALTH PROBLEM METHODOLOGICAL CONSIDERATIONS	26	ISI	AUSTRIAN INSTITUTE FOR HEALTH TECHNOLOGY ASSESSMENT GMBH;MEDICAL UNIVERSITY INNSBRUCK;LONDON SCHOOL OF ECONOMICS;MONASH UNIVERSITY AUSTRALIA;PHILIPPS-UNIVERSITY MARBURG	NOTREPORTED;AUSTRIAN INSTITUTE FOR HEALTH TECHNOLOGY ASSESSMENT;NOTREPORTED	ZECHMEISTER-KOSS I, 2023, VALUE HEALTH	ZECHMEISTER-KOSS I, 2023, VALUE HEALTH
MMANGA C;NDASAUKA Y;KAINJA J;KONDOWE F;MCHENGA M;MALIWICHI L;NYAMALI S	none	INTRODUCTION: THIS PAPER ASSESSED THE EFFECTS OF COVID-19 ON ADOLESCENT MENTAL HEALTH IN MALAWI. THERE IS MINIMAL RESEARCH ON ADOLESCENT MENTAL HEALTH IN AFRICA, MALAWI IN PARTICULAR. THE STUDY SHOWS A LINK BETWEEN THE PANDEMIC AND MENTAL HEALTH. SOME FACTORS THAT MAY HAVE CONTRIBUTED TO THIS LINK INCLUDE; COVID-19 PREVENTIVE MEASURES, MEDIA EXPOSURE AND THE INCREASE IN UNEMPLOYMENT. METHODS: THE…	KAMUZU COLLEGE OF NURSING, UNIVERSITY OF MALAWI, ZOMBA, MALAWI; DEPARTMENT OF PHILOSOPHY, UNIVERSITY OF MALAWI, ZOMBA, MALAWI; DEPARTMENT OF MEDIA AND COMMUNICATION STUDIES, UNIVERSITY OF CAPE TOWN, CAPE TOWN, SOUTH AFRICA; DEPARTMENT OF MATHEMATICAL SCIENCES, UNIVERSITY OF EAST ANGLIA, NORWICH, UNITED KINGDOM	ADOLESCENTS; ANXIETY; COVID-19; DEPRESSION; MALAWI; MENTAL HEALTH	10.3389/fpsyt.2022.1024793	ARTICLE	ADOLESCENT; ADULT; ANXIETY; ARTICLE; CHI SQUARE TEST; CLINICAL OUTCOME; COMMUNITY; CONTROLLED STUDY; COPING BEHAVIOR; CORONAVIRUS DISEASE 2019; DEPRESSION; FEAR; FEMALE; FINANCIAL MANAGEMENT; GENDER; HUMAN; HUMAN RELATION; MAJOR CLINICAL STUDY; MALAWI; MALE; MENTAL HEALTH; MENTAL STRESS; PANDEMIC; POSTTRAUMATIC STRESS DISORDER; PRIMARY EDUCATION; PRODUCTIVITY; QUALITATIVE ANALYSIS; QUANTITATIVE A…	FRONT PSYCHIATRY	FRONT. PSYCHIATRY	ENGLISH	FRONTIERS MEDIA S.A.	2023	C. MMANGA; KAMUZU COLLEGE OF NURSING, UNIVERSITY OF MALAWI, ZOMBA, MALAWI; EMAIL: CMMANGA@KUHES.AC.MW; Y. NDASAUKA; DEPARTMENT OF PHILOSOPHY, UNIVERSITY OF MALAWI, ZOMBA, MALAWI; EMAIL: YNDASAUKA@UNIMA.AC.MW	16640640	FRONTIERS IN PSYCHIATRY	7	THE WORLD IS COMING TO AN END COVID19 DEPRESSION AND ANXIETY AMONG ADOLESCENTS IN MALAWI	13	ISI	UNIVERSITY OF MALAWI;UNIVERSITY OF MALAWI;UNIVERSITY OF CAPE TOWN;UNIVERSITY OF EAST ANGLIA	NOTREPORTED;UNIVERSITY OF MALAWI;NOTREPORTED;NOTREPORTED;UNIVERSITY OF MALAWI;NOTREPORTED	MMANGA C, 2023, FRONT PSYCHIATRY	MMANGA C, 2023, FRONT PSYCHIATRY
LAM P;SIMPSON D;JOHN D;RODRIGUEZ M;BRIDGMAN-PACKER D;CRUZ A;O'NEILL M;LEWIS-FERN?NDEZ R	none	OBJECTIVE: RESEARCH ON MENTAL HEALTH INTERVENTIONS, LARGELY FROM OBSERVATIONAL STUDIES, SUGGESTS THAT INDIVIDUALS WHO ARE BLACK, INDIGENOUS, AND PEOPLE OF COLOR (BIPOC) HAVE LOWER TREATMENT ENGAGEMENT THAN NON-LATINO WHITES. THIS SYSTEMATIC REVIEW FOCUSES ON PROSPECTIVE, EXPERIMENTAL TREATMENT TRIALS, WHICH REDUCE VARIABILITY IN PATIENT AND INTERVENTION CHARACTERISTICS AND SOME ACCESS BARRIERS (E…	NEW YORK STATE CENTER OF EXCELLENCE FOR CULTURAL COMPETENCE, NEW YORK STATE PSYCHIATRIC INSTITUTE, NEW YORK, NY, UNITED STATES; DEPARTMENT OF PSYCHIATRY, HOSPITAL OF THE UNIVERSITY OF PENNSYLVANIA, PERELMAN SCHOOL OF MEDICINE, PHILADELPHIA, PA, UNITED STATES; DEPARTMENT OF PSYCHOLOGY, UNIVERSITY OF MICHIGAN, ANN ARBOR, MI, UNITED STATES; SOUTHCENTRAL FOUNDATION, ANCHORAGE, AK, UNITED STATES; DEPA…		10.4088/JCP.21r14343	ARTICLE	ADULT; ETHNICITY; HUMANS; MENTAL DISORDERS; MENTAL HEALTH; PROSPECTIVE STUDIES; PSYCHOTHERAPY; AMFEBUTAMONE; BUPRENORPHINE; CITALOPRAM; CLONIDINE; COCAINE; FLUOXETINE; METHYLPHENIDATE; NALOXONE; NALTREXONE; SERTRALINE; VARENICLINE; ARTICLE; BIPOLAR DISORDER; COCAINE DEPENDENCE; DISEASE SEVERITY; EATING DISORDER; EXPERIMENTAL THERAPY; EXPOSURE THERAPY; HEALTH CARE DISPARITY; HUMAN; INSOMNIA; MENTA…	J CLIN PSYCHIATRY	J. CLIN. PSYCHIATRY	ENGLISH	PHYSICIANS POSTGRADUATE PRESS INC.	2022	P.C. LAM; NEW YORK, 1051 RIVERSIDE DR, 10032, UNITED STATES; EMAIL: PETER.LAM@NYSPI.COLUMBIA.EDU	1606689	JOURNAL OF CLINICAL PSYCHIATRY	6	DIFFERENTIAL ENGAGEMENT BY RACEETHNICITY IN EXPERIMENTAL TRIALS OF MENTAL HEALTH TREATMENT INTERVENTIONS A SYSTEMATIC REVIEW	83	ISI	NEW YORK STATE PSYCHIATRIC INSTITUTE;HOSPITAL OF THE UNIVERSITY OF PENNSYLVANIA;UNIVERSITY OF MICHIGAN;SOUTHCENTRAL FOUNDATION;CLARK UNIVERSITY;COLUMBIA UNIVERSITY;COLUMBIA UNIVERSITY	NOTREPORTED;NOTREPORTED;NOTREPORTED	LAM PC, 2022, J CLIN PSYCHIATRY	LAM PC, 2022, J CLIN PSYCHIATRY
WALDMANN T;SCHAIBLE J;STIAWA M;BECKER T;WEGSCHEIDER K;ADEMA B;WIEGAND-GREFE S;KILIAN R	none	BACKGROUND: CHILDREN OF FAMILIES WITH A PARENT WITH A MENTAL ILLNESS HAVE AN INCREASED RISK OF DEVELOPING SOCIAL AND MENTAL HEALTH PROBLEMS RESULTING IN DECREASED QUALITY OF LIFE. THEREFORE, CHILDREN AND ADOLESCENTS LIVING IN FAMILIES WITH A PARENT WITH MENTAL ILLNESS ARE REGARDED AS A TARGET GROUP FOR PREVENTIVE INTERVENTIONS. TO DATE, ONLY A FEW ECONOMIC EVALUATION STUDIES FOR INTERVENTIONS DIR…	DEPARTMENT OF PSYCHIATRY AND PSYCHOTHERAPY AT BKH GÂšNZBURG II, ULM UNIVERSITY, LINDENALLEE 2, GÂšNZBURG, 89312, GERMANY; INSTITUTE FOR MEDICAL BIOMETRY AND EPIDEMIOLOGY, UNIVERSITY MEDICAL CENTER HAMBURG EPPENDORF, HAMBURG, GERMANY; DEPARTMENT FOR PSYCHIATRY AND PSYCHOTHERAPY, UNIVERSITY MEDICAL CENTER HAMBURG EPPENDORF, HAMBURG, GERMANY; ABTEILUNG FÂšR PSYCHIATRIE UND PSYCHOTHERAPIE DES KINDES-…	ADOLESCENTS; CHILDREN; COST-UTILITY; HEALTH ECONOMIC EVALUATION; PARENT WITH MENTAL ILLNESS WITH MENTAL ILLNESS; SELECTIVE PREVENTION	10.1186/s13034-023-00693-w	ARTICLE	ARTICLE; CHILD; CONTROLLED STUDY; COST BENEFIT ANALYSIS; COST OF ILLNESS; COST UTILITY ANALYSIS; ECONOMIC EVALUATION; FEMALE; GERMANY; HUMAN; MAJOR CLINICAL STUDY; MALE; MENTAL DISEASE; PSYCHOSOCIAL CARE; QUALITY ADJUSTED LIFE YEAR; RANDOMIZED CONTROLLED TRIAL; RETROSPECTIVE STUDY; STOCHASTIC MODEL	CHILD ADOLESC PSYCHIATRY MENT HEALTH	CHILD ADOLESC. PSYCHIATRY MENT. HEALTH	ENGLISH	BIOMED CENTRAL LTD	2023	R. KILIAN; DEPARTMENT OF PSYCHIATRY AND PSYCHOTHERAPY AT BKH GÂšNZBURG II, ULM UNIVERSITY, GÂšNZBURG, LINDENALLEE 2, 89312, GERMANY; EMAIL: REINHOLD.KILIAN@UNI-ULM.DE	17532000	CHILD AND ADOLESCENT PSYCHIATRY AND MENTAL HEALTH	0	THE COSTUTILITY OF AN INTERVENTION FOR CHILDREN AND ADOLESCENTS WITH A PARENT HAVING A MENTAL ILLNESS IN THE FRAMEWORK OF THE GERMAN HEALTH AND SOCIAL CARE SYSTEM A HEALTH ECONOMIC EVALUATION OF A RANDOMIZED CONTROLLED TRIAL	17	ISI	ULM UNIVERSITY;UNIVERSITY MEDICAL CENTER HAMBURG EPPENDORF;UNIVERSITY MEDICAL CENTER HAMBURG EPPENDORF;UNIVERSITÂŽTSKLINIKUM LEIPZIG	NOTREPORTED;ULM UNIVERSITY;NOTREPORTED	WALDMANN T, 2023, CHILD ADOLESC PSYCHIATRY MENT HEALTH	WALDMANN T, 2023, CHILD ADOLESC PSYCHIATRY MENT HEALTH
DURMU? V	none	YOUNG PEOPLE?S MENTAL AND SUBSTANCE USE DISORDERS ARE A SIGNIFICANT PUBLIC HEALTH ISSUE WORLDWIDE. A LARGE PROPORTION OF THE WORLD?S DISEASE BURDEN AMONG YOUNG PEOPLE IS ATTRIBUTABLE TO MENTAL HEALTH DISORDERS. THIS STUDY EXAMINES THE PREVALENCE OF MENTAL AND SUBSTANCE USE DISORDERS, THE INCIDENCE OF SELF-HARM BEHAVIORS, YEARS LIVED WITH DISABILITY, AND YEARS OF LIFE LOST BY COUNTRY-LEVEL INCOME …	DEPARTMENT OF HEALTHCARE MANAGEMENT, KÂšTAHYA HEALTH SCIENCES UNIVERSITY, KÂšTAHYA, TURKEY	MENTAL HEALTH; MENTAL HEALTH DISORDERS; SELF-HARM; SUBSTANCE USE DISORDERS; YOUNG PEOPLE	10.1007/s10826-024-02899-8	ARTICLE		J CHILD FAM STUD	J. CHILD FAM. STUD.	ENGLISH	SPRINGER	2024	V. DURMU?; DEPARTMENT OF HEALTHCARE MANAGEMENT, KÂšTAHYA HEALTH SCIENCES UNIVERSITY, KÂšTAHYA, TURKEY; EMAIL: VELIDURMUS@GMAIL.COM	10621024	JOURNAL OF CHILD AND FAMILY STUDIES	0	ANALYSIS OF MENTAL HEALTH AND SUBSTANCE USE DISORDERS AND SELFHARM AMONG YOUNG PEOPLE IN 185 COUNTRIES	33	ISI	KÂšTAHYA HEALTH SCIENCES UNIVERSITY	NOTREPORTED;KÂšTAHYA HEALTH SCIENCES UNIVERSITY;NOTREPORTED	DURMU? V, 2024, J CHILD FAM STUD	DURMU? V, 2024, J CHILD FAM STUD
ARPIN E;DE O C;SIDDIQI A;LAPORTE A	none	THE OBJECTIVE OF THIS STUDY WAS TO INVESTIGATE THE RELATIONSHIP BETWEEN HEALTH CONDITIONS IN CHILDHOOD (AGES 4?11), AND HEALTH AND SOCIOECONOMIC OUTCOMES IN ADULTHOOD (AGES 21?33). THIS STUDY TAKES ADVANTAGE OF A NEW LINKAGE BETWEEN THE NATIONAL LONGITUDINAL SURVEY OF CHILDREN AND YOUTH (NLSCY) AND ADMINISTRATIVE TAX DATA FROM THE T1 FAMILY FILE (T1FF) FROM STATISTICS CANADA. THE NLSCY INCLUDES R…	INSTITUTE OF HEALTH POLICY, MANAGEMENT AND EVALUATION, UNIVERSITY OF TORONTO, 155 COLLEGE ST 4TH FLOOR, TORONTO, M5T 3M6, ON, CANADA; CANADIAN CENTER FOR HEALTH ECONOMICS, UNIVERSITY OF TORONTO, 155 COLLEGE ST 4TH FLOOR, TORONTO, M5T 3M6, ON, CANADA; CENTRE FOR HEALTH ECONOMICS AND HULL YORK MEDICAL SCHOOL, UNIVERSITY OF YORK, YORK, HESLINGTON, YO10 5DD, UNITED KINGDOM; INSTITUTE FOR MENTAL HEALT…	CANADA; CHILD HEALTH; DATA LINKAGE; LONG-RUN EFFECTS; MENTAL/DEVELOPMENTAL HEALTH	10.1016/j.ehb.2023.101257	ARTICLE	ADOLESCENT; ADULT; CANADA; CHILD; CHRONIC DISEASE; HUMANS; LONGITUDINAL STUDIES; MENTAL DISORDERS; MENTAL HEALTH; ADULT; ADULTHOOD; ARTICLE; BIRTH WEIGHT; CANADA; CHILD; CHILD HEALTH; CHILDHOOD; CHRONIC DISEASE; CLINICAL OUTCOME; CONTROLLED STUDY; DECOMPOSITION; FEMALE; HOUSEHOLD INCOME; HUMAN; INFANT; INVESTMENT; MALE; MATHEMATICS; NEWBORN; POLICY; SKILL; SOCIOECONOMICS; TAX; ADOLESCENT; CHRONIC…	ECON HUM BIOL	ECON. HUM. BIOL.	ENGLISH	ELSEVIER B.V.	2023	E. ARPIN; TORONTO, 155 COLLEGE ST 4TH FLOOR, M5T 3M6; EMAIL: EMMANUELLE.ARPIN@MAIL.UTORONTO.CA	1570677X	ECONOMICS AND HUMAN BIOLOGY	1	THE LONGARM OF CHRONIC CONDITIONS IN CHILDHOOD EVIDENCE FROM CANADA USING LINKED SURVEYADMINISTRATIVE DATA	50	ISI	UNIVERSITY OF TORONTO;UNIVERSITY OF TORONTO;UNIVERSITY OF YORK;INSTITUTE FOR MENTAL HEALTH POLICY RESEARCH;UNIVERSITY OF TORONTO;UNIVERSITY OF NORTH CAROLINA ? CHAPEL HILL	NOTREPORTED;NOTDECLARED;NOTREPORTED	ARPIN E, 2023, ECON HUM BIOL	ARPIN E, 2023, ECON HUM BIOL
RAMASWAMY C;REVANTH R;JAGADEESH R;SAMPATH T;FLOWER F	none	GLOBALLY, 1 IN 4 PERSONS HAVE MENTAL HEALTH ISSUES AT SOME POINT IN LIFE. HOWEVER, THE MENTAL HEALTH SERVICES ARE NOT EASILY AVAILABLE, ACCESSIBLE AND AFFORDABLE TO ALL STRATA OF THE SOCIETY WITH VARYING SOCIO-ECONOMIC AND CULTURAL BACKGROUNDS. IN HEALTHCARE SETTINGS, SOCIAL WORKERS WORK IN A CONTEXT WHERE A GREATER NUMBER OF OTHER PROFESSIONALS OFTEN HAVE MEDICAL EXPERTISE RATHER THAN SOCIAL SCI…	BHARATHIAR UNIVERSITY, INDIA	CULTURAL SENSITIVITY; HEALTH EQUITY; HEALTH SOCIAL WORKERS; MARGINALIZED IDENTITIES; MENTAL HEALTH; MENTAL HEALTH EQUITY		ARTICLE		SOC WORK SOC	SOC. WORK SOC.	ENGLISH	UNIVERSITY OF DUISBURG	2024		16138953	SOCIAL WORK AND SOCIETY	0	HEALTH SOCIAL WORKERS IN PROMOTING MENTAL HEALTH EQUITY VOICE AND AGENCY FOR THE MARGINALIZED	22	ISI	BHARATHIAR UNIVERSITY	BHARATHIAR UNIVERSITY	RAMASWAMY C, 2024, SOC WORK SOC	RAMASWAMY C, 2024, SOC WORK SOC
ESCOVAR E;BOCANEGRA E;CRASKE M;BYSTRITSKY A;ROY-BYRNE P;SHERBOURNE C;STEIN M;CHAVIRA D	none	DISPARITIES IN TREATMENT ENGAGEMENT AND ADHERENCE BASED ON ETHNICITY HAVE BEEN WIDELY RECOGNIZED BUT ARE INADEQUATELY UNDERSTOOD. FEW STUDIES HAVE EXAMINED TREATMENT DROPOUT AMONG LATINX AND NON-LATINX WHITE (NLW) INDIVIDUALS. USING ANDERSEN'S BEHAVIORAL MODEL OF HEALTH SERVICE USE (A BEHAVIORAL MODEL OF FAMILIES' USE OF HEALTH SERVICES. 1968; J HEALTH SOC BEHAV. 1995; 36:1-10) AS A FRAMEWORK, WE…	DEPARTMENT OF PSYCHOLOGY, UNIVERSITY OF CALIFORNIA, LOS ANGELES, LOS ANGELES, CA, UNITED STATES; DEPARTMENT OF PSYCHIATRY AND BIOBEHAVIORAL SCIENCES, UNIVERSITY OF CALIFORNIA, LOS ANGELES, LOS ANGELES, CA, UNITED STATES; CTR. FOR HEALTHCARE IMPROVEMENT FOR ADDICTIONS, MENTAL ILLNESS, AND MEDICALLY VULNERABLE POPULATIONS, UNIVERSITY OF WASHINGTON, HARBORVIEW MEDICAL CENTER, SEATTLE, WA, UNITED STA…	ANXIETY; DROPOUT; ENGAGEMENT; LATINX; TREATMENT	10.1097/NMD.0000000000001533	ARTICLE	ANXIETY DISORDERS; ETHNICITY; HISPANIC OR LATINO; HUMANS; PATIENT DROPOUTS; PRIMARY HEALTH CARE; ADULT; ANXIETY DISORDER; ARTICLE; CAUCASIAN; COGNITIVE BEHAVIORAL THERAPY; COGNITIVE RESTRUCTURING; CONTROLLED STUDY; ETHNIC DIFFERENCE; FEMALE; HEALTH CARE UTILIZATION; HISPANIC; HUMAN; MAJOR CLINICAL STUDY; MALE; MEDIATION ANALYSIS; PATIENT DROPOUT; PRIMARY MEDICAL CARE; PSYCHOLOGICAL MODEL; RANDOMI…	J NERV MENT DIS	J. NERV. MENT. DIS.	ENGLISH	WOLTERS KLUWER HEALTH	2023	E.L. ESCOVAR; DEPARTMENT OF PSYCHOLOGY, UNIVERSITY OF CALIFORNIA LOS ANGELES, LOS ANGELES, 502 PORTOLA PLAZA, 90095, UNITED STATES; EMAIL: EMILYESCOVAR@UCLA.EDU	223018	JOURNAL OF NERVOUS AND MENTAL DISEASE	1	MEDIATORS OF ETHNIC DIFFERENCES IN DROPOUT RATES FROM A RANDOMIZED CONTROLLED TREATMENT TRIAL AMONG LATINX AND NONLATINX WHITE PRIMARY CARE PATIENTS WITH ANXIETY DISORDERS	211	ISI	UNIVERSITY OF CALIFORNIA;UNIVERSITY OF CALIFORNIA;UNIVERSITY OF WASHINGTON;UNIVERSITY OF CALIFORNIA	NOTREPORTED;UNIVERSITY OF CALIFORNIA LOS ANGELES;NOTREPORTED	ESCOVAR EL, 2023, J NERV MENT DIS	ESCOVAR EL, 2023, J NERV MENT DIS
RILEY K;HUPCEY J	none	VARIOUS FACTORS IMPACT END-OF-LIFE (EOL) FOR OLDER ADULTS. THIS PERIOD IS MORE COMPLEX FOR OLDER ADULTS WITH SEVERE AND PERSISTENT MENTAL ILLNESS (SPMI). THE CURRENT ARTICLE AIMS TO EXPLORE A NON-EXHAUSTIVE LIST OF PERSON-LEVEL AND ENVIRONMENTAL FACTORS THAT MAY IMPACT EOL FOR OLDER ADULTS WITH SPMI. ? 2022 SLACK INCORPORATED. ALL RIGHTS RESERVED.	PENN STATE UNIVERSITY, UNIVERSITY PARK, PA, UNITED STATES		10.3928/00989134-20220210-04	ARTICLE	AGED; CHRONIC DISEASE; HOSPICE CARE; HUMANS; MENTAL DISORDERS; PATIENT-CENTERED CARE; TERMINAL CARE; AGED; CHRONIC DISEASE; HOSPICE CARE; HUMAN; MENTAL DISEASE; PATIENT CARE; TERMINAL CARE	J GERONTOL NURS	J. GERONTOL. NURS.	ENGLISH	SLACK INCORPORATED	2022	K. RILEY; PENN STATE UNIVERSITY, UNIVERSITY PARK, UNITED STATES; EMAIL: KIERNANRILEY4@GMAIL.COM	989134	JOURNAL OF GERONTOLOGICAL NURSING	0	PERSONCENTERED CARE CONSIDERATIONS FOR ENDOFLIFE CARE TO PERSONS WITH SEVERE AND PERSISTENT MENTAL ILLNESS	48	ISI	PENN STATE UNIVERSITY	NOTREPORTED;PENN STATE UNIVERSITY;NOTREPORTED	RILEY K, 2022, J GERONTOL NURS	RILEY K, 2022, J GERONTOL NURS
MASRI R;CHAAR S;ELIAS J;MEKSASSI B;ALI R;ROBERTS B;BROWN F;ASMAR M;MCKEE M;CHAMMAY R;SINGH N	none	FORCIBLY DISPLACED POPULATIONS EXPERIENCE AN INCREASED BURDEN OF MENTAL ILLNESS. SCALING UP MENTAL HEALTH (MH) SERVICES PLACES NEW RESOURCE DEMANDS ON HEALTH SYSTEMS IN CRISES-AFFECTED SETTINGS AND RAISES QUESTIONS ABOUT HOW TO PROVIDE EQUITABLE MH SERVICES FOR REFUGEE AND HOST POPULATIONS. OUR STUDY INVESTIGATES BARRIERS, FACILITATORS, AND PROPOSED SOLUTIONS TO MH FINANCING AND ACCESS FOR LEBANE…	RESEARCH AND DEVELOPMENT DEPARTMENT, WAR CHILD HOLLAND, BEIRUT, LEBANON; FACULTY OF PUBLIC HEALTH AND POLICY, LONDON SCHOOL OF HYGIENE AND TROPICAL MEDICINE, LONDON, UNITED KINGDOM; HIGHER INSTITUTE OF PUBLIC HEALTH (ISSP), SAINT JOSEPH UNIVERSITY OF BEIRUT, BEIRUT, LEBANON; DEPARTMENT OF PSYCHIATRY, FACULTY OF MEDICINE, SAINT JOSEPH UNIVERSITY, BEIRUT, LEBANON; NATIONAL MENTAL HEALTH PROGRAMME, …		10.1371/journal.pgph.0003318	ARTICLE		PLOS GLOB PUBLIC HEALTH	PLOS. GLOB. PUBLIC HEALTH.	ENGLISH	PUBLIC LIBRARY OF SCIENCE	2024	N.S. SINGH; FACULTY OF PUBLIC HEALTH AND POLICY, LONDON SCHOOL OF HYGIENE AND TROPICAL MEDICINE, LONDON, UNITED KINGDOM; EMAIL: NEHA.SINGH@LSHTM.AC.UK	27673375	PLOS GLOBAL PUBLIC HEALTH	0	BARRIERS FACILITATORS AND PROPOSED SOLUTIONS TO EQUITABLE MENTAL HEALTH FINANCING AND SERVICE DELIVERY FOR THE LEBANESE POPULATIONS AND DISPLACED SYRIANS IN LEBANON FINDINGS FROM A QUALITATIVE STUDY	4	ISI	RESEARCH AND DEVELOPMENT DEPARTMENT;LONDON SCHOOL OF HYGIENE AND TROPICAL MEDICINE;SAINT JOSEPH UNIVERSITY OF BEIRUT;SAINT JOSEPH UNIVERSITY;NATIONAL MENTAL HEALTH PROGRAMME	NOTREPORTED;LONDON SCHOOL OF HYGIENE AND TROPICAL MEDICINE;NOTREPORTED	MASRI RE, 2024, PLOS GLOB PUBLIC HEALTH	MASRI RE, 2024, PLOS GLOB PUBLIC HEALTH
HAN S;SUN T;SUN Y;GAO X	none	PURPOSE: THE COVID-19 OUTBREAK HAS BEEN EFFECTIVELY CONTROLLED IN CHINA, BUT THE RESULTING PUBLIC PSYCHOLOGICAL CRISIS IS A LATENT, PERSISTENT AND TORTUROUS DISASTER. THIS CRISIS AFFECTS NOT ONLY THE INDIVIDUAL?S HEALTH BUT ALSO SOCIAL STABILITY. THIS STUDY AIMS TO REVEAL THE STRUCTURE AND SITUATION OF PUBLIC PSYCHOLOGICAL CRISIS DURING THE REMISSION PERIOD OF THE COVID-19 EPIDEMIC. DESIGN/METHOD…	COLLEGE OF ECONOMICS AND MANAGEMENT, SHANDONG UNIVERSITY OF SCIENCE AND TECHNOLOGY, QINGDAO, CHINA; TRANSPORTATION COLLEGE, SHANDONG UNIVERSITY OF SCIENCE AND TECHNOLOGY, QINGDAO, CHINA	COVID-19; PSYCHOLOGICAL CRISIS; PUBLIC; REMISSION; STATE	10.1108/CMS-08-2021-0351	ARTICLE		CHIN MANAGE STUD	CHIN. MANAGE. STUD.	ENGLISH	EMERALD PUBLISHING	2023	S. HAN; COLLEGE OF ECONOMICS AND MANAGEMENT, SHANDONG UNIVERSITY OF SCIENCE AND TECHNOLOGY, QINGDAO, CHINA; EMAIL: HESSA1222@163.COM	1750614X	CHINESE MANAGEMENT STUDIES	2	PUBLIC PSYCHOLOGICAL CRISIS REPORTS AN INVESTIGATION DURING THE REMISSION OF COVID19 IN CHINA	17	ISI	SHANDONG UNIVERSITY OF SCIENCE AND TECHNOLOGY;SHANDONG UNIVERSITY OF SCIENCE AND TECHNOLOGY	NOTREPORTED;SHANDONG UNIVERSITY OF SCIENCE AND TECHNOLOGY;NOTREPORTED	HAN S, 2023, CHIN MANAGE STUD	HAN S, 2023, CHIN MANAGE STUD
MUTYAMBIZI-MAFUNDA V;MYERS B;SORSDAHL K;OBSE A;LUND C;CLEARY S	none	THERE IS LIMITED EVIDENCE ON THE ECONOMIC BURDEN OF CHRONIC DISEASES WITH CO-OCCURRING DEPRESSION AND ALCOHOL USE DISORDER (AUD) FOR PEOPLE IN LOW-AND MIDDLE-INCOME COUNTRIES. WE DESCRIBE PATIENT COSTS RELATED TO THE UTILISATION OF SERVICES AND IDENTIFY FACTORS ASSOCIATED WITH THE ECONOMIC BURDEN OF CO-OCCURRING DEPRESSION AND AUD FOR PEOPLE WITH HIV AND/OR DIABETES USING GOVERNMENT HEALTH SERVIC…	HEALTH ECONOMICS UNIT, SCHOOL OF PUBLIC HEALTH, UNIVERSITY OF CAPE TOWN, CAPE TOWN, SOUTH AFRICA; CURTIN ENABLE INSTITUTE, FACULTY OF HEALTH SCIENCES, CURTIN UNIVERSITY, PERTH, WA, AUSTRALIA; MENTAL HEALTH, ALCOHOL, SUBSTANCE USE AND TOBACCO RESEARCH UNIT, SOUTH AFRICAN MEDICAL RESEARCH COUNCIL, FRANCIE VAN ZYL DRIVE, TYGERBERG, CAPE TOWN, 7505, SOUTH AFRICA; DIVISION OF ADDICTION PSYCHIATRY, PSY…	ALCOHOL; DEPRESSION; DIABETES; ECONOMIC BURDEN; GLOBAL MENTAL HEALTH; HIV; LMIC	10.1016/j.ssmmh.2023.100268	ARTICLE		SSM - MENT HEALTH	SSM - MENT. HEALTH	ENGLISH	ELSEVIER LTD	2023	V. MUTYAMBIZI-MAFUNDA; HEALTH ECONOMICS UNIT, UNIVERSITY OF CAPE TOWN, SCHOOL OF PUBLIC HEALTH, HEALTH SCIENCES FACULTY, CAPE TOWN, ANZIO ROAD, OBSERVATORY, 7925, SOUTH AFRICA; EMAIL: MTYVIM001@MYUCT.AC.ZA	26665603	SSM - MENTAL HEALTH	0	THE ECONOMIC BURDEN OF CHRONIC DISEASES WITH COOCCURRING DEPRESSION AND ALCOHOL USE DISORDER FOR PEOPLE IN THE WESTERN CAPE SOUTH AFRICA	4	ISI	UNIVERSITY OF CAPE TOWN;CURTIN UNIVERSITY;SOUTH AFRICAN MEDICAL RESEARCH COUNCIL;UNIVERSITY OF CAPE TOWN;UNIVERSITY OF CAPE TOWN;KING'S COLLEGE	NOTREPORTED;UNIVERSITY OF CAPE TOWN;NOTREPORTED	MUTYAMBIZI-MAFUNDA V, 2023, SSM - MENT HEALTH	MUTYAMBIZI-MAFUNDA V, 2023, SSM - MENT HEALTH
HU C;LIU Y;ZHAO F;XU Z;ZHANG L	none	INTRODUCTION: TO ASSESS THE SELF-PERCEIVED MENTAL HEALTH OF SOLDIERS AND OFFICERS IN THE SUBMARINE FORCE IN THE SOUTH CHINA SEA, THE RESULT OF THIS INVESTIGATION WAS COMPARED TO THE CHINESE MILITARY MALE NORMS, AND THE FACTORS THAT INFLUENCE THEIR MENTAL HEALTH WAS FURTHER EXPLORED. MATERIALS AND METHODS: A TOTAL OF 580 MALE SUBMARINERS AGREED TO PARTICIPATE. IN THE FINAL ANALYSIS, 511 VALID QUES…	INSTITUTE OF MILITARY HEALTH MANAGEMENT, NAVAL MEDICAL UNIVERSITY, SHANGHAI, 200433, CHINA		10.1093/milmed/usaa551	ARTICLE	ADULT; CHILD; CHINA; CROSS-SECTIONAL STUDIES; FEMALE; HEALTH STATUS; HUMANS; MALE; MENTAL HEALTH; MILITARY PERSONNEL; SURVEYS AND QUESTIONNAIRES; ADULT; CHILD; CHINA; CROSS-SECTIONAL STUDY; EPIDEMIOLOGY; FEMALE; HEALTH STATUS; HUMAN; MALE; MENTAL HEALTH; MILITARY PERSONNEL; PSYCHOLOGY; QUESTIONNAIRE	MIL MED	MIL. MED.	ENGLISH	OXFORD UNIVERSITY PRESS	2022		264075	MILITARY MEDICINE	2	THE SELFPERCEIVED MENTAL HEALTH STATUS AND FACTORS THAT INFLUENCE THE MENTAL HEALTH OF CHINESE SUBMARINERS IN THE SOUTH CHINA SEA A CROSSSECTIONAL STUDY	187	ISI	NAVAL MEDICAL UNIVERSITY	NAVAL MEDICAL UNIVERSITY	HU C, 2022, MIL MED	HU C, 2022, MIL MED
BENSON N;FENDRICK A	none	BACKGROUND: WHILE CONSUMER COST-SHARING IS A WIDELY USED STRATEGY TO MITIGATE HEALTH CARE SPENDING, NUMEROUS STUDIES HAVE DEMONSTRATED THAT EVEN MODEST LEVELS OF OUT-OF-POCKET COST ARE ASSOCIATED WITH LOWER USE OF MEDICAL CARE, INCLUDING CLINICALLY NECESSARY, HIGH-VALUE SERVICES. WITHIN MENTAL HEALTH CARE, INCREASES IN COST-SHARING ARE ASSOCIATED WITH REDUCTIONS IN USE OF MENTAL HEALTH CARE AND P…	MCLEAN HOSPITAL, BELMONT, MA, UNITED STATES; MONGAN INSTITUTE, MASSACHUSETTS GENERAL HOSPITAL, BOSTON, MA, UNITED STATES; DEPARTMENT OF PSYCHIATRY, HARVARD MEDICAL SCHOOL, BOSTON, MA, UNITED STATES; DEPARTMENTS OF INTERNAL MEDICINE, SCHOOL OF MEDICINE, UNIVERSITY OF MICHIGAN, ANN ARBOR, MI, UNITED STATES; DEPARTMENT OF HEALTH MANAGEMENT & POLICY, SCHOOL OF PUBLIC HEALTH, UNIVERSITY OF MICHIGAN, A…			ARTICLE	PSYCHOTROPIC AGENT; ARTICLE; CLINICAL OUTCOME; CONSUMER; COST; EMERGENCY CARE; HEALTH CARE COST; HEALTH CARE POLICY; HEALTH PROGRAM; HOSPITALIZATION; HUMAN; MEDICAL CARE; MEDICARE; MENTAL DISEASE; MENTAL HEALTH; MENTAL HEALTH CARE; MENTAL HEALTH SERVICE; VALUE-BASED INSURANCE DESIGN; ARTICLE; HUMAN EXPERIMENT; OUTCOME ASSESSMENT; PRICE	J MENTAL HEALTH POLICY ECON	J. MENTAL HEALTH POLICY ECON.	ENGLISH	ICMPE	2023	N.M. BENSON; MCLEAN HOSPITAL, BELMONT, 115 MILL ST, 02478, UNITED STATES; EMAIL: NBENSON@MGH.HARVARD.EDU	10914358	JOURNAL OF MENTAL HEALTH POLICY AND ECONOMICS	2	VALUEBASED INSURANCE DESIGN CLINICALLY NUANCED CONSUMER COSTSHARING FOR MENTAL HEALTH SERVICES	26	ISI	MCLEAN HOSPITAL;MONGAN INSTITUTE;HARVARD MEDICAL SCHOOL;UNIVERSITY OF MICHIGAN;UNIVERSITY OF MICHIGAN	NOTREPORTED;MCLEAN HOSPITAL;NOTREPORTED	BENSON NM, 2023, J MENTAL HEALTH POLICY ECON	BENSON NM, 2023, J MENTAL HEALTH POLICY ECON
QUINN C;WALLER B;HUGHLEY A;BOYD D;COBB R;HARDY K;RADNEY A;VOISIN D	none	STUDIES SUGGEST THAT RELIGION IS A PROTECTIVE FACTOR FOR SUBSTANCE MISUSE AND MENTAL HEALTH CONCERNS AMONG BLACK/AFRICAN AMERICAN YOUTH DESPITE REPORTED DECLINES IN THEIR RELIGIOUS INVOLVEMENT. HOWEVER, FEW STUDIES HAVE INVESTIGATED THE ASSOCIATIONS AMONG RELIGION, SUBSTANCE MISUSE, AND MENTAL HEALTH AMONG BLACK YOUTH. INFORMED BY CRITICAL RACE THEORY, WE EVALUATED THE CORRELATIONS BETWEEN GENDER…	CENTER FOR EQUITABLE FAMILY & COMMUNITY WELL-BEING, SCHOOL OF SOCIAL WORK, UNIVERSITY OF MICHIGAN, ANN ARBOR, 48109, MI, UNITED STATES; DEPARTMENT OF PSYCHIATRY, COLUMBIA UNIVERSITY IRVING MEDICAL CENTER, NEW YORK, 10032, NY, UNITED STATES; COLLEGE OF SOCIAL WORK, THE OHIO STATE UNIVERSITY, COLUMBUS, 43210, OH, UNITED STATES; SCHOOL OF SOCIAL WORK, RUTGERS, THE STATE UNIVERSITY OF NEW JERSEY, NEW…	BLACK YOUTH; CRITICAL THEORY; MENTAL HEALTH; RELIGIOSITY	10.3390/rel14030325	ARTICLE		RELIGIONS	RELIGIONS	ENGLISH	MDPI	2023	C.R. QUINN; CENTER FOR EQUITABLE FAMILY & COMMUNITY WELL-BEING, SCHOOL OF SOCIAL WORK, UNIVERSITY OF MICHIGAN, ANN ARBOR, 48109, UNITED STATES; EMAIL: CRQUINN@UMICH.EDU	20771444	RELIGIONS	5	THE RELATIONSHIP BETWEEN RELIGION SUBSTANCE MISUSE AND MENTAL HEALTH AMONG BLACK YOUTH	14	ISI	UNIVERSITY OF MICHIGAN;COLUMBIA UNIVERSITY IRVING MEDICAL CENTER;THE OHIO STATE UNIVERSITY;THE STATE UNIVERSITY OF NEW JERSEY;FAYETTEVILLE STATE UNIVERSITY;CASE WESTERN RESERVE UNIVERSITY	NOTREPORTED;UNIVERSITY OF MICHIGAN;NOTREPORTED	QUINN CR, 2023, RELIGIONS	QUINN CR, 2023, RELIGIONS
ROJTENBERG S;MOSCA D;VERDAGUER M;MARTINEZ M;ELORZA P	none	BACKGROUND: DESPITE THE HUGE GLOBAL SOCIOECONOMIC BURDEN OF DEPRESSIVE DISORDERS, DEPRESSION IS OFTEN UNDERREPORTED AND UNDERTREATED DUE TO A LOWER LEVEL OF AWARENESS FROM BOTH HEALTHCARE PROVIDERS AND PAYERS IN MANY COUNTRIES. THE LACK OF AN EVIDENCE-BASED APPROACH TO CARE DELIVERY HAS RESULTED IN THE INEQUITABLE ALLOCATION OF HEALTH RESOURCES, CAUSING RESOURCE SCARCITY ISSUES IN ARGENTINA. OBJE…	INSTITUTO DE SALUD MENTAL, ASOCIACI?N PSICOANAL?TICA DE BUENOS AIRES, BUENOS AIRES, ARGENTINA; SISTEMA DE ATENCI?N MÂDICA DE EMERGENCIAS DE LA CIUDAD DE BUENOS AIRES (SAME-PUBLIC EMS OF BUENOS AIRES CITY), BUENOS AIRES, ARGENTINA; DEPARTMENT OF PSYCHIATRY, BUENOS AIRES BRITISH HOSPITAL, SCHOOL OF MEDICINE, PONTIFICIA UNIVERSIDAD CAT?LICA ARGENTINA, BUENOS AIRES, ARGENTINA; RESEARCH, DEVELOPMENT …	DEPRESSION; DEPRESSION AWARENESS; FUNCTIONAL RECOVERY; MENTAL HEALTH; PSYCHIATRY; PSYCHOLOGY	10.2174/2666082219666230519102418	REVIEW	ADULT; ARGENTINA; AWARENESS; BIPOLAR DISORDER; DEPRESSION; DYSTHYMIA; EARLY DIAGNOSIS; GENERAL PRACTITIONER; HEALTH CARE POLICY; HEALTH LITERACY; HUMAN; MAJOR DEPRESSION; MENTAL HEALTH; PATIENT CARE; PATIENT COMPLIANCE; PREVALENCE; PSYCHOTHERAPY; QUANTITATIVE ANALYSIS; REVIEW; SOCIODEMOGRAPHICS; STIGMA; SYSTEMATIC REVIEW (TOPIC); THERAPEUTIC MISCONCEPTION; WORLD HEALTH ORGANIZATION	CURR PSYCHIATRY RESAND REV	CURR. PSYCHIATRY. RES.AND REV	ENGLISH	BENTHAM SCIENCE PUBLISHERS	2024	S. ROJTENBERG; INSTITUTO DE SALUD MENTAL, ASOCIACI?N PSICOANAL?TICA DE BUENOS AIRES, BUENOS AIRES, ARGENTINA; EMAIL: SERGIOROJTENBERG@GMAIL.COM	26660822	CURRENT PSYCHIATRY RESEARCH AND REVIEWS	0	THE WINDING PATH OF DEPRESSION IN ARGENTINA FROM AWARENESS TO FUNCTIONAL RECOVERY	20	ISI	INSTITUTO DE SALUD MENTAL;SISTEMA DE ATENCI?N MÂDICA DE EMERGENCIAS DE LA CIUDAD DE BUENOS AIRES (SAME-PUBLIC EMS OF BUENOS AIRES CITY);PONTIFICIA UNIVERSIDAD CAT?LICA ARGENTINA;RESEARCH	NOTREPORTED;INSTITUTO DE SALUD MENTAL;NOTREPORTED	ROJTENBERG S, 2024, CURR PSYCHIATRY RESAND REV	ROJTENBERG S, 2024, CURR PSYCHIATRY RESAND REV
KOTZEVA A;MITTAL D;DESAI S;JUDGE D;SAMANTA K	none	AIMS: SCHIZOPHRENIA HAS THE HIGHEST MEDIAN SOCIETAL COST PER PATIENT OF ALL MENTAL DISORDERS. THIS REVIEW SUMMARIZES THE DIFFERENT COSTS/COST DRIVERS (COST COMPONENTS) ASSOCIATED WITH SCHIZOPHRENIA IN 10 COUNTRIES, INCLUDING ALL COST TYPES AND STAKEHOLDER PERSPECTIVES, AND HIGHLIGHTS ASPECTS OF DISEASE ASSOCIATED WITH GREATEST COSTS. MATERIALS AND METHODS: TARGETED LITERATURE REVIEW BASED ON A SE…	F. HOFFMANN - LA ROCHE, BASEL, SWITZERLAND; BRIDGE MEDICAL CONSULTING LTD, RICHMOND, UNITED KINGDOM; ROCHE PRODUCTS LTD, WELWYN GARDEN CITY, UNITED KINGDOM	COST OF ILLNESS; DIRECT COSTS; INDIRECT COSTS; NEGATIVE SYMPTOMS; SCHIZOPHRENIA	10.1080/13696998.2022.2157596	REVIEW	CHINA; COST OF ILLNESS; HEALTH CARE COSTS; HUMANS; LONG-TERM CARE; SCHIZOPHRENIA; SOCIOECONOMIC FACTORS; UNITED STATES; ADVERSE EVENT; BIOMEDICAL TECHNOLOGY ASSESSMENT; BRAZIL; CANADA; CHINA; DISEASE BURDEN; DRUG COST; EVIDENCE BASED PRACTICE; FRANCE; GERMANY; HEALTH CARE COST; HOSPITAL PATIENT; HUMAN; ITALY; JAPAN; LONG TERM CARE; MEDICAL LITERATURE; NEGATIVE SYNDROME; REVIEW; SCHIZOPHRENIA; SOC…	J MED ECON	J. MED. ECON.	ENGLISH	TAYLOR AND FRANCIS LTD.	2023	A. KOTZEVA; F. HOFFMANN-LA ROCHE LTD, BASEL, GRENZACHERSTRASSE 124, BUILDING 2, 4070, SWITZERLAND; EMAIL: ANNA.KOTZEVA@ROCHE.COM	13696998	JOURNAL OF MEDICAL ECONOMICS	21	SOCIOECONOMIC BURDEN OF SCHIZOPHRENIA A TARGETED LITERATURE REVIEW OF TYPES OF COSTS AND ASSOCIATED DRIVERS ACROSS 10 COUNTRIES	26	ISI	NOTREPORTED	NOTREPORTED;NOTREPORTED;NOTREPORTED	KOTZEVA A, 2023, J MED ECON	KOTZEVA A, 2023, J MED ECON
NELSON K;POWELL B;LANGELLIER B;L?-SCHERBAN F;SHATTUCK P;HOAGWOOD K;PURTLE J	none	TO IDENTIFY THE STATE-LEVEL POLICIES AND POLICY DOMAINS THAT STATE POLICYMAKERS AND ADVOCATES PERCEIVE AS MOST IMPORTANT FOR POSITIVELY IMPACTING THE USE OF CHILDREN?S MENTAL HEALTH SERVICES (CMHS). WE USED A MODIFIED DELPHI TECHNIQUE (I.E., TWO ROUNDS OF QUESTIONNAIRES AND AN INTERVIEW) DURING SPRING 2021 TO ELICIT PERCEPTIONS AMONG STATE MENTAL HEALTH AGENCY OFFICIALS AND ADVOCATES (N = 28) FRO…	DEPARTMENT OF HEALTH MANAGEMENT AND POLICY, DREXEL UNIVERSITY DORNSIFE SCHOOL OF PUBLIC HEALTH, 3215 MARKET ST, PHILADELPHIA, 19104, PA, UNITED STATES; BROWN SCHOOL AND SCHOOL OF MEDICINE, WASHINGTON UNIVERSITY IN ST. LOUIS, ST. LOUIS, MO, UNITED STATES; DEPARTMENT OF EPIDEMIOLOGY AND BIOSTATISTICS, DREXEL UNIVERSITY DORNSIFE SCHOOL OF PUBLIC HEALTH, PHILADELPHIA, PA, UNITED STATES; MATHEMATICA P…	ADVOCATES; CHILDREN; MENTAL HEALTH SERVICES; POLICYMAKERS; STATE POLICY	10.1007/s10488-022-01201-6	ARTICLE	CHILD; DELPHI TECHNIQUE; HUMANS; INSURANCE COVERAGE; MEDICAID; MENTAL HEALTH SERVICES; PUBLIC POLICY; UNITED STATES; ARTICLE; CHILD; CLINICAL ARTICLE; CONTROLLED STUDY; DELPHI STUDY; FEMALE; HUMAN; HUMAN EXPERIMENT; LIKERT SCALE; MALE; MEDICAID; MENTAL HEALTH; PARITY; PERCEPTION; QUESTIONNAIRE; REIMBURSEMENT; SCHOOL MENTAL HEALTH SERVICE; SPRING; DELPHI STUDY; INSURANCE; MENTAL HEALTH SERVICE; PU…	ADM POLICY MENT HEALTH MENT HEALTH SERV RES	ADM. POLICY MENT. HEALTH MENT. HEALTH SERV. RES.	ENGLISH	SPRINGER	2022	K.L. NELSON; DEPARTMENT OF HEALTH MANAGEMENT AND POLICY, DREXEL UNIVERSITY DORNSIFE SCHOOL OF PUBLIC HEALTH, PHILADELPHIA, 3215 MARKET ST, 19104, UNITED STATES; EMAIL: KATIENELSONPHD@GMAIL.COM	0894587X	ADMINISTRATION AND POLICY IN MENTAL HEALTH AND MENTAL HEALTH SERVICES RESEARCH	4	STATE POLICIES THAT IMPACT THE DESIGN OF CHILDRENS MENTAL HEALTH SERVICES A MODIFIED DELPHI STUDY	49	ISI	DREXEL UNIVERSITY DORNSIFE SCHOOL OF PUBLIC HEALTH;WASHINGTON UNIVERSITY IN ST. LOUIS;DREXEL UNIVERSITY DORNSIFE SCHOOL OF PUBLIC HEALTH;MATHEMATICA POLICY RESEARCH;NEW YORK UNIVERSITY LANGONE SCHOOL OF MEDICINE;NEW YORK UNIVERSITY SCHOOL OF GLOBAL PUBLIC HEALTH	NOTREPORTED;DREXEL UNIVERSITY DORNSIFE SCHOOL OF PUBLIC HEALTH;NOTREPORTED	NELSON KL, 2022, ADM POLICY MENT HEALTH MENT HEALTH SERV RES	NELSON KL, 2022, ADM POLICY MENT HEALTH MENT HEALTH SERV RES
RYU S;FAN L	none	THIS STUDY EXAMINES THE ASSOCIATION BETWEEN FINANCIAL WORRIES AND PSYCHOLOGICAL DISTRESS AMONG US ADULTS AND TESTS ITS MODERATING EFFECTS BY GENDER, MARITAL STATUS, EMPLOYMENT STATUS, EDUCATION, AND INCOME LEVELS. DATA WERE DERIVED FROM THE CROSS-SECTIONAL 2018 NATIONAL HEALTH INTERVIEW SURVEY (NHIS) OF THE ADULT POPULATION. THE HIERARCHICAL REGRESSION ANALYSIS REVEALED THAT HIGHER FINANCIAL WORR…	SCHOOL OF PUBLIC POLICY, UNIVERSITY OF MARYLAND, 2101 VAN MUNCHING HALL, COLLEGE PARK, 20742, MD, UNITED STATES; DEPARTMENT OF FINANCIAL PLANNING, HOUSING AND CONSUMER ECONOMICS, UNIVERSITY OF GEORGIA, 205 DAWSON HALL, 305 SANFORD DRIVE, ATHENS, 30602, GA, UNITED STATES	FINANCIAL STRAINS; FINANCIAL WORRIES; MENTAL HEALTH; PSYCHOLOGICAL DISTRESS	10.1007/s10834-022-09820-9	ARTICLE		J FAM ECON ISSUES	J. FAM. ECON. ISSUES	ENGLISH	SPRINGER	2023	L. FAN; DEPARTMENT OF FINANCIAL PLANNING, HOUSING AND CONSUMER ECONOMICS, UNIVERSITY OF GEORGIA, ATHENS, 205 DAWSON HALL, 305 SANFORD DRIVE, 30602, UNITED STATES; EMAIL: LUFAN@UGA.EDU	10580476	JOURNAL OF FAMILY AND ECONOMIC ISSUES	96	THE RELATIONSHIP BETWEEN FINANCIAL WORRIES AND PSYCHOLOGICAL DISTRESS AMONG US ADULTS	44	ISI	UNIVERSITY OF MARYLAND;UNIVERSITY OF GEORGIA	NOTREPORTED;UNIVERSITY OF GEORGIA;NOTREPORTED	RYU S, 2023, J FAM ECON ISSUES	RYU S, 2023, J FAM ECON ISSUES
YAMAGUCHI S;BENTAYEB N;HOLTOM A;MOLNAR P;CONSTANTINESCU T;TISDALL E;TUONG J;IYER S;RUIZ-CASARES M	none	ALTHOUGH YOUTH PARTICIPATION IS OFT-ACKNOWLEDGED AS UNDERPINNING MENTAL HEALTH POLICY AND SERVICE REFORM, LITTLE ROBUST EVIDENCE EXISTS ABOUT THE PARTICIPATION OF CHILDREN AND YOUTH IN MENTAL HEALTH POLICYMAKING. A SCOPING REVIEW BASED ON ARKSEY AND O?MALLEY?S FRAMEWORK WAS CONDUCTED TO IDENTIFY AND SYNTHESIZE AVAILABLE INFORMATION ON CHILDREN AND YOUTH?S PARTICIPATION IN MENTAL HEALTH POLICYMAKI…	CHILD-BRIGHT NETWORK, RESEARCH INSTITUTE OF THE MCGILL UNIVERSITY HEALTH CENTRE, MONTREAL, QC, CANADA; SCHOOL OF PHYSICAL AND OCCUPATIONAL THERAPY, FACULTY OF MEDICINE AND HEALTH SCIENCES, MCGILL UNIVERSITY, MONTREAL, QC, CANADA; DEPARTMENT OF PSYCHIATRY, MCGILL UNIVERSITY, 1033 PINE AVE W, MONTREAL, H3A 1A1, QC, CANADA; CIUSSS DU CENTRE-OUEST-DE-L??LE-DE-MONTRÂAL, SHERPA UNIVERSITY INSTITUTE, M…	CHILDREN AND YOUTH; DIVERSITY; MENTAL HEALTH; PARTICIPATION; POLICYMAKING; REVIEW	10.1007/s10488-022-01223-0	ARTICLE	ADOLESCENT; ADULT; CHILD; HUMANS; MENTAL HEALTH; POLICY; POLICY MAKING; ADULT; ARTICLE; CHILD; CHILD HEALTH; DATA EXTRACTION; ELECTRONIC CONSULTATION; FEMALE; GREY LITERATURE; HUMAN; HUMAN EXPERIMENT; JUVENILE; MALE; MEDLINE; MENTAL HEALTH; ORGANIZATION; PSYCINFO; SCOPUS; SEARCH ENGINE; SOCIOLOGY; SYSTEMATIC REVIEW; ADOLESCENT; MANAGEMENT; POLICY	ADM POLICY MENT HEALTH MENT HEALTH SERV RES	ADM. POLICY MENT. HEALTH MENT. HEALTH SERV. RES.	ENGLISH	SPRINGER	2023	S. YAMAGUCHI; DEPARTMENT OF PSYCHIATRY, MCGILL UNIVERSITY, MONTREAL, 1033 PINE AVE W, H3A 1A1, CANADA; EMAIL: SAKIKO.YAMAGUCHI@MAIL.MCGILL.CA	0894587X	ADMINISTRATION AND POLICY IN MENTAL HEALTH AND MENTAL HEALTH SERVICES RESEARCH	3	PARTICIPATION OF CHILDREN AND YOUTH IN MENTAL HEALTH POLICYMAKING A SCOPING REVIEW PART I	50	ISI	RESEARCH INSTITUTE OF THE MCGILL UNIVERSITY HEALTH CENTRE;MCGILL UNIVERSITY;MCGILL UNIVERSITY;SHERPA UNIVERSITY INSTITUTE;MCGILL UNIVERSITY;UNIVERSITY OF EDINBURGH;MCGILL UNIVERSITY;DOUGLAS RESEARCH CENTRE;TORONTO METROPOLITAN UNIVERSITY	NOTREPORTED;MCGILL UNIVERSITY;NOTREPORTED	YAMAGUCHI S, 2023, ADM POLICY MENT HEALTH MENT HEALTH SERV RES	YAMAGUCHI S, 2023, ADM POLICY MENT HEALTH MENT HEALTH SERV RES
HONG S;WALTON B;KIM H;KABOI M;MOYNIHAN S;RHEE T	none	BACKGROUND: PREVIOUS STUDIES EXAMINED THE IMPACT OF THE COVID-19 PANDEMIC ON MENTAL HEALTH, BUT FEW STUDIES LOOKED AT ASSOCIATIONS BETWEEN THE PANDEMIC AND STATE-FUNDED BEHAVIORAL HEALTH SERVICE UTILIZATION. WE AIMED TO EXAMINE BEHAVIORAL HEALTH SERVICE UTILIZATION DURING THE EARLY PHASE OF COVID-19 AMONG INDIVIDUALS WITH PSYCHIATRIC DISORDERS (PD), SUBSTANCE USE DISORDERS (SUD), AND CO-OCCURRING…	SCHOOL OF SOCIAL WORK, INDIANA UNIVERSITY, INDIANAPOLIS, IN, UNITED STATES; DIVISION OF MENTAL HEALTH AND ADDICTION, INDIANA FAMILY AND SOCIAL SERVICES ADMINISTRATION, INDIANAPOLIS, IN, UNITED STATES; DEPARTMENT OF PUBLIC HEALTH SCIENCES, SCHOOL OF MEDICINE, UNIVERSITY OF CONNECTICUT, FARMINGTON, CT, UNITED STATES; DEPARTMENT OF PSYCHIATRY, SCHOOL OF MEDICINE, YALE UNIVERSITY, NEW HAVEN, CT, UNIT…	ADULT NEEDS AND STRENGTHS ASSESSMENT (ANSA); BEHAVIORAL HEALTH SERVICE UTILIZATION; COMPLEXITY OF NEEDS; DISPARITIES; EARLY PANDEMIC	10.1007/s12529-023-10192-z	ARTICLE	ADOLESCENT; ADULT; AGED; COVID-19; ETHNICITY; FEMALE; HEALTHCARE DISPARITIES; HUMANS; MALE; MENTAL DISORDERS; MENTAL HEALTH SERVICES; MIDDLE AGED; PATIENT ACCEPTANCE OF HEALTH CARE; SUBSTANCE-RELATED DISORDERS; YOUNG ADULT; ADOLESCENT; ADULT; AGED; CORONAVIRUS DISEASE 2019; DRUG DEPENDENCE; EPIDEMIOLOGY; ETHNICITY; FEMALE; HEALTH CARE DISPARITY; HUMAN; MALE; MENTAL DISEASE; MENTAL HEALTH SERVICE;…	INT J BEHAV MED	INT. J. BEHAV. MED.	ENGLISH	SPRINGER	2024	S. HONG; SCHOOL OF SOCIAL WORK, INDIANA UNIVERSITY, INDIANAPOLIS, UNITED STATES; EMAIL: SAAHONG@IU.EDU	10705503	INTERNATIONAL JOURNAL OF BEHAVIORAL MEDICINE	1	EXPLORING DISPARITIES IN BEHAVIORAL HEALTH SERVICE USE IN THE EARLY STAGES OF THE COVID19 PANDEMIC	31	ISI	INDIANA UNIVERSITY;DIVISION OF MENTAL HEALTH AND ADDICTION;UNIVERSITY OF CONNECTICUT;YALE UNIVERSITY	NOTREPORTED;INDIANA UNIVERSITY;NOTREPORTED	HONG S, 2024, INT J BEHAV MED	HONG S, 2024, INT J BEHAV MED
LATA K;AJESH K T;KHAKHA D;DEEP R	none	IN INDIA, MORE THAN 90% OF THE PATIENT WITH CHRONIC MENTAL ILLNESS STAYED WITH THEIR FAMILY MEMBERS. APPROXIMATELY 77.4% OF CAREGIVERS EXPERIENCE MODERATE TO SEVERE LEVELS OF AGGRESSION. THE PURPOSE OF THIS STUDY WAS TO EVALUATE THE EFFECTIVENESS OF CAREGIVER-TRAINING PROGRAM ON KNOWLEDGE IN MANAGING AGGRESSIVE BEHAVIOR OF MENTALLY ILL AT HOME. RESEARCH DESIGN WAS PRE-EXPERIMENTAL. SEVENTY TWO CA…	ALL INDIA INSTITUTE OF MEDICAL SCIENCES, NEW DELHI, DELHI, NEW DELHI, INDIA	AGGRESSION; CAREGIVER TRAINING; CARER; EFFECTIVENESS; HOME MANAGEMENT; SEVERE MENTAL ILLNESS	10.1177/10848223211039448	ARTICLE		HOME HEALTH CARE MANAGE PRACT	HOME HEALTH CARE MANAGE. PRACT.	ENGLISH	SAGE PUBLICATIONS INC.	2022	K. LATA; ALL INDIA INSTITUTE OF MEDICAL SCIENCES, NEW DELHI, NEW DELHI, DELHI, INDIA; EMAIL: KUSUM.BHARDWAJ.133@GMAIL.COM	10848223	HOME HEALTH CARE MANAGEMENT AND PRACTICE	0	EFFECTIVENESS OF A HOME BASED TRAINING PROGRAM ON CAREGIVERS KNOWLEDGE IN MANAGING AGGRESSIVE BEHAVIOR OF PATIENTS WITH MENTAL ILLNESS	34	ISI	ALL INDIA INSTITUTE OF MEDICAL SCIENCES	NOTREPORTED;ALL INDIA INSTITUTE OF MEDICAL SCIENCES;NOTREPORTED	LATA K, 2022, HOME HEALTH CARE MANAGE PRACT	LATA K, 2022, HOME HEALTH CARE MANAGE PRACT
RICHARDSON C	none	PURPOSE: ROUGHLY 3 MILLION ADULT AMERICANS HAVE A VISUAL IMPAIRMENT OR BLINDNESS, AND OVER 4 MILLION ADULTS AGED 40 AND OLDER. DESPITE DATA DEMONSTRATING AN ELEVATED PREVALENCE OF MENTAL HEALTH SYMPTOMS IN PEOPLE WITH BVI, THIS POPULATION REMAINS LARGELY UNTREATED. GIVEN THAT PEOPLE WITH BVI OFTEN INTERFACE WITH MULTIPLE SYSTEMS OF REHABILITATIVE CARE THAT ARE DESIGNED TO IMPROVE QUALITY OF LIFE,…	SCHOOL OF SOCIAL WORK, SIMMONS UNIVERSITY, BOSTON, MA, UNITED STATES	BLINDNESS; CRITICAL THEORIES; MENTAL HEALTH; ORIENTATION AND MOBILITY; REHABILITATION; VISION LOSS; VISUAL IMPAIRMENT; VOCATIONAL REHABILITATION	10.2147/OPTH.S442430	REVIEW	ANXIETY; ATTITUDE; AUTOMUTILATION; BECK ANXIETY INVENTORY; BEHAVIOR; BEHAVIOR CHANGE; BLINDNESS; COGNITION; COGNITIVE BEHAVIORAL THERAPY; CRITICAL THEORY; DISABILITY; DISTRESS SYNDROME; EDUCATION; EMOTION; EMPLOYMENT STATUS; HEALTH CARE DELIVERY; HEALTH CARE NEED; HEALTH CARE POLICY; HEALTH CARE UTILIZATION; HUMAN; JOB SATISFACTION; LEARNING DISORDER; LIFE SATISFACTION; MEDICAL PRACTICE; MENTAL D…	CLIN OPHTHALMOL	CLIN. OPHTHALMOL.	ENGLISH	DOVE MEDICAL PRESS LTD	2024	C.G. RICHARDSON; SCHOOL OF SOCIAL WORK, SIMMONS UNIVERSITY, BOSTON, 300 THE FENWAY, 02115, UNITED STATES; EMAIL: DR.RICHARDSON-MAIL@CLAIRISSA.ORG	11775467	CLINICAL OPHTHALMOLOGY	0	THE UNDERUTILIZATION OF MENTAL HEALTH CARE SERVICES IN THE LIVES OF PEOPLE WITH BLINDNESS OR VISUAL IMPAIRMENT A LITERATURE REVIEW ON REHABILITATION FACTORS TOWARD PROVISION	18	ISI	SIMMONS UNIVERSITY	NOTREPORTED;SIMMONS UNIVERSITY;NOTREPORTED	RICHARDSON CG, 2024, CLIN OPHTHALMOL	RICHARDSON CG, 2024, CLIN OPHTHALMOL
NAEEM F;PHIRI P;HUSAIN N	none		DEPARTMENT OF PSYCHIATRY, UNIVERSITY OF TORONTO, TORONTO, ON, CANADA; PSYCHOLOGY DEPARTMENT, VISITING ACADEMIC, UNIVERSITY OF SOUTHAMPTON, ENGLAND, SOUTHAMPTON, UNITED KINGDOM; DEPARTMENT OF PSYCHIATRY, UNIVERSITY OF MANCHESTER, ENGLAND, MANCHESTER, UNITED KINGDOM	COGNITIVE THERAPY; CULTURALLY ADAPTED CBT; CULTURE; SOUTHAMPTON ADAPTATION FRAMEWORK	10.1016/j.psc.2024.02.009	REVIEW	COGNITIVE BEHAVIORAL THERAPY; CULTURALLY COMPETENT CARE; HUMANS; ADAPTATION; AWARENESS; COGNITIVE BEHAVIORAL THERAPY; CULTURAL ANTHROPOLOGY; CULTURAL FACTOR; EVIDENCE BASED PRACTICE; HUMAN; MINORITY GROUP; PATIENT ENGAGEMENT; RELIGION; REVIEW; PROCEDURES; TRANSCULTURAL CARE	PSYCHIATR CLIN NORTH AM	PSYCHIATR. CLIN. NORTH AM.	ENGLISH	W.B. SAUNDERS	2024	F. NAEEM; TORONTO, 10 WHITE SQUIRREL WAY, M6J 1H4, CANADA; EMAIL: FAROOQNAEEM@YAHOO.COM	0193953X	PSYCHIATRIC CLINICS OF NORTH AMERICA	0	SOUTHAMPTON ADAPTATION FRAMEWORK TO CULTURALLY ADAPT COGNITIVE BEHAVIOR THERAPY AN UPDATE	47	ISI	UNIVERSITY OF TORONTO;UNIVERSITY OF SOUTHAMPTON;UNIVERSITY OF MANCHESTER	NOTREPORTED;NOTREPORTED;NOTREPORTED	NAEEM F, 2024, PSYCHIATR CLIN NORTH AM	NAEEM F, 2024, PSYCHIATR CLIN NORTH AM
RADHAMONY R;CROSS W;TOWNSIN L;BANIK B	none	WHAT IS KNOWN ABOUT THE SUBJECT?: IMMIGRANT, REFUGEE AND ASYLUM SEEKER POPULATIONS WORLDWIDE ARE AT HIGH RISK OF MENTAL HEALTH ISSUES NATIONAL MENTAL HEALTH POLICIES CALL FOR RECOGNISING AUSTRALIAN SOCIETY'S MULTICULTURAL CHARACTERISTICS TO ENSURE ADEQUATE MENTAL HEALTH SERVICES TO CALD COMMUNITIES SEVERAL BARRIERS EXIST FOR PEOPLE FROM CALD COMMUNITIES IN VICTORIA TO ACCESS AND UTILISE MENTAL HE…	INSTITUTE OF HEALTH AND WELLBEING, FEDERATION UNIVERSITY, BERWICK, AUSTRALIA; FEDERATION UNIVERSITY, BERWICK, AUSTRALIA; TORRENS UNIVERSITY, ADELAIDE, SA, AUSTRALIA; MANNA INSTITUTE, REGIONAL AUSTRALIA MENTAL HEALTH RESEARCH AND TRAINING INSTITUTE, A PROJECT OF REGIONAL UNIVERSITY NETWORK (RUN), LED BY THE UNIVERSITY OF NEW ENGLAND, ARMIDALE, NSW, AUSTRALIA	CALD COMMUNITY IN VICTORIA; CULTURAL DIVERSITY; MENTAL HEALTH ISSUES; UNDERSTANDING AND EXPERIENCES OF MENTAL HEALTH SERVICES	10.1111/jpm.12919	ARTICLE	AUSTRALIA; CULTURAL DIVERSITY; HEALTH PERSONNEL; HEALTH SERVICES ACCESSIBILITY; HUMANS; MENTAL HEALTH SERVICES; ADULT; ARTICLE; AUSTRALIA; CLINICAL ARTICLE; COMMUNICATION BARRIER; COMMUNITY PARTICIPATION; CONTROLLED STUDY; CULTURAL COMPETENCE; CULTURAL DIVERSITY; CULTURAL SAFETY; DISTRUST; EARLY INTERVENTION; EDUCATION; FEMALE; HEALTH CARE DELIVERY; HEALTH CARE FACILITY; HEALTH CARE UTILIZATION; …	J PSYCHIATR MENT HEALTH NURS	J. PSYCHIATR. MENT. HEALTH. NURS.	ENGLISH	JOHN WILEY AND SONS INC	2023	R. RADHAMONY; INSTITUTE OF HEALTH AND WELLBEING, FEDERATION UNIVERSITY, BERWICK, AUSTRALIA; EMAIL: RESHMYRADHAMONY@STUDENTS.FEDERATION.EDU.AU	13510126	JOURNAL OF PSYCHIATRIC AND MENTAL HEALTH NURSING	6	PERSPECTIVES OF CULTURALLY AND LINGUISTICALLY DIVERSE CALD COMMUNITY MEMBERS REGARDING MENTAL HEALTH SERVICES A QUALITATIVE ANALYSIS	30	ISI	FEDERATION UNIVERSITY;FEDERATION UNIVERSITY;TORRENS UNIVERSITY;A PROJECT OF REGIONAL UNIVERSITY NETWORK (RUN)	NOTREPORTED;FEDERATION UNIVERSITY;EMAIL: RESHMYRADHAMONY@STUDENTS.FEDERATION.EDU.AU	RADHAMONY R, 2023, J PSYCHIATR MENT HEALTH NURS	RADHAMONY R, 2023, J PSYCHIATR MENT HEALTH NURS
MAJCHEREK D;KOWALSKI A;LEWANDOWSKA M	none	ENSURING THE HEALTH AND WELL-BEING OF WORKERS SHOULD BE A TOP PRIORITY FOR EMPLOYERS AND GOVERNMENTS. THE AIM OF THE ARTICLE IS TO EVALUATE AND RANK THE IMPORTANCE OF MENTAL HEALTH DETERMINANTS: LIFESTYLE, DEMOGRAPHIC FACTORS AND SOCIO-ECONOMIC STATUS. THE RESEARCH STUDY IS BASED ON EHIS 2013?2015 DATA FOR A SAMPLE OF N = 140,791 EMPLOYEES FROM 30 EUROPEAN COUNTRIES. THE RESULTS OBTAINED USING MA…	DEPARTMENT OF INTERNATIONAL MANAGEMENT, COLLEGIUM OF WORLD ECONOMY, SGH WARSAW SCHOOL OF ECONOMICS, AL. NIEPODLEG?O?CI 162, WARSAW, 02-554, POLAND; WORLD ECONOMY RESEARCH INSTITUTE, COLLEGIUM OF WORLD ECONOMY, SGH WARSAW SCHOOL OF ECONOMICS, AL. NIEPODLEG?O?CI 162, WARSAW, 02-554, POLAND	DEMOGRAPHIC; EUROPEAN COUNTRIES; EUROPEAN HEALTH INTERVIEW SURVEY; GRADIENT-BOOSTED TREES; LIFESTYLE; MENTAL DISORDERS; MENTAL HEALTH; SOCIO-ECONOMIC STATUS	10.3390/ijerph191911913	ARTICLE	DEMOGRAPHY; HUMANS; LIFE STYLE; MENTAL DISORDERS; MENTAL HEALTH; SOCIOECONOMIC FACTORS; EUROPE; DEMOGRAPHY; HEALTH SURVEY; LIFESTYLE; MENTAL DISORDER; SOCIOECONOMIC CONDITIONS; ADULT; AGED; ALCOHOL CONSUMPTION; ALGORITHM; ARTICLE; BODY MASS; COGNITION; DEMOGRAPHICS; EDUCATION; EMPLOYEE; ENVIRONMENTAL FACTOR; ETHNICITY; EUROPEAN; EXTREME GRADIENT BOOSTING; FEMALE; HEALTH BEHAVIOR; HEALTHY LIFESTYL…	INT J ENVIRON RES PUBLIC HEALTH	INT. J. ENVIRON. RES. PUBLIC HEALTH	ENGLISH	MDPI	2022	D. MAJCHEREK; DEPARTMENT OF INTERNATIONAL MANAGEMENT, COLLEGIUM OF WORLD ECONOMY, SGH WARSAW SCHOOL OF ECONOMICS, WARSAW, AL. NIEPODLEG?O?CI 162, 02-554, POLAND; EMAIL: DMAJCHE@SGH.WAW.PL	16617827	INTERNATIONAL JOURNAL OF ENVIRONMENTAL RESEARCH AND PUBLIC HEALTH	7	LIFESTYLE DEMOGRAPHIC AND SOCIOECONOMIC DETERMINANTS OF MENTAL HEALTH DISORDERS OF EMPLOYEES IN THE EUROPEAN COUNTRIES	19	ISI	COLLEGIUM OF WORLD ECONOMY;COLLEGIUM OF WORLD ECONOMY	NOTREPORTED;COLLEGIUM OF WORLD ECONOMY;NOTREPORTED	MAJCHEREK D, 2022, INT J ENVIRON RES PUBLIC HEALTH	MAJCHEREK D, 2022, INT J ENVIRON RES PUBLIC HEALTH
MERINO M;MARAVILLA-HERRERA P;LORENZO T;ARANCE J;BOBES J;CORRALES M;GUZM?N F;MORALES M;MUR C	none	INTRODUCTION: THE SYMPTOMS OF ATTENTION-DEFICIT/HYPERACTIVITY DISORDER (ADHD) IN ADULTS HIGHLY INTERFERE WITH FUNCTION IN MULTIPLE DIMENSIONS, INCREASING THE ECONOMIC BURDEN ASSOCIATED WITH ADHD. THE AIM OF THIS STUDY WAS TO EXPLORE THE IMPACT OF ADHD IN SPANISH ADULTS AND ESTIMATE THE ASSOCIATED ECONOMIC BURDEN WITHIN THE HEALTHCARE, SOCIAL, ECONOMIC, AND LEGAL DOMAINS. METHODS: AN ECONOMIC MODE…	VIVACTIS WEBER, MADRID, SPAIN; ALBOLOTE PENITENTIARY, GRANADA, SPAIN; DEPARTMENT OF MEDICINE, OVIEDO UNIVERSITY, OVIEDO, SPAIN; DEPARTMENT OF PSYCHIATRY, ASTURIAS CENTRAL UNIVERSITY HOSPITAL (HUCA), OVIEDO, SPAIN; PRINCIPADO DE ASTURIAS HEALTH RESEARCH INSTITUTE, ISPA, OVIEDO, SPAIN; PRINCIPADO DE ASTURIAS NEUROSCIENCES CENTER, INEUROPA, OVIEDO, SPAIN; NETWORK BIOMEDICAL RESEARCH CENTRE ON MENTAL…	ADULT ADHD; BURDEN OF DISEASE; HEALTHCARE SYSTEM; SOCIAL PERSPECTIVE; SUBSTANCE ABUSE; WORK PRODUCTIVITY LOSS	10.33393/grhta.2024.2697	ARTICLE	ATOMOXETINE; LISDEXAMFETAMINE; METHYLPHENIDATE; ABSENTEEISM; ADULT; ALCOHOLISM; ARTICLE; ATTENTION DEFICIT HYPERACTIVITY DISORDER; COCAINE SMOKING; CONSULTATION; CONTROLLED STUDY; DISEASE BURDEN; DRUG DEPENDENCE TREATMENT; ECONOMIC MODEL; EMERGENCY CARE; FOLLOW UP; GENERAL PRACTITIONER; HEALTH CARE COST; HEALTH CARE SYSTEM; HEALTH CARE UTILIZATION; HOSPITALIZATION COST; HUMAN; IMPRISONMENT; LEGAL…	GLOBAL REG HEALTH TECHNOL ASSESS	GLOBAL REG. HEALTH TECHNOL. ASSESS.	ENGLISH	ABOUTSCIENCE SRL	2024	M. MERINO; VIVACTIS WEBER, MADRID, SPAIN; EMAIL: MARIA.MERINO@WEBER.ORG.ES	22842403	GLOBAL AND REGIONAL HEALTH TECHNOLOGY ASSESSMENT	0	THE SOCIOECONOMIC BURDEN OF ADULT ATTENTIONDEFICIT HYPERACTIVITY DISORDER IN SPAIN	11	ISI	OVIEDO UNIVERSITY;ASTURIAS CENTRAL UNIVERSITY HOSPITAL (HUCA);PRINCIPADO DE ASTURIAS HEALTH RESEARCH INSTITUTE;PRINCIPADO DE ASTURIAS NEUROSCIENCES CENTER;NETWORK BIOMEDICAL RESEARCH CENTRE ON MENTAL HEALTH?CIBERSAM;VALL D?HEBRON UNIVERSITY HOSPITAL;PUERTA DE HIERRO UNIVERSITY HOSPITAL;HOSPITAL NOSTRA SENYORA DE MERITXELL	NOTREPORTED;NOTREPORTED;NOTREPORTED	MERINO M, 2024, GLOBAL REG HEALTH TECHNOL ASSESS	MERINO M, 2024, GLOBAL REG HEALTH TECHNOL ASSESS
BEN B A;WILLIAMS N;ESTEINOU R;ACERO I;MESURADO B;DEBELIUH P;STOROPOLI J;ORELLANA O;JAMES S	none	THIS STUDY EXAMINED PARENTS? (N = 10,141, 64% WOMEN) REPORTS OF THEIR AND THEIR CHILDRENS? DEPRESSION, ANXIETY, AND STRESS IN BRAZIL, MEXICO, COLOMBIA AND ARGENTINA. THE DATA COME FROM THE COVID-19 FAMILY LIFE STUDY (BEN BRIK, 2020) AND COHORT RECRUITED BETWEEN APRIL AND DECEMBER 2020. PARTICIPANTS COMPLETED ONLINE SURVEYS THAT INCLUDED THE DASS-21 AND THE REVISED CHILDREN'S MANIFEST ANXIETY SCAL…	COLLEGE OF PUBLIC POLICY, HAMAD BIN, KHALIFA UNIVERSITY, DOHA, QATAR; COLLEGE OF EDUCATION AND HUMAN SCIENCES, UNIVERSITYÃ¿OFÃ¿NEBRASKA?LINCOLN, LINCOLN, NE, UNITED STATES; CENTRO DE INVESTIGACIONES Y ESTUDIOS SUPERIORES EN ANTROPOLOG?A SOCIAL (CIESAS), MEXICO CITY, MEXICO; UNIVERSIDAD DE LA SABANA, CHIA, COLOMBIA; INSTITUTO DE FILOSOFIA, UNIVERSIDAD AUSTRAL, BUENOS AIRES, ARGENTINA; IAE BUSINESS…		10.1111/josi.12523	ARTICLE	ARGENTINA; BRAZIL; COLOMBIA; MEXICO [NORTH AMERICA]; CHILD HEALTH; COVID-19; FAMILY STRUCTURE; MATERNAL HEALTH; MENTAL DISORDER; MENTAL HEALTH; PHYSICAL ACTIVITY; SOCIOECONOMIC CONDITIONS	J SOC ISSUES	J. SOC. ISSUES	ENGLISH	JOHN WILEY AND SONS INC	2024	A. BEN BRIK; EDUCATION CITY, COLLEGE OF PUBLIC POLICY, HAMAD BIN KHALIFA UNIVERSITY, AR-RAYYAN, QATAR; EMAIL: ABRIK@HBKU.EDU.QA	224537	JOURNAL OF SOCIAL ISSUES	22	PARENTAL MENTAL HEALTH AND CHILD ANXIETY DURING THE COVID19 PANDEMIC IN LATIN AMERICA	80	ISI	KHALIFA UNIVERSITY;UNIVERSITYÃ¿OFÃ¿NEBRASKA?LINCOLN;CENTRO DE INVESTIGACIONES Y ESTUDIOS SUPERIORES EN ANTROPOLOG?A SOCIAL (CIESAS);UNIVERSIDAD DE LA SABANA;UNIVERSIDAD AUSTRAL;UNIVERSIDAD AUSTRAL;UNIVERSIDADE NOVE DE JULHO;OBSERVATORIO REGIONAL DE AMERICA LATINA Y EL CARIBE;BRIGHAM YOUNG UNIVERSITY	NOTREPORTED;HAMAD BIN KHALIFA UNIVERSITY;NOTREPORTED	BEN BRIK A, 2024, J SOC ISSUES	BEN BRIK A, 2024, J SOC ISSUES
CLARKE J	none	IN THE UK IN 2007 A NATIONAL EXPERIMENT WAS INITIATED WITH THE AIM OF TACKLING ?BRITAIN'S BIGGEST SOCIAL PROBLEM??DEPRESSION. IMPROVING ACCESS TO PSYCHOLOGICAL THERAPIES (IAPT) WAS DEVISED AS THE SOLUTION. A UNIVERSAL FREE-TO-ACCESS TALKING THERAPIES PROGRAM WOULD MAKE AVAILABLE EVIDENCE-BASED TREATMENT TO ALL ADULTS WITH DEPRESSION. NICE (NATIONAL INSTITUTE FOR HEALTH AND CARE EXCELLENCE), THE B…	ASSOCIATION FOR PSYCHOANALYTIC PSYCHOTHERAPY IN THE PUBLIC SECTOR, LONDON, UNITED KINGDOM; CENTRE FOR PHILOSOPHY OF NATURAL AND SOCIAL SCIENCES, LSE, LONDON, UNITED KINGDOM; ALBANY TRUST, LONDON, UNITED KINGDOM	DYNAMIC INTERPERSONAL THERAPY; EVIDENCE-BASED PRACTICE; STREET-LEVEL BUREAUCRATS; UNIVERSAL PSYCHOTHERAPY	10.1002/aps.1848	ARTICLE		INT J APPL PSYCHOANAL STUD	INT. J. APPL. PSYCHOANAL. STUD.	ENGLISH	JOHN WILEY AND SONS LTD	2023	J. CLARKE; ASSOCIATION FOR PSYCHOANALYTIC PSYCHOTHERAPY IN THE PUBLIC SECTOR, LONDON, UNITED KINGDOM; EMAIL: JEREMYCLARKEALBANYTRUST@GMAIL.COM	17423341	INTERNATIONAL JOURNAL OF APPLIED PSYCHOANALYTIC STUDIES	0	A NEW DEAL FOR DYNAMIC PSYCHOTHERAPIES THE PSYCHOANALYST AS STREETLEVEL BUREAUCRAT	20	ISI	ASSOCIATION FOR PSYCHOANALYTIC PSYCHOTHERAPY IN THE PUBLIC SECTOR;CENTRE FOR PHILOSOPHY OF NATURAL AND SOCIAL SCIENCES	NOTREPORTED;ASSOCIATION FOR PSYCHOANALYTIC PSYCHOTHERAPY IN THE PUBLIC SECTOR;NOTREPORTED	CLARKE J, 2023, INT J APPL PSYCHOANAL STUD	CLARKE J, 2023, INT J APPL PSYCHOANAL STUD
DO M;PHAM A;NGUYEN L;NGUYEN T;LE N;TRAN H	none	AIM: THE PREVALENCE OF NON-SMALL CELL LUNG CANCER (NSCLC) IS INCREASING GLOBALLY. THIS IS THE FIRST STUDY TO EVALUATE THE EFFECTIVENESS OF GROUP-BASED PSYCHOTHERAPY IN NSCLC PATIENTS WITH DEPRESSION IN VIETNAM DURING THE COVID-19 PANDEMIC. METHODS: A NON-RANDOMIZED CONTROLLED INTERVENTION STUDY WAS CONDUCTED ON 40 DEPRESSED ADULT PATIENTS WITH NSCLC AT THE VIETNAM NATIONAL CANCER HOSPITAL (VNCH) …	VIETNAM NATIONAL CANCER HOSPITAL, HANOI, 10000, VIET NAM; HANOI MEDICAL UNIVERSITY, HANOI, 10000, VIET NAM; BASIC NEEDS VIETNAM, HUNG YEN, 16000, VIET NAM; HANOI-AMSTERDAM HIGH SCHOOL, HANOI, 10000, VIET NAM	DEPRESSION; GROUP-BASED PSYCHOTHERAPY; NON-SMALL CELL LUNG CANCER; NON-SPECIALIST; TASK-SHIFTING; VIETNAM	10.1016/j.jbct.2024.100501	ARTICLE		J BEHAV COGNIT THERAPY	J. BEHAV. COGNIT. THERAPY	ENGLISH	ELSEVIER MASSON S.R.L.	2024	A.T. PHAM; VIETNAM NATIONAL CANCER HOSPITAL, HANOI, 10000, VIET NAM; EMAIL: PHAMTUANANH@HMU.EDU.VN	26663473	JOURNAL OF BEHAVIORAL AND COGNITIVE THERAPY	0	PILOT IMPLEMENTATION OF GROUPBASED PSYCHOTHERAPY LED BY NONSPECIALISTS FOR LUNG CANCER PATIENTS WITH DEPRESSION AT VIETNAM NATIONAL CANCER HOSPITAL	34	ISI	VIETNAM NATIONAL CANCER HOSPITAL;HANOI MEDICAL UNIVERSITY;HANOI-AMSTERDAM HIGH SCHOOL	NOTREPORTED;VIETNAM NATIONAL CANCER HOSPITAL;NOTREPORTED	DO MT, 2024, J BEHAV COGNIT THERAPY	DO MT, 2024, J BEHAV COGNIT THERAPY
DHAMALA E;RICARD J;UDDIN L;GALEA L;JACOBS E;YIP S;YEO B;CHAKRAVARTY M;HOLMES A	none	CONSIDERABLE HETEROGENEITY EXISTS IN THE EXPRESSION OF COMPLEX HUMAN BEHAVIORS ACROSS THE COGNITIVE, PERSONALITY AND MENTAL HEALTH DOMAINS. IT IS INCREASINGLY EVIDENT THAT INDIVIDUAL VARIABILITY IN BEHAVIORAL EXPRESSION IS SUBSTANTIALLY AFFECTED BY SOCIODEMOGRAPHIC FACTORS THAT OFTEN INTERACT WITH LIFE EXPERIENCES. HERE, WE FORMALLY ADDRESS THE URGENT NEED TO INCORPORATE INTERSECTIONAL IDENTITIES…	FEINSTEIN INSTITUTES FOR MEDICAL RESEARCH, MANHASSET, NY, UNITED STATES; STANFORD UNIVERSITY SCHOOL OF MEDICINE, STANFORD, CA, UNITED STATES; UNIVERSITY OF CALIFORNIA, LOS ANGELES, LOS ANGELES, CA, UNITED STATES; CENTRE FOR ADDICTION AND MENTAL HEALTH, TORONTO, ON, CANADA; UNIVERSITY OF CALIFORNIA, SANTA BARBARA, SANTA BARBARA, CA, UNITED STATES; YALE SCHOOL OF MEDICINE, NEW HAVEN, CT, UNITED STA…		10.1038/s41593-024-01832-y	ARTICLE		NAT NEUROSCI	NAT. NEUROSCI.	ENGLISH	NATURE RESEARCH	2024	E. DHAMALA; FEINSTEIN INSTITUTES FOR MEDICAL RESEARCH, MANHASSET, UNITED STATES; EMAIL: ELVISHA@GMAIL.COM	10976256	NATURE NEUROSCIENCE	0	CONSIDERING THE INTERCONNECTED NATURE OF SOCIAL IDENTITIES IN NEUROIMAGING RESEARCH		ISI	FEINSTEIN INSTITUTES FOR MEDICAL RESEARCH;STANFORD UNIVERSITY SCHOOL OF MEDICINE;UNIVERSITY OF CALIFORNIA;CENTRE FOR ADDICTION AND MENTAL HEALTH;UNIVERSITY OF CALIFORNIA;YALE SCHOOL OF MEDICINE;NATIONAL UNIVERSITY OF SINGAPORE;MCGILL UNIVERSITY;CEREBRAL IMAGING CENTRE;RUTGERS UNIVERSITY	NOTREPORTED;FEINSTEIN INSTITUTES FOR MEDICAL RESEARCH;NOTREPORTED	DHAMALA E, 2024, NAT NEUROSCI	DHAMALA E, 2024, NAT NEUROSCI
BORG A;SAMMUT A;GRECH A;LAUTIER E;PRIEBE S;AZZOPARDI-MUSCAT N	none	MALTA HAS EMBARKED ON A RENEWED NATIONAL ENDEAVOUR TO REFORM THE MENTAL HEALTH SECTOR, PRIORITISING MENTAL HEALTH IN THE CONTEXT OF THE NATIONAL HEALTH STRATEGY POST 2020. PAST ATTEMPTS AT REFORMING THIS SECTOR WERE STIFLED DUE TO INSUFFICIENT AND UNSUSTAINED POLITICAL COMMITMENT, LEAVING IT DIRELY UNDER-RESOURCED. AN INTERPLAY OF FACTORS OVER RECENT YEARS HAS REKINDLED POLITICAL AND PUBLIC INTER…	DEPARTMENT FOR POLICY IN HEALTH, MINISTRY FOR HEALTH, VALLETTA, MALTA; MENTAL HEALTH SERVICES, MOUNT CARMEL HOSPITAL, ATTARD, MALTA; OFFICE OF THE SUPERINTENDENCE OF PUBLIC HEALTH, ST LUKE'S HOSPITAL, PIETA', MALTA; UNIT FOR SOCIAL AND COMMUNITY PSYCHIATRY, QUEEN MARY UNIVERSITY OF LONDON, LONDON, UNITED KINGDOM; DEPARTMENT OF HEALTH SERVICES MANAGEMENT, FACULTY OF HEALTH SCIENCES, UNIVERSITY OF …	HEALTH CARE REFORM; MALTA; MENTAL HEALTH; POLICY DEVELOPMENT	10.1016/j.healthpol.2022.06.001	ARTICLE	HUMANS; MALTA; MENTAL DISORDERS; MENTAL HEALTH; SOCIOECONOMIC FACTORS; ARTICLE; GOVERNMENT; HEALTH CARE POLICY; HEALTH PROMOTION; HUMAN; INVESTMENT; LEADERSHIP; MALTA; MENTAL DISEASE; MENTAL HEALTH; NON-GOVERNMENTAL ORGANIZATION; PREVENTION STUDY; PSYCHOLOGICAL WELL-BEING; PUBLIC HEALTH; SOCIOECONOMICS; STRATEGIC PLANNING; TREND STUDY; MENTAL DISEASE; SOCIOECONOMICS	HEALTH POLICY	HEALTH POLICY	ENGLISH	ELSEVIER IRELAND LTD	2022	A. BORG; DEPARTMENT FOR POLICY IN HEALTH, MINISTRY FOR HEALTH, VALLETTA, MALTA; EMAIL: ANNALISE.E.BORG@GOV.MT	1688510	HEALTH POLICY	1	DEVELOPING THE 20202030 MENTAL HEALTH STRATEGY FOR MALTA ADDRESSING THE NEEDS OF A SMALL ISLAND STATE UNDERGOING RAPID SOCIOECONOMIC TRANSITION	126	ISI	DEPARTMENT FOR POLICY IN HEALTH;MOUNT CARMEL HOSPITAL;ST LUKE'S HOSPITAL;QUEEN MARY UNIVERSITY OF LONDON;UNIVERSITY OF MALTA;UNIVERSITY OF MALTA	NOTREPORTED;DEPARTMENT FOR POLICY IN HEALTH;NOTREPORTED	BORG A, 2022, HEALTH POLICY	BORG A, 2022, HEALTH POLICY
MCNAB S;DRYER S;FITZGERALD L;GOMEZ P;BHATTI A;KENYI E;SOMJI A;KHADKA N;STALLS S	none	BACKGROUND: MENTAL HEALTH HAS LONG FALLEN BEHIND PHYSICAL HEALTH IN ATTENTION, FUNDING, AND ACTION?ESPECIALLY IN LOW- AND MIDDLE-INCOME COUNTRIES (LMICS). IT HAS BEEN CONSPICUOUSLY ABSENT FROM GLOBAL REPRODUCTIVE, MATERNAL, NEWBORN, CHILD, AND ADOLESCENT HEALTH (MNCAH) PROGRAMMING, DESPITE INCREASING AWARENESS OF THE INTERGENERATIONAL IMPACT OF COMMON PERINATAL MENTAL DISORDERS (CPMDS). HOWEVER, …	MOMENTUM COUNTRY AND GLOBAL LEADERSHIP, WASHINGTON, DC, UNITED STATES	CHILD HEALTH; COMMON PERINATAL MENTAL DISORDERS; MATERNAL HEALTH; MATERNAL MENTAL HEALTH; PERINATAL MENTAL HEALTH; SOCIAL DETERMINANTS	10.1186/s12884-022-04589-z	ARTICLE	ADOLESCENT; CHILD; COVID-19; DEVELOPING COUNTRIES; FEMALE; HUMANS; INFANT; NEWBORN; INFANT; NEWBORN; DISEASES; MENTAL DISORDERS; MENTAL HEALTH; PARTURITION; PREGNANCY; ARTICLE; COMMON PERINATAL MENTAL DISORDER; ECONOMIC INEQUALITY; GENDER BASED VIOLENCE; GENDER INEQUALITY; GLOBAL DISEASE BURDEN; HUMAN; KNOWLEDGE; LANDSCAPE ANALYSIS; LOW INCOME COUNTRY; MATERNAL CARE; MENTAL DISEASE; MENTAL HEALTH…	BMC PREGNANCY CHILDBIRTH	BMC PREGNANCY CHILDBIRTH	ENGLISH	BIOMED CENTRAL LTD	2022	S.E. MCNAB; MOMENTUM COUNTRY AND GLOBAL LEADERSHIP, WASHINGTON, UNITED STATES; EMAIL: MCNABSHANON@GMAIL.COM	14712393	BMC PREGNANCY AND CHILDBIRTH	24	THE SILENT BURDEN A LANDSCAPE ANALYSIS OF COMMON PERINATAL MENTAL DISORDERS IN LOW AND MIDDLEINCOME COUNTRIES	22	ISI		NOTREPORTED;NOTREPORTED;NOTREPORTED	MCNAB SE, 2022, BMC PREGNANCY CHILDBIRTH	MCNAB SE, 2022, BMC PREGNANCY CHILDBIRTH
ZHONG Y;CHEN Y;SU X;WANG M;LI Q;SHAO Z;SUN L	none	METHODS THE DATA ANALYSED IN THIS STUDY WERE FROM THE GLOBAL BURDEN OF DISEASES 2019. THE NUMBERS, RATES PER 100 000 POPULATION, AVERAGE ANNUAL PERCENTAGE CHANGES (AAPCS) OF INCIDENCE, PREVALENCE AND YEARS LIVED WITH DISABILITY (YLDS) OF BIPOLAR DISORDER ARE REPORTED AT THE GLOBAL, REGIONAL AND NATIONAL LEVELS AMONG INDIVIDUALS AGED 10?24 YEARS. GLOBAL TRENDS BY AGE, SEX AND SOCIAL DEVELOPMENT IN…	CENTRE FOR HEALTH MANAGEMENT AND POLICY RESEARCH, SCHOOL OF PUBLIC HEALTH, CHEELOO COLLEGE OF MEDICINE, SHANDONG UNIVERSITY, SHANDONG, JINAN, CHINA; NATIONAL HEALTH COMMISSION OF CHINA (NHC) KEY LABORATORY OF HEALTH ECONOMICS AND POLICY RESEARCH, SHANDONG UNIVERSITY, SHANDONG, JINAN, CHINA; INSTITUTE OF HEALTH AND ELDERLY CARE, SHANDONG UNIVERSITY, SHANDONG, JINAN, CHINA		10.1136/gpsych-2023-101255	ARTICLE	ADOLESCENT; ADULT; ARTICLE; BIPOLAR DISORDER; CHILD; DISABILITY; DISEASE BURDEN; FEMALE; GENDER; GREENLAND; GROUPS BY AGE; HUMAN; INCIDENCE; MAJOR CLINICAL STUDY; MALE; PREVALENCE; SCHOOL CHILD; SOUTH AND CENTRAL AMERICA; TREND STUDY; YOUNG ADULT	GENERAL PSYCHIATRY	GENERAL PSYCHIATRY	ENGLISH	BMJ PUBLISHING GROUP	2024	L. SUN; CENTRE FOR HEALTH MANAGEMENT AND POLICY RESEARCH, SCHOOL OF PUBLIC HEALTH, CHEELOO COLLEGE OF MEDICINE, SHANDONG UNIVERSITY, JINAN, SHANDONG, CHINA; EMAIL: SUNLONG@SDU.EDU.CN	2517729X	GENERAL PSYCHIATRY	11	GLOBAL REGIONAL AND NATIONAL BURDENS OF BIPOLAR DISORDERS IN ADOLESCENTS AND YOUNG ADULTS A TREND ANALYSIS FROM 1990 TO 2019	37	ISI	SHANDONG UNIVERSITY;SHANDONG UNIVERSITY;SHANDONG UNIVERSITY	NOTREPORTED;SHANDONG UNIVERSITY;NOTREPORTED	ZHONG Y, 2024, GENERAL PSYCHIATRY	ZHONG Y, 2024, GENERAL PSYCHIATRY
MALIK-SONI N;SHAKER A;LUCK H;MULLIN A;WILEY R;LEWIS M;FUENTES J;FRAZIER T	none	ABSTRACT: MOST INDIVIDUALS WITH AUTISM SPECTRUM DISORDER (ASD)?A COMPLEX, LIFE-LONG DEVELOPMENTAL DISORDER?DO NOT HAVE ACCESS TO THE CARE REQUIRED TO ADDRESS THEIR DIVERSE HEALTH NEEDS. HERE, WE REVIEW: (1) COMMON BARRIERS TO HEALTHCARE ACCESS (SHORTAGE/COST OF SERVICES; PHYSICIAN AWARENESS; STIGMA); (2) BARRIERS ENCOUNTERED PRIMARILY DURING CHILDHOOD (LIMITED SCREENING/DIAGNOSIS; UNCLEAR REFERRA…	SHIFT HEALTH, TORONTO, ON, CANADA; DEPARTMENT OF PATHOLOGY AND MOLECULAR MEDICINE, MCMASTER UNIVERSITY, HAMILTON, ON, CANADA; DEPARTMENT OF MEDICAL GENETICS, FACULTY OF MEDICINE, UNIVERSITY OF BRITISH COLUMBIA, VANCOUVER, BC, CANADA; AUTISM CANADA, TORONTO, ON, CANADA; CHILD AND ADOLESCENT PSYCHIATRY SERVICE, POLICL?NICA GIPUZKOA AND GAUTENA AUTISM SOCIETY, DONOSTIA/SAN SEBASTI?N, SPAIN; AUTISM S…		10.1038/s41390-021-01465-y	REVIEW	ADULT; AUTISM SPECTRUM DISORDER; AUTISTIC DISORDER; COMMUNICATION; HEALTH SERVICES ACCESSIBILITY; HUMANS; TRANSITION TO ADULT CARE; ADULTHOOD; AUTISM; COMORBIDITY; DEVELOPMENTAL DELAY; DEVELOPMENTAL DISORDER; DISTRICT OF COLUMBIA; GENETIC SCREENING; GOVERNMENT; GREY LITERATURE; HEALTH CARE; HEALTH CARE ACCESS; HEALTH CARE NEED; HEALTH SERVICE; HUMAN; MEDICAL CARE; MEDICAL EDUCATION; MEDICAL SUBJE…	PEDIATR RES	PEDIATR. RES.	ENGLISH	SPRINGER NATURE	2022	T.W. FRAZIER; AUTISM SPEAKS, NEW YORK, UNITED STATES; EMAIL: TFRAZIER@JCU.EDU	313998	PEDIATRIC RESEARCH	123	TACKLING HEALTHCARE ACCESS BARRIERS FOR INDIVIDUALS WITH AUTISM FROM DIAGNOSIS TO ADULTHOOD	91	ISI	SHIFT HEALTH;MCMASTER UNIVERSITY;UNIVERSITY OF BRITISH COLUMBIA	NOTREPORTED;NOTREPORTED;NOTREPORTED	MALIK-SONI N, 2022, PEDIATR RES	MALIK-SONI N, 2022, PEDIATR RES
XIE G;ZHOU W;XIAO S;WANG Y	none	BACKGROUND: UNDERSTANDING COMPONENTS AND PREDICTORS OF DELAY OF FIRST TREATMENT FOR MENTAL HEALTH PROBLEMS ARE CRUCIAL TO INFORM INTERVENTIONS FOR EARLIER TREATMENT. HOWEVER, CHINESE-CONTEXT KNOWLEDGE OF THIS THEME IS STILL LIMITED. METHODS: WE CONDUCTED AN INPATIENT SURVEY AMONG 206 PATIENTS WITH VARIOUS MENTAL DISORDERS IN CHINA. DELAY OF FIRST UTILIZATION OF MENTAL HEALTHCARE (DELAY-TOTAL) AND…	XIANGYA SCHOOL OF PUBLIC HEALTH, CENTRAL SOUTH UNIVERSITY, HUNAN, CHANGSHA, CHINA; RESEARCH CENTER FOR PUBLIC HEALTH AND SOCIAL SECURITY, SCHOOL OF PUBLIC ADMINISTRATION, HUNAN UNIVERSITY, HUNAN, CHANGSHA, CHINA; NATIONAL CLINICAL RESEARCH CENTER FOR MENTAL DISORDERS AND DEPARTMENT OF PSYCHIATRY, THE SECOND XIANGYA HOSPITAL OF CENTRAL SOUTH UNIVERSITY, HUNAN, CHANGSHA, CHINA; XIANGYA SCHOOL OF NU…	CHINA; DELAY OF FIRST TREATMENT; MENTAL DISORDERS	10.1177/00207640231166632	ARTICLE	CHINA; DELIVERY OF HEALTH CARE; HOSPITALS; HUMANS; MENTAL DISORDERS; MENTAL HEALTH; MENTAL HEALTH SERVICES; CHINA; HEALTH CARE DELIVERY; HOSPITAL; HUMAN; MENTAL DISEASE; MENTAL HEALTH; MENTAL HEALTH SERVICE	INT J SOC PSYCHIATRY	INT. J. SOC. PSYCHIATRY	ENGLISH	SAGE PUBLICATIONS LTD	2023	W. ZHOU; RESEARCH CENTER FOR PUBLIC HEALTH AND SOCIAL SECURITY, SCHOOL OF PUBLIC ADMINISTRATION, HUNAN UNIVERSITY, CHANGSHA, HUNAN, CHINA; EMAIL: WEIZHOU86@163.COM	207640	INTERNATIONAL JOURNAL OF SOCIAL PSYCHIATRY	0	UNDERSTANDING COMPONENTS AND PREDICTORS OF DELAY OF FIRST TREATMENT FOR MENTAL HEALTH PROBLEMS A HOSPITALBASED STUDY IN CHINA	69	ISI	CENTRAL SOUTH UNIVERSITY;HUNAN UNIVERSITY;THE SECOND XIANGYA HOSPITAL OF CENTRAL SOUTH UNIVERSITY;CENTRAL SOUTH UNIVERSITY	NOTREPORTED;HUNAN UNIVERSITY;NOTREPORTED	XIE G, 2023, INT J SOC PSYCHIATRY	XIE G, 2023, INT J SOC PSYCHIATRY
JUMBE S;NYALI J;SIMBEYE M;ZAKEYU N;MOTSHEWA G;PULAPA S	none	PURPOSE THERE IS LIMITED KNOWLEDGE ON HOW TO TACKLE MENTAL HEALTH PROBLEMS AMONG YOUTH IN AFRICA. LITERATURE DESCRIBING COMMUNITY ENGAGEMENT (CE) APPROACHES IN LOW/MIDDLE-INCOME COUNTRIES (LMICS) HEALTH RESEARCH IS SPARSE. CE WITH YOUTH FROM LMICS CAN HELP STEER AND SHAPE CULTURALLY RELEVANT INTERVENTIONS FOR STIGMATISED TOPICS LIKE MENTAL HEALTH, RESULTING IN BETTER HEALTHCARE EXPERIENCES. WE SH…	CENTRE FOR EVALUATION AND METHODS, WOLFSON INSTITUTE OF POPULATION HEALTH, QUEEN MARY UNIVERSITY OF LONDON, LONDON, UNITED KINGDOM; MILLENNIUM UNIVERSITY, BLANTYRE, MALAWI; THE NATIONAL YOUTH COUNCIL OF MALAWI, LILONGWE, MALAWI; DRUG FIGHT MALAWI, LILONGWE, MALAWI		10.1371/journal.pone.0265530	ARTICLE	ADOLESCENT; FOCUS GROUPS; HEALTH LITERACY; HUMANS; MALAWI; MENTAL HEALTH; POVERTY; ACCESS TO INFORMATION; ADDICTION; ADULT; ARTICLE; COMMUNITY DYNAMICS; COMMUNITY PARTICIPATION; CORONAVIRUS DISEASE 2019; CULTURAL SENSITIVITY; DEPRESSION; FAMILY RELATION; FEMALE; FINANCIAL STRESS; HEALTH LITERACY; HEALTH WORKFORCE; HUMAN; HUMAN IMMUNODEFICIENCY VIRUS INFECTION; MALAWIAN; MALE; MENTAL DISEASE; MENT…	PLOS ONE	PLOS ONE	ENGLISH	PUBLIC LIBRARY OF SCIENCE	2022	S. JUMBE; CENTRE FOR EVALUATION AND METHODS, WOLFSON INSTITUTE OF POPULATION HEALTH, QUEEN MARY UNIVERSITY OF LONDON, LONDON, UNITED KINGDOM; EMAIL: S.JUMBE@QMUL.AC.UK	19326203	PLOS ONE	14	WE DO NOT TALK ABOUT IT ENGAGING YOUTH IN MALAWI TO INFORM ADAPTATION OF A MENTAL HEALTH LITERACY INTERVENTION	17	ISI	QUEEN MARY UNIVERSITY OF LONDON;MILLENNIUM UNIVERSITY;THE NATIONAL YOUTH COUNCIL OF MALAWI	NOTREPORTED;QUEEN MARY UNIVERSITY OF LONDON;NOTREPORTED	JUMBE S, 2022, PLOS ONE	JUMBE S, 2022, PLOS ONE
HYNEK K;HOLLANDER A;LIEFBROER A;HAUGE L;STRAITON M	none	BACKGROUND: WOMEN, AND MIGRANT WOMEN IN PARTICULAR, ARE AT INCREASED RISK OF MANY COMMON MENTAL DISORDERS, WHICH MAY POTENTIALLY IMPACT THEIR LABOR MARKET PARTICIPATION AND THEIR WORK-RELATED INCOME. PREVIOUS RESEARCH FOUND THAT MENTAL DISORDERS ARE ASSOCIATED WITH SEVERAL WORK-RELATED OUTCOMES SUCH AS LOSS OF INCOME, HOWEVER, NOT MUCH IS KNOWN ABOUT HOW THIS VARIES WITH MIGRANT BACKGROUND. THIS …	DEPARTMENT OF MENTAL HEALTH AND SUICIDE, NORWEGIAN INSTITUTE OF PUBLIC HEALTH, OSLO, NORWAY; FACULTY OF HEALTH SCIENCES, OSLO METROPOLITAN UNIVERSITY, OSLO, NORWAY; DEPARTMENT OF GLOBAL PUBLIC HEALTH, KAROLINKSA INSTITUTET, STOCKHOLM, SWEDEN; NETHERLANDS INTERDISCIPLINARY DEMOGRAPHIC INSTITUTE, THE HAGUE, NETHERLANDS; DEPARTMENT OF EPIDEMIOLOGY, UNIVERSITY MEDICAL CENTRE GRONINGEN, UNIVERSITY OF …	EARLY ADULTHOOD; INCOME; MENTAL DISORDER; MIGRANT WOMEN; NATIONAL REGISTER DATA; OUTPATIENT MENTAL HEALTH CARE	10.3389/fpubh.2021.736624	ARTICLE	ADULT; COVID-19; FEMALE; HUMANS; MENTAL DISORDERS; MENTAL HEALTH; NORWAY; TRANSIENTS AND MIGRANTS; YOUNG ADULT; ADULT; FEMALE; HUMAN; MENTAL DISEASE; MENTAL HEALTH; MIGRATION; NORWAY; YOUNG ADULT	FRONT PUBLIC HEALTH	FRONT. PUBLIC HEALTH	ENGLISH	FRONTIERS MEDIA S.A.	2022	K.A. HYNEK; DEPARTMENT OF MENTAL HEALTH AND SUICIDE, NORWEGIAN INSTITUTE OF PUBLIC HEALTH, OSLO, NORWAY; EMAIL: KAMILAANGELIKA.HYNEK@FHI.NO	22962565	FRONTIERS IN PUBLIC HEALTH	5	CHANGE IN WORKRELATED INCOME FOLLOWING THE UPTAKE OF TREATMENT FOR MENTAL DISORDERS AMONG YOUNG MIGRANT AND NONMIGRANT WOMEN IN NORWAY A NATIONAL REGISTER STUDY	9	ISI	NORWEGIAN INSTITUTE OF PUBLIC HEALTH;OSLO METROPOLITAN UNIVERSITY;KAROLINKSA INSTITUTET;NETHERLANDS INTERDISCIPLINARY DEMOGRAPHIC INSTITUTE;UNIVERSITY MEDICAL CENTRE GRONINGEN;VRIJE UNIVERSITEIT AMSTERDAM	NOTREPORTED;NORWEGIAN INSTITUTE OF PUBLIC HEALTH;NOTREPORTED	HYNEK KA, 2022, FRONT PUBLIC HEALTH	HYNEK KA, 2022, FRONT PUBLIC HEALTH
GOLDSMITH L;ANDERSON K;CLARKE G;CROWE C;JARMAN H;JOHNSON S;LOMANI J;MCDAID D;PARK A;SMITH J;GILLARD S	none	BACKGROUND: INTERNATIONALLY, HOSPITAL-BASED SHORT-STAY CRISIS UNITS HAVE BEEN INTRODUCED TO PROVIDE A SAFE SPACE FOR STABILISATION AND FURTHER ASSESSMENT FOR THOSE IN PSYCHIATRIC CRISIS. THE UNITS TYPICALLY AIM TO REDUCE INPATIENT ADMISSIONS AND PSYCHIATRIC PRESENTATIONS TO EMERGENCY DEPARTMENTS. AIMS: TO ASSESS CHANGES TO SERVICE USE FOLLOWING A SERVICE USER?S FIRST VISIT TO A UNIT, CHARACTERISE…	POPULATION HEALTH RESEARCH INSTITUTE, ST GEORGE?S, UNIVERSITY OF LONDON, UNITED KINGDOM; MIDDLESEX UNIVERSITY LONDON, UNITED KINGDOM; THE HEALTH FOUNDATION, LONDON, UNITED KINGDOM; NORTH EAST LONDON NHS FOUNDATION TRUST, GOODMAYES HOSPITAL, ILFORD, UNITED KINGDOM; ST GEORGE?S UNIVERSITY HOSPITALS NHS FOUNDATION TRUST, LONDON, UNITED KINGDOM; NIHR MENTAL HEALTH POLICY RESEARCH UNIT, DIVISION OF PS…	EMERGENCY DEPARTMENT; EXPERIENCE OF CARE; MENTAL HEALTH CRISIS; MENTAL HEALTH NURSING; PSYCHIATRIC ADMISSION; SHORT-STAY CRISIS CARE	10.1177/00207640221142530	ARTICLE	AFTERCARE; CITIES; COHORT STUDIES; COVID-19; EMERGENCY SERVICES; PSYCHIATRIC; ENGLAND; HUMANS; MENTAL DISORDERS; PANDEMICS; PATIENT DISCHARGE; PROSPECTIVE STUDIES; REFERRAL AND CONSULTATION; AFTERCARE; CITY; COHORT ANALYSIS; CORONAVIRUS DISEASE 2019; ENGLAND; HOSPITAL DISCHARGE; HUMAN; MENTAL DISEASE; PANDEMIC; PATIENT REFERRAL; PROSPECTIVE STUDY; PSYCHIATRIC EMERGENCY SERVICE; PSYCHOLOGY	INT J SOC PSYCHIATRY	INT. J. SOC. PSYCHIATRY	ENGLISH	SAGE PUBLICATIONS LTD	2023	L.P. GOLDSMITH; POPULATION HEALTH RESEARCH INSTITUTE, ST GEORGE?S, UNIVERSITY OF LONDON, UNITED KINGDOM; EMAIL: LGOLDSMI@SGUL.AC.UK	207640	INTERNATIONAL JOURNAL OF SOCIAL PSYCHIATRY	1	SERVICE USE PRECEDING AND FOLLOWING FIRST REFERRAL FOR PSYCHIATRIC EMERGENCY CARE AT A SHORTSTAY CRISIS UNIT A COHORT STUDY ACROSS THREE CITIES AND ONE RURAL AREA IN ENGLAND	69	ISI	UNIVERSITY OF LONDON;MIDDLESEX UNIVERSITY LONDON;THE HEALTH FOUNDATION;GOODMAYES HOSPITAL;ST GEORGE?S UNIVERSITY HOSPITALS NHS FOUNDATION TRUST;UNIVERSITY COLLEGE LONDON ? BLOOMSBURY;LONDON SCHOOL OF ECONOMICS AND POLITICAL SCIENCE;CITY UNIVERSITY OF LONDON	NOTREPORTED;UNIVERSITY OF LONDON;NOTREPORTED	GOLDSMITH LP, 2023, INT J SOC PSYCHIATRY	GOLDSMITH LP, 2023, INT J SOC PSYCHIATRY
LEVANTE A;QUARTA S;MASSARO M;CALABRISO N;CARLUCCIO M;DAMIANO F;POLLICE F;SICULELLA L;LECCISO F	none	BACKGROUND: PSYCHOLOGICAL DISTRESS IS RECOGNISED AS THE MOST COMMON MENTAL HEALTH DIFFICULTY IN EMERGING ADULT (18-TO-24-YEAR-OLD) FEMALE ACADEMIC STUDENTS. THIS STUDY AIMED TO TEST A NOVEL MODEL POSITING PHYSICAL ACTIVITY HABITS AS A PROTECTIVE FACTOR FOR PSYCHOLOGICAL DISTRESS THROUGH THE MEDIATING ROLE OF PHYSICAL AND PSYCHOLOGICAL PARAMETERS. ADHERENCE TO THE MEDITERRANEAN DIET AND SELF-REPOR…	DEPARTMENT OF HUMAN AND SOCIAL SCIENCES, UNIVERSITY OF SALENTO, VIA DI VALESIO, LECCE, 73100, ITALY; LAB OF APPLIED PSYCHOLOGY, DEPARTMENT OF HUMAN AND SOCIAL SCIENCES, UNIVERSITY OF SALENTO, VIA DI VALESIO, LECCE, 73100, ITALY; DEPARTMENT OF BIOLOGICAL AND ENVIRONMENTAL SCIENCES AND TECHNOLOGIES (DISTEBA), UNIVERSITY OF SALENTO, LECCE, 73100, ITALY; INSTITUTE OF CLINICAL PHYSIOLOGY (IFC), NATION…		10.1016/j.heliyon.2024.e26626	ARTICLE		HELIYON	HELIYON	ENGLISH	ELSEVIER LTD	2024	A. LEVANTE; DEPARTMENT OF HUMAN AND SOCIAL SCIENCES, UNIVERSITY OF SALENTO, LECCE, VIA DI VALESIO, 73100, ITALY; EMAIL: ANNALISA.LEVANTE@UNISALENTO.IT	24058440	HELIYON	7	PHYSICAL ACTIVITY HABITS PREVENT PSYCHOLOGICAL DISTRESS IN FEMALE ACADEMIC STUDENTS THE MULTIPLE MEDIATING ROLE OF PHYSICAL AND PSYCHOSOCIAL PARAMETERS	10	ISI	UNIVERSITY OF SALENTO;UNIVERSITY OF SALENTO;UNIVERSITY OF SALENTO;INSTITUTE OF CLINICAL PHYSIOLOGY (IFC)	NOTREPORTED;UNIVERSITY OF SALENTO;NOTREPORTED	LEVANTE A, 2024, HELIYON	LEVANTE A, 2024, HELIYON
LEAR-CLAVERAS A;AGUILAR-LATORRE A;OLIV?N-BL?ZQUEZ B;COUSO-VIANA S;CLAVER?A-FONT?N A	none	BACKGROUND: THE CORONAVIRUS DISEASE (COVID-19) PANDEMIC HAS HAD A HUGE IMPACT ON THE PSYCHOLOGICAL WELLBEING OF THE POPULATION, HOWEVER, FEW STUDIES HAVE ANALYSED THE PSYCHOLOGICAL CONSEQUENCES FOR THE MOST VULNERABLE GROUPS, PARTICULARLY THOSE SUFFERING FROM DEPRESSION AND ANXIETY, AND SPECIFICALLY IN MEN. THE OBJECTIVE OF THIS STUDY IS TO ANALYSE THE CHANGES IN A POPULATION OF MEN UNDERGOING AC…	ARAGONESE PRIMARY CARE RESEARCH GROUP (GAIAP B21_20R), INSTITUTE FOR HEALTH RESEARCH ARAG?N (IIS ARAG?N), ZARAGOZA, 50009, SPAIN; DEPARTMENT OF PSYCHOLOGY AND SOCIOLOGY, UNIVERSITY OF ZARAGOZA, ZARAGOZA, 50009, SPAIN; NETWORK FOR RESEARCH ON CHRONICITY, PRIMARY CARE AND HEALTH PROMOTION (RICAPPS), BARCELONA, 08007, SPAIN; I-SA?DE GROUP, SOUTH GALICIA HEALTH RESEARCH INSTITUTE, VIGO, 36201, SPAIN;…	ANTIDEPRESSANT; ANXIETY; ANXIOLYTIC; COVID-19 PANDEMIC; DEPRESSION; DRUG CONSUMPTION; MEN; USE OF HEALTHCARE RESOURCES	10.31083/j.jomh1809182	ARTICLE	ALPRAZOLAM; AMITRIPTYLINE; ANTIDEPRESSANT AGENT; ANXIOLYTIC AGENT; BENTAZEPAM; BROMAZEPAM; BROTIZOLAM; CITALOPRAM; CLOBAZAM; CLOMIPRAMINE; CLORAZEPATE POTASSIUM; DIAZEPAM; DOXEPIN; ESCITALOPRAM; FLUOXETINE; FLURAZEPAM; FLUVOXAMINE; IMIPRAMINE; KETAZOLAM; LOPRAZOLAM; LORAZEPAM; LORMETAZEPAM; MAPROTILINE; MIDAZOLAM; NORTRIPTYLINE; PAROXETINE; PINAZEPAM; QUAZEPAM; SERTRALINE; TRIAZOLAM; TRIMIPRAMINE…	J MEN'S HEALTH	J. MEN'S HEALTH	ENGLISH	IMR PRESS LIMITED	2022	B. OLIV?N-BL?ZQUEZ; ARAGONESE PRIMARY CARE RESEARCH GROUP (GAIAP B21_20R), INSTITUTE FOR HEALTH RESEARCH ARAG?N (IIS ARAG?N), ZARAGOZA, 50009, SPAIN; EMAIL: BOLIVAN@UNIZAR.ES	18756867	JOURNAL OF MEN'S HEALTH	0	EVOLUTION OF ANXIETY AND DEPRESSION IN MEN DURING THE FIRST SIX MONTHS OF THE COVID19 PANDEMIC AND FACTORS ASSOCIATED WITH WORSENING OF MENTAL HEALTH RETROSPECTIVE LONGITUDINAL STUDY	18	ISI	ZARAGOZA;UNIVERSITY OF ZARAGOZA;NETWORK FOR RESEARCH ON CHRONICITY;SOUTH GALICIA HEALTH RESEARCH INSTITUTE;VIGO HEALTH AREA	NOTREPORTED;INSTITUTE FOR HEALTH RESEARCH ARAG?N (IIS ARAG?N);NOTREPORTED	LEAR-CLAVERAS A, 2022, J MEN'S HEALTH	LEAR-CLAVERAS A, 2022, J MEN'S HEALTH
KHALID A;HAQQANI S;WILLIAMS C	none	THERE IS LIMITED EVIDENCE ON THE EFFICACY OF COGNITIVE BEHAVIORAL THERAPY (CBT) BASED GUIDED SELF-HELP PROGRAMS TO IMPROVE LOW MOOD AND ANXIETY IN PAKISTANI ADOLESCENTS. THE AIMS OF THE CURRENT STUDY WERE TO ASSESS THE EFFECTIVENESS OF AN EIGHT WEEK LOW INTENSITY CBT-BASED GUIDED SELF-HELP PROGRAM, LIVING LIFE TO THE FULL (LLTTF) ON DEPRESSION, ANXIETY AND SOCIAL FUNCTIONING AMONG SECONDARY SCHOO…	OFFICE NO M27-146, DEPARTMENT OF FAMILY, COMMUNITY MEDICINE AND BEHAVIORAL SCIENCES, COLLEGE OF MEDICINE, UNIVERSITY OF SHARJAH, UNITED ARAB EMIRATES; ASSISTANT PROFESSOR/ HEAD OF THE DEPARTMENT OF PSYCHOLOGY, CAPITAL UNIVERSITY OF SCIENCES AND TECHNOLOGY (PREVIOUSLY AFFILIATED WITH FATIMA JINNAH WOMEN UNIVERSITY), PAKISTAN; HONORARY SENIOR RESEARCH FELLOW (INSTITUTE OF HEALTH & WELLBEING), UNIVE…	ADOLESCENTS; ANXIETY; COGNITIVE BEHAVIORAL THERAPY; DEPRESSION; GUIDED SELF-HELP; INTERVENTION	10.1016/j.heliyon.2022.e09809	ARTICLE		HELIYON	HELIYON	ENGLISH	ELSEVIER LTD	2022	A. KHALID; OFFICE NO M27-146, DEPARTMENT OF FAMILY, COMMUNITY MEDICINE AND BEHAVIORAL SCIENCES, COLLEGE OF MEDICINE, UNIVERSITY OF SHARJAH, UNITED ARAB EMIRATES; EMAIL: AKHALID@SHARJAH.AC.AE	24058440	HELIYON	2	GUIDED SELFHELP URDU VERSION OF THE LIVING LIFE TO THE FULL INTERVENTION FOR SECONDARY SCHOOL ADOLESCENTS WITH LOW MOOD AND ANXIETY IN PAKISTAN A FEASIBILITY STUDY	8	ISI	UNITED ARAB EMIRATES;CAPITAL UNIVERSITY OF SCIENCES AND TECHNOLOGY (PREVIOUSLY AFFILIATED WITH FATIMA JINNAH WOMEN UNIVERSITY);UNIVERSITY OF GLASGOW	NOTREPORTED;UNIVERSITY OF SHARJAH;NOTREPORTED	KHALID A, 2022, HELIYON	KHALID A, 2022, HELIYON
KIRVIN-QUAMME A;KISSINGER J;QUINLAN L;MONTGOMERY R;CHERNENOK M;PIRNER M;PAJARITO S;RAPOPORT S;WICKS P;DARCY A;GREENE C;ROBINSON A	none	BACKGROUND THE ABILITY OF DIGITAL MENTAL HEALTH INTERVENTIONS (DMHIS) TO REDUCE MENTAL HEALTH DISPARITIES RELIES ON THE RECRUITMENT OF RESEARCH PARTICIPANTS WITH DIVERSE SOCIODEMOGRAPHIC AND SELF-IDENTITY CHARACTERISTICS. DESPITE ITS IMPORTANCE, SOCIODEMOGRAPHIC REPORTING IN RESEARCH IS OFTEN LIMITED, AND THE STATE OF REPORTING PRACTICES IN DMHI RESEARCH IN PARTICULAR HAS NOT BEEN COMPREHENSIVELY…	WOEBOT HEALTH, SAN FRANCISCO, CA, UNITED STATES; WICKS DIGITAL HEALTH, LTD, LICHFIELD, UNITED KINGDOM; TRANSLATIONAL RESEARCH INSTITUTE (TRI), UNIVERSITY OF ARKANSAS FOR MEDICAL SCIENCES, LITTLE ROCK, AR, UNITED STATES	HEALTH EQUITY; MENTAL HEALTH; RANDOMIZED CONTROLLED TRIAL; SYSTEMATIC REVIEW	10.1136/bmjopen-2023-078029	ARTICLE	CHILD; FEMALE; GENDER IDENTITY; HOUSING; HUMANS; MALE; MENTAL HEALTH; RESEARCH DESIGN; SEXUAL BEHAVIOR; ARTICLE; DISABILITY; ETHNICITY; GENDER AND SEX; HOUSING; HUMAN; INFORMATION PROCESSING; MENTAL HEALTH; RACE; RANDOMIZED CONTROLLED TRIAL (TOPIC); SCOPING REVIEW; SEXUAL ORIENTATION; SOCIODEMOGRAPHICS; VETERAN; CHILD; FEMALE; GENDER IDENTITY; MALE; METHODOLOGY; SEXUAL BEHAVIOR	BMJ OPEN	BMJ OPEN	ENGLISH	BMJ PUBLISHING GROUP	2024	A. ROBINSON; WOEBOT HEALTH, SAN FRANCISCO, UNITED STATES; EMAIL: ATHENA@WOEBOTHEALTH.COM	20446055	BMJ OPEN	1	COMMON PRACTICES FOR SOCIODEMOGRAPHIC DATA REPORTING IN DIGITAL MENTAL HEALTH INTERVENTION RESEARCH A SCOPING REVIEW	14	ISI	WOEBOT HEALTH;WICKS DIGITAL HEALTH;UNIVERSITY OF ARKANSAS FOR MEDICAL SCIENCES	NOTREPORTED;WOEBOT HEALTH;EMAIL: ATHENA@WOEBOTHEALTH.COM	KIRVIN-QUAMME A, 2024, BMJ OPEN	KIRVIN-QUAMME A, 2024, BMJ OPEN
TIMMONS A;DUONG J;SIMO F N;LEE T;VO H;AHLE M;COMER J;BREWER L;FRAZIER S;CHASPARI T	none	ADVANCES IN COMPUTER SCIENCE AND DATA-ANALYTIC METHODS ARE DRIVING A NEW ERA IN MENTAL HEALTH RESEARCH AND APPLICATION. ARTIFICIAL INTELLIGENCE (AI) TECHNOLOGIES HOLD THE POTENTIAL TO ENHANCE THE ASSESSMENT, DIAGNOSIS, AND TREATMENT OF PEOPLE EXPERIENCING MENTAL HEALTH PROBLEMS AND TO INCREASE THE REACH AND IMPACT OF MENTAL HEALTH CARE. HOWEVER, AI APPLICATIONS WILL NOT MITIGATE MENTAL HEALTH DIS…	DEPARTMENT OF PSYCHOLOGY, UNIVERSITY OF TEXAS AT AUSTIN INSTITUTE FOR MENTAL HEALTH RESEARCH, UNITED STATES; COLLIGA APPS CORPORATION, AUSTIN, TX, UNITED STATES; DEPARTMENT OF PSYCHOLOGY, FLORIDA INTERNATIONAL UNIVERSITY, UNITED STATES; DEPARTMENT OF COMPUTER SCIENCE & ENGINEERING, TEXAS A&M UNIVERSITY, UNITED STATES; DEPARTMENT OF CARDIOVASCULAR MEDICINE, MAYO CLINIC COLLEGE OF MEDICINE, UNITED …	ARTIFICIAL INTELLIGENCE; BIAS; FAIR AWARE; MENTAL HEALTH EQUITY	10.1177/17456916221134490	ARTICLE	ARTIFICIAL INTELLIGENCE; AWARENESS; BIAS; HUMANS; MENTAL HEALTH; TECHNOLOGY; ARTIFICIAL INTELLIGENCE; AWARENESS; HUMAN; MENTAL HEALTH; STATISTICAL BIAS; TECHNOLOGY	PERSPECT PSYCHOL SCI	PERSPECT. PSYCHOL. SCI.	ENGLISH	SAGE PUBLICATIONS INC.	2023	A.C. TIMMONS; DEPARTMENT OF PSYCHOLOGY, UNIVERSITY OF TEXAS AT AUSTIN INSTITUTE FOR MENTAL HEALTH RESEARCH, UNITED STATES; EMAIL: ADELA.TIMMONS@AUSTIN.UTEXAS.EDU	17456916	PERSPECTIVES ON PSYCHOLOGICAL SCIENCE	47	A CALL TO ACTION ON ASSESSING AND MITIGATING BIAS IN ARTIFICIAL INTELLIGENCE APPLICATIONS FOR MENTAL HEALTH	18	ISI	UNIVERSITY OF TEXAS AT AUSTIN INSTITUTE FOR MENTAL HEALTH RESEARCH;COLLIGA APPS CORPORATION;FLORIDA INTERNATIONAL UNIVERSITY;TEXAS AANDM UNIVERSITY;MAYO CLINIC COLLEGE OF MEDICINE;CENTER FOR HEALTH EQUITY AND COMMUNITY ENGAGEMENT RESEARCH	NOTREPORTED;UNIVERSITY OF TEXAS AT AUSTIN INSTITUTE FOR MENTAL HEALTH RESEARCH;NOTREPORTED	TIMMONS AC, 2023, PERSPECT PSYCHOL SCI	TIMMONS AC, 2023, PERSPECT PSYCHOL SCI
BHUGRA D;LIEBRENZ M;VENTRIGLIO A;NG R;JAVED A;KAR A;CHUMAKOV E;MOURA H;TOLENTINO E;GUPTA S;RUIZ R;OKASHA T;CHISOLM M;CASTALDELLI-MAIA J;TORALES J;SMITH A	none	ALTHOUGH THERE IS CONSIDERABLE EVIDENCE SHOWING THAT THE PREVENTION OF MENTAL ILLNESSES AND ADVERSE OUTCOMES AND MENTAL HEALTH PROMOTION CAN HELP PEOPLE LEAD BETTER AND MORE FUNCTIONAL LIVES, PUBLIC MENTAL HEALTH REMAINS OVERLOOKED IN THE BROADER CONTEXTS OF PSYCHIATRY AND PUBLIC HEALTH. LIKEWISE, IN UNDERGRADUATE AND POSTGRADUATE MEDICAL CURRICULA, PREVENTION AND MENTAL HEALTH PROMOTION HAVE OFT…	INSTITUTE OF PSYCHIATRY, PSYCHOLOGY AND NEUROSCIENCES, KINGS COLLEGE, LONDON, SE5 8AF, UNITED KINGDOM; DEPARTMENT OF FORENSIC PSYCHIATRY, UNIVERSITY OF BERN, BERN, SWITZERLAND; UNIVERSITY OF FOGGIA, FOGGIA, ITALY; WORLD PSYCHIATRIC ASSOCIATION, GENEVA, SWITZERLAND; FOUNTAIN HOUSE, LAHORE, PAKISTAN; ADVANCED NEUROPSYCHIATRY INSTITUTE, KOLKATA, INDIA; DEPARTMENT OF PSYCHIATRY & ADDICTION, ST PETERS…	MENTAL HEALTH PROMOTION; MENTAL ILLNESSES; PREVENTION; PUBLIC HEALTH; PUBLIC MENTAL HEALTH	10.1016/j.ajp.2024.104105	ARTICLE	HUMANS; MENTAL DISORDERS; MENTAL HEALTH; PSYCHIATRY; PUBLIC HEALTH; SOCIETIES; MEDICAL; ARTICLE; COGNITIVE BEHAVIORAL THERAPY; HEALTH DISPARITY; HEALTH EQUITY; HEALTH PROMOTION; HUMAN; MENTAL DISEASE; MENTAL HEALTH; PHILOSOPHY; PSYCHIATRY; PSYCHOLOGICAL WELL-BEING; PSYCHOTHERAPY; SOCIAL JUSTICE; MEDICAL SOCIETY; MENTAL DISEASE; MENTAL HEALTH; PREVENTION AND CONTROL; PUBLIC HEALTH	ASIAN J PSYCHIATRY	ASIAN J. PSYCHIATRY	ENGLISH	ELSEVIER B.V.	2024	D. BHUGRA; INSTITUTE OF PSYCHIATRY, PSYCHOLOGY AND NEUROSCIENCES, KINGS COLLEGE, LONDON, SE5 8AF, UNITED KINGDOM; EMAIL: DINESH.BHUGRA@KCL.AC.UK	18762018	ASIAN JOURNAL OF PSYCHIATRY	5	WORLD PSYCHIATRIC ASSOCIATIONASIAN JOURNAL OF PSYCHIATRY COMMISSION ON PUBLIC MENTAL HEALTH	98	ISI	KINGS COLLEGE;UNIVERSITY OF BERN;UNIVERSITY OF FOGGIA;WORLD PSYCHIATRIC ASSOCIATION;ADVANCED NEUROPSYCHIATRY INSTITUTE;ST PETERSBURG STATE UNIVERSITY;UNIVERSITY OF BRASILIA;ATENEO SCHOOL OF MEDICINE AND PUBLIC HEALTH;EAST LONDON NHS FOUNDATION TRUST;UNIVERSITY OF FRANCISCO MOAROQUIN;AIN SHAMS UNIVERSITY;JOHNS HOPKINS UNIVERSITY SCHOOL OF MEDICINE;UNIVERSITY OF SAO PAOLO;NATIONAL UNIVERSITY OF PAR…	NOTREPORTED;KINGS COLLEGE;NOTREPORTED	BHUGRA D, 2024, ASIAN J PSYCHIATRY	BHUGRA D, 2024, ASIAN J PSYCHIATRY
LARKIN J;PERICIN I;OSBORNE B;DODD P;COLLINS C	none	BACKGROUND: GENERAL PRACTITIONERS ARE THE GATEKEEPERS OF IRISH HEALTHCARE AND THEY OFFER CONTINUITY OF CARE TO PATIENTS. IRISH GENERAL PRACTICE IS THEREFORE CONSIDERED APPROPRIATE FOR PREVENTING, DIAGNOSING AND MANAGING MOST MENTAL HEALTH PROBLEMS. AIMS: THIS STUDY SOUGHT TO ESTABLISH THE CODING FREQUENCY, CONSULTATION FREQUENCY, PATIENT CHARACTERISTICS AND PHARMACOLOGICAL TREATMENT OF PATIENTS W…	IRISH COLLEGE OF GENERAL PRACTITIONERS, 4-5 LINCOLN PLACE, DUBLIN, IRELAND; MENTAL HEALTH SERVICES, HEALTH SERVICES EXECUTIVE, DUBLIN, IRELAND	BIPOLAR DISORDER; CLINICAL CODING; DEPRESSIVE DISORDER; PRESCRIPTIONS; SCHIZOPHRENIA; SEVERE MENTAL DISORDERS	10.1007/s11845-021-02747-4	ARTICLE	ADULT; CROSS-SECTIONAL STUDIES; FAMILY PRACTICE; FEMALE; GENERAL PRACTICE; GENERAL PRACTITIONERS; HUMANS; MALE; MENTAL DISORDERS; REFERRAL AND CONSULTATION; ANTIDEPRESSANT AGENT; NEUROLEPTIC AGENT; ANONYMISED DATA; ARTICLE; BIPOLAR DISORDER; CODING; CONSULTATION; CROSS-SECTIONAL STUDY; DEPRESSION; DISEASE SEVERITY; DRUG THERAPY; DUAL DIAGNOSIS; FEMALE; FREQUENCY; GENERAL PRACTICE; GENERAL PRACTIT…	IR J MED SCI	IR. J. MED. SCI.	ENGLISH	SPRINGER SCIENCE AND BUSINESS MEDIA DEUTSCHLAND GMBH	2022	C. COLLINS; IRISH COLLEGE OF GENERAL PRACTITIONERS, DUBLIN, 4-5 LINCOLN PLACE, IRELAND; EMAIL: CLAIRE.COLLINS@ICGP.IE	211265	IRISH JOURNAL OF MEDICAL SCIENCE	1	CROSSSECTIONAL ANALYSIS OF CODING PATIENT CHARACTERISTICS CONSULTATION FREQUENCY AND PHARMACOLOGICAL TREATMENT OF ADULTS WITH SEVERE MENTAL DISORDERS IN IRISH GENERAL PRACTICE	191	ISI	IRISH COLLEGE OF GENERAL PRACTITIONERS;MENTAL HEALTH SERVICES	C. COLLINS;IRISH COLLEGE OF GENERAL PRACTITIONERS;EMAIL: CLAIRE.COLLINS@ICGP.IE	LARKIN J, 2022, IR J MED SCI	LARKIN J, 2022, IR J MED SCI
MARI J;KIELING C;FERRI C;CASTALDELLI-MAIA J;RODRIGUES D S N;DE M M;FIDALGO T;SANCHEZ Z;SALUM G;ALMEIDA-FILHO N	none	THIS IS THE FIRST OF TWO DOCUMENTS PREPARED BY EXPERTS FOR THE BRAZILIAN S20 MENTAL HEALTH REPORT. THESE REPORTS OUTLINE STRATEGIES AIMED AT ADDRESSING THE EXACERBATED MENTAL HEALTH CHALLENGES ARISING FROM A POST-PANDEMIC WORLD. ONGOING PSYCHIATRIC EPIDEMIOLOGY RESEARCH HAS YIELDED EVIDENCE LINKING MENTAL HEALTH WITH INTRICATE SOCIAL DETERMINANTS, INCLUDING GENDER, RACE/ETHNICITY, RACISM, SOCIOEC…	DEPARTAMENTO DE PSIQUIATRIA, UNIVERSIDADE FEDERAL DE S?O PAULO (UNIFESP), SP, S?O PAULO, BRAZIL; URBAN MENTAL HEALTH SECTION, WORLD PSYCHIATRIC ASSOCIATION (WPA), GENEVA, SWITZERLAND; DIVIS?O DE PSIQUIATRIA DA INF?NCIA E ADOLESC?NCIA, DEPARTAMENTO DE PSIQUIATRIA, HOSPITAL DE CL?NICAS DE PORTO ALEGRE (HCPA), UNIVERSIDADE FEDERAL DO RIO GRANDE DO SUL (UFRGS), RS, PORTO ALEGRE, BRAZIL; UNIDADE DE PS…	CHILD HEALTH SERVICES; HUMAN RIGHTS; PSYCHIATRIC EPIDEMIOLOGY; SOCIAL DETERMINANTS OF HEALTH; VULNERABLE POPULATIONS	10.47626/1516-4446-2024-3706	ARTICLE	BRAZIL; HUMANS; MENTAL DISORDERS; MENTAL HEALTH; MENTAL HEALTH SERVICES; AGING; ARTICLE; BRAZILIAN S20 MENTAL HEALTH REPORT; COGNITIVE BEHAVIORAL THERAPY; DRUG DEPENDENCE; EDUCATION; ETHNICITY; HEALTH CARE POLICY; HEALTH CARE SYSTEM; HUMAN; HUMANITARIAN INTERVENTION; MENTAL DISEASE; MENTAL HEALTH; MENTAL HEALTH SERVICE; POSTTRAUMATIC STRESS DISORDER; PSYCHOTHERAPY; QUALITY OF LIFE; RACISM; REPROD…	BRAZILIAN JOURNAL OF PSYCHIATRY	BRAZILIAN JOURNAL OF PSYCHIATRY	ENGLISH	ASSOCIACAO BRASILEIRA DE PSIQUIATRIA	2024	J.J. MARI; DEPARTAMENTO DE PSIQUIATRIA, UNIVERSIDADE FEDERAL DE S?O PAULO, S?O PAULO, RUA MAJOR MARAGLIANO, 241, VILA MARIANA, SP, CEP 04017-030, BRAZIL; EMAIL: JAMARI17@GMAIL.COM	15164446	BRAZILIAN JOURNAL OF PSYCHIATRY	0	THE S20 BRAZILIAN MENTAL HEALTH REPORT FOR BUILDING A JUST WORLD AND A SUSTAINABLE PLANET PART I	46	ISI	UNIVERSIDADE FEDERAL DE S?O PAULO (UNIFESP);WORLD PSYCHIATRIC ASSOCIATION (WPA);UNIVERSIDADE FEDERAL DO RIO GRANDE DO SUL (UFRGS);CENTRO UNIVERSIT?RIO FACULDADE DE MEDICINA DO ABC;UNIVERSIDADE DE S?O PAULO (USP);GEOPSYCHIATRY SPECIAL INTEREST GROUP;INSTITUTO BRASILEIRO DE PSICOFARMACOLOGIA PR?TICA;FACULDADE ISRAELITA DE CI?NCIAS DA SA?DE ALBERT EINSTEIN;CHILD MIND INSTITUTE;INSTITUTO DE ESTUDOS A…	NOTREPORTED;UNIVERSIDADE FEDERAL DE S?O PAULO;NOTREPORTED	MARI JJ, 2024, BRAZILIAN JOURNAL OF PSYCHIATRY	MARI JJ, 2024, BRAZILIAN JOURNAL OF PSYCHIATRY
DAWSON-SQUIBB J;DAVIDS E;CHASE R;PUFFER E;RASMUSSEN J;FRANZ L;DE V P	none	THERE IS A LARGE ASSESSMENT AND TREATMENT GAP IN CHILD AND ADOLESCENT MENTAL HEALTH SERVICES, PROMINENTLY SO IN LOW-AND MIDDLE-INCOME COUNTRIES, WHERE 90% OF THE WORLD?S CHILDREN LIVE. THERE IS AN URGENT NEED TO FIND EVIDENCE-BASED INTERVENTIONS THAT CAN BE IMPLEMENTED SUCCESSFULLY IN THESE LOW-RESOURCE CONTEXTS. THIS PRE-PILOT STUDY AIMED TO EXPLORE THE BARRIERS AND FACILITATORS TO IMPLEMENTATIO…	DIVISION OF CHILD AND ADOLESCENT PSYCHIATRY, DEPARTMENT OF PSYCHIATRY & MENTAL HEALTH, FACULTY OF HEALTH SCIENCES, UNIVERSITY OF CAPE TOWN, CAPE TOWN, 7700, SOUTH AFRICA; JUDGE BAKER CHILDREN?S CENTER, HARVARD MEDICAL SCHOOL, BOSTON, 02115, MA, UNITED STATES; DEPARTMENT OF PSYCHOLOGY & NEUROSCIENCE, DUKE GLOBAL HEALTH INSTITUTE, DUKE UNIVERSITY, DURHAM, 27708, NC, UNITED STATES; DIVISION OF CHILD…	CHILD AND ADOLESCENT MENTAL HEALTH; IMPLEMENTATION; LOW-AND MIDDLE-INCOME COUNTRIES; PARENT?CHILD INTERACTION THERAPY	10.3390/ijerph19084450	ARTICLE	ADOLESCENT; FEASIBILITY STUDIES; HUMANS; MENTAL HEALTH SERVICES; PARENT-CHILD RELATIONS; PILOT PROJECTS; SOUTH AFRICA; SOUTH AFRICA; CHILD HEALTH; FEASIBILITY STUDY; IMPLEMENTATION PROCESS; MENTAL HEALTH; SUSTAINABILITY; YOUNG POPULATION; ADOLESCENT; ARTICLE; CAREGIVER; CHILD; CLINICAL ARTICLE; CONSENSUS; FEASIBILITY STUDY; FEMALE; HUMAN; HUMAN EXPERIMENT; MALE; MENTAL HEALTH; MIDDLE INCOME COUNT…	INT J ENVIRON RES PUBLIC HEALTH	INT. J. ENVIRON. RES. PUBLIC HEALTH	ENGLISH	MDPI	2022	J.-J. DAWSON-SQUIBB; DIVISION OF CHILD AND ADOLESCENT PSYCHIATRY, DEPARTMENT OF PSYCHIATRY & MENTAL HEALTH, FACULTY OF HEALTH SCIENCES, UNIVERSITY OF CAPE TOWN, CAPE TOWN, 7700, SOUTH AFRICA; EMAIL: JOHN-JOE.DAWSON-SQUIBB@UCT.AC.ZA	16617827	INTERNATIONAL JOURNAL OF ENVIRONMENTAL RESEARCH AND PUBLIC HEALTH	6	BRINGING PARENTCHILD INTERACTION THERAPY TO SOUTH AFRICA BARRIERS AND FACILITATORS AND OVERALL FEASIBILITYFIRST STEPS TO IMPLEMENTATION	19	ISI	UNIVERSITY OF CAPE TOWN;HARVARD MEDICAL SCHOOL;DUKE UNIVERSITY;DUKE UNIVERSITY	NOTREPORTED;UNIVERSITY OF CAPE TOWN;NOTREPORTED	DAWSON-SQUIBB JJ, 2022, INT J ENVIRON RES PUBLIC HEALTH	DAWSON-SQUIBB JJ, 2022, INT J ENVIRON RES PUBLIC HEALTH
CAMPION J;JAVED A;LUND C;SARTORIUS N;SAXENA S;MARMOT M;ALLAN J;UDOMRATN P	none	MENTAL DISORDERS ACCOUNT FOR AT LEAST 18% OF GLOBAL DISEASE BURDEN, AND THE ASSOCIATED ANNUAL GLOBAL COSTS ARE PROJECTED TO BE US$6 TRILLION BY 2030. EVIDENCE-BASED, COST-EFFECTIVE PUBLIC MENTAL HEALTH (PMH) INTERVENTIONS EXIST TO PREVENT MENTAL DISORDERS FROM ARISING, PREVENT ASSOCIATED IMPACTS OF MENTAL DISORDERS (INCLUDING THROUGH TREATMENT), AND PROMOTE MENTAL WELLBEING AND RESILIENCE. HOWEVE…	SOUTH LONDON AND MAUDSLEY NHS FOUNDATION TRUST, LONDON, UK, UNITED KINGDOM; PUBLIC MENTAL HEALTH IMPLEMENTATION CENTRE, ROYAL COLLEGE OF PSYCHIATRISTS, LONDON, UK, UNITED KINGDOM; DEPARTMENT OF MENTAL HEALTH AND WELLBEING, WARWICK MEDICAL SCHOOL, UNIVERSITY OF WARWICK, COVENTRY, UK, UNITED KINGDOM; KING'S GLOBAL HEALTH INSTITUTE, CENTRE FOR GLOBAL MENTAL HEALTH, HEALTH SERVICE AND POPULATION RESE…		10.1016/S2215-0366(21)00199-1	REVIEW	COVID-19; HEALTH POLICY; HUMANS; MENTAL DISORDERS; MENTAL HEALTH; MENTAL HEALTH SERVICES; PUBLIC HEALTH; CORONAVIRUS DISEASE 2019; DIGITAL TECHNOLOGY; ECONOMIC ASPECT; ECONOMICS; GOVERNMENT; HEALTH CARE POLICY; HEALTH LITERACY; HUMAN; HUMAN RIGHTS; LAW; LEADERSHIP; MENTAL DISEASE; MENTAL HEALTH; NEEDS ASSESSMENT; PANDEMIC; PROTECTION; PSYCHOLOGICAL RESILIENCE; PSYCHOLOGICAL WELL-BEING; PUBLIC HEA…	LANCET PSYCHIATRY	LANCET PSYCHIATRY	ENGLISH	ELSEVIER LTD	2022	J. CAMPION; SOUTH LONDON AND MAUDSLEY NHS FOUNDATION TRUST, LONDON, SE5 8AZ, UNITED KINGDOM; EMAIL: JONATHAN.CAMPION@SLAM.NHS.UK	22150366	THE LANCET PSYCHIATRY	71	PUBLIC MENTAL HEALTH REQUIRED ACTIONS TO ADDRESS IMPLEMENTATION FAILURE IN THE CONTEXT OF COVID19	9	ISI	SOUTH LONDON AND MAUDSLEY NHS FOUNDATION TRUST;ROYAL COLLEGE OF PSYCHIATRISTS;UNIVERSITY OF WARWICK;KING'S COLLEGE;UNIVERSITY OF CAPE TOWN;ASSOCIATION FOR THE IMPROVEMENT OF MENTAL HEALTH PROGRAMMES;HARVARD UNIVERSITY;INSTITUTE OF HEALTH EQUITY;ROYAL AUSTRALIAN AND NEW ZEALAND COLLEGE OF PSYCHIATRISTS;MENTAL HEALTH;UNIVERSITY OF QUEENSLAND MEDICAL SCHOOL;PRINCE OF SONGKLA UNIVERSITY	NOTREPORTED;SOUTH LONDON AND MAUDSLEY NHS FOUNDATION TRUST;NOTREPORTED	CAMPION J, 2022, LANCET PSYCHIATRY	CAMPION J, 2022, LANCET PSYCHIATRY
GOMEZ K;MCBRIDE O;ROBERTS E;ANGUS C;KEYES K;DRUMMOND C;BUCHAN I;FLEMING K;GILMORE I;DONOGHUE K;BONNET L;GOODWIN L	none	BACKGROUND: THERE IS STRONG EVIDENCE FOR THE CO-OCCURRENCE OF MENTAL HEALTH CONDITIONS AND ALCOHOL PROBLEMS, YET PHYSICAL HEALTH OUTCOMES AMONG THIS GROUP ARE NOT WELL CHARACTERISED. THIS STUDY AIMED TO IDENTIFY CLUSTERS OF PHYSICAL HEALTH CONDITIONS AND THEIR ASSOCIATIONS WITH MENTAL HEALTH AND PROBLEMATIC ALCOHOL USE IN ENGLAND?S GENERAL POPULATION. METHODS: CROSS-SECTIONAL ANALYSIS OF THE 2014…	DEPARTMENT OF PRIMARY CARE AND MENTAL HEALTH, UNIVERSITY OF LIVERPOOL, WATERHOUSE BLOCK B 1ST FLOOR, 1-5 BROWNLOW ST, LIVERPOOL, L69 3G, UNITED KINGDOM; SCHOOL OF PSYCHOLOGY, ULSTER UNIVERSITY, BELFAST, UNITED KINGDOM; NATIONAL ADDICTION CENTRE, INSTITUTE OF PSYCHIATRY, PSYCHOLOGY AND NEUROSCIENCE, KING?S COLLEGE LONDON AND SOUTH LONDON AND THE MAUDSLEY NHS FOUNDATION TRUST, LONDON, UNITED KINGDO…	ALCOHOL; LATENT CLASS ANALYSIS; MENTAL HEALTH; MULTIMORBIDITY; PHYSICAL HEALTH	10.1186/s12888-023-04577-3	ARTICLE	ADULT; ALCOHOLISM; CLUSTER ANALYSIS; CROSS-SECTIONAL STUDIES; HEALTH STATUS; HUMANS; MENTAL HEALTH; ALCOHOL; ADOLESCENT; ADULT; AGE; AGED; ALCOHOL CONSUMPTION; ALCOHOL USE DISORDERS IDENTIFICATION TEST; ALCOHOLISM; ARTHRITIS; ARTICLE; CLINICAL INTERVIEW SCHEDULE REVISED; CONTROLLED STUDY; CROSS-SECTIONAL STUDY; DIGESTIVE SYSTEM DISEASE; DISEASE ASSOCIATION; DISEASE BURDEN; EDUCATIONAL STATUS; ENG…	BMC PSYCHIATRY	BMC PSYCHIATRY	ENGLISH	BIOMED CENTRAL LTD	2023	K.U. GOMEZ; DEPARTMENT OF PRIMARY CARE AND MENTAL HEALTH, UNIVERSITY OF LIVERPOOL, LIVERPOOL, WATERHOUSE BLOCK B 1ST FLOOR, 1-5 BROWNLOW ST, L69 3G, UNITED KINGDOM; EMAIL: K.UJHELYI-GOMEZ@LIVERPOOL.AC.UK	1471244X	BMC PSYCHIATRY	5	THE CLUSTERING OF PHYSICAL HEALTH CONDITIONS AND ASSOCIATIONS WITH COOCCURRING MENTAL HEALTH PROBLEMS AND PROBLEMATIC ALCOHOL USE A CROSSSECTIONAL STUDY	23	ISI	UNIVERSITY OF LIVERPOOL;ULSTER UNIVERSITY;KING?S COLLEGE LONDON AND SOUTH LONDON AND THE MAUDSLEY NHS FOUNDATION TRUST;UNIVERSITY OF SHEFFIELD;COLUMBIA UNIVERSITY;UNIVERSITY OF LIVERPOOL;UNIVERSITY OF LIVERPOOL;UNIVERSITY COLLEGE LONDON;UNIVERSITY OF LIVERPOOL;LANCASTER UNIVERSITY	NOTREPORTED;UNIVERSITY OF LIVERPOOL;NOTREPORTED	GOMEZ KU, 2023, BMC PSYCHIATRY	GOMEZ KU, 2023, BMC PSYCHIATRY
TRANG D;HA B;VUI L;CHI N;THI L;DUONG D;HUNG D;DE C A;MANZANO A;LAKIN K;KANE S;MIRZOEV T	none	THE PREVALENCE OF COMMON PERINATAL MENTAL DISORDERS IN VIETNAM RANGES FROM 16.9% TO 39.9%, AND SUBSTANTIAL TREATMENT GAPS HAVE BEEN IDENTIFIED AT ALL LEVELS. THIS PAPER EXPLORES CONSTRAINTS TO THE INTEGRATION OF MATERNAL AND MENTAL HEALTH SERVICES AT THE PRIMARY HEALTHCARE LEVEL AND THE IMPLICATIONS FOR THE HEALTH SYSTEM'S RESPONSIVENESS TO THE NEEDS AND EXPECTATIONS OF PREGNANT WOMEN WITH MENTAL…	HANOI UNIVERSITY OF PUBLIC HEALTH, 1A DUC THANG, BAC TU LIEM, HA NOI, 10000, VIET NAM; GLOBAL HEALTH AND DEVELOPMENT, LONDON SCHOOL OF HYGIENE AND TROPICAL MEDICINE, KEPPEL ST, LONDON, WC1E 7HT, UNITED KINGDOM; SCHOOL OF SOCIOLOGY AND SOCIAL POLICY, UNIVERSITY OF LEEDS, LEEDS, LS2 9JT, UNITED KINGDOM; NOSSAL INSTITUTE FOR GLOBAL HEALTH, MELBOURNE SCHOOL OF POPULATION AND GLOBAL HEALTH, THE UNIVER…	COMMON PERINATAL MENTAL DISORDERS; HEALTH SYSTEM RESPONSIVENESS; INTEGRATION; MATERNAL MENTAL HEALTH	10.1093/heapol/czae027	ARTICLE	DELIVERY OF HEALTH CARE; INTEGRATED; FEMALE; FOCUS GROUPS; HEALTH SERVICES ACCESSIBILITY; HUMANS; MATERNAL HEALTH SERVICES; MENTAL DISORDERS; MENTAL HEALTH SERVICES; PREGNANCY; PRIMARY HEALTH CARE; QUALITATIVE RESEARCH; SOCIAL STIGMA; VIETNAM; FEMALE; HEALTH CARE ACCESS; HUMAN; INFORMATION PROCESSING; INTEGRATED HEALTH CARE SYSTEM; MATERNAL HEALTH SERVICE; MENTAL DISEASE; MENTAL HEALTH SERVICE; O…	HEALTH POLICY PLANN	HEALTH POLICY PLANN.	ENGLISH	OXFORD UNIVERSITY PRESS	2024	K. LAKIN; NOSSAL INSTITUTE FOR GLOBAL HEALTH, THE UNIVERSITY OF MELBOURNE, MELBOURNE, 3010, AUSTRALIA; EMAIL: KIMBERLYJLAKIN@GMAIL.COM	2681080	HEALTH POLICY AND PLANNING	2	UNDERSTANDING THE BARRIERS TO INTEGRATING MATERNAL AND MENTAL HEALTH AT PRIMARY HEALTH CARE IN VIETNAM	39	ISI	HANOI UNIVERSITY OF PUBLIC HEALTH;LONDON SCHOOL OF HYGIENE AND TROPICAL MEDICINE;UNIVERSITY OF LEEDS;THE UNIVERSITY OF MELBOURNE	NOTREPORTED;THE UNIVERSITY OF MELBOURNE;NOTREPORTED	TRANG DTH, 2024, HEALTH POLICY PLANN	TRANG DTH, 2024, HEALTH POLICY PLANN
HIEPKO A;SHOHAM N;MCMANUS S;COOPER C	none	OBJECTIVES PEOPLE LIVING IN LESS URBAN AREAS IN THE UK MAY HAVE REDUCED ACCESS TO MENTAL HEALTHCARE COMPARED WITH PEOPLE IN URBAN AREAS. ALTHOUGH THIS WAS NOT REPORTED IN THE 2000 ADULT PSYCHIATRIC MORBIDITY SURVEY (APMS) DATA, SUBSEQUENT CHANGES TO MENTAL HEALTH PROVISION AND ECONOMIC RECESSION MAY HAVE IMPACTED CARE INEQUALITIES. WE RE-EXAMINED THIS, HYPOTHESISING THAT THOSE LIVING IN LESS URBA…	DIVISION OF PSYCHIATRY, UNIVERSITY COLLEGE LONDON, LONDON, UNITED KINGDOM; WOLFSON INSTITUTE OF POPULATION HEALTH, QUEEN MARY UNIVERSITY, LONDON, UNITED KINGDOM; EAST LONDON NHS FOUNDATION TRUST, LONDON, UNITED KINGDOM; SRU, NATIONAL CENTRE FOR SOCIAL RESEARCH, LONDON, UNITED KINGDOM; VIOLENCE AND SOCIETY CENTRE, CITY UNIVERSITY, LONDON, UNITED KINGDOM; UNIVERSITY COLLEGE LONDON, LONDON, UNITED K…	DEPRESSION & MOOD DISORDERS; EPIDEMIOLOGIC STUDIES; MENTAL HEALTH	10.1136/bmjopen-2023-078635	ARTICLE	ADOLESCENT; ADULT; AGED; ANTIDEPRESSIVE AGENTS; CROSS-SECTIONAL STUDIES; ENGLAND; FEMALE; HEALTH SERVICES ACCESSIBILITY; HEALTHCARE DISPARITIES; HUMANS; MALE; MENTAL DISORDERS; MENTAL HEALTH SERVICES; MIDDLE AGED; RURAL POPULATION; SOCIOECONOMIC FACTORS; URBAN POPULATION; YOUNG ADULT; ANTIDEPRESSANT AGENT; ADOLESCENT; ADULT; ARTICLE; CONTROLLED STUDY; CROSS-SECTIONAL STUDY; ENGLAND; FEMALE; HUMAN…	BMJ OPEN	BMJ OPEN	ENGLISH	BMJ PUBLISHING GROUP	2024	C. COOPER; WOLFSON INSTITUTE OF POPULATION HEALTH, QUEEN MARY UNIVERSITY, LONDON, UNITED KINGDOM; EMAIL: CLAUDIA.COOPER@QMUL.AC.UK	20446055	BMJ OPEN	0	POPULATION DENSITY AND RECEIPT OF CARE FOR COMMON MENTAL DISORDERS A CROSSSECTIONAL ANALYSIS OF ENGLISH HOUSEHOLD DATA FROM THE 2014 ADULT PSYCHIATRIC MORBIDITY SURVEY	14	ISI	UNIVERSITY COLLEGE LONDON;QUEEN MARY UNIVERSITY;EAST LONDON NHS FOUNDATION TRUST;NATIONAL CENTRE FOR SOCIAL RESEARCH;CITY UNIVERSITY;UNIVERSITY COLLEGE LONDON;EAST LONDON NHS FOUNDATION TRSUT	NOTREPORTED;QUEEN MARY UNIVERSITY;NOTREPORTED	HIEPKO AT, 2024, BMJ OPEN	HIEPKO AT, 2024, BMJ OPEN
YANG Y;LAW M;VAGHRI Z	none	IN 2011, THE NEW BRUNSWICK GOVERNMENT RELEASED THE NEW BRUNSWICK MENTAL HEALTH ACTION PLAN 2011?2018 (ACTION PLAN). FOLLOWING THE RELEASE OF THE ACTION PLAN IN 2011, TWO PROGRESS REPORTS WERE RELEASED IN 2013 AND 2015, HIGHLIGHTING THE IMPLEMENTATION STATUS OF THE ACTION PLAN. WHILE VAGUE IN THEIR LANGUAGE, THESE REPORTS INDICATED CONSIDERABLE PROGRESS IN IMPLEMENTING THE ACTION PLAN, AS VARIOUS …	DEPARTMENT OF PSYCHOLOGY, FACULTY OF SCIENCE, APPLIED SCIENCE, AND ENGINEERING, UNIVERSITY OF NEW BRUNSWICK, NEW BRUNSWICK, SAINT JOHN, CANADA; DEPARTMENT OF PSYCHOLOGY, FACULTY OF SCIENCE, ST. MARY?S UNIVERSITY, NOVA SCOTIA, HALIFAX, CANADA; GLOBAL CHILD PROGRAM, INTEGRATED HEALTH INITIATIVE, FACULTY OF BUSINESS, UNIVERSITY OF NEW BRUNSWICK, NOVA SCOTIA, SAINT JOHN, CANADA		10.1371/journal.pone.0301008	ARTICLE	ADOLESCENT; CANADA; CHILD; CHILD; PRESCHOOL; FEMALE; HEALTH SURVEYS; HUMANS; MALE; MENTAL HEALTH; MENTAL HEALTH SERVICES; NEW BRUNSWICK; PROGRAM EVALUATION; ADOLESCENT; ADOLESCENT WELL BEING FRAMEWORK; ANXIETY; ARTICLE; AWARENESS; BEHAVIOR; CANADIAN; CHILD; CLINICAL OUTCOME; DECISION MAKING; DEPRESSION; DYSTHYMIA; EDUCATION; EMOTION; EMPLOYABILITY; EXERCISE; EXPLORATORY BEHAVIOR; HEALTH; HEALTH C…	PLOS ONE	PLOS ONE	ENGLISH	PUBLIC LIBRARY OF SCIENCE	2024	Y. YANG; DEPARTMENT OF PSYCHOLOGY, FACULTY OF SCIENCE, APPLIED SCIENCE, AND ENGINEERING, UNIVERSITY OF NEW BRUNSWICK, SAINT JOHN, NOVA SCOTIA, CANADA; EMAIL: YYANG26@UNB.CA	19326203	PLOS ONE	0	NEW BRUNSWICKS MENTAL HEALTH ACTION PLAN A QUANTITATIVE EXPLORATION OF PROGRAM EFFICACY IN CHILDREN AND YOUTH USING THE CANADIAN COMMUNITY HEALTH SURVEY	19	ISI	UNIVERSITY OF NEW BRUNSWICK;ST. MARY?S UNIVERSITY;UNIVERSITY OF NEW BRUNSWICK	NOTREPORTED;UNIVERSITY OF NEW BRUNSWICK;NOTREPORTED	YANG Y, 2024, PLOS ONE	YANG Y, 2024, PLOS ONE
JIANG A;ULRICH R;VAN D G K;TINTLE N;MCCARTHY M;BECKELHYMER D	none	AS THE UKRAINIAN HEALTH CARE SYSTEM UNDERGOES REFORM, SEVERE TREATMENT GAPS PERSIST FOR THOSE IN NEED OF MENTAL HEALTH TREATMENT. THIS STUDY EXPANDS THE LIMITED KNOWLEDGE OF FACTORS UNDERLYING TREATMENT-SEEKING BEHAVIOR. WE SOUGHT TO UNDERSTAND: WHAT ENCOURAGES OR DETERS UKRAINIANS FROM SEEKING MENTAL HEALTH TREATMENT? IN ADDITION, AMONG THOSE WHO CHOSE TO SEEK TREATMENT, WHAT INFLUENCES THE TYPE…	DEPARTMENT OF PSYCHOLOGY, SMITH COLLEGE, NORTHAMPTON, MA, UNITED STATES; DEPARTMENT OF MATHEMATICAL SCIENCES, MONTANA STATE UNIVERSITY, BOZEMAN, MT, UNITED STATES; DEPARTMENT OF SOCIAL WORK, DORDT UNIVERSITY, SIOUX CENTER, IA, UNITED STATES; DEPARTMENT OF COMMUNITY AND PUBLIC HEALTH, IDAHO STATE UNIVERSITY, POCATELLO, UNITED STATES; DEPARTMENT OF POPULATION HEALTH NURSING SCIENCE, COLLEGE OF NURS…	ALTERNATIVE TREATMENT; CONVENTIONAL TREATMENT; HEALTH DISPARITY; MENTAL HEALTH; UKRAINE	10.1080/00207411.2023.2177464	ARTICLE		INT J MENT HEALTH	INT. J. MENT. HEALTH	ENGLISH	ROUTLEDGE	2023	K. VAN DE GRIEND; DEPARTMENT OF COMMUNITY AND PUBLIC HEALTH, IDAHO STATE UNIVERSITY, POCATELLO, 83209, UNITED STATES; EMAIL: KRISTINVANDEGRIEN@ISU.EDU	207411	INTERNATIONAL JOURNAL OF MENTAL HEALTH	1	MENTAL HEALTH SERVICESEEKING BEHAVIOR IN POSTSOVIET UKRAINE	52	ISI	SMITH COLLEGE;MONTANA STATE UNIVERSITY;DORDT UNIVERSITY;IDAHO STATE UNIVERSITY;UNIVERSITY OF ILLINOIS-CHICAGO;DORDT UNIVERSITY;UNIVERSITY OF MINNESOTA	NOTREPORTED;IDAHO STATE UNIVERSITY;NOTREPORTED	JIANG A, 2023, INT J MENT HEALTH	JIANG A, 2023, INT J MENT HEALTH
ANDREOPOULOU A;VASIOU A;MASTROTHANASIS K	none	MENTAL ILLNESS STIGMA IS STILL A WIDESPREAD PHENOMENON WITH DAMAGING PSYCHOLOGICAL AND SOCIAL CONSEQUENCES. THIS STUDY IS OF RELEVANCE TO THE DESIGN OF APPROPRIATE PSYCHIATRIC SERVICES WHICH REINFORCE THE SOCIAL INTEGRATION OF INDIVIDUALS LIVING WITH MENTAL ILLNESS. IT INVESTIGATES THE RELATIONSHIP BETWEEN CONTACT, EMOTIONAL INTELLIGENCE (EI) AND ATTITUDES OF THE GENERAL POPULATION TOWARDS PEOPLE…	PSYCHIATRIC DEPARTMENT, GENERAL HOSPITAL OF KOZANI, KOZANI, GREECE; DEPARTMENT OF PRIMARY EDUCATION, UNIVERSITY OF CRETE, RETHYMNO, GREECE; SCHOOL OF MEDICINE, NATIONAL AND KAPODISTRIAN UNIVERSITY OF ATHENS, ATHENS, GREECE	ATTITUDES; CONTACT THEORY; EMOTIONAL INTELLIGENCE; MENTAL HEALTH; MENTAL ILLNESS; PREJUDICE REDUCTION; PUBLIC PERCEPTIONS; STIGMA REDUCTION	10.1002/jcop.23162	ARTICLE		J COMMUNITY PSYCHOL	J. COMMUNITY PSYCHOL.	ENGLISH	JOHN WILEY AND SONS INC	2024	A. VASIOU; DEPARTMENT OF PRIMARY EDUCATION, UNIVERSITY OF CRETE, RETHYMNO, GREECE; EMAIL: AVASIOU@UOC.GR	904392	JOURNAL OF COMMUNITY PSYCHOLOGY	0	THE ROLE OF CONTACT AND EMOTIONAL INTELLIGENCE IN THE ATTITUDES OF GENERAL POPULATION TOWARDS INDIVIDUALS LIVING WITH MENTAL ILLNESS		ISI	GENERAL HOSPITAL OF KOZANI;UNIVERSITY OF CRETE;NATIONAL AND KAPODISTRIAN UNIVERSITY OF ATHENS	NOTREPORTED;UNIVERSITY OF CRETE;NOTREPORTED	ANDREOPOULOU A, 2024, J COMMUNITY PSYCHOL	ANDREOPOULOU A, 2024, J COMMUNITY PSYCHOL
MACDONALD K;DESROSIERS L;LAPORTE L;IYER S	none	BACKGROUND: YOUTH INVOLVED IN CHILD WELFARE HAVE HIGH RATES OF MENTAL HEALTH PROBLEMS AND ARE KNOWN TO RECEIVE MENTAL HEALTH SERVICES FROM MULTIPLE SETTINGS. STILL, GAPS REMAIN IN OUR UNDERSTANDING OF SERVICE USE PATTERNS ACROSS SETTINGS OVER THE COURSE OF YOUTH?S INVOLVEMENT WITH CHILD WELFARE. OBJECTIVE: TO EXAMINE THE SETTINGS, REASONS FOR CONTACT, PERSONS INVOLVED IN INITIATING CARE, AND TIMI…	DEPARTMENT OF PSYCHIATRY, MCGILL UNIVERSITY, MONTREAL, QC, CANADA; CENTRE INTÂGRÂ UNIVERSITAIRE DE SANTE ET DE SERVICES SOCIAUX DU CENTRE-SUD DE-L?ILE-DE-MONTREAL, INSTITUT UNIVERSITAIRE JEUNES EN DIFFICULTÂ, MONTRÂAL, QC, CANADA; DEPARTMENT OF OCCUPATIONAL THERAPY, UNIVERSITÂ DU QUÂBEC ?, TROIS-RIVI?RES, QC, CANADA; ACCESS OPEN MINDS (PAN-CANADIAN YOUTH MENTAL HEALTH SERVICES RESEARCH NETW…	CHILD WELFARE; MENTAL HEALTH SERVICES; SERVICE USE; YOUTH		ARTICLE	ADOLESCENT; ADOPTION; ADULT; ARTICLE; CANADA; CHILD; CHILD WELFARE; EATING DISORDER; EMERGENCY WARD; EMOTIONAL ABUSE; FEMALE; FOLLOW UP; HALLUCINATION; HEALTH CARE; HEALTH CARE ORGANIZATION; HEALTH CARE POLICY; HEALTH SERVICE; HUMAN; IMMIGRATION; LOGISTIC REGRESSION ANALYSIS; MAJOR CLINICAL STUDY; MALE; MENTAL DISEASE; MENTAL HEALTH CARE; MENTAL HEALTH SERVICE; NEIGHBORHOOD; PHYSICAL ABUSE; POSTT…	J CAN ACAD CHILD ADOLESC PSYCHIATRY	J. CAN. ACAD. CHILD ADOLESC. PSYCHIATRY	ENGLISH	CANADIAN ACADEMY OF CHILD AND ADOLESCENT PSYCHIATRY	2024	S.N. IYER; DEPARTMENT OF PSYCHIATRY, MCGILL UNIVERSITY, MONTREAL, CANADA; EMAIL: SRIVIDYA.IYER@MCGILL.CA	17198429	JOURNAL OF THE CANADIAN ACADEMY OF CHILD AND ADOLESCENT PSYCHIATRY	1	MENTAL HEALTH SERVICE USE OF YOUNG PEOPLE IN CHILD WELFARE SERVICES IN QUEBEC CANADA	33	ISI	MCGILL UNIVERSITY;CENTRE INTÂGRÂ UNIVERSITAIRE DE SANTE ET DE SERVICES SOCIAUX DU CENTRE-SUD DE-L?ILE-DE-MONTREAL;UNIVERSITÂ DU QUÂBEC ?;DOUGLAS MENTAL HEALTH UNIVERSITY INSTITUTE	NOTREPORTED;MCGILL UNIVERSITY;NOTREPORTED	MACDONALD K, 2024, J CAN ACAD CHILD ADOLESC PSYCHIATRY	MACDONALD K, 2024, J CAN ACAD CHILD ADOLESC PSYCHIATRY
GORDON-ACHEBE K;LEGHA R;DURHAM M;HAMILTON A;PRAYLOW T;FORTUNA L	none		BHETC, LLC (BRINGING HEALTH EQUITY TRAINING AND CONSULTING TO COMMUNITIES OF COLOR), 8407 MAIN STREET, ELLICOTT CITY, 21043, MD, UNITED STATES; DEPARTMENT OF PSYCHIATRY & BEHAVIORAL SCIENCE, TULANE UNIVERSITY, SCHOOL OF MEDICINE, 1440 CANAL STREET, NEW ORLEANS, 70112, LA, UNITED STATES; DEPARTMENT OF PSYCHIATRY, DIVISION OF CHILD AND ADOLESCENT PSYCHIATRY, UNIVERSITY OF MARYLAND SCHOOL OF MEDICIN…	ANTIRACISM; DIVERSITY; EQUITY AND ACCESS TO CARE; HEALING-CENTERED ENGAGEMENT; SOCIAL JUSTICE; SYSTEMS OF CARE; WORKFORCE	10.1016/j.chc.2024.05.003	REVIEW	ADOLESCENT; CHILD; CHILD HEALTH SERVICES; HEALTH SERVICES ACCESSIBILITY; HUMANS; MENTAL DISORDERS; MENTAL HEALTH SERVICES; UNITED STATES; ANTIRACISM; ANXIETY DISORDER; BEHAVIOR DISORDER; CHILD PSYCHIATRY; CLINICAL PRACTICE; CORONAVIRUS DISEASE 2019; DEPRESSION; DEVELOPMENTAL DISORDER; DIVERSITY; EQUITY AND INCLUSION; EATING DISORDER; FINANCIAL MANAGEMENT; HEALTH CARE ACCESS; HEALTH CARE DELIVERY;…	CHILD ADOLESC PSYCHIATR CLIN NORTH AM	CHILD ADOLESC. PSYCHIATR. CLIN. NORTH AM.	ENGLISH	W.B. SAUNDERS	2024	K. GORDON-ACHEBE; BHETC, ELLICOTT CITY, LLC 8407 MAIN STREET, 21043, UNITED STATES; EMAIL: DRKIMGORDON@BHETCGROUP.COM	10564993	CHILD AND ADOLESCENT PSYCHIATRIC CLINICS OF NORTH AMERICA	0	REIMAGINING THE CARE IN SYSTEMS TO COMBAT THE PEDIATRIC MENTAL HEALTH CRISIS IN AMERICA A HEALINGCENTERED APPROACH	33	ISI	LLC (BRINGING HEALTH EQUITY TRAINING AND CONSULTING TO COMMUNITIES OF COLOR);TULANE UNIVERSITY;UNIVERSITY OF MARYLAND SCHOOL OF MEDICINE;UNIVERSITY OF HOUSTON TILMAN J. FERTITTA FAMILY COLLEGE OF MEDICINE;UMSOM OFFICE OF STUDENT AFFAIRS;RESILIENCY EMPOWERMENT STRATEGIES;DEPARTMENT OF PSYCHIATRY AND NEUROSCIENCE	NOTREPORTED;NOTREPORTED;NOTREPORTED	GORDON-ACHEBE K, 2024, CHILD ADOLESC PSYCHIATR CLIN NORTH AM	GORDON-ACHEBE K, 2024, CHILD ADOLESC PSYCHIATR CLIN NORTH AM
HARRIMAN N;WILLIAMS D;MORGAN J;SEWPAUL R;MANYAAPELO T;SIFUNDA S;MABASO M;MBEWU A;REDDY S	none	PURPOSE: SOUTH AFRICA HAS LONG ENDURED A HIGH PREVALENCE OF MENTAL DISORDERS AT THE NATIONAL LEVEL, AND ITS UNIQUE SOCIAL AND HISTORICAL CONTEXT COULD BE A CONTRIBUTOR TO AN INCREASED RISK OF MENTAL HEALTH PROBLEMS. OUR CURRENT UNDERSTANDING IS LIMITED REGARDING THE RELATIVE IMPORTANCE OF VARIOUS SOCIAL DETERMINANTS TO MENTAL HEALTH CHALLENGES IN SOUTH AFRICA, AND HOW EXISTING RACIAL INEQUITIES M…	DEPARTMENT OF SOCIAL AND BEHAVIORAL SCIENCES, HARVARD T.H. CHAN SCHOOL OF PUBLIC HEALTH, 677 HUNTINGTON AVENUE, KRESGE BUILDING, BOSTON, 02115, MA, UNITED STATES; DEPARTMENT OF AFRICAN AND AFRICAN AMERICAN STUDIES, HARVARD UNIVERSITY, 12 QUINCY ST, CAMBRIDGE, 02138, MA, UNITED STATES; HUMAN AND SOCIAL CAPABILITIES (HSC) DEPARTMENT, HUMAN SCIENCES RESEARCH COUNCIL (HSRC), PRIVATE BAG X9182, CAPE T…	PSYCHOLOGICAL DISTRESS; RACIAL DISPARITIES; SOUTH AFRICA; STRESSORS; TRAUMATIC EVENTS	10.1007/s00127-021-02175-w	ARTICLE	APARTHEID; CROSS-SECTIONAL STUDIES; HUMANS; NUTRITION SURVEYS; PSYCHOLOGICAL DISTRESS; SOUTH AFRICA; APARTHEID; CROSS-SECTIONAL STUDY; DISTRESS SYNDROME; EPIDEMIOLOGY; HUMAN; NUTRITION; SOUTH AFRICA	SOC PSYCHIATRY PSYCHIATR EPIDEMIOL	SOC. PSYCHIATRY PSYCHIATR. EPIDEMIOL.	ENGLISH	SPRINGER SCIENCE AND BUSINESS MEDIA DEUTSCHLAND GMBH	2022	N.W. HARRIMAN; DEPARTMENT OF SOCIAL AND BEHAVIORAL SCIENCES, HARVARD T.H. CHAN SCHOOL OF PUBLIC HEALTH, BOSTON, 677 HUNTINGTON AVENUE, KRESGE BUILDING, 02115, UNITED STATES; EMAIL: NHARRIMAN@HSPH.HARVARD.EDU	9337954	SOCIAL PSYCHIATRY AND PSYCHIATRIC EPIDEMIOLOGY	8	RACIAL DISPARITIES IN PSYCHOLOGICAL DISTRESS IN POSTAPARTHEID SOUTH AFRICA RESULTS FROM THE SANHANES1 SURVEY	57	ISI	HARVARD T.H. CHAN SCHOOL OF PUBLIC HEALTH;HARVARD UNIVERSITY;HUMAN SCIENCES RESEARCH COUNCIL (HSRC);SEFAKO MAKGATHO HEALTH SCIENCES UNIVERSITY;NELSON MANDELA UNIVERSITY	NOTREPORTED;HARVARD T.H. CHAN SCHOOL OF PUBLIC HEALTH;NOTREPORTED	HARRIMAN NW, 2022, SOC PSYCHIATRY PSYCHIATR EPIDEMIOL	HARRIMAN NW, 2022, SOC PSYCHIATRY PSYCHIATR EPIDEMIOL
FIRTH N;BARKHAM M;DELGADILLO J;ALLERY K;WOODWARD J;O'CATHAIN A	none	DROPOUT DURING PSYCHOLOGICAL INTERVENTION IS A SIGNIFICANT PROBLEM. PREVIOUS EVIDENCE FOR ASSOCIATIONS WITH SOCIOECONOMIC DEPRIVATION IS MIXED. THIS STUDY AIMED TO REVIEW THE EVIDENCE FOR ASSOCIATIONS BETWEEN DEPRIVATION AND DROPOUT FROM CONTEMPORARY ADULT PSYCHOLOGICAL INTERVENTIONS FOR COMMON MENTAL DISORDERS (CMDS). SYSTEMATIC REVIEW, NARRATIVE SYNTHESIS AND RANDOM EFFECTS META-ANALYSIS OF PEE…	SCHOOL OF HEALTH AND RELATED RESEARCH, UNIVERSITY OF SHEFFIELD, SHEFFIELD, S10 2TN, UNITED KINGDOM; CLINICAL AND APPLIED PSYCHOLOGY UNIT, UNIVERSITY OF SHEFFIELD, SHEFFIELD, S10 2TN, UNITED KINGDOM; MEDICAL SCHOOL, UNIVERSITY OF SHEFFIELD, SHEFFIELD, S10 2TN, UNITED KINGDOM	COMMON MENTAL DISORDERS; DEPRIVATION; DROPOUT; META-ANALYSIS; REVIEW; SOCIOECONOMIC	10.1007/s10488-021-01178-8	ARTICLE	ADULT; COGNITIVE BEHAVIORAL THERAPY; FEMALE; HUMANS; MALE; MENTAL DISORDERS; PSYCHOSOCIAL INTERVENTION; SOCIOECONOMIC FACTORS; ADULT; COGNITIVE BEHAVIORAL THERAPY; FEMALE; HUMAN; MALE; MENTAL DISEASE; META ANALYSIS; SOCIOECONOMICS	ADM POLICY MENT HEALTH MENT HEALTH SERV RES	ADM. POLICY MENT. HEALTH MENT. HEALTH SERV. RES.	ENGLISH	SPRINGER	2022	N. FIRTH; SCHOOL OF HEALTH AND RELATED RESEARCH, UNIVERSITY OF SHEFFIELD, SHEFFIELD, S10 2TN, UNITED KINGDOM; EMAIL: NICK.FIRTH@GMAIL.COM	0894587X	ADMINISTRATION AND POLICY IN MENTAL HEALTH AND MENTAL HEALTH SERVICES RESEARCH	3	SOCIOECONOMIC DEPRIVATION AND DROPOUT FROM CONTEMPORARY PSYCHOLOGICAL INTERVENTION FOR COMMON MENTAL DISORDERS A SYSTEMATIC REVIEW	49	ISI	UNIVERSITY OF SHEFFIELD;UNIVERSITY OF SHEFFIELD;UNIVERSITY OF SHEFFIELD	NOTREPORTED;UNIVERSITY OF SHEFFIELD;NOTREPORTED	FIRTH N, 2022, ADM POLICY MENT HEALTH MENT HEALTH SERV RES	FIRTH N, 2022, ADM POLICY MENT HEALTH MENT HEALTH SERV RES
WANG X;WALLACE D;INFANTE A	none	HEALTH RESEARCH HAS ESTABLISHED THAT THERE EXIST SIGNIFICANT AND CONSISTENT RACIAL DISPARITIES IN HEALTH OUTCOMES, ACCESS TO HEALTHCARE, AND SCOPE AND QUALITY OF HEALTHCARE. AN UNRESOLVED QUESTION IS WHETHER THERE ARE DIFFERENT PATHWAYS BETWEEN HEALTH AND RECIDIVISM FOR WHITE VERSUS BLACK INDIVIDUALS WHO WERE FORMERLY INCARCERATED (IFI). USING THE SERIOUS AND VIOLENT OFFENDER REENTRY INITIATIVE (…	ARIZONA STATE UNIVERSITY, PHOENIX, UNITED STATES; PORTLAND STATE UNIVERSITY, OR, UNITED STATES	HEALTH; HEALTHCARE; MENTAL HEALTH; RACE; REENTRY	10.1177/00111287241305341	ARTICLE		CRIME DELINQ	CRIME DELINQ.	ENGLISH	SAGE PUBLICATIONS INC.	2024	X. WANG; SCHOOL OF CRIMINOLOGYCRIMINAL JUSTICE, ARIZONA STATE UNIVERSITY, PHOENIX, 411 NORTH CENTRAL AVENUE, SUITE 600, 85004, UNITED STATES; EMAIL: XIAWANG@ASU.EDU	111287	CRIME AND DELINQUENCY	0	RACE HEALTH AND RECIDIVISM EXAMINING THE EFFECTS OF HEALTH STATUS AND HEALTHCARE NEEDS ON RECIDIVISM FOR BLACK AND WHITE FORMERLY INCARCERATED PEOPLE		ISI	ARIZONA STATE UNIVERSITY;PORTLAND STATE UNIVERSITY	NOTREPORTED;ARIZONA STATE UNIVERSITY;NOTREPORTED	WANG X, 2024, CRIME DELINQ	WANG X, 2024, CRIME DELINQ
YUDKIN J;BAKSHI P;CRAKER K;TAHA S	none	THIS PAPER EXPLORES HOW WESTERN MEDICINE MAY NOT FULLY UNDERSTAND AND ADDRESS POST-TRAUMATIC STRESS DISORDER (PTSD) AND OTHER TRAUMA-INDUCED ILLNESSES IN A CULTURALLY APPROPRIATE MANNER IN MARGINALIZED COMMUNITIES AND OFFERS A THEORETICAL FRAMEWORK TO DEVELOP COMPREHENSIVE, EFFECTIVE, AND SUSTAINABLE SOLUTIONS THAT COMPREHENSIVELY ADDRESS AND TREAT THE TRAUMA ON BOTH A COLLECTIVE AND INDIVIDUAL L…	DEPARTMENT OF EPIDEMIOLOGY, HUMAN GENETICS AND ENVIRONMENTAL SCIENCES, UNIVERSITY OF TEXAS HEALTH SCIENCES CENTER AT HOUSTON SCHOOL OF PUBLIC HEALTH, 6011 HARRY HINES BLVD, DALLAS, 75235, TX, UNITED STATES; GEORGE WARREN BROWN SCHOOL OF SOCIAL WORK, WASHINGTON UNIVERSITY IN ST. LOUIS, ST. LOUIS, 63130, UNITED STATES; MEDICINE, AN-NAJAH NATIONAL UNIVERSITIES, NABLUS, PALESTINE	COLLECTIVE TRAUMA; COLONIALISM; COLONIALITY; INTERNATIONAL CONTEXT; MENTAL HEALTH; PALESTINIANS; POSTMODERNITY; PTSD	10.1007/s10597-021-00822-9	ARTICLE	ARABS; HUMANS; MENTAL HEALTH; STRESS DISORDERS; POST-TRAUMATIC; ARAB; HUMAN; MENTAL HEALTH; POSTTRAUMATIC STRESS DISORDER	COMMUNITY MENT HEALTH J	COMMUNITY MENT. HEALTH J.	ENGLISH	SPRINGER	2022	J.S. YUDKIN; DEPARTMENT OF EPIDEMIOLOGY, HUMAN GENETICS AND ENVIRONMENTAL SCIENCES, UNIVERSITY OF TEXAS HEALTH SCIENCES CENTER AT HOUSTON SCHOOL OF PUBLIC HEALTH, DALLAS, 6011 HARRY HINES BLVD, 75235, UNITED STATES; EMAIL: JOSHUA.YUDKIN@UTH.TMC.EDU	103853	COMMUNITY MENTAL HEALTH JOURNAL	4	THE COMPREHENSIVE COMMUNAL TRAUMA INTERVENTION MODEL CCTIM AN INNOVATIVE TRANSDISCIPLINARY POPULATIONLEVEL MODEL FOR TREATING TRAUMAINDUCED ILLNESS AND MENTAL HEALTH IN GLOBAL VULNERABLE COMMUNITIES PALESTINE A CASE STUDY	58	ISI	UNIVERSITY OF TEXAS HEALTH SCIENCES CENTER AT HOUSTON SCHOOL OF PUBLIC HEALTH;WASHINGTON UNIVERSITY IN ST. LOUIS;AN-NAJAH NATIONAL UNIVERSITIES	NOTREPORTED;UNIVERSITY OF TEXAS HEALTH SCIENCES CENTER AT HOUSTON SCHOOL OF PUBLIC HEALTH;NOTREPORTED	YUDKIN JS, 2022, COMMUNITY MENT HEALTH J	YUDKIN JS, 2022, COMMUNITY MENT HEALTH J
NANJI N;OLIVIER J	none	BACKGROUND: PSYCHOLOGICAL DISTURBANCES AND MENTAL ILLNESSES ARE PREVALENT ON THE CONTINENT OF AFRICA. THERE ARE SHORTAGES OF MENTAL HEALTH SERVICES AND A LACK OF QUALITY PROVIDERS WITH LIMITED TRAINING AND SUPERVISION. IT IS PERCEIVED THAT FAITH-BASED ENTITIES FOR PSYCHO-EMOTIONAL HEALTH AND WELLBEING ARE FILLING THE GAP WITH POSITIVE IMPACT. HOWEVER, THE RISKS ASSOCIATED WITH UNCONVENTIONAL OR E…	HEALTH POLICY & SYSTEMS, SCHOOL OF PUBLIC HEALTH AND FAMILY MEDICINE, FACULTY OF HEALTH SCIENCES, UNIVERSITY OF CAPE TOWN, SOUTH AFRICA	AFRICA; CULTURE; EMOTIONAL STRUGGLES; FAITH-BASED; HARMFUL TREATMENTS; HEALTH PROVIDERS; MENTAL HEALTH; MENTAL HEALTHCARE; MENTAL-HEALTH SYSTEM; PSYCHOLOGICAL WELL-BEING; RELIGION	10.15566/cjgh.v11i1.795	ARTICLE		CHRIS J GLO HEALTH	CHRIS. J. GLO. HEALTH	ENGLISH	CENTER FOR HEALTH IN MISSION	2024	N. NANJI; SOUTH AFRICA; EMAIL: NANJINADINE@GMAIL.COM	21672415	CHRISTIAN JOURNAL FOR GLOBAL HEALTH	0	PROVIDING MENTAL HEALTHCARE THROUGH FAITHBASED ENTITIES IN AFRICA A SYSTEMATIC REVIEW	11	ISI	UNIVERSITY OF CAPE TOWN	NOTREPORTED;NOTREPORTED;NOTREPORTED	NANJI N, 2024, CHRIS J GLO HEALTH	NANJI N, 2024, CHRIS J GLO HEALTH
FENG A;O'NEILL S;ROSTAIN A	none	OBJECTIVE: RATES OF ADHD ARE LOWEST AMONG ASIAN AMERICAN CHILDREN (1?6.1%) COMPARED TO ALL OTHER MAJOR ETHNIC AND RACIAL GROUPS IN THE US, BUT THERE IS LIMITED LITERATURE ON REASONS FOR THE DISPARITY IN ESTIMATED PREVALENCE RATES. METHOD: WE CONDUCTED A NARRATIVE REVIEW TO INTEGRATE THE LITERATURE ON ADHD IN CHILDREN IN ASIAN COUNTRIES WITH THAT ON ADHD AMONG ASIAN AMERICAN YOUTH TO HIGHLIGHT POT…	PSYCHOLOGY DEPARTMENT, THE CITY COLLEGE OF NEW YORK, CITY UNIVERSITY OF NEW YORK, NEW YORK, NY, UNITED STATES; PSYCHOLOGY DEPARTMENT, THE GRADUATE CENTER, CITY UNIVERSITY OF NEW YORK, NEW YORK, NY, UNITED STATES; DEPARTMENT OF PSYCHIATRY, COOPER MEDICAL SCHOOL OF ROWAN UNIVERSITY, CAMDEN, NJ, UNITED STATES	ADHD; ASIAN AMERICAN CHILDREN; RACIAL BIAS; RACIAL/ETHNIC MINORITIES; STIGMA	10.1177/10870547241264113	ARTICLE	ASIAN; ATTENTION DEFICIT DISORDER WITH HYPERACTIVITY; CHILD; HUMANS; PREVALENCE; UNITED STATES; ASIAN; ATTENTION DEFICIT HYPERACTIVITY DISORDER; CHILD; DIAGNOSIS; EPIDEMIOLOGY; ETHNOLOGY; HUMAN; PREVALENCE; PSYCHOLOGY; UNITED STATES	J ATTEN DISORD	J. ATTEN. DISORD.	ENGLISH	SAGE PUBLICATIONS INC.	2024	S. O?NEILL; PSYCHOLOGY DEPARTMENT, THE CITY COLLEGE OF NEW YORK, CITY UNIVERSITY OF NEW YORK, NEW YORK, UNITED STATES; EMAIL: SONEILL2@CCNY.CUNY.EDU	10870547	JOURNAL OF ATTENTION DISORDERS	1	CONTRIBUTORS TO UNDERDIAGNOSIS OF ADHD AMONG ASIAN AMERICANS A NARRATIVE REVIEW	28	ISI	CITY UNIVERSITY OF NEW YORK;CITY UNIVERSITY OF NEW YORK;COOPER MEDICAL SCHOOL OF ROWAN UNIVERSITY	NOTREPORTED;CITY UNIVERSITY OF NEW YORK;NOTREPORTED	FENG A, 2024, J ATTEN DISORD	FENG A, 2024, J ATTEN DISORD
OCCHIPINTI J;BUCHANAN J;SKINNER A;SONG Y;TRAN K;ROSENBERG S;FELS A;DORAISWAMY P;MEIER P;PRODAN A;HICKIE I	none	THE COVID-19 PANDEMIC HAS EXPOSED THE DEEP LINKS AND FRAGILITY OF ECONOMIC, HEALTH AND SOCIAL SYSTEMS. DISCUSSIONS OF RECONSTRUCTION INCLUDE RENEWED INTEREST IN MOVING BEYOND GDP AND RECOGNIZING ?HUMAN CAPITAL?, ?BRAIN CAPITAL?, ?MENTAL CAPITAL?, AND ?WELLBEING? AS ASSETS FUNDAMENTAL TO ECONOMIC REIMAGINING, PRODUCTIVITY, AND PROSPERITY. THIS PAPER DESCRIBES HOW THE CONCEPTUALIZATION OF MENTAL WE…	FACULTY OF MEDICINE AND HEALTH, BRAIN AND MIND CENTRE, UNIVERSITY OF SYDNEY, SYDNEY, NSW, AUSTRALIA; COMPUTER SIMULATION AND ADVANCED RESEARCH TECHNOLOGIES, SYDNEY, NSW, AUSTRALIA; MENTAL WEALTH INITIATIVE, UNIVERSITY OF SYDNEY, SYDNEY, NSW, AUSTRALIA; MELBOURNE INSTITUTE OF APPLIED ECONOMIC AND SOCIAL RESEARCH, MELBOURNE LAW SCHOOL, UNIVERSITY OF MELBOURNE, MELBOURNE, VIC, AUSTRALIA; DEPARTMENTS…	GROSS DOMESTIC PRODUCT (GDP); MENTAL CAPITAL; MENTAL HEALTH; POLICY ANALYSIS; SIMULATION; SYSTEMS MODELING; WELLBEING	10.3389/fpubh.2022.879183	REVIEW	COVID-19; FORECASTING; HEALTH STATUS; HUMANS; MENTAL HEALTH; PANDEMICS; EPIDEMIOLOGY; FORECASTING; HEALTH STATUS; HUMAN; MENTAL HEALTH; PANDEMIC	FRONT PUBLIC HEALTH	FRONT. PUBLIC HEALTH	ENGLISH	FRONTIERS MEDIA S.A.	2022	J.-A. OCCHIPINTI; FACULTY OF MEDICINE AND HEALTH, BRAIN AND MIND CENTRE, UNIVERSITY OF SYDNEY, SYDNEY, AUSTRALIA; EMAIL: JO-AN.OCCHIPINTI@SYDNEY.EDU.AU	22962565	FRONTIERS IN PUBLIC HEALTH	9	MEASURING MODELING AND FORECASTING THE MENTAL WEALTH OF NATIONS	10	ISI	UNIVERSITY OF SYDNEY;COMPUTER SIMULATION AND ADVANCED RESEARCH TECHNOLOGIES;UNIVERSITY OF SYDNEY;UNIVERSITY OF MELBOURNE;DUKE UNIVERSITY SCHOOL OF MEDICINE;UNIVERSITY OF GLASGOW;WESTERN SYDNEY UNIVERSITY	NOTREPORTED;UNIVERSITY OF SYDNEY;NOTREPORTED	OCCHIPINTI JA, 2022, FRONT PUBLIC HEALTH	OCCHIPINTI JA, 2022, FRONT PUBLIC HEALTH
TINDI K;KALUNGI A;KINYANDA E;GELAYE B;MARTIN A;GALIWANGO R;SSEMBAJJWE W;KIRUMIRA F;PRETORIUS A;STEVENSON A;NEWTON C;STEIN D;ATKINSON E;MWESIGA E;KYEBUZIBWA J;CHIBNIK L;ATWOLI L;BAKER M;ALEMAYEHU M;MWENDE R;STROUD R;TEFERRA S;GICHURU S;KARIUKI S;ZINGELA Z;NYIRENDA M;FATUMO S;AKENA D	none	IMPORTANCE: PSYCHOLOGICAL DISTRESS IS CHARACTERIZED BY ANXIETY AND DEPRESSIVE SYMPTOMS. ALTHOUGH PRIOR RESEARCH HAS INVESTIGATED THE OCCURRENCE AND FACTORS ASSOCIATED WITH PSYCHOLOGICAL DISTRESS IN LOW-AND MIDDLE-INCOME COUNTRIES, INCLUDING THOSE IN AFRICA, THESE STUDIES' FINDINGS ARE NOT VERY GENERALIZABLE AND HAVE FOCUSED ON DIFFERENT KINDS OF POPULATION GROUPS. OBJECTIVE: TO INVESTIGATE THE PR…	DEPARTMENT OF IMMUNOLOGY AND MOLECULAR BIOLOGY, COLLEGE OF HEALTH SCIENCES, MAKERERE UNIVERSITY, KAMPALA, UGANDA; SCHOOL OF PSYCHOLOGY AND VISION SCIENCES, UNIVERSITY OF LEICESTER, LEICESTER, UNITED KINGDOM; THE AFRICAN COMPUTATIONAL GENOMICS GROUP, MEDICAL RESEARCH COUNCIL, UGANDA VIRUS RES. INSTITUTE AND LONDON SCHOOL OF HYGIENE AND TROPICAL MEDICINE UGANDA RESEARCH UNIT, ENTEBBE, UGANDA; THE A…		10.1001/jamanetworkopen.2024.38304	ARTICLE	ADULT; AFRICA; EASTERN; AFRICA; SOUTHERN; CASE-CONTROL STUDIES; ETHNICITY; FEMALE; HUMANS; MALE; MIDDLE AGED; PREVALENCE; PSYCHOLOGICAL DISTRESS; STRESS; PSYCHOLOGICAL; YOUNG ADULT; ALCOHOL; CANNABIS; ADULT; AFRICA; ALCOHOL CONSUMPTION; ARTHRITIS; ARTICLE; BACKACHE; CANNABIS USE; CASE CONTROL STUDY; CLINICAL FEATURE; COHABITING PERSON; COMORBIDITY; CONTROLLED STUDY; DISEASE SEVERITY; DISTRESS SYN…	JAMA NETW OPEN	JAMA NETW. OPEN	ENGLISH	AMERICAN MEDICAL ASSOCIATION	2024	A. KALUNGI; MAKERERE UNIVERSITY, KAMPALA, UPPER MULAGO HILL ROAD, 256, UGANDA; EMAIL: KALUNGI@MRCUGANDA.ORG	25743805	JAMA NETWORK OPEN	0	PSYCHOLOGICAL DISTRESS AMONG ETHNICALLY DIVERSE PARTICIPANTS FROM EASTERN AND SOUTHERN AFRICA	7	ISI	MAKERERE UNIVERSITY;UNIVERSITY OF LEICESTER;UGANDA VIRUS RES. INSTITUTE AND LONDON SCHOOL OF HYGIENE AND TROPICAL MEDICINE UGANDA RESEARCH UNIT;THE AFRICAN CENTER OF EXCELLENCE IN BIOINFORMATICS AND DATA INTENSIVE SCIENCES;MAKERERE UNIVERSITY;MAKERERE UNIVERSITY;LONDON SCHOOL OF HYGIENE AND TROPICAL MEDICINE UGANDA RESEARCH UNIT;LONDON SCHOOL OF HYGIENE AND TROPICAL MEDICINE UGANDA RESEARCH UNIT;…	NOTREPORTED;MAKERERE UNIVERSITY;NOTREPORTED	TINDI KBB, 2024, JAMA NETW OPEN	TINDI KBB, 2024, JAMA NETW OPEN
BAGHOORI D;RODUTA R M;CHEN S	none	OBJECTIVE. THIS STUDY AIMED TO EXPLORE THE MENTAL HEALTH STATUS, COPING STRATEGIES, AND SOCIAL SUPPORT OF INTERNATIONAL STUDENTS IN CANADA. PARTICIPANTS. UNDERGRADUATE AND GRADUATE INTERNATIONAL STUDENTS STUDYING AT ONE CANADIAN UNIVERSITY PARTICIPATED IN AN ONLINE SURVEY. METHODS. THE SURVEY CONSISTING OF FOUR ASSESSMENTS?THE MENTAL HEALTH CONTINUUM-SHORT FORM, KESSLER PSYCHOLOGICAL DISTRESS SCA…	DEPARTMENT OF OCCUPATIONAL THERAPY, FACULTY OF REHABILITATION MEDICINE, COLLEGE OF HEALTH SCIENCES, UNIVERSITY OF ALBERTA, EDMONTON, AB, CANADA	COPING STRATEGIES; POST-SECONDARY STUDENTS; PSYCHOLOGICAL DISTRESS; STRESS; SUPPORT	10.1080/07448481.2022.2114803	ARTICLE	ADAPTATION; PSYCHOLOGICAL; ADOLESCENT; ADULT; CANADA; COPING SKILLS; FEMALE; HUMANS; MALE; MENTAL HEALTH; SOCIAL SUPPORT; STRESS; PSYCHOLOGICAL; STUDENTS; SURVEYS AND QUESTIONNAIRES; UNIVERSITIES; YOUNG ADULT; ADOLESCENT; ADULT; CANADA; COPING; FEMALE; HUMAN; MALE; MENTAL HEALTH; MENTAL STRESS; ORGANIZATION AND MANAGEMENT; PSYCHOLOGICAL ADJUSTMENT; PSYCHOLOGY; QUESTIONNAIRE; SOCIAL SUPPORT; STUDE…	J AM COLL HEALTH	J. AM. COLL. HEALTH	ENGLISH	ROUTLEDGE	2024	S.-P. CHEN; DEPARTMENT OF OCCUPATIONAL THERAPY, FACULTY OF REHABILITATION MEDICINE, COLLEGE OF HEALTH SCIENCES, UNIVERSITY OF ALBERTA, EDMONTON, CANADA; EMAIL: SHUPING2@UALBERTA.CA	7448481	JOURNAL OF AMERICAN COLLEGE HEALTH	8	MENTAL HEALTH COPING STRATEGIES AND SOCIAL SUPPORT AMONG INTERNATIONAL STUDENTS AT A CANADIAN UNIVERSITY	72	ISI	UNIVERSITY OF ALBERTA	NOTREPORTED;UNIVERSITY OF ALBERTA;NOTREPORTED	BAGHOORI D, 2024, J AM COLL HEALTH	BAGHOORI D, 2024, J AM COLL HEALTH
GEARING R;BREWER K;CHEUNG M;LEUNG P;CHEN W;HE X	none	CHINA ACCOUNTS FOR AN ESTIMATED THIRD OF THE WORLD?S SUICIDES, YET INDIVIDUALS EXPERIENCING SUICIDALITY TYPICALLY DO NOT SEEK OUT OR RECEIVE TREATMENT. THIS STUDY EXAMINES COMMUNITY PERCEPTIONS AND PUBLIC STIGMA TOWARD SUICIDE. IN SHANGHAI, CHINA 186 ADULTS WERE RECRUITED TO PARTICIPATE IN A SURVEY WITH AN EXPERIMENTAL VIGNETTE DESCRIBING A SUICIDAL INDIVIDUAL, MANIPULATED ON GENDER AND AGE, FOLL…	CENTER FOR MENTAL HEALTH RESEARCH AND INNOVATION IN TREATMENT ENGAGEMENT AND SERVICE (MH-RITES CENTER), UNIVERSITY OF HOUSTON, GRADUATE COLLEGE OF SOCIAL WORK, HOUSTON, TX, UNITED STATES; COLLEGE OF HEALTH AND HUMAN SERVICES, UNIVERSITY OF NEW HAMPSHIRE, DURHAM, NH, UNITED STATES; GRADUATE COLLEGE OF SOCIAL WORK, UNIVERSITY OF HOUSTON, HOUSTON, TX, UNITED STATES; UNIVERSITY OF SCIENCE AND TECHNOL…	CHINA; HELP SEEKING; PROFESSIONAL SUPPORT; PUBLIC PERCEPTION; STIGMA; SUICIDALITY; SUICIDE	10.1177/0030222821991313	ARTICLE	ADOLESCENT; ADULT; CHINA; FEMALE; HUMANS; MALE; SOCIAL STIGMA; SUICIDAL IDEATION; SUICIDE; SURVEYS AND QUESTIONNAIRES; ADOLESCENT; ADULT; CHINA; FEMALE; HUMAN; MALE; QUESTIONNAIRE; SOCIAL STIGMA; SUICIDAL IDEATION; SUICIDE	OMEGA	OMEGA	ENGLISH	SAGE PUBLICATIONS INC.	2023	R.E. GEARING; CENTER FOR MENTAL HEALTH RESEARCH AND INNOVATION IN TREATMENT ENGAGEMENT AND SERVICE (MH-RITES CENTER), UNIVERSITY OF HOUSTON, GRADUATE COLLEGE OF SOCIAL WORK, HOUSTON, UNITED STATES; EMAIL: RGEARING@UH.EDU	302228	OMEGA (UNITED STATES)	12	SUICIDE IN CHINA COMMUNITY ATTITUDES AND STIGMA	86	ISI	UNIVERSITY OF HOUSTON;UNIVERSITY OF NEW HAMPSHIRE;UNIVERSITY OF HOUSTON;UNIVERSITY OF SCIENCE AND TECHNOLOGY;EAST CHINA UNIVERSITY OF SCIENCE AND TECHNOLOGY	NOTREPORTED;UNIVERSITY OF HOUSTON;NOTREPORTED	GEARING RE, 2023, OMEGA	GEARING RE, 2023, OMEGA
VERHOOG S;EIJGERMANS D;FANG Y;BRAMER W;RAAT H;JANSEN W	none	DETERMINANTS AT THE CONTEXTUAL LEVEL ARE IMPORTANT FOR CHILDREN?S AND ADOLESCENTS? MENTAL HEALTH CARE UTILIZATION, AS THIS IS THE LEVEL WHERE POLICY MAKERS AND CARE PROVIDERS CAN INTERVENE TO IMPROVE ACCESS TO AND PROVISION OF CARE. THE OBJECTIVE OF THIS REVIEW WAS TO SUMMARIZE THE EVIDENCE ON CONTEXTUAL DETERMINANTS ASSOCIATED WITH MENTAL HEALTH CARE UTILIZATION IN CHILDREN AND ADOLESCENTS. A SY…	DEPARTMENT OF PUBLIC HEALTH, ERASMUS MC, UNIVERSITY MEDICAL CENTRE, P.O. BOX 2040, ROTTERDAM, 3000 CA, NETHERLANDS; THE GENERATION R STUDY GROUP, ERASMUS MC, UNIVERSITY MEDICAL CENTRE, ROTTERDAM, NETHERLANDS; MEDICAL LIBRARY, ERASMUS MC, UNIVERSITY MEDICAL CENTRE, ROTTERDAM, NETHERLANDS; DEPARTMENT OF SOCIAL DEVELOPMENT, CITY OF ROTTERDAM, ROTTERDAM, NETHERLANDS	ADOLESCENT; CHILD; PATIENT ACCEPTANCE OF HEALTH CARE; PSYCHOTHERAPY; SOCIAL CLASS; URBAN POPULATION	10.1007/s00787-022-02077-5	REVIEW	ADOLESCENT; ADOLESCENT HEALTH SERVICES; CHILD; HEALTH SERVICES ACCESSIBILITY; HUMANS; MENTAL DISORDERS; MENTAL HEALTH SERVICES; PATIENT ACCEPTANCE OF HEALTH CARE; ACADEMIC ACHIEVEMENT; ADOLESCENT; CHILD; COMMUNITY CARE; CONTROLLED STUDY; DATA BASE; DATA EXTRACTION; DATA SYNTHESIS; DISADVANTAGED POPULATION; DISEASE ASSOCIATION; EVIDENCE BASED PRACTICE; HEALTH CARE ACCESS; HEALTH CARE FINANCING; HE…	EUR CHILD ADOLESC PSYCHIATRY	EUR. CHILD ADOLESC. PSYCHIATRY	ENGLISH	SPRINGER SCIENCE AND BUSINESS MEDIA DEUTSCHLAND GMBH	2024	W. JANSEN; DEPARTMENT OF PUBLIC HEALTH, ERASMUS MC, UNIVERSITY MEDICAL CENTRE, ROTTERDAM, P.O. BOX 2040, 3000 CA, NETHERLANDS; EMAIL: W.JANSEN.1@ERASMUSMC.NL	10188827	EUROPEAN CHILD AND ADOLESCENT PSYCHIATRY	12	CONTEXTUAL DETERMINANTS ASSOCIATED WITH CHILDRENS AND ADOLESCENTS MENTAL HEALTH CARE UTILIZATION A SYSTEMATIC REVIEW	33	ISI	UNIVERSITY MEDICAL CENTRE;UNIVERSITY MEDICAL CENTRE;UNIVERSITY MEDICAL CENTRE	NOTREPORTED;UNIVERSITY MEDICAL CENTRE;NOTREPORTED	VERHOOG S, 2024, EUR CHILD ADOLESC PSYCHIATRY	VERHOOG S, 2024, EUR CHILD ADOLESC PSYCHIATRY
ISHFAQ N;KAMAL A	none	THIS STUDY EXPLAINED COMORBID PSYCHIATRIC SYMPTOMS (CPS) THROUGH OBSESSIVE?COMPULSIVE PERSONALITY TRAITS (OCPT). THROUGH SELF-REPORTED QUESTIONNAIRES, DATA WERE COLLECTED FROM 179 CONVICTS IN THE CENTRAL JAIL SAHIWAL, PUNJAB, PAKISTAN. THE FINDINGS OF THE STUDY SHOWED THAT OBSESSIVE?COMPULSIVE PERSONALITY DISORDER BASED ON PERSONALITY INVENTORY FOR DSM-5 SHORT FORM SHOWED A GOOD CONSTRUCT VALIDIT…	NATIONAL INSTITUTE OF PSYCHOLOGY, QUAID-I-AZAM UNIVERSITY, ISLAMABAD, PAKISTAN; RAWALPINDI WOMEN UNIVERSITY, RAWALPINDI, PAKISTAN; SCHOOL OF PROFESSIONAL PSYCHOLOGY, BAHRIA UNIVERSITY, E8 CAMPUS, ISLAMABAD, PAKISTAN	COMORBID PSYCHIATRIC SYMPTOMS; IMPRISONMENT; OBSESSIVE COMPULSIVE PERSONALITY; PERSONALITY FUNCTIONING	10.1007/s12646-024-00788-0	ARTICLE		PSYCOL STUD	PSYCOL. STUD.	ENGLISH	SPRINGER	2024	N. ISHFAQ; NATIONAL INSTITUTE OF PSYCHOLOGY, QUAID-I-AZAM UNIVERSITY, ISLAMABAD, PAKISTAN; EMAIL: NIMRAH_ISHFAQ@HOTMAIL.COM	332968	PSYCHOLOGICAL STUDIES	0	EXPLAINING THE RELATIONSHIP BETWEEN OBSESSIVECOMPULSIVE PERSONALITY TRAITS AND COMORBID PSYCHIATRIC SYMPTOMS AMONG CONVICTS PAKISTAN	69	ISI	QUAID-I-AZAM UNIVERSITY;RAWALPINDI WOMEN UNIVERSITY;BAHRIA UNIVERSITY	NOTREPORTED;QUAID-I-AZAM UNIVERSITY;NOTREPORTED	ISHFAQ N, 2024, PSYCOL STUD	ISHFAQ N, 2024, PSYCOL STUD
MEDEIROS S;COELHO R;MILLETT C;SARACENI V;COELI C;TRAJMAN A;RASELLA D;DUROVNI B;HONE T	none	INTRODUCTION MENTAL HEALTH INEQUALITIES ACROSS RACIAL AND ETHNIC GROUPS ARE LARGE AND UNJUST IN MANY COUNTRIES, YET THESE INEQUALITIES REMAIN UNDER-RESEARCHED, PARTICULARLY IN LOW-INCOME AND MIDDLE-INCOME COUNTRIES SUCH AS BRAZIL. THIS STUDY INVESTIGATES RACIAL AND SOCIOECONOMIC INEQUALITIES IN PRIMARY HEALTHCARE USAGE, HOSPITALISATION AND MORTALITY FOR MENTAL HEALTH DISORDERS IN RIO DE JANEIRO, …	PUBLIC HEALTH POLICY EVALUATION UNIT, SCHOOL OF PUBLIC HEALTH, IMPERIAL COLLEGE LONDON, LONDON, UNITED KINGDOM; INSTITUTO DE ESTUDOS PARA POL?TICAS DE SA?DE, S?O PAULO, BRAZIL; NOVA NATIONAL SCHOOL OF PUBLIC HEALTH, PUBLIC HEALTH RESEARCH CENTRE, COMPREHENSIVE HEALTH RESEARCH CENTER, NOVA UNIVERSITY LISBON, LISBOA, PORTUGAL; HEALTH SURVEILLANCE BRANCH, SECRETARIA MUNICIPAL DE SA?DE DO RIO DE JANE…		10.1136/bmjgh-2023-013327	ARTICLE	ADOLESCENT; ADULT; ADVERSE OUTCOME; AGED; ANXIETY DISORDER; ARTICLE; BRAZILIAN; COHORT ANALYSIS; CONSULTATION; CONTROLLED STUDY; CROSS-SECTIONAL STUDY; DISABILITY; EDUCATIONAL STATUS; ETHNIC GROUP; FEMALE; HEALTH CARE UTILIZATION; HEALTH DISPARITY; HOSPITALIZATION; HOUSEHOLD INCOME; HUMAN; LOWEST INCOME GROUP; MAJOR CLINICAL STUDY; MALE; MENTAL DISEASE; MENTAL HEALTH; MENTAL HEALTH CARE; MENTAL H…	BMJ GLOB HEALTH	BMJ GLOB. HEALTH	ENGLISH	BMJ PUBLISHING GROUP	2023	S. MEDEIROS; PUBLIC HEALTH POLICY EVALUATION UNIT, SCHOOL OF PUBLIC HEALTH, IMPERIAL COLLEGE LONDON, LONDON, UNITED KINGDOM; EMAIL: SOPHIA.MEDEIROS21@IMPERIAL.AC.UK	20597908	BMJ GLOBAL HEALTH	1	RACIAL INEQUALITIES IN MENTAL HEALTHCARE USE AND MORTALITY A CROSSSECTIONAL ANALYSIS OF 12 MILLION LOWINCOME INDIVIDUALS IN RIO DE JANEIRO BRAZIL 20102016	8	ISI	IMPERIAL COLLEGE LONDON;INSTITUTO DE ESTUDOS PARA POL?TICAS DE SA?DE;NOVA UNIVERSITY LISBON;HEALTH SURVEILLANCE BRANCH;UNIVERSIDADE FEDERAL DO RIO DE JANEIRO;UNIVERSIDADE FEDERAL DO RIO DE JANEIRO;UNIVERSIDADE FEDERAL DA BAHIA;CENTRO DE ESTUDOS ESTRATÂGICOS	NOTREPORTED;IMPERIAL COLLEGE LONDON;NOTREPORTED	MEDEIROS S, 2023, BMJ GLOB HEALTH	MEDEIROS S, 2023, BMJ GLOB HEALTH
MA C;LUO H;LEUNG S;WONG G;LAM R;BASTIAMPILLAI T;CHEN E;CHAN S	none	BACKGROUND: THERE IS A LACK OF REAL-LIFE POPULATION-BASED STUDY EXAMINING THE EFFECT OF COMMUNITY MENTAL HEALTH SERVICES ON PSYCHIATRIC EMERGENCY ADMISSION. IN HONG KONG, INTEGRATED COMMUNITY CENTER FOR MENTAL WELLNESS (ICCMW) AND TELECARE SERVICE WERE INTRODUCED IN 2009 AND 2012, RESPECTIVELY. WE EXAMINED THE REAL-LIFE IMPACT OF THESE SERVICES ON PSYCHIATRIC EMERGENCY ADMISSIONS OVER 20 YEARS. M…	DEPARTMENT OF PSYCHIATRY, LI KA SHING FACULTY OF MEDICINE, THE UNIVERSITY OF HONG KONG, HONG KONG SPECIAL ADMINISTRATIVE REGION, HONG KONG; SCHOOL OF NURSING, THE HONG KONG POLYTECHNIC UNIVERSITY, HONG KONG SPECIAL ADMINISTRATIVE REGION, HONG KONG; DEPARTMENT OF SOCIAL WORK AND SOCIAL ADMINISTRATION, FACULTY OF SOCIAL SCIENCE, THE UNIVERSITY OF HONG KONG, HONG KONG SPECIAL ADMINISTRATIVE REGION, …	COMMUNITY MENTAL HEALTH SERVICES; PANDEMIC; PSYCHIATRIC EMERGENCY ADMISSION; SEASONALITY; UNEMPLOYMENT	10.1016/j.lanwpc.2023.100814	ARTICLE	ADULT; AGE; ARTICLE; AUTUMN; BIPOLAR DISORDER; COMMUNITY MENTAL HEALTH SERVICE; CONTROLLED STUDY; CORONAVIRUS DISEASE 2019; DRUG DEPENDENCE; FEMALE; GENDER; HONG KONG; HOSPITAL ADMISSION; HUMAN; LONGITUDINAL STUDY; MAJOR CLINICAL STUDY; MAJOR DEPRESSION; MALE; NEUROSIS; POPULATION RESEARCH; PSYCHIATRIC DIAGNOSIS; PSYCHIATRIC EMERGENCY; RETROSPECTIVE STUDY; SCHIZOPHRENIA SPECTRUM DISORDER; SEVERE …	LANCET REG HEALTH WEST PAC	LANCET. REG. HEALTH. WEST. PAC.	ENGLISH	ELSEVIER LTD	2023	S.K.W. CHAN; ROOM 219, NEW CLINICAL BUILDING, DEPARTMENT OF PSYCHIATRY, THE UNIVERSITY OF HONG KONG, QUEEN MARY HOSPITAL, HONG KONG, 102 POKFULAM ROAD, HONG KONG; EMAIL: KWSHERRY@HKU.HK	26666065	THE LANCET REGIONAL HEALTH - WESTERN PACIFIC	5	IMPACT OF COMMUNITY MENTAL HEALTH SERVICES ON THE ADULT PSYCHIATRIC ADMISSION THROUGH THE EMERGENCY UNIT A 20YEAR POPULATIONBASED STUDY	39	ISI	THE UNIVERSITY OF HONG KONG;THE HONG KONG POLYTECHNIC UNIVERSITY;THE UNIVERSITY OF HONG KONG;THE UNIVERSITY OF HONG KONG;FLINDERS UNIVERSITY;THE UNIVERSITY OF HONG KONG	NOTREPORTED;THE UNIVERSITY OF HONG KONG;NOTREPORTED	MA CF, 2023, LANCET REG HEALTH WEST PAC	MA CF, 2023, LANCET REG HEALTH WEST PAC
VIKHANOVA A;TIBBER M;MARESCHAL I	none	PREVIOUS RESEARCH HAS FOUND ASSOCIATIONS BETWEEN MENTAL HEALTH DIFFICULTIES AND INTERPRETATION BIASES, INCLUDING HEIGHTENED INTERPRETATION OF THREAT FROM NEUTRAL OR AMBIGUOUS STIMULI. BUILDING ON THIS RESEARCH, WE EXPLORED ASSOCIATIONS BETWEEN INTERPRETATION BIASES (POSITIVE AND NEGATIVE) AND THREE CONSTRUCTS THAT HAVE BEEN LINKED TO MIGRANT EXPERIENCE: MENTAL HEALTH SYMPTOMS (GLOBAL SEVERITY IND…	DEPARTMENT OF PSYCHOLOGY, SCHOOL OF BIOLOGICAL AND CHEMICAL SCIENCES, QUEEN MARY UNIVERSITY OF LONDON, LONDON, UNITED KINGDOM; RESEARCH DEPARTMENT OF CLINICAL, EDUCATIONAL AND HEALTH PSYCHOLOGY, UNIVERSITY COLLEGE LONDON, LONDON, UNITED KINGDOM	BIOLOGICAL MOTION; COGNITIVE BIASES; DISCRIMINATION; MENTAL HEALTH; MIGRATION	10.1177/17470218231191442	ARTICLE	ADOLESCENT; ADULT; BIAS; FEMALE; HUMANS; MALE; MENTAL HEALTH; SOCIAL PERCEPTION; SURVEYS AND QUESTIONNAIRES; TRANSIENTS AND MIGRANTS; YOUNG ADULT; ADOLESCENT; ADULT; FEMALE; HUMAN; MALE; MENTAL HEALTH; MIGRATION; PERCEPTION; PSYCHOLOGY; QUESTIONNAIRE; STATISTICAL BIAS; YOUNG ADULT	Q J EXP PSYCHOL	Q. J. EXP. PSYCHOL.	ENGLISH	SAGE PUBLICATIONS LTD	2024	A. VIKHANOVA; DEPARTMENT OF PSYCHOLOGY, SCHOOL OF BIOLOGICAL AND CHEMICAL SCIENCES, QUEEN MARY UNIVERSITY OF LONDON, LONDON, UNITED KINGDOM; EMAIL: A.VIKHANOVA@QMUL.AC.UK	17470218	QUARTERLY JOURNAL OF EXPERIMENTAL PSYCHOLOGY	0	POSTMIGRATION LIVING DIFFICULTIES AND POOR MENTAL HEALTH ASSOCIATED WITH INCREASED INTERPRETATION BIAS FOR THREAT	77	ISI	QUEEN MARY UNIVERSITY OF LONDON;UNIVERSITY COLLEGE LONDON	NOTREPORTED;QUEEN MARY UNIVERSITY OF LONDON;NOTREPORTED	VIKHANOVA A, 2024, Q J EXP PSYCHOL	VIKHANOVA A, 2024, Q J EXP PSYCHOL
WHITEFORD H;BAGHERI N;DIMINIC S;ENTICOTT J;GAO C;HAMILTON M;HICKIE I;KHANH-DAO L L;LEE Y;LONG K;MCGORRY P;MEADOWS G;MIHALOPOULOS C;OCCHIPINTI J;ROCK D;ROSENBERG S;SALVADOR-CARULLA L;SKINNER A	none	AUSTRALIA?S FIFTH NATIONAL MENTAL HEALTH PLAN REQUIRED GOVERNMENTS TO REPORT, NOT ONLY ON THE PROGRESS OF CHANGES TO MENTAL HEALTH SERVICE DELIVERY, BUT TO ALSO PLAN FOR SERVICES THAT SHOULD BE PROVIDED. FUTURE POPULATION DEMAND FOR TREATMENT AND CARE IS CHALLENGING TO PREDICT AND ONE SOLUTION INVOLVES MODELLING THE UNCERTAIN DEMANDS ON THE SYSTEM. MODELLING CAN HELP DECISION-MAKERS UNDERSTAND LI…	QUEENSLAND CENTRE FOR MENTAL HEALTH RESEARCH, WACOL, QLD, AUSTRALIA; SCHOOL OF PUBLIC HEALTH, THE UNIVERSITY OF QUEENSLAND, HERSTON, QLD, AUSTRALIA; MENTAL HEALTH POLICY UNIT, HEALTH RESEARCH INSTITUTE, UNIVERSITY OF CANBERRA, AUSTRALIA; SOUTHERN SYNERGY, MONASH CENTRE OF HEALTH RESEARCH & IMPLEMENTATION, MONASH UNIVERSITY, DANDENONG, VIC, AUSTRALIA; CENTRE FOR YOUTH MENTAL HEALTH, THE UNIVERSITY…	MENTAL HEALTH PLANNING; MODELLING; SERVICE DELIVERY	10.1177/00048674231172113	REVIEW	AUSTRALIA; GOVERNMENT PROGRAMS; HEALTH CARE REFORM; HUMANS; MENTAL HEALTH; MENTAL HEALTH SERVICES; AUSTRALIA; AUSTRALIAN; HEALTH CARE DELIVERY; HUMAN; HUMAN EXPERIMENT; INVESTMENT; MENTAL HEALTH; REVIEW; AUSTRALIA; GOVERNMENT; HEALTH CARE POLICY; MENTAL HEALTH SERVICE	AUST NEW ZEALAND J PSYCHIATRY	AUST. NEW ZEALAND J. PSYCHIATRY	ENGLISH	SAGE PUBLICATIONS INC.	2023	H. WHITEFORD; QUEENSLAND CENTRE FOR MENTAL HEALTH RESEARCH, WACOL, AUSTRALIA; EMAIL: H.WHITEFORD@SPH.UQ.EDU.AU	48674	AUSTRALIAN AND NEW ZEALAND JOURNAL OF PSYCHIATRY	6	MENTAL HEALTH SYSTEMS MODELLING FOR EVIDENCEINFORMED SERVICE REFORM IN AUSTRALIA	57	ISI	QUEENSLAND CENTRE FOR MENTAL HEALTH RESEARCH;THE UNIVERSITY OF QUEENSLAND;UNIVERSITY OF CANBERRA;MONASH UNIVERSITY;THE UNIVERSITY OF MELBOURNE;MONASH UNIVERSITY;THE UNIVERSITY OF SYDNEY;MONASH UNIVERSITY;MONASH UNIVERSITY;MONASH UNIVERSITY;UNIVERSITY OF SYDNEY;WA PRIMARY HEALTH ALLIANCE;MEDICAL SCHOOL UNIVERSITY OF WESTERN AUSTRALIA;UNIVERSITY OF CANBERRA;UNIVERSITY OF SYDNEY;UNIVERSITY OF CANBER…	NOTREPORTED;QUEENSLAND CENTRE FOR MENTAL HEALTH RESEARCH;NOTREPORTED	WHITEFORD H, 2023, AUST NEW ZEALAND J PSYCHIATRY	WHITEFORD H, 2023, AUST NEW ZEALAND J PSYCHIATRY
BUSCH C;MOHAMMED T;NADILE E;COOPER K	none	DEPRESSION IS A TOP MENTAL HEALTH CONCERN AMONG COLLEGE STUDENTS, YET THERE IS A LACK OF RESEARCH EXPLORING HOW ONLINE COLLEGE SCIENCE COURSES CAN EXACERBATE OR ALLEVIATE THEIR DEPRESSION. WE SURVEYED 2,175 UNDERGRADUATES AT A LARGE RESEARCH-INTENSIVE INSTITUTION ABOUT THE SEVERITY OF THEIR DEPRESSION IN LARGE-ENROLLMENT ONLINE SCIENCE COURSES. THE SURVEY ALSO EXPLORED ASPECTS OF ONLINE SCIENCE C…	RESEARCH FOR INCLUSIVE STEM EDUCATION CENTER, SCHOOL OF LIFE SCIENCES, ARIZONA STATE UNIVERSITY, TEMPE, AZ, UNITED STATES		10.1371/journal.pone.0269201	ARTICLE	DEPRESSION; EDUCATION; DISTANCE; EDUCATIONAL STATUS; HUMANS; STUDENTS; UNIVERSITIES; ARTICLE; COLLEGE STUDENT; CORONAVIRUS DISEASE 2019; DATA ANALYSIS; DEPRESSION; E-LEARNING; FEMALE; HEALTH SURVEY; HUMAN; LGBTQIA+ PEOPLE; MALE; SEX DIFFERENCE; UNDERGRADUATE EDUCATION; EDUCATION; EDUCATIONAL STATUS; PSYCHOLOGY; STUDENT; UNIVERSITY	PLOS ONE	PLOS ONE	ENGLISH	PUBLIC LIBRARY OF SCIENCE	2022	K.M. COOPER; RESEARCH FOR INCLUSIVE STEM EDUCATION CENTER, SCHOOL OF LIFE SCIENCES, ARIZONA STATE UNIVERSITY, TEMPE, UNITED STATES; EMAIL: KATELYN.COOPER@ASU.EDU	19326203	PLOS ONE	11	ASPECTS OF ONLINE COLLEGE SCIENCE COURSES THAT ALLEVIATE AND EXACERBATE UNDERGRADUATE DEPRESSION	17	ISI	ARIZONA STATE UNIVERSITY	NOTREPORTED;ARIZONA STATE UNIVERSITY;NOTREPORTED	BUSCH CA, 2022, PLOS ONE	BUSCH CA, 2022, PLOS ONE
PERITOGIANNIS V;ROUSOUDI S;VORVOLAKOS T;GIOTI P;GOGOU A;ARRE A;SAMAKOURI M	none	BACKGROUND: MENTAL HEALTHCARE SERVICE DELIVERY IN RURAL AND REMOTE AREAS IN GREECE IS CHALLENGING DUE TO SOCIOECONOMIC AND GEOGRAPHICAL REASONS, AND DISTANT FACILITIES. TO ADDRESS THE NEEDS OF THE UNDERSERVED AREAS, THE GREEK STATE HAS LAUNCHED A NUMBER OF MOBILE MENTAL HEALTH UNITS (MMHUS). AIM: THE OBJECTIVE OF THE PRESENT STUDY WAS TO EXPLORE THE DIFFERENCES AMONG TWO MMHUS, ONE BEING RUN BY A…	MOBILE MENTAL HEALTH UNIT, PREFECTURES OF IOANNINA AND THESPROTIA, SOCIETY FOR THE PROMOTION OF MENTAL HEALTH IN EPIRUS, IOANNINA, GREECE; POSTGRADUATE PROGRAM IN SOCIAL PSYCHIATRY, DEMOCRITUS UNIVERSITY OF THRACE, ALEXANDROUPOLIS, GREECE; DEPARTMENT OF PSYCHIATRY, MEDICAL SCHOOL, DEMOCRITUS UNIVERSITY OF THRACE, ALEXANDROUPOLIS, GREECE; DEPARTMENT OF PSYCHIATRY, UNIVERSITY GENERAL HOSPITAL OF AL…	COMMUNITY MENTAL HEALTH SERVICES; MOBILE MENTAL HEALTH UNITS; RURAL AREAS; SCHIZOPHRENIA SPECTRUM DISORDERS	10.1177/0020764020985896	ARTICLE	AGED; GREECE; HUMANS; MENTAL HEALTH; MENTAL HEALTH SERVICES; MIDDLE AGED; PSYCHOTIC DISORDERS; RURAL HEALTH SERVICES; SCHIZOPHRENIA; AGED; EPIDEMIOLOGY; GREECE; HUMAN; MENTAL HEALTH; MENTAL HEALTH SERVICE; MIDDLE AGED; PSYCHOSIS; RURAL HEALTH CARE; SCHIZOPHRENIA	INT J SOC PSYCHIATRY	INT. J. SOC. PSYCHIATRY	ENGLISH	SAGE PUBLICATIONS LTD	2022	V. PERITOGIANNIS; MOBILE MENTAL HEALTH UNIT, PREFECTURES OF IOANNINA AND THESPROTIA, SOCIETY FOR THE PROMOTION OF MENTAL HEALTH IN EPIRUS, IOANNINA, GREECE; EMAIL: VAIOS.PERITOGIANNIS@MEDAI.GR	207640	INTERNATIONAL JOURNAL OF SOCIAL PSYCHIATRY	6	A COMPARATIVE STUDY OF TWO MOBILE MENTAL HEALTH UNITS IN DIFFERENT CATCHMENT RURAL AREAS IN GREECE	68	ISI	PREFECTURES OF IOANNINA AND THESPROTIA;DEMOCRITUS UNIVERSITY OF THRACE;DEMOCRITUS UNIVERSITY OF THRACE;UNIVERSITY GENERAL HOSPITAL OF ALEXANDROUPOLIS;DEMOCRITUS UNIVERSITY OF THRACE	NOTREPORTED;PREFECTURES OF IOANNINA AND THESPROTIA;NOTREPORTED	PERITOGIANNIS V, 2022, INT J SOC PSYCHIATRY	PERITOGIANNIS V, 2022, INT J SOC PSYCHIATRY
VAGIRI R;LEBOHO P;DESRY L;KHUTSO M;PFUNZO M	none	ONE OUT OF EVERY FOUR PEOPLE IN THEIR LIVES CAN BE AFFECTED BY MENTAL HEALTH PROBLEMS THAT ALTER THEIR FUNCTIONING, BEHAVIOUR, AND THINKING PATTERNS. IN RECENT YEARS, THERE HAS BEEN AN INCREASE IN MENTAL HEALTH DISORDERS AMONG STUDENTS WORLDWIDE. POSITIVE MENTAL HEALTH (PMH) HAS GAINED RELEVANCE IN TODAY?S FAST-PACED AND DEMANDING WORLD, ESPECIALLY FOR UNIVERSITY STUDENTS, AS IT AFFECTS THEIR ABI…	DEPARTMENT OF PHARMACY, FACULTY OF HEALTH SCIENCES, UNIVERSITY OF LIMPOPO, LIMPOPO PROVINCE, MANKWENG, SOUTH AFRICA		10.1371/journal.pgph.0002855	ARTICLE		PLOS GLOB PUBLIC HEALTH	PLOS. GLOB. PUBLIC HEALTH.	ENGLISH	PUBLIC LIBRARY OF SCIENCE	2024	R.V. VAGIRI; DEPARTMENT OF PHARMACY, FACULTY OF HEALTH SCIENCES, UNIVERSITY OF LIMPOPO, MANKWENG, LIMPOPO PROVINCE, SOUTH AFRICA; EMAIL: RAJESH.VAGIRI@UL.AC.ZA	27673375	PLOS GLOBAL PUBLIC HEALTH	0	INVESTIGATION OF POSITIVE MENTAL HEALTH LEVELS AMONG FACULTY OF HEALTH SCIENCES STUDENTS AT A RURAL UNIVERSITY IN SOUTH AFRICA	4	ISI	UNIVERSITY OF LIMPOPO	NOTREPORTED;UNIVERSITY OF LIMPOPO;NOTREPORTED	VAGIRI RV, 2024, PLOS GLOB PUBLIC HEALTH	VAGIRI RV, 2024, PLOS GLOB PUBLIC HEALTH
TEIGLAND C;MOHAMMADI I;AGATEP B;BOSKOVIC D;VELLIGAN D	none	BACKGROUND: THE RELATIONSHIP OF PATIENT CHARACTERISTICS AND SOCIAL DETERMINANTS OF HEALTH (SDOH) WITH HOSPITALIZATIONS AND COSTS IN PATIENTS WITH MAJOR DEPRESSIVE DISORDER (MDD) HAS NOT BEEN ASSESSED USING REAL-WORLD DATA. OBJECTIVE: TO IDENTIFY FACTORS ASSOCIATED WITH HIGHER HOSPITALIZATIONS AND COSTS IN PATIENTS WITH MDD. METHODS: A RETROSPECTIVE OBSERVATIONAL STUDY IDENTIFIED PATIENTS AGED 18 …	INOVALON, DATA SOLUTIONS, BOWIE, MD, UNITED STATES; OTSUKA PHARMACEUTICAL, INC., GLOBAL VALUE AND REAL WORLD EVIDENCE, PRINCETON, NJ, UNITED STATES; DEPARTMENT OF PSYCHIATRY, UNIVERSITY OF TEXAS HEALTH SCIENCE CENTER, SAN ANTONIO, UNITED STATES		10.18553/jmcp.2024.30.9.978	ARTICLE	ADOLESCENT; ADULT; AGED; DEPRESSIVE DISORDER; MAJOR; FEMALE; HEALTH CARE COSTS; HOSPITALIZATION; HUMANS; INSURANCE; HEALTH; MALE; MEDICAID; MIDDLE AGED; RETROSPECTIVE STUDIES; SOCIAL DETERMINANTS OF HEALTH; UNITED STATES; YOUNG ADULT; ANTIDEPRESSANT AGENT; ANXIOLYTIC AGENT; NEUROLEPTIC AGENT; ADULT; AGED; ARTICLE; ASTHMA; COHORT ANALYSIS; COMORBIDITY; CONTROLLED STUDY; DIABETES MELLITUS; EDUCATIO…	J MANAG CARE SPEC PHARM	J. MANAG. CARE SPEC. PHARM.	ENGLISH	ACADEMY OF MANAGED CARE PHARMACY (AMCP)	2024	C. TEIGLAND; INOVALON, DATA SOLUTIONS, BOWIE, UNITED STATES; EMAIL: CHRISTIE.TEIGLAND@INOVALON.COM	23760540	JOURNAL OF MANAGED CARE AND SPECIALTY PHARMACY	0	RELATIONSHIP BETWEEN SOCIAL DETERMINANTS OF HEALTH AND HOSPITALIZATIONS AND COSTS IN PATIENTS WITH MAJOR DEPRESSIVE DISORDER	30	ISI	UNIVERSITY OF TEXAS HEALTH SCIENCE CENTER	NOTREPORTED;NOTREPORTED;NOTREPORTED	TEIGLAND C, 2024, J MANAG CARE SPEC PHARM	TEIGLAND C, 2024, J MANAG CARE SPEC PHARM
HEO M;SONG E;JEON H;KIM K;NOH A;BARTELS M;STEVENS G;WALSH S;TORSHEIM T;ELGAR F;FINKENAUER C	none	OBJECTIVES: THIS STUDY EXAMINES THE FACTORS ASSOCIATED WITH ACCESS TO MENTAL HEALTHCARE SERVICES AMONG PEOPLE LIVING IN THE GOVERNMENT-CONTROLLED AREAS (GCAS) OF DONETSK AND LUHANSK OBLASTS IN UKRAINE. METHODS: THE 2020 UKRAINE MULTI-SECTOR NEEDS ASSESSMENT CONDUCTED BY REACH WAS SUBJECTED TO FREQUENCY ANALYSIS, PERCENTAGE ANALYSIS, AND BINARY LOGISTIC REGRESSION TO CONFIRM THE FACTORS ASSOCIATED…	DEPARTMENT OF HEALTH ADMINISTRATION, YONSEI UNIVERSITY GRADUATE SCHOOL, WONJU, SOUTH KOREA; DEPARTMENT OF HEALTHCARE MANAGEMENT, COLLEGE OF HEALTH SCIENCES, YOUNGSAN UNIVERSITY, YANGSAN, SOUTH KOREA; DEPARTMENT OF INTERNATIONAL HEALTHCARE MANAGEMENT, CATHOLIC UNIVERSITY OF DAEGU, GYEONGSAN, SOUTH KOREA; DIVISION OF HEALTH ADMINISTRATION, COLLEGE OF SOFTWARE AND DIGITAL HEALTHCARE CONVERGENCE, YON…	BORDERLINE; COVID-19; MENTAL HEALTH; UKRAINE; VULNERABILITY;ADOLESCENT MENTAL HEALTH; HBSC; NATIONAL POLICIES	10.3389/ijph.2023.1605890 10.1177/0272431619858413	ARTICLE ARTICLE	FAMILY CHARACTERISTICS; HEALTH EXPENDITURES; HEALTH SERVICES ACCESSIBILITY; HUMANS; MENTAL HEALTH SERVICES; UKRAINE; FAMILY STRUCTURE; HEALTH CARE ACCESS; HEALTH CARE COST; HUMAN; MENTAL HEALTH SERVICE; UKRAINE;ADOLESCENT; ADOLESCENT HEALTH; ADULT; AGGRESSION; ARTICLE; CHILD; HEALTH BEHAVIOR; HUMAN; INVESTMENT; LIFE SATISFACTION; MENTAL HEALTH; MULTILEVEL ANALYSIS; VIOLENCE; WELLBEING	INT J PUBLIC HEALTH J EARLY ADOLESC	INT. J. PUBLIC HEALTH J. EARLY ADOLESC.	ENGLISH ENGLISH	FRONTIERS MEDIA SA SAGE PUBLICATIONS INC.	2023	J.-W. NOH; DIVISION OF HEALTH ADMINISTRATION, COLLEGE OF SOFTWARE AND DIGITAL HEALTHCARE CONVERGENCE, YONSEI UNIVERSITY, WONJU, SOUTH KOREA; EMAIL: JINWON.NOH@GMAIL.COM A.M. HENDRIKS; VRIJE UNIVERSITEIT AMSTERDAM, NETHERLANDS; EMAIL: A.M.HENDRIKS@VU.NL	16618564 02724316	INTERNATIONAL JOURNAL OF PUBLIC HEALTH JOURNAL OF EARLY ADOLESCENCE	1	FACTORS ASSOCIATED WITH PEOPLES ACCESSIBILITY TO MENTAL HEALTHCARE SERVICES IN UKRAINE FOCUSING ON HOUSEHOLD HEAD VULNERABILITY NATIONAL CHILD AND ADOLESCENT HEALTH POLICIES AS INDICATORS OF ADOLESCENT MENTAL HEALTH A MULTILEVEL ANALYSIS OF 30 EUROPEAN COUNTRIES	68 40	ISI	YONSEI UNIVERSITY GRADUATE SCHOOL;YOUNGSAN UNIVERSITY;CATHOLIC UNIVERSITY OF DAEGU;YONSEI UNIVERSITY;VRIJE UNIVERSITEIT AMSTERDAM;AMSTERDAM PUBLIC HEALTH RESEARCH INSTITUTE;UTRECHT UNIVERSITY;BAR-ILAN UNIVERSITY;UNIVERSITY OF BERGEN;MCGILL UNIVERSITY	NOTREPORTED;YONSEI UNIVERSITY;NOTREPORTED;VRIJE UNIVERSITEIT AMSTERDAM;NOTREPORTED	HEO MH, 2023, INT J PUBLIC HEALTH J EARLY ADOLESC	HEO MH, 2023, INT J PUBLIC HEALTH J EARLY ADOLESC
ROENNFELDT H;WYDER M;BYRNE L;HILL N;RANDALL R;HAMILTON B	none	MENTAL HEALTH PRESENTATIONS TO THE EMERGENCY DEPARTMENT (ED) HAVE INCREASED, AND THE EMERGENCY DEPARTMENT HAS BECOME THE INITIAL CONTACT POINT FOR PEOPLE IN A MENTAL HEALTH CRISIS. HOWEVER, THERE IS MOUNTING EVIDENCE THAT THE ED IS NOT APPROPRIATE NOR EFFECTIVE IN RESPONDING TO PEOPLE IN MENTAL HEALTH CRISES. INSUFFICIENT ATTENTION HAS BEEN PAID TO THE SUBJECTIVE EXPERIENCE OF PEOPLE SEEKING SUPP…	CENTRE FOR MENTAL HEALTH NURSING, UNIVERSITY OF MELBOURNE, MELBOURNE, 3010, VIC, AUSTRALIA; RESEARCH AND LEARNING NETWORK, METRO SOUTH ADDICTION AND MENTAL HEALTH SERVICES, BRISBANE, 4122, QLD, AUSTRALIA; MENZIES HEALTH INSTITUTE QUEENSLAND, GRIFFITH UNIVERSITY, LOGAN CAMPUS, MEADOWBROOK, 4131, QLD, AUSTRALIA; SCHOOL OF MANAGEMENT, RMIT UNIVERSITY, MELBOURNE, 3000, VIC, AUSTRALIA; PROGRAM FOR REC…	EMERGENCY DEPARTMENT; MENTAL HEALTH CRISIS; MENTAL HEALTH EMERGENCY CARE; SUBJECTIVE EXPERIENCES	10.3390/ijerph18189650	REVIEW	EMERGENCY SERVICE; HOSPITAL; HUMANS; MENTAL HEALTH; DISEASE TREATMENT; HOSPITAL SECTOR; LITERATURE REVIEW; MENTAL HEALTH; PERCEPTION; DATA EXTRACTION; DECISION MAKING; EMERGENCY CARE; EMERGENCY WARD; EMOTION; FOLLOW UP; HEALTH CARE; HELP SEEKING BEHAVIOR; HUMAN; INJURY; MENTAL HEALTH; META ANALYSIS; NARRATIVE; PRIVACY; QUALITATIVE RESEARCH; REVIEW; SYSTEMATIC REVIEW; HOSPITAL EMERGENCY SERVICE	INT J ENVIRON RES PUBLIC HEALTH	INT. J. ENVIRON. RES. PUBLIC HEALTH	ENGLISH	MDPI	2021	H. ROENNFELDT; CENTRE FOR MENTAL HEALTH NURSING, UNIVERSITY OF MELBOURNE, MELBOURNE, 3010, AUSTRALIA; EMAIL: HROENNFELDT@STUDENT.UNIMELB.EDU.AU	16617827	INTERNATIONAL JOURNAL OF ENVIRONMENTAL RESEARCH AND PUBLIC HEALTH	32	SUBJECTIVE EXPERIENCES OF MENTAL HEALTH CRISIS CARE IN EMERGENCY DEPARTMENTS A NARRATIVE REVIEW OF THE QUALITATIVE LITERATURE	18	ISI	UNIVERSITY OF MELBOURNE;RESEARCH AND LEARNING NETWORK;GRIFFITH UNIVERSITY;RMIT UNIVERSITY;YALE SCHOOL OF MEDICINE;UNIVERSITY OF MELBOURNE	NOTREPORTED;UNIVERSITY OF MELBOURNE;NOTREPORTED	ROENNFELDT H, 2021, INT J ENVIRON RES PUBLIC HEALTH	ROENNFELDT H, 2021, INT J ENVIRON RES PUBLIC HEALTH
DAVIES S;JARDINE J;GUTRIDGE K;BERNARD Z;PARK S;DAWSON T;ABEL K;WHELAN P	none	BACKGROUND: THE INCIDENCE OF MENTAL HEALTH PROBLEMS IN CHILDREN AND ADOLESCENTS IN THE UNITED KINGDOM HAS SIGNIFICANTLY INCREASED IN RECENT YEARS, AND MORE PEOPLE ARE IN CONTACT WITH MENTAL HEALTH SERVICES IN GREATER MANCHESTER THAN IN OTHER PARTS OF THE COUNTRY. CHILDREN AND YOUNG PEOPLE SPEND MOST OF THEIR TIME AT SCHOOL AND WITH TEACHERS. THEREFORE, SCHOOLS AND OTHER EDUCATIONAL SETTINGS MAY B…	GM.DIGITAL RESEARCH UNIT, CENTRE FOR WOMEN'S MENTAL HEALTH, DIVISION OF PSYCHOLOGY AND MENTAL HEALTH, SCHOOL OF HEALTH SCIENCES, FACULTY OF BIOLOGY, MEDICINE AND HEALTH, THE UNIVERSITY OF MANCHESTER, MANCHESTER, UNITED KINGDOM; GREATER MANCHESTER MENTAL HEALTH NHS FOUNDATION TRUST, MANCHESTER ACADEMIC HEALTH SCIENCE CENTRE, MANCHESTER, UNITED KINGDOM; LEXPLORE LTD., MARPLE, UNITED KINGDOM; GM.DIG…	ACCEPTABILITY; CHILD AND ADOLESCENT MENTAL HEALTH AND WELL-BEING; DIGITAL ASSESSMENT AND MONITORING; DIGITAL MENTAL HEALTH; FEASIBILITY; PREVENTION; READING SCREENING OR ABILITY; SCHOOL-BASED MENTAL HEALTH CARE	10.2196/30668	ARTICLE		JMIR FORM RES	JMIR FORM. RES.	ENGLISH	JMIR PUBLICATIONS INC.	2021	S.M. DAVIES; GM.DIGITAL RESEARCH UNIT, CENTRE FOR WOMEN'S MENTAL HEALTH, DIVISION OF PSYCHOLOGY AND MENTAL HEALTH, SCHOOL OF HEALTH SCIENCES, FACULTY OF BIOLOGY, MEDICINE AND HEALTH, THE UNIVERSITY OF MANCHESTER, MANCHESTER, JEAN MCFARLANE BUILDING, OXFORD ROAD, M13 9PL, UNITED KINGDOM; EMAIL: SIAN.DAVIES-5@MANCHESTER.AC.UK	2561326X	JMIR FORMATIVE RESEARCH	4	PREVENTIVE DIGITAL MENTAL HEALTH FOR CHILDREN IN PRIMARY SCHOOLS ACCEPTABILITY AND FEASIBILITY STUDY	5	ISI	THE UNIVERSITY OF MANCHESTER;MANCHESTER ACADEMIC HEALTH SCIENCE CENTRE;THE UNIVERSITY OF MANCHESTER	NOTREPORTED;THE UNIVERSITY OF MANCHESTER;NOTREPORTED	DAVIES SM, 2021, JMIR FORM RES	DAVIES SM, 2021, JMIR FORM RES
SPRINGGATE B;AREVIAN A;WENNERSTROM A;JOHNSON A;EISENMAN D;SUGARMAN O;HAYWOOD C;TRAPIDO E;SHERBOURNE C;EVERETT A;MCCREARY M;MEYERS D;KATAOKA S;TANG L;SATO J;WELLS K	none	THIS MANUSCRIPT PRESENTS THE PROTOCOL AND PARTICIPATORY PLANNING PROCESS FOR IMPLEMENTING THE COMMUNITY RESILIENCE LEARNING COLLABORATIVE AND RESEARCH NETWORK (C-LEARN) STUDY. C-LEARN IS DESIGNED TO DETERMINE HOW TO BUILD A SERVICE PROGRAM AND INDIVIDUAL CLIENT CAPACITY TO IMPROVE MENTAL HEALTH-RELATED QUALITY OF LIFE AMONG INDIVIDUALS AT RISK FOR DEPRESSION, WITH EXPOSURE TO SOCIAL RISK FACTORS …	LSU HEALTH SCIENCES CENTER, NEW ORLEANS SCHOOL OF MEDICINE, NEW ORLEANS, 70112, LA, UNITED STATES; LSU HEALTH SCIENCES CENTER, NEW ORLEANS SCHOOL OF PUBLIC HEALTH, NEW ORLEANS, 70112, LA, UNITED STATES; UCLA SEMEL INSTITUTE FOR NEUROSCIENCE AND HUMAN BEHAVIOR, RESEARCH CENTER FOR HEALTH SERVICES AND SOCIETY, LOS ANGELES, 90024, CA, UNITED STATES; TULANE UNIVERSITY SCHOOL OF MEDICINE, NEW ORLEANS,…	COMMUNITY RESILIENCE; DISASTER RESILIENCE; MENTAL HEALTH; SOCIAL DETERMINANTS OF HEALTH	10.3390/ijerph15081683	ARTICLE	ADULT; COMMUNITY MENTAL HEALTH SERVICES; COMMUNITY-BASED PARTICIPATORY RESEARCH; DEPRESSION; HUMANS; LOUISIANA; QUALITY OF LIFE; RANDOMIZED CONTROLLED TRIALS AS TOPIC; RISK FACTORS; LOUISIANA; UNITED STATES; COMPARATIVE STUDY; DISASTER MANAGEMENT; LEARNING; LOCAL PARTICIPATION; MENTAL HEALTH; PARTICIPATORY APPROACH; QUALITY OF LIFE; RESEARCH; RISK FACTOR; ADULT; ARTICLE; CLINICAL PROTOCOL; COGNIT…	INT J ENVIRON RES PUBLIC HEALTH	INT. J. ENVIRON. RES. PUBLIC HEALTH	ENGLISH	MDPI AG	2018	B.F. SPRINGGATE; LSU HEALTH SCIENCES CENTER, NEW ORLEANS SCHOOL OF MEDICINE, NEW ORLEANS, 70112, UNITED STATES; EMAIL: BSPRI2@LSUHSC.EDU	16617827	INTERNATIONAL JOURNAL OF ENVIRONMENTAL RESEARCH AND PUBLIC HEALTH	20	COMMUNITY RESILIENCE LEARNING COLLABORATIVE AND RESEARCH NETWORK CLEARN STUDY PROTOCOL WITH PARTICIPATORY PLANNING FOR A RANDOMIZED COMPARATIVE EFFECTIVENESS TRIAL	15	ISI	NEW ORLEANS SCHOOL OF MEDICINE;NEW ORLEANS SCHOOL OF PUBLIC HEALTH;UCLA SEMEL INSTITUTE FOR NEUROSCIENCE AND HUMAN BEHAVIOR;TULANE UNIVERSITY SCHOOL OF MEDICINE;CENTER FOR SUSTAINABLE ENGAGEMENT AND DEVELOPMENT;DAVID GEFFEN SCHOOL OF MEDICINE AT UCLA;LOUISIANA COMMUNITY HEALTH OUTREACH NETWORK	NOTREPORTED;NEW ORLEANS SCHOOL OF MEDICINE;NOTREPORTED	SPRINGGATE BF, 2018, INT J ENVIRON RES PUBLIC HEALTH	SPRINGGATE BF, 2018, INT J ENVIRON RES PUBLIC HEALTH
LANGELLIER B;YANG Y;PURTLE J;NELSON K;STANKOV I;DIEZ R A	none	WE CONDUCTED A SYSTEMATIC REVIEW OF STUDIES EMPLOYING COMPLEX SYSTEMS APPROACHES (I.E., AGENT BASED AND SYSTEM DYNAMICS MODELS) TO UNDERSTAND DRIVERS OF MENTAL HEALTH AND INFORM MENTAL HEALTH POLICY. WE EXTRACTED KEY DATA (E.G., PURPOSE, DESIGN, DATA) FOR EACH STUDY AND PROVIDE A NARRATIVE SYNTHESIS OF INSIGHTS GENERATED ACROSS STUDIES. THE STUDIES INVESTIGATED DRIVERS AND POLICY INTERVENTION STR…	DEPARTMENT OF HEALTH MANAGEMENT AND POLICY, DORNSIFE SCHOOL OF PUBLIC HEALTH, DREXEL UNIVERSITY, PHILADELPHIA, PA, UNITED STATES; DIVISION OF SOCIAL AND BEHAVIORAL SCIENCE, SCHOOL OF PUBLIC HEALTH, THE UNIVERSITY OF MEMPHIS, MEMPHIS, TN, UNITED STATES; URBAN HEALTH COLLABORATIVE, DORNSIFE SCHOOL OF PUBLIC HEALTH, DREXEL UNIVERSITY, PHILADELPHIA, PA, UNITED STATES; DEPARTMENT OF EPIDEMIOLOGY AND B…	COMPLEX SYSTEMS; MENTAL HEALTH; PUBLIC POLICY; SYSTEMATIC REVIEW; SYSTEMS SCIENCE	10.1007/s10488-018-0887-5	ARTICLE	HEALTH POLICY; HUMANS; INTERPERSONAL RELATIONS; MENTAL DISORDERS; MENTAL HEALTH SERVICES; MODELS; PSYCHOLOGICAL; RISK FACTORS; SOCIAL ENVIRONMENT; SOCIOECONOMIC FACTORS; SYSTEMS ANALYSIS; TIME FACTORS; TIME-TO-TREATMENT; HEALTH CARE POLICY; HUMAN; HUMAN RELATION; MENTAL DISEASE; MENTAL HEALTH SERVICE; ORGANIZATION AND MANAGEMENT; PSYCHOLOGICAL MODEL; PSYCHOLOGY; RISK FACTOR; SOCIAL ENVIRONMENT; S…	ADM POLICY MENT HEALTH MENT HEALTH SERV RES	ADM. POLICY MENT. HEALTH MENT. HEALTH SERV. RES.	ENGLISH	SPRINGER NEW YORK LLC	2019	B.A. LANGELLIER; PHILADELPHIA, 3215 MARKET ST, 3RD FLOOR, OFFICE 356, 19104, UNITED STATES; EMAIL: BAL95@DREXEL.EDU	0894587X	ADMINISTRATION AND POLICY IN MENTAL HEALTH AND MENTAL HEALTH SERVICES RESEARCH	26	COMPLEX SYSTEMS APPROACHES TO UNDERSTAND DRIVERS OF MENTAL HEALTH AND INFORM MENTAL HEALTH POLICY A SYSTEMATIC REVIEW	46	ISI	DREXEL UNIVERSITY;THE UNIVERSITY OF MEMPHIS;DREXEL UNIVERSITY;DREXEL UNIVERSITY;	NOTREPORTED;NOTDECLARED;NOTREPORTED	LANGELLIER BA, 2019, ADM POLICY MENT HEALTH MENT HEALTH SERV RES	LANGELLIER BA, 2019, ADM POLICY MENT HEALTH MENT HEALTH SERV RES
WILLIS H;GONZALEZ J;CALL C;QUEZADA D;GAL?N C	none	TELEPSYCHOLOGY AND MHEALTH (TPMH) SERVICES FOR YOUTH AND THEIR FAMILIES HAVE BECOME INCREASINGLY PREVALENT IN RECENT YEARS. HOWEVER, SIGNIFICANT LIMITATIONS IN THEORY, RESEARCH, AND POLICY INTRODUCE QUESTIONS ABOUT THE EFFECTIVENESS OF SUCH INTERVENTIONS, PARTICULARLY FOR RACIAL-ETHNIC MINORITIZED YOUTH AND THEIR FAMILIES, WHO ALREADY CONTEND WITH INEQUITIES IN MENTAL HEALTH TREATMENT ACCESS AND …	SCHOOL OF SOCIAL WORK, COLUMBIA UNIVERSITY, UNITED STATES; DEPARTMENT OF COUNSELING CLINICAL, & SCHOOL PSYCHOLOGY, UNIVERSITY OF CALIFORNIA, UNITED STATES; DEPARTMENT OF PSYCHIATRY, UNIVERSITY OF PITTSBURGH, UNITED STATES; DEPARTMENT OF PSYCHOLOGY, UNIVERSITY OF SOUTHERN CALIFORNIA, UNITED STATES		10.1080/15374416.2022.2124516	ARTICLE	ADOLESCENT; ETHNICITY; HUMANS; MENTAL HEALTH SERVICES; RACIAL GROUPS; TELEMEDICINE; ADOLESCENT; ANCESTRY GROUP; ETHNICITY; HUMAN; MENTAL HEALTH SERVICE; TELEMEDICINE	J CLIN CHILD ADOLESC PSYCHOL	J. CLIN. CHILD ADOLESC. PSYCHOL.	ENGLISH	ROUTLEDGE	2022	H.A. WILLIS; SCHOOL OF SOCIAL WORK, COLUMBIA UNIVERSITY, NEW YORK, 1255 AMSTERDAM AVE, 10027, UNITED STATES; EMAIL: HENRY.WILLIS.JR@GMAIL.COM	15374416	JOURNAL OF CLINICAL CHILD AND ADOLESCENT PSYCHOLOGY	15	CULTURALLY RESPONSIVE TELEPSYCHOLOGY MHEALTH INTERVENTIONS FOR RACIALETHNIC MINORITIZED YOUTH RESEARCH GAPS AND FUTURE DIRECTIONS	51	ISI	COLUMBIA UNIVERSITY;UNIVERSITY OF CALIFORNIA;UNIVERSITY OF PITTSBURGH;UNIVERSITY OF SOUTHERN CALIFORNIA	NOTREPORTED;COLUMBIA UNIVERSITY;NOTREPORTED	WILLIS HA, 2022, J CLIN CHILD ADOLESC PSYCHOL	WILLIS HA, 2022, J CLIN CHILD ADOLESC PSYCHOL
CARMONA R;COOK B;BACA-GARC?A E;CHAVEZ L;ALVAREZ K;IZA M;ALEGR?A M	none	ANALYSES OF HEALTHCARE EXPENDITURES AND ADEQUACY ARE NEEDED TO IDENTIFY COST-EFFECTIVE POLICIES AND PRACTICES THAT IMPROVE MENTAL HEALTHCARE QUALITY. DATA ARE FROM 2010 TO 2012 ELECTRONIC HEALTH RECORDS FROM THREE HOSPITAL PSYCHIATRY DEPARTMENTS IN MADRID (NÃ¿= 29,944 PERSON-YEARS) AND THREE IN BOSTON (NÃ¿= 14,109 PERSON-YEARS). TWO-PART MULTIVARIATE GENERALIZED LINEAR REGRESSION AND LOGISTIC REG…	FUNDACI?N JIMÂNEZ D?AZ, AVDA. REYES CAT?LICOS, 2, MADRID, 28040, SPAIN; HEALTH EQUITY RESEARCH LAB, CAMBRIDGE HEALTH ALLIANCE AND HARVARD MEDICAL SCHOOL, CAMBRIDGE, 01241, MA, UNITED STATES; DEPARTMENT OF PSYCHIATRY, HARVARD MEDICAL SCHOOL, BOSTON, MA, UNITED STATES; PSYCHIATRY DEPARTMENT, AUTONOMA UNIVERSITY OF MADRID, MADRID, SPAIN; DEPARTMENT OF PSYCHIATRY, UNIVERSITY HOSPITAL REY JUAN CARLOS…		10.1007/s11414-018-9596-9	ARTICLE	ADULT; BOSTON; FEMALE; HEALTH CARE COSTS; HOSPITALS; PUBLIC; HUMANS; MALE; MENTAL DISORDERS; MENTAL HEALTH; MIDDLE AGED; PATIENT READMISSION; PSYCHOTROPIC DRUGS; QUALITY OF HEALTH CARE; SPAIN; PSYCHOTROPIC AGENT; ADULT; COMPARATIVE STUDY; ECONOMICS; FEMALE; HEALTH CARE COST; HEALTH CARE QUALITY; HOSPITAL READMISSION; HUMAN; MALE; MASSACHUSETTS; MENTAL DISEASE; MENTAL HEALTH; MIDDLE AGED; PUBLIC H…	J BEHAV HEALTH SERV RES	J. BEHAV. HEALTH SERV. RES.	ENGLISH	SPRINGER NEW YORK LLC	2019	M. ALEGR?A; DISPARITIES RESEARCH UNIT, DEPARTMENT OF MEDICINE, MASSACHUSETTS GENERAL HOSPITAL AND HARVARD MEDICAL SCHOOL, BOSTON, 50 STANIFORD STREET, SUITE 830, 02114, UNITED STATES; EMAIL: MALEGRIA@MGH.HARVARD.EDU	10943412	JOURNAL OF BEHAVIORAL HEALTH SERVICES AND RESEARCH	3	COMPARISON OF MENTAL HEALTH TREATMENT ADEQUACY AND COSTS IN PUBLIC HOSPITALS IN BOSTON AND MADRID	46	ISI	CAMBRIDGE HEALTH ALLIANCE AND HARVARD MEDICAL SCHOOL;HARVARD MEDICAL SCHOOL;AUTONOMA UNIVERSITY OF MADRID;UNIVERSITY HOSPITAL REY JUAN CARLOS;GENERAL HOSPITAL OF VILLALBA;UNIVERSITY HOSPITAL INFANTA ELENA;CARLOS III INSTITUTE OF HEALTH;UNIVERSIDAD CAT?LICA DEL MAULE;UNIVERSITY OF PUERTO RICO MEDICAL SCIENCES CAMPUS;MASSACHUSETTS GENERAL HOSPITAL AND HARVARD MEDICAL SCHOOL	NOTREPORTED;MASSACHUSETTS GENERAL HOSPITAL AND HARVARD MEDICAL SCHOOL;NOTREPORTED	CARMONA R, 2019, J BEHAV HEALTH SERV RES	CARMONA R, 2019, J BEHAV HEALTH SERV RES
WENDELBOE-NELSON C;KELLY S;KENNEDY M;CHERRIE J	none	BACKGROUND: THERE IS A GROWING INTEREST IN RESEARCH INVESTIGATING THE ASSOCIATION BETWEEN GREEN SPACE (GS) AND MENTAL HEALTH AND WELLBEING (HWB), IN ORDER TO UNDERSTAND THE UNDERLYING MECHANISMS. ACCORDINGLY, THERE IS A NEED TO MAP THE LITERATURE AND CREATE AN OVERVIEW OF THE RESEARCH. METHODS: A SCOPING REVIEW APPROACH WAS USED TO MAP LITERATURE ON GS, INCLUDING CONTEXT AND CO-EXPOSURES (THE GS …	INSTITUTE OF BIOLOGICAL CHEMISTRY, BIOPHYSICS AND BIOENGINEERING, HERIOT WATT UNIVERSITY, EDINBURGH, EH14 4AS, UNITED KINGDOM; INFORMATION SERVICES, HERIOT WATT UNIVERSITY, EDINBURGH, EH14 4AS, UNITED KINGDOM; CENTRE FOR HUMAN EXPOSURE SCIENCE, INSTITUTE OF OCCUPATIONAL MEDICINE, RESEARCH AVENUE NORTH, EDINBURGH, EH14 4AP, UNITED KINGDOM	EXPOSOME; GREEN SPACE; MENTAL HEALTH AND WELLBEING	10.3390/ijerph16122081	REVIEW	ECOLOGY; ENVIRONMENT DESIGN; HUMANS; MENTAL HEALTH; OUTCOME ASSESSMENT; HEALTH CARE; QUALITATIVE RESEARCH; RESEARCH DESIGN; RESIDENCE CHARACTERISTICS; GREENSPACE; MAPPING; MENTAL HEALTH; RESEARCH; CONTROLLED STUDY; HUMAN; HUMAN EXPERIMENT; MENTAL HEALTH; OUTCOME ASSESSMENT; RANDOMIZED CONTROLLED TRIAL; REVIEW; WELLBEING; DEMOGRAPHY; ECOLOGY; ENVIRONMENTAL PLANNING; METHODOLOGY; QUALITATIVE RESEAR…	INT J ENVIRON RES PUBLIC HEALTH	INT. J. ENVIRON. RES. PUBLIC HEALTH	ENGLISH	MDPI AG	2019	C. WENDELBOE-NELSON; INSTITUTE OF BIOLOGICAL CHEMISTRY, BIOPHYSICS AND BIOENGINEERING, HERIOT WATT UNIVERSITY, EDINBURGH, EH14 4AS, UNITED KINGDOM; EMAIL: CHARLOTTE.WENDELBOE@GMAIL.COM	16617827	INTERNATIONAL JOURNAL OF ENVIRONMENTAL RESEARCH AND PUBLIC HEALTH	113	A SCOPING REVIEW OF MAPPING RESEARCH ON GREEN SPACE AND ASSOCIATED MENTAL HEALTH BENEFITS	16	ISI	HERIOT WATT UNIVERSITY;HERIOT WATT UNIVERSITY;INSTITUTE OF OCCUPATIONAL MEDICINE	NOTREPORTED;HERIOT WATT UNIVERSITY;NOTREPORTED	WENDELBOE-NELSON C, 2019, INT J ENVIRON RES PUBLIC HEALTH	WENDELBOE-NELSON C, 2019, INT J ENVIRON RES PUBLIC HEALTH
PROBST C;ELTON-MARSHALL T;IMTIAZ S;PATTE K;REHM J;SORNPAISARN B;LEATHERDALE S	none	CANADA IS IN THE MIDST OF AN ONGOING, ESCALATING OPIOID CRISIS, WITH SIGNIFICANT IMPACTS ON ADOLESCENTS AND YOUNG ADULTS. ACCORDINGLY, MENTAL HEALTH IMPAIRMENT WAS EXAMINED AS A RISK FACTOR FOR NON-MEDICAL PRESCRIPTION OPIOID USE (NMPOU) AMONG HIGH SCHOOL STUDENTS. IN ADDITION, THE MODERATING EFFECTS OF THE SCHOOL ENVIRONMENT, IN TERMS OF THE AVAILABILITY OF MENTAL HEALTH SERVICES AND SUBSTANCE U…	CENTRE FOR ADDICTION AND MENTAL HEALTH (CAMH), INSTITUTE FOR MENTAL HEALTH POLICY RESEARCH, TORONTO, M5S 2S1, ON, CANADA; HEIDELBERG INSTITUTE OF GLOBAL HEALTH, UNIVERSITÂŽTSKLINIKUM HEIDELBERG, HEIDELBERG, 69120, GERMANY; DALLA LANA SCHOOL OF PUBLIC HEALTH, UNIVERSITY OF TORONTO, TORONTO, M5T 3M7, ON, CANADA; DEPARTMENT OF HEALTH SCIENCES, BROCK UNIVERSITY, ST. CATHARINES, L2S 3A1, ON, CANADA; C…	ADOLESCENT; ANALGESICS; EDUCATION SETTINGS; MENTAL HEALTH; OPIOID; PRESCRIPTION OPIOIDS; SCHOOL ENVIRONMENT; SCHOOLS; SUBSTANCE USE/ABUSE; YOUTH	10.1007/s00787-020-01518-3	ARTICLE	ANALGESICS; OPIOID; COHORT STUDIES; CROSS-SECTIONAL STUDIES; FEMALE; HUMANS; LONGITUDINAL STUDIES; MALE; MENTAL DISORDERS; MENTAL HEALTH; RISK FACTORS; SCHOOLS; STUDENTS; FENTANYL; NARCOTIC ANALGESIC AGENT; OXYCODONE; PRESCRIPTION DRUG; NARCOTIC ANALGESIC AGENT; ADOLESCENT; ADULT; AFRICAN AMERICAN; ARTICLE; ASIAN; CANNABIS USE; CAUCASIAN; COHORT ANALYSIS; CONTROLLED STUDY; CROSS-SECTIONAL STUDY; …	EUR CHILD ADOLESC PSYCHIATRY	EUR. CHILD ADOLESC. PSYCHIATRY	ENGLISH	SPRINGER SCIENCE AND BUSINESS MEDIA DEUTSCHLAND GMBH	2021	C. PROBST; CENTRE FOR ADDICTION AND MENTAL HEALTH (CAMH), INSTITUTE FOR MENTAL HEALTH POLICY RESEARCH, TORONTO, M5S 2S1, CANADA; EMAIL: MARIECHARLOTTE.PROBST@GMAIL.COM	10188827	EUROPEAN CHILD AND ADOLESCENT PSYCHIATRY	4	A SUPPORTIVE SCHOOL ENVIRONMENT MAY REDUCE THE RISK OF NONMEDICAL PRESCRIPTION OPIOID USE DUE TO IMPAIRED MENTAL HEALTH AMONG STUDENTS	30	ISI	INSTITUTE FOR MENTAL HEALTH POLICY RESEARCH;UNIVERSITÂŽTSKLINIKUM HEIDELBERG;UNIVERSITY OF TORONTO;BROCK UNIVERSITY;CAMPBELL FAMILY MENTAL HEALTH RESEARCH INSTITUTE;UNIVERSITY OF TORONTO;UNIVERSITY OF TORONTO;TECHNISCHE UNIVERSITÂŽT DRESDEN;I.M. SECHENOV FIRST MOSCOW STATE MEDICAL UNIVERSITY;UNIVERSITY OF WATERLOO	NOTREPORTED;INSTITUTE FOR MENTAL HEALTH POLICY RESEARCH;NOTREPORTED	PROBST C, 2021, EUR CHILD ADOLESC PSYCHIATRY	PROBST C, 2021, EUR CHILD ADOLESC PSYCHIATRY
ORMEL J;CUIJPERS P;JORM A;SCHOEVERS R	none	DESPITE SUBSTANTIAL INVESTMENTS IN THE TREATMENT OF MAJOR DEPRESSIVE DISORDER (HEREAFTER ?DEPRESSION?), ESPECIALLY ANTIDEPRESSANT MEDICATIONS AND COGNITIVE BEHAVIORAL THERAPY, EPIDEMIOLOGICAL DATA DO NOT INDICATE THAT DEPRESSION BURDEN, AS MEASURED BY THE PERIOD PREVALENCE, HAS DECREASED IN RECENT DECADES. ALTHOUGH IMPROVING THE DELIVERY AND QUALITY OF TREATMENT WILL UNDOUBTEDLY REDUCE EPISODE DU…	UNIVERSITY OF GRONINGEN, UNIVERSITY MEDICAL CENTER GRONINGEN, HANZEPLEIN 1, 9700RB, NETHERLANDS; VRIJE UNIVERSITEIT (VU), AMSTERDAM, NETHERLANDS; UNIVERSITY OF MELBOURNE, AUSTRALIA; UNIVERSITY OF GRONINGEN, UNIVERSITY MEDICAL CENTER GRONINGEN, NETHERLANDS	DEPRESSION; ENVIRONMENTAL RISKS; ETIOLOGY; PARENTING; PERSONALITY TRAITS; PREVENTION; STRUCTURAL EMBEDMENT; TREATMENT EFFECTIVENESS	10.1016/j.mhp.2019.200177	REVIEW		MENTAL HEALTH PREV	MENTAL HEALTH PREV.	ENGLISH	ELSEVIER GMBH	2020	J. ORMEL; UNIVERSITY OF GRONINGEN, UNIVERSITY MEDICAL CENTER GRONINGEN, HANZEPLEIN 1, 9700RB, NETHERLANDS; EMAIL: J.ORMEL@UMCG.NL	22126570	MENTAL HEALTH AND PREVENTION	43	WHAT IS NEEDED TO ERADICATE THE DEPRESSION EPIDEMIC AND WHY	17	ISI	UNIVERSITY OF GRONINGEN;VRIJE UNIVERSITEIT (VU);UNIVERSITY OF MELBOURNE;UNIVERSITY OF GRONINGEN	NOTREPORTED;UNIVERSITY OF GRONINGEN;NOTREPORTED	ORMEL J, 2020, MENTAL HEALTH PREV	ORMEL J, 2020, MENTAL HEALTH PREV
PHEHLUKWAYO S;TSOKA-GWEGWENI J	none	BACKGROUND: THE GLOBAL SHIFT FROM INSTITUTION-BASED TO COMMUNITY-BASED CARE FOR CHRONIC MENTAL ILLNESS (CMI) CARE RESULTED IN THE DE-INSTITUTIONALIZATION OF CLIENTS WITH CMI. HOWEVER, HEALTH SYSTEMS WHICH HAVE BEEN ORIGINALLY DESIGNED FOR ACUTE HOSPI-TAL-BASED CARE DO NOT SEEM TO BE APPROPRIATELY TRANSFORMED TO MANAGE CMI CARE AT A COMMUNITY LEVEL. AIM: THE AIM OF THIS STUDY WAS TO INVESTIGATE HO…	SCHOOL OF HEALTH SCIENCES, COLLEGE OF HEALTH SCIENCES, UNIVERSITY OF KWAZULU-NATAL, SOUTH AFRICA, PRIVATE BAG X54001, DURBAN, DURBAN, 4000, SOUTH AFRICA; SCHOOL OF NURSING AND PUBLIC HEALTH, COLLEGE OF HEALTH SCIENCES, UNIVERSITY OF KWAZULU-NATAL, DURBAN, SOUTH AFRICA	CHRONIC MENTAL ILLNESS; COMMUNITY SUPPORT SERVICES; DE-INSTITUTIONALIZATION; HEALTH FACILITY SETTINGS	10.4314/ahs.v18i4.24	ARTICLE	CHRONIC DISEASE; COMMUNITY MENTAL HEALTH SERVICES; CRIME; CULTURAL CHARACTERISTICS; HEALTH SERVICES ACCESSIBILITY; HUMANS; INTERVIEWS AS TOPIC; MENTAL DISORDERS; QUALITY OF HEALTH CARE; REFERRAL AND CONSULTATION; SOCIAL STIGMA; SOCIAL WORK; SOCIOECONOMIC FACTORS; TRANSPORTATION; WORKLOAD; ARTICLE; CASE STUDY; COMMUNITY SUPPORT; CULTURAL FACTOR; HEALTH CARE UTILIZATION; HUMAN; MENTAL DISEASE; MENT…	AFR HEALTH SCI	AFR. HEALTH SCI.	ENGLISH	MAKERERE UNIVERSITY, MEDICAL SCHOOL	2018	S.M. PHEHLUKWAYO; SCHOOL OF HEALTH SCIENCES, COLLEGE OF HEALTH SCIENCES, UNIVERSITY OF KWAZULU-NATAL, SOUTH AFRICA, DURBAN, DURBAN, PRIVATE BAG X54001, 4000, SOUTH AFRICA; EMAIL: PHEHLUKWAYOS@UKZN.AC.ZA	16806905	AFRICAN HEALTH SCIENCES	1	INVESTIGATING THE INFLUENCE OF CONTEXTUAL FACTORS IN THE COORDINATION OF CHRONIC MENTAL ILLNESS CARE IN A DISTRICT HEALTH SYSTEM	18	ISI	UNIVERSITY OF KWAZULU-NATAL;UNIVERSITY OF KWAZULU-NATAL	NOTREPORTED;UNIVERSITY OF KWAZULU-NATAL;NOTREPORTED	PHEHLUKWAYO SM, 2018, AFR HEALTH SCI	PHEHLUKWAYO SM, 2018, AFR HEALTH SCI
ROBERTS T;MIGUEL E G;KRUPCHANKA D;SHIDHAYE R;PATEL V;RATHOD S	none	BACKGROUND: THERE IS A LARGE TREATMENT GAP FOR COMMON MENTAL DISORDERS (CMD), WITH WIDE VARIATION BY WORLD REGION. THIS REVIEW IDENTIFIES FACTORS ASSOCIATED WITH FORMAL HEALTH SERVICE UTILISATION FOR CMD IN THE GENERAL ADULT POPULATION, AND COMPARES EVIDENCE FROM HIGH-INCOME COUNTRIES (HIC) WITH THAT FROM LOW-AND-MIDDLE-INCOME COUNTRIES (LMIC). METHODS: WE SEARCHED MEDLINE, PSYCINFO, EMBASE AND S…	LONDON SCHOOL OF HYGIENE AND TROPICAL MEDICINE, CENTRE FOR GLOBAL MENTAL HEALTH, DEPARTMENT OF POPULATION HEALTH, FACULTY OF EPIDEMIOLOGY AND POPULATION HEALTH, KEPPEL STREET, LONDON, WC1E 7HT, UNITED KINGDOM; KING'S COLLEGE LONDON, HEALTH SERVICE AND POPULATION RESEARCH DEPARTMENT, INSTITUTE OF PSYCHIATRY, PSYCHOLOGY AND NEUROSCIENCE, LONDON, UNITED KINGDOM; NATIONAL INSTITUTE OF MENTAL HEALTH, …	ANDERSEN BEHAVIOURAL MODEL; ANXIETY; BARRIERS TO CARE; COMMON MENTAL DISORDERS; DEPRESSION; HEALTH SERVICE UTILISATION; HEALTHCARE ACCESS; SYSTEMATIC REVIEW; TREATMENT SEEKING	10.1186/s12888-018-1837-1	ARTICLE	ADULT; AGED; COMORBIDITY; EMPLOYMENT; ETHNIC GROUPS; FEMALE; HEALTH STATUS; HUMANS; MENTAL DISORDERS; MENTAL HEALTH; MENTAL HEALTH SERVICES; POVERTY; SOCIAL SUPPORT; ARTICLE; CAUCASIAN; COMMON MENTAL DISORDER; COMORBIDITY; DISABILITY; DISEASE DURATION; EDUCATIONAL STATUS; GENDER; HEALTH CARE UTILIZATION; HEALTH INSURANCE; HEALTH SERVICE; HEALTH STATUS; HIGH INCOME COUNTRY; HUMAN; INCOME; LOW INCO…	BMC PSYCHIATRY	BMC PSYCHIATRY	ENGLISH	BIOMED CENTRAL LTD.	2018	T. ROBERTS; LONDON SCHOOL OF HYGIENE AND TROPICAL MEDICINE, CENTRE FOR GLOBAL MENTAL HEALTH, DEPARTMENT OF POPULATION HEALTH, FACULTY OF EPIDEMIOLOGY AND POPULATION HEALTH, LONDON, KEPPEL STREET, WC1E 7HT, UNITED KINGDOM; EMAIL: TESSA.ROBERTS@LSHTM.AC.UK	1471244X	BMC PSYCHIATRY	212	FACTORS ASSOCIATED WITH HEALTH SERVICE UTILISATION FOR COMMON MENTAL DISORDERS A SYSTEMATIC REVIEW	18	ISI	LONDON SCHOOL OF HYGIENE AND TROPICAL MEDICINE;KING'S COLLEGE LONDON;NATIONAL INSTITUTE OF MENTAL HEALTH;UNIVERSITY OF GENEVA;CENTRE FOR CHRONIC CONDITIONS AND INJURIES;MAASTRICHT UNIVERSITY;HARVARD MEDICAL SCHOOL	NOTREPORTED;LONDON SCHOOL OF HYGIENE AND TROPICAL MEDICINE;NOTREPORTED	ROBERTS T, 2018, BMC PSYCHIATRY	ROBERTS T, 2018, BMC PSYCHIATRY
AWADALLA S;DAVIES E;GLAZEBROOK C	none	BACKGROUND: MANY UNIVERSITY STUDENTS EXPERIENCE DEPRESSION AND ANXIETY, BOTH OF WHICH HAVE BEEN SHOWN TO AFFECT COGNITIVE FUNCTION. HOWEVER, THE IMPACT OF THESE EMOTIONAL DIFFICULTIES ON ACADEMIC PERFORMANCE IS UNCLEAR. THIS STUDY AIMS TO DETERMINE THE PREVALENCE OF DEPRESSION AND ANXIETY IN UNIVERSITY STUDENTS IN UNITED ARAB EMIRATES (UAE). IT FURTHER SEEKS TO EXPLORE THE RELATIONSHIP BETWEEN EM…	DIVISION OF PSYCHIATRY AND APPLIED PSYCHOLOGY, UNIVERSITY OF NOTTINGHAM, NOTTINGHAM, NG7 2UH, UNITED KINGDOM; COLLEGE OF NATURAL AND HEALTH SCIENCES, DEPARTMENT OF PSYCHOLOGY, ZAYED UNIVERSITY, DUBAI, UNITED ARAB EMIRATES; NIHR MINDTECH MEDTECH COOPERATIVE INSTITUTE OF MENTAL HEALTH, UNIVERSITY OF NOTTINGHAM INNOVATION PARK, JUBILEE CAMPUS, TRIUMPH ROAD, NOTTINGHAM, NG7 2TU, UNITED KINGDOM	ACADEMIC PERFORMANCE; ANXIETY; DEPRESSION; UNIVERSITY STUDENTS	10.1186/s12888-020-02854-z	ARTICLE	ACADEMIC PERFORMANCE; ADOLESCENT; ADULT; ANXIETY; ANXIETY DISORDERS; COHORT STUDIES; DEPRESSION; DEPRESSIVE DISORDER; MAJOR; FEMALE; HUMANS; LONGITUDINAL STUDIES; MALE; STUDENTS; UNITED ARAB EMIRATES; UNIVERSITIES; YOUNG ADULT; ACADEMIC ACHIEVEMENT; ADOLESCENT; ADULT; ANXIETY ASSESSMENT; ANXIETY DISORDER; ARTICLE; CLINICAL ASSESSMENT; CLINICAL FEATURE; COHORT ANALYSIS; CONTROLLED STUDY; DEPRESSIO…	BMC PSYCHIATRY	BMC PSYCHIATRY	ENGLISH	BIOMED CENTRAL LTD	2020	C. GLAZEBROOK; DIVISION OF PSYCHIATRY AND APPLIED PSYCHOLOGY, UNIVERSITY OF NOTTINGHAM, NOTTINGHAM, NG7 2UH, UNITED KINGDOM; EMAIL: CRIS.GLAZEBROOK@NOTTINGHAM.AC.UK	1471244X	BMC PSYCHIATRY	81	A LONGITUDINAL COHORT STUDY TO EXPLORE THE RELATIONSHIP BETWEEN DEPRESSION ANXIETY AND ACADEMIC PERFORMANCE AMONG EMIRATI UNIVERSITY STUDENTS	20	ISI	UNIVERSITY OF NOTTINGHAM;ZAYED UNIVERSITY;UNIVERSITY OF NOTTINGHAM INNOVATION PARK	NOTREPORTED;UNIVERSITY OF NOTTINGHAM;NOTREPORTED	AWADALLA S, 2020, BMC PSYCHIATRY	AWADALLA S, 2020, BMC PSYCHIATRY
SANTOS M;ROZA D;BARROS R;SANTOS J;RAZZOUK D;AZEVEDO-MARQUES J;MENEZES P;DEL-BEN C	none	KNOWLEDGE ABOUT THE NEEDS OF PSYCHIATRIC PATIENTS IS ESSENTIAL FOR MENTAL HEALTH CARE PLANNING. HOWEVER, RESEARCH ON MET AND UNMET NEEDS IS STILL SCARCE, PARTICULARLY IN LOW-AND MIDDLE-INCOME COUNTRIES. THIS STUDY AIMED TO DESCRIBE THE PATIENTS? NEEDS (MET AND UNMET) AT LEAST FOUR YEARS AFTER THEIR FIRST PSYCHIATRIC HOSPITALIZATION AND TO VERIFY THE ROLE OF DEMOGRAPHIC AND CLINICAL FEATURES AS PO…	DEPARTAMENTO DE NEUROCI?NCIAS E CI?NCIAS DO COMPORTAMENTO, FACULDADE DE MEDICINA DE RIBEIR?O PRETO, UNIVERSIDADE DE S?O PAULO, RIBEIR?O PRETO, SP, BRAZIL; DEPARTAMENTO DE MEDICINA SOCIAL, FACULDADE DE MEDICINA DE RIBEIR?O PRETO, UNIVERSIDADE DE S?O PAULO, RIBEIR?O PRETO, SP, BRAZIL; CENTRO DE ECONOMIA DA SA?DE MENTAL, DEPARTAMENTO DE PSIQUIATRIA, UNIVERSIDADE FEDERAL DE S?O PAULO, S?O PAULO, SP, …	BRAZIL; COHORT; LOW-AND MIDDLE-INCOME COUNTRIES; MENTAL DISORDERS; NEEDS ASSESSMENT	10.1590/1414-431X2021e11447	ARTICLE	BRAZIL; COHORT STUDIES; HOSPITALIZATION; HUMANS; INPATIENTS; NEEDS ASSESSMENT; ADULT; ARTICLE; BINOMIAL DISTRIBUTION; BRAZIL; BRAZILIAN; CAREGIVER; CLINICAL FEATURE; COHORT ANALYSIS; DEMOGRAPHY; DEPRESSION; DISTRESS SYNDROME; FEMALE; FOLLOW UP; HEALTH; HEALTH CARE PLANNING; HEALTH CARE POLICY; HEALTH SERVICE; HOSPITAL PATIENT; HOSPITAL READMISSION; HOSPITALIZATION; HOUSEHOLD; HUMAN; INTERVIEW; LE…	BRAZ J MED BIOL RES	BRAZ. J. MED. BIOL. RES.	ENGLISH	ASSOCIACAO BRASILEIRA DE DIVULGACAO CIENTIFICA	2021	D.L. ROZA; DEPARTAMENTO DE NEUROCI?NCIAS E CI?NCIAS DO COMPORTAMENTO, FACULDADE DE MEDICINA DE RIBEIR?O PRETO, UNIVERSIDADE DE S?O PAULO, RIBEIR?O PRETO, SP, BRAZIL; EMAIL: DAIANEROZA@USP.BR	1414431X	BRAZILIAN JOURNAL OF MEDICAL AND BIOLOGICAL RESEARCH	2	PATIENT NEEDS FOUR YEARS AFTER FIRST PSYCHIATRIC HOSPITALIZATION IN A BRAZILIAN COHORT	54	ISI	UNIVERSIDADE DE S?O PAULO;UNIVERSIDADE DE S?O PAULO;UNIVERSIDADE FEDERAL DE S?O PAULO;UNIVERSIDADE DE S?O PAULO;UNIVERSIDADE DE S?O PAULO	NOTREPORTED;UNIVERSIDADE DE S?O PAULO;NOTREPORTED	SANTOS MESB, 2021, BRAZ J MED BIOL RES	SANTOS MESB, 2021, BRAZ J MED BIOL RES
PHAN J;LIU H;YASUI M;LIU C	none		LOYOLA UNIVERSITY CHICAGO, 1000 W SHERIDAN RD., CHICAGO, 60660, IL, UNITED STATES; HARVARD KENNEDY SCHOOL, 79 JFK STREET, BOX 103, CAMBRIDGE, 02138, MA, UNITED STATES; SCHOOL OF SOCIAL SERVICE ADMINISTRATION, 969 E. 60TH STREET, CHICAGO, 60637, IL, UNITED STATES; BRIGHAM AND WOMEN'S HOSPITAL, HARVARD MEDICAL SCHOOL, 221 LONGWOOD AVE., BOSTON, 02446, MA, UNITED STATES		10.1016/j.apnu.2019.01.007	ARTICLE	ADULT; DEPRESSION; DEPRESSION; POSTPARTUM; FEMALE; HUMANS; MOTHERS; NEW YORK CITY; PREGNANCY; PRENATAL CARE; STRESS; PSYCHOLOGICAL; SURVEYS AND QUESTIONNAIRES; ADULT; DEPRESSION; FEMALE; HUMAN; MENTAL STRESS; MOTHER; NEW YORK; POSTNATAL DEPRESSION; PREGNANCY; PRENATAL CARE; PSYCHOLOGY; QUESTIONNAIRE; STATISTICS AND NUMERICAL DATA	ARCH PSYCHIATR NURS	ARCH. PSYCHIATR. NURS.	ENGLISH	W.B. SAUNDERS	2019	J. PHAN; LOYOLA UNIVERSITY CHICAGO, CHICAGO, 1000 W SHERIDAN RD., 60660, UNITED STATES; EMAIL: JPHAN4@LUC.EDU	8839417	ARCHIVES OF PSYCHIATRIC NURSING	3	PSYCHOSOCIAL AND HEALTHCARE EXPERIENCES AMONG WOMEN WITH PREPREGNANCY MENTAL HEALTH CONCERNS	33	ISI	LOYOLA UNIVERSITY CHICAGO;HARVARD KENNEDY SCHOOL;SCHOOL OF SOCIAL SERVICE ADMINISTRATION;HARVARD MEDICAL SCHOOL	NOTREPORTED;LOYOLA UNIVERSITY CHICAGO;NOTREPORTED	PHAN J, 2019, ARCH PSYCHIATR NURS	PHAN J, 2019, ARCH PSYCHIATR NURS
[truncated: 281 more rows]
